# Supplementary material for: Malaria inflammation by xanthine oxidase‐produced reactive oxygen species
Source: PubMed Central journal article supplement (PMC6685105; doi:10.15252/emmm.201809903), 2019-07-02
Supplement: EMMM-11-e9903-s002.pdf [file EMMM-11-e9903-s002.pdf]

SourceDataforFigure1A

Prism 8

File Sheet Undo Clipboard Analysis Change Import Draw Write Text Export Print Send LA Help

Q Search

Table format: Grouped

|                                                 |    | Group A | Group B | Group C | Group D | Group E   | Group F | Group G | Group H | Group I | Group J | Group K | Group L | Group M | Group N |
|-------------------------------------------------|----|---------|---------|---------|---------|-----------|---------|---------|---------|---------|---------|---------|---------|---------|---------|
|                                                 |    | Donor 3 | Donor 2 | Donor 1 | Donor 4 | Title     | Title   | Title   | Title   | Title   | Title   | Title   | Title   | Title   | Title   |
| IL-1beta                                        |    | Y       | Y       | Y       | Y       | Y         | Y       | Y       | Y       | Y       | Y       | Y       | Y       | Y       | Y       |
| IL-6                                            | 1  | Control | 1.00    | 1.00    | 1.00    | 1.000000  |         |         |         |         |         |         |         |         |         |
| IL-10                                           | 2  | RBC     | 1.00    | 1.00    | 1.00    | 6.487088  |         |         |         |         |         |         |         |         |         |
| TNF                                             | 3  | iRBC    | 1.00    | 1.00    | 1.00    | 3.740610  |         |         |         |         |         |         |         |         |         |
| New Data Table...                               | 4  | LPS     | 9.88    | 59.45   | 86.73   | 46.471830 |         |         |         |         |         |         |         |         |         |
| Info                                            | 5  | Title   |         |         |         |           |         |         |         |         |         |         |         |         |         |
| New Info...                                     | 6  | Title   |         |         |         |           |         |         |         |         |         |         |         |         |         |
| Results                                         | 7  | Title   |         |         |         |           |         |         |         |         |         |         |         |         |         |
| Transpose of IL-1beta                           | 8  | Title   |         |         |         |           |         |         |         |         |         |         |         |         |         |
| Ordinary one-way ANOVA of Transpose of IL-1beta | 9  | Title   |         |         |         |           |         |         |         |         |         |         |         |         |         |
| Transpose of IL-6                               | 10 | Title   |         |         |         |           |         |         |         |         |         |         |         |         |         |
| Friedman test of Transpose of IL-6              | 11 | Title   |         |         |         |           |         |         |         |         |         |         |         |         |         |
| Transpose of IL-10                              | 12 | Title   |         |         |         |           |         |         |         |         |         |         |         |         |         |
| Ordinary one-way ANOVA of Transpose of IL-10    | 13 | Title   |         |         |         |           |         |         |         |         |         |         |         |         |         |
| Transpose of TNF                                | 14 | Title   |         |         |         |           |         |         |         |         |         |         |         |         |         |
| Ordinary one-way ANOVA of Transpose of TNF      | 15 | Title   |         |         |         |           |         |         |         |         |         |         |         |         |         |
| New Analysis...                                 | 16 | Title   |         |         |         |           |         |         |         |         |         |         |         |         |         |
| Graphs                                          | 17 | Title   |         |         |         |           |         |         |         |         |         |         |         |         |         |
| IL-1beta                                        | 18 | Title   |         |         |         |           |         |         |         |         |         |         |         |         |         |
| IL-6                                            | 19 | Title   |         |         |         |           |         |         |         |         |         |         |         |         |         |
| IL-10                                           | 20 | Title   |         |         |         |           |         |         |         |         |         |         |         |         |         |
| TNF                                             | 21 | Title   |         |         |         |           |         |         |         |         |         |         |         |         |         |
| New Graph...                                    | 22 | Title   |         |         |         |           |         |         |         |         |         |         |         |         |         |
| Layouts                                         | 23 | Title   |         |         |         |           |         |         |         |         |         |         |         |         |         |
| New Layout...                                   | 24 | Title   |         |         |         |           |         |         |         |         |         |         |         |         |         |
| Family                                          | 25 | Title   |         |         |         |           |         |         |         |         |         |         |         |         |         |
| IL-1beta                                        | 26 | Title   |         |         |         |           |         |         |         |         |         |         |         |         |         |
| Transpose                                       | 27 | Title   |         |         |         |           |         |         |         |         |         |         |         |         |         |
| Ordinary one-way ANOVA                          | 28 | Title   |         |         |         |           |         |         |         |         |         |         |         |         |         |
| IL-1beta                                        | 29 | Title   |         |         |         |           |         |         |         |         |         |         |         |         |         |

Row 1, Column RT, Selected: Rows 4, Columns 5

SourceDataforFigure1A

Prism 8

File Sheet Undo Clipboard Analysis Change Import Draw Write Text Export Print Send LA Help

Q Search

Table format: Grouped

|                                                 |    | Group A | Group B     | Group C | Group D    | Group E    | Group F | Group G | Group H | Group I | Group J | Group K | Group L |
|-------------------------------------------------|----|---------|-------------|---------|------------|------------|---------|---------|---------|---------|---------|---------|---------|
| ▼ Data Tables                                   |    | Donor 3 | Donor 2     | Donor 1 | Donor 4    | Title      | Title   | Title   | Title   | Title   | Title   | Title   | Title   |
| IL-1beta                                        |    | Y       | Y           | Y       | Y          | Y          | Y       | Y       | Y       | Y       | Y       | Y       | Y       |
| IL-6                                            | 1  | Control | 1.000000    | 1.00    | 1.000000   | 1.000000   |         |         |         |         |         |         |         |
| IL-10                                           | 2  | RBC     | 0.833887    | 1.00    | 0.698930   | 5.314219   |         |         |         |         |         |         |         |
| TNF                                             | 3  | iRBC    | 0.963455    | 3.08    | 0.959051   | 5.442364   |         |         |         |         |         |         |         |
| New Data Table...                               | 4  | LPS     | 2328.126000 | 6850.26 | 813.036700 | 991.386800 |         |         |         |         |         |         |         |
| ▼ Info                                          | 5  | Title   |             |         |            |            |         |         |         |         |         |         |         |
| New Info...                                     | 6  | Title   |             |         |            |            |         |         |         |         |         |         |         |
| ▼ Results                                       | 7  | Title   |             |         |            |            |         |         |         |         |         |         |         |
| Transpose of IL-1beta                           | 8  | Title   |             |         |            |            |         |         |         |         |         |         |         |
| Ordinary one-way ANOVA of Transpose of IL-1beta | 9  | Title   |             |         |            |            |         |         |         |         |         |         |         |
| Transpose of IL-6                               | 10 | Title   |             |         |            |            |         |         |         |         |         |         |         |
| Friedman test of Transpose of IL-6              | 11 | Title   |             |         |            |            |         |         |         |         |         |         |         |
| Transpose of IL-10                              | 12 | Title   |             |         |            |            |         |         |         |         |         |         |         |
| Ordinary one-way ANOVA of Transpose of IL-10    | 13 | Title   |             |         |            |            |         |         |         |         |         |         |         |
| Transpose of TNF                                | 14 | Title   |             |         |            |            |         |         |         |         |         |         |         |
| Ordinary one-way ANOVA of Transpose of TNF      | 15 | Title   |             |         |            |            |         |         |         |         |         |         |         |
| New Analysis...                                 | 16 | Title   |             |         |            |            |         |         |         |         |         |         |         |
| ▼ Graphs                                        | 17 | Title   |             |         |            |            |         |         |         |         |         |         |         |
| IL-1beta                                        | 18 | Title   |             |         |            |            |         |         |         |         |         |         |         |
| IL-6                                            | 19 | Title   |             |         |            |            |         |         |         |         |         |         |         |
| IL-10                                           | 20 | Title   |             |         |            |            |         |         |         |         |         |         |         |
| TNF                                             | 21 | Title   |             |         |            |            |         |         |         |         |         |         |         |
| New Graph...                                    | 22 | Title   |             |         |            |            |         |         |         |         |         |         |         |
| ▼ Layouts                                       | 23 | Title   |             |         |            |            |         |         |         |         |         |         |         |
| New Layout...                                   | 24 | Title   |             |         |            |            |         |         |         |         |         |         |         |
| Family                                          | 25 | Title   |             |         |            |            |         |         |         |         |         |         |         |
| IL-6                                            | 26 | Title   |             |         |            |            |         |         |         |         |         |         |         |
| Transpose                                       | 27 | Title   |             |         |            |            |         |         |         |         |         |         |         |
| Friedman test                                   | 28 | Title   |             |         |            |            |         |         |         |         |         |         |         |
| IL-6                                            | 29 | Title   |             |         |            |            |         |         |         |         |         |         |         |

IL-6

Row 1, Column RT, Selected: Rows 4, Columns 5

SourceDataforFigure1A

Prism 8

File Sheet Undo Clipboard Analysis Change Import Draw Write Text Export Print Send LA Help

Search

Table format: Grouped

|    |         | Group A   | Group B | Group C   | Group D    | Group E | Group F | Group G | Group H | Group I | Group J | Group K | Group L | Group M | Group N |
|----|---------|-----------|---------|-----------|------------|---------|---------|---------|---------|---------|---------|---------|---------|---------|---------|
|    |         | Donor 3   | Donor 2 | Donor 1   | Donor 4    | Title   | Title   | Title   | Title   | Title   | Title   | Title   | Title   | Title   | Title   |
| 1  | Control | 1.000000  | 1.00    | 1.000000  | 1.000000   | Y       | Y       | Y       | Y       | Y       | Y       | Y       | Y       | Y       | Y       |
| 2  | RBC     | 1.727273  | 1.00    | 0.821862  | 2.070681   |         |         |         |         |         |         |         |         |         |         |
| 3  | iRBC    | 1.409091  | 1.04    | 3.082996  | 2.717278   |         |         |         |         |         |         |         |         |         |         |
| 4  | LPS     | 80.272730 | 46.61   | 35.054660 | 103.672800 |         |         |         |         |         |         |         |         |         |         |
| 5  | Title   |           |         |           |            |         |         |         |         |         |         |         |         |         |         |
| 6  | Title   |           |         |           |            |         |         |         |         |         |         |         |         |         |         |
| 7  | Title   |           |         |           |            |         |         |         |         |         |         |         |         |         |         |
| 8  | Title   |           |         |           |            |         |         |         |         |         |         |         |         |         |         |
| 9  | Title   |           |         |           |            |         |         |         |         |         |         |         |         |         |         |
| 10 | Title   |           |         |           |            |         |         |         |         |         |         |         |         |         |         |
| 11 | Title   |           |         |           |            |         |         |         |         |         |         |         |         |         |         |
| 12 | Title   |           |         |           |            |         |         |         |         |         |         |         |         |         |         |
| 13 | Title   |           |         |           |            |         |         |         |         |         |         |         |         |         |         |
| 14 | Title   |           |         |           |            |         |         |         |         |         |         |         |         |         |         |
| 15 | Title   |           |         |           |            |         |         |         |         |         |         |         |         |         |         |
| 16 | Title   |           |         |           |            |         |         |         |         |         |         |         |         |         |         |
| 17 | Title   |           |         |           |            |         |         |         |         |         |         |         |         |         |         |
| 18 | Title   |           |         |           |            |         |         |         |         |         |         |         |         |         |         |
| 19 | Title   |           |         |           |            |         |         |         |         |         |         |         |         |         |         |
| 20 | Title   |           |         |           |            |         |         |         |         |         |         |         |         |         |         |
| 21 | Title   |           |         |           |            |         |         |         |         |         |         |         |         |         |         |
| 22 | Title   |           |         |           |            |         |         |         |         |         |         |         |         |         |         |
| 23 | Title   |           |         |           |            |         |         |         |         |         |         |         |         |         |         |
| 24 | Title   |           |         |           |            |         |         |         |         |         |         |         |         |         |         |
| 25 | Title   |           |         |           |            |         |         |         |         |         |         |         |         |         |         |
| 26 | Title   |           |         |           |            |         |         |         |         |         |         |         |         |         |         |
| 27 | Title   |           |         |           |            |         |         |         |         |         |         |         |         |         |         |
| 28 | Title   |           |         |           |            |         |         |         |         |         |         |         |         |         |         |
| 29 | Title   |           |         |           |            |         |         |         |         |         |         |         |         |         |         |

IL-10

Row 1, Column RT

SourceDataforFigure1A

Prism 8

File Sheet Undo Clipboard Analysis Change Import Draw Write Text Export Print Send LA Help

Q Search

Table format: Grouped

|    |         | Group A    | Group B     | Group C    | Group D   | Group E | Group F | Group G | Group H | Group I | Group J | Group K | Group L | Group M | G |
|----|---------|------------|-------------|------------|-----------|---------|---------|---------|---------|---------|---------|---------|---------|---------|---|
|    |         | Donor 3    | Donor 2     | Donor 1    | Donor 4   | Title   | Title   | Title   | Title   | Title   | Title   | Title   | Title   | Title   |   |
|    |         | Y          | Y           | Y          | Y         | Y       | Y       | Y       | Y       | Y       | Y       | Y       | Y       | Y       |   |
| 1  | Control | 1.000000   | 1.000000    | 1.000000   | 1.000000  |         |         |         |         |         |         |         |         |         |   |
| 2  | RBC     | 0.651576   | 3.017442    | 0.961616   | 2.032318  |         |         |         |         |         |         |         |         |         |   |
| 3  | iRBC    | 3.468068   | 6.784884    | 6.992323   | 2.445283  |         |         |         |         |         |         |         |         |         |   |
| 4  | LPS     | 789.660500 | 1455.105000 | 308.201300 | 55.278760 |         |         |         |         |         |         |         |         |         |   |
| 5  | Title   |            |             |            |           |         |         |         |         |         |         |         |         |         |   |
| 6  | Title   |            |             |            |           |         |         |         |         |         |         |         |         |         |   |
| 7  | Title   |            |             |            |           |         |         |         |         |         |         |         |         |         |   |
| 8  | Title   |            |             |            |           |         |         |         |         |         |         |         |         |         |   |
| 9  | Title   |            |             |            |           |         |         |         |         |         |         |         |         |         |   |
| 10 | Title   |            |             |            |           |         |         |         |         |         |         |         |         |         |   |
| 11 | Title   |            |             |            |           |         |         |         |         |         |         |         |         |         |   |
| 12 | Title   |            |             |            |           |         |         |         |         |         |         |         |         |         |   |
| 13 | Title   |            |             |            |           |         |         |         |         |         |         |         |         |         |   |
| 14 | Title   |            |             |            |           |         |         |         |         |         |         |         |         |         |   |
| 15 | Title   |            |             |            |           |         |         |         |         |         |         |         |         |         |   |
| 16 | Title   |            |             |            |           |         |         |         |         |         |         |         |         |         |   |
| 17 | Title   |            |             |            |           |         |         |         |         |         |         |         |         |         |   |
| 18 | Title   |            |             |            |           |         |         |         |         |         |         |         |         |         |   |
| 19 | Title   |            |             |            |           |         |         |         |         |         |         |         |         |         |   |
| 20 | Title   |            |             |            |           |         |         |         |         |         |         |         |         |         |   |
| 21 | Title   |            |             |            |           |         |         |         |         |         |         |         |         |         |   |
| 22 | Title   |            |             |            |           |         |         |         |         |         |         |         |         |         |   |
| 23 | Title   |            |             |            |           |         |         |         |         |         |         |         |         |         |   |
| 24 | Title   |            |             |            |           |         |         |         |         |         |         |         |         |         |   |
| 25 | Title   |            |             |            |           |         |         |         |         |         |         |         |         |         |   |
| 26 | Title   |            |             |            |           |         |         |         |         |         |         |         |         |         |   |
| 27 | Title   |            |             |            |           |         |         |         |         |         |         |         |         |         |   |
| 28 | Title   |            |             |            |           |         |         |         |         |         |         |         |         |         |   |
| 29 | Title   |            |             |            |           |         |         |         |         |         |         |         |         |         |   |

Family

- TNF
  - Transpose
  - Ordinary one-way ANOVA
- TNF

Row 1, Column RT

SourceDataforFigure1A

File Sheet Undo Clipboard Analysis Interpret Change Draw Write Text Export Print Send LA Help

Prism 8

Search ANOVA results Multiple comparisons

▼ Data Tables

- IL-1beta
- IL-6
- IL-10
- TNF
- New Data Table...

▼ Info

- New Info...

▼ Results

- Transpose of IL-1beta
- Ordinary one-way ANOVA of Transpose of IL-1beta**
- Transpose of IL-6
- Friedman test of Transpose of IL-6
- Transpose of IL-10
- Ordinary one-way ANOVA of Transpose of IL-10
- Transpose of TNF
- Ordinary one-way ANOVA of Transpose of TNF
- New Analysis...

▼ Graphs

- IL-1beta
- IL-6
- IL-10
- TNF
- New Graph...

▼ Layouts

- New Layout...

Family

- IL-1beta
- Transpose
- Ordinary one-way ANOVA**

| Ordinary one-way ANOVA |                                             | ANOVA results         |           |           |                     |                |
|------------------------|---------------------------------------------|-----------------------|-----------|-----------|---------------------|----------------|
| 1                      | Table Analyzed                              | Transpose of IL-1beta |           |           |                     |                |
| 2                      | Data sets analyzed                          | A-D                   |           |           |                     |                |
| 3                      |                                             |                       |           |           |                     |                |
| 4                      | <b>ANOVA summary</b>                        |                       |           |           |                     |                |
| 5                      | F                                           | 9.318                 |           |           |                     |                |
| 6                      | P value                                     | 0.0019                |           |           |                     |                |
| 7                      | P value summary                             | **                    |           |           |                     |                |
| 8                      | Significant diff. among means (P < 0.05)?   | Yes                   |           |           |                     |                |
| 9                      | R square                                    | 0.6997                |           |           |                     |                |
| 10                     |                                             |                       |           |           |                     |                |
| 11                     | <b>Brown-Forsythe test</b>                  |                       |           |           |                     |                |
| 12                     | F (DFn, DFd)                                | 5.225 (3, 12)         |           |           |                     |                |
| 13                     | P value                                     | 0.0154                |           |           |                     |                |
| 14                     | P value summary                             | *                     |           |           |                     |                |
| 15                     | Are SDs significantly different (P < 0.05)? | Yes                   |           |           |                     |                |
| 16                     |                                             |                       |           |           |                     |                |
| 17                     | <b>Bartlett's test</b>                      |                       |           |           |                     |                |
| 18                     | Bartlett's statistic (corrected)            |                       |           |           |                     |                |
| 19                     | P value                                     |                       |           |           |                     |                |
| 20                     | P value summary                             |                       |           |           |                     |                |
| 21                     | Are SDs significantly different (P < 0.05)? |                       |           |           |                     |                |
| 22                     |                                             |                       |           |           |                     |                |
| 23                     | <b>ANOVA table</b>                          | <b>SS</b>             | <b>DF</b> | <b>MS</b> | <b>F (DFn, DFd)</b> | <b>P value</b> |
| 24                     | Treatment (between columns)                 | 7191                  | 3         | 2397      | F (3, 12) = 9.318   | P=0.0019       |
| 25                     | Residual (within columns)                   | 3087                  | 12        | 257.3     |                     |                |
| 26                     | Total                                       | 10278                 | 15        |           |                     |                |
| 27                     |                                             |                       |           |           |                     |                |
| 28                     | <b>Data summary</b>                         |                       |           |           |                     |                |

Ordinary one-way ANOVA of Transpose of IL-1beta Row 25, Column RT

SourceDataforFigure1A

Prism 8

File Sheet Undo Clipboard Analysis Interpret Change Draw Write Text Export Print Send LA Help

Q Search

▼ Data Tables

- IL-1beta
- IL-6
- IL-10
- TNF
- New Data Table...

▼ Info

- New Info...

▼ Results

- Transpose of IL-1beta
- Ordinary one-way ANOVA of Transpose of IL-1beta
- Transpose of IL-6
- Friedman test of Transpose of IL-6
- Transpose of IL-10
- Ordinary one-way ANOVA of Transpose of IL-10
- Transpose of TNF
- Ordinary one-way ANOVA of Transpose of TNF
- New Analysis...

▼ Graphs

- IL-1beta
- IL-6
- IL-10
- TNF
- New Graph...

▼ Layouts

- New Layout...

Family

- IL-1beta
  - Transpose
  - Ordinary one-way ANOVA

|    |           | A       | B     | C     | D      | E     | F     | G     | H     | I     | J     | K     | L     | M     |
|----|-----------|---------|-------|-------|--------|-------|-------|-------|-------|-------|-------|-------|-------|-------|
|    | Transpose | Control | RBC   | iRBC  | LPS    | Title | Title | Title | Title | Title | Title | Title | Title | Title |
|    |           | Y       | Y     | Y     | Y      | Y     | Y     | Y     | Y     | Y     | Y     | Y     | Y     | Y     |
| 1  | Donor 3   | 1.000   | 1.000 | 1.000 | 9.880  |       |       |       |       |       |       |       |       |       |
| 2  | Donor 2   | 1.000   | 1.000 | 1.000 | 59.450 |       |       |       |       |       |       |       |       |       |
| 3  | Donor 1   | 1.000   | 1.000 | 1.000 | 86.730 |       |       |       |       |       |       |       |       |       |
| 4  | Donor 4   | 1.000   | 6.487 | 3.741 | 46.472 |       |       |       |       |       |       |       |       |       |
| 5  |           |         |       |       |        |       |       |       |       |       |       |       |       |       |
| 6  |           |         |       |       |        |       |       |       |       |       |       |       |       |       |
| 7  |           |         |       |       |        |       |       |       |       |       |       |       |       |       |
| 8  |           |         |       |       |        |       |       |       |       |       |       |       |       |       |
| 9  |           |         |       |       |        |       |       |       |       |       |       |       |       |       |
| 10 |           |         |       |       |        |       |       |       |       |       |       |       |       |       |
| 11 |           |         |       |       |        |       |       |       |       |       |       |       |       |       |
| 12 |           |         |       |       |        |       |       |       |       |       |       |       |       |       |
| 13 |           |         |       |       |        |       |       |       |       |       |       |       |       |       |
| 14 |           |         |       |       |        |       |       |       |       |       |       |       |       |       |
| 15 |           |         |       |       |        |       |       |       |       |       |       |       |       |       |
| 16 |           |         |       |       |        |       |       |       |       |       |       |       |       |       |
| 17 |           |         |       |       |        |       |       |       |       |       |       |       |       |       |
| 18 |           |         |       |       |        |       |       |       |       |       |       |       |       |       |
| 19 |           |         |       |       |        |       |       |       |       |       |       |       |       |       |
| 20 |           |         |       |       |        |       |       |       |       |       |       |       |       |       |
| 21 |           |         |       |       |        |       |       |       |       |       |       |       |       |       |
| 22 |           |         |       |       |        |       |       |       |       |       |       |       |       |       |
| 23 |           |         |       |       |        |       |       |       |       |       |       |       |       |       |
| 24 |           |         |       |       |        |       |       |       |       |       |       |       |       |       |
| 25 |           |         |       |       |        |       |       |       |       |       |       |       |       |       |
| 26 |           |         |       |       |        |       |       |       |       |       |       |       |       |       |
| 27 |           |         |       |       |        |       |       |       |       |       |       |       |       |       |
| 28 |           |         |       |       |        |       |       |       |       |       |       |       |       |       |
| 29 |           |         |       |       |        |       |       |       |       |       |       |       |       |       |

Transpose of IL-1beta

Row 1, Column RT

SourceDataforFigure1A

File Sheet Undo Clipboard Analysis Interpret Change Draw Write Text Export Print Send LA Help

Prism 8

Q Search ANOVA results Multiple comparisons

▼ Data Tables

- IL-1beta
- IL-6
- IL-10
- TNF
- New Data Table...

▼ Info

- New Info...

▼ Results

- Transpose of IL-1beta
- Ordinary one-way ANOVA of Transpose of IL-1beta**
- Transpose of IL-6
- Friedman test of Transpose of IL-6
- Transpose of IL-10
- Ordinary one-way ANOVA of Transpose of IL-10
- Transpose of TNF
- Ordinary one-way ANOVA of Transpose of TNF
- New Analysis...

▼ Graphs

- IL-1beta
- IL-6
- IL-10
- TNF
- New Graph...

▼ Layouts

- New Layout...

Family

- IL-1beta
- Transpose
- Ordinary one-way ANOVA**

| Ordinary one-way ANOVA |                                        |            |              |            |                  |    |    |         |    |
|------------------------|----------------------------------------|------------|--------------|------------|------------------|----|----|---------|----|
| Multiple comparisons   |                                        |            |              |            |                  |    |    |         |    |
| 1                      | Number of families                     | 1          |              |            |                  |    |    |         |    |
| 2                      | Number of comparisons per family       | 6          |              |            |                  |    |    |         |    |
| 3                      | Alpha                                  | 0.05       |              |            |                  |    |    |         |    |
| 4                      |                                        |            |              |            |                  |    |    |         |    |
| 5                      | Holm-Sidak's multiple comparisons test | Mean Diff. | Significant? | Summary    | Adjusted P Value |    |    |         |    |
| 6                      | Control vs. RBC                        | -1.372     | No           | ns         | 0.9992           |    |    | A-B     |    |
| 7                      | Control vs. iRBC                       | -0.6852    | No           | ns         | 0.9992           |    |    | A-C     |    |
| 8                      | Control vs. LPS                        | -49.63     | Yes          | **         | 0.0054           |    |    | A-D     |    |
| 9                      | RBC vs. iRBC                           | 0.6866     | No           | ns         | 0.9992           |    |    | B-C     |    |
| 10                     | RBC vs. LPS                            | -48.26     | Yes          | **         | 0.0054           |    |    | B-D     |    |
| 11                     | iRBC vs. LPS                           | -48.95     | Yes          | **         | 0.0054           |    |    | C-D     |    |
| 12                     |                                        |            |              |            |                  |    |    |         |    |
| 13                     | Test details                           | Mean 1     | Mean 2       | Mean Diff. | SE of diff.      | n1 | n2 | t       | DF |
| 14                     | Control vs. RBC                        | 1.000      | 2.372        | -1.372     | 11.34            | 4  | 4  | 0.1210  | 12 |
| 15                     | Control vs. iRBC                       | 1.000      | 1.685        | -0.6852    | 11.34            | 4  | 4  | 0.06041 | 12 |
| 16                     | Control vs. LPS                        | 1.000      | 50.63        | -49.63     | 11.34            | 4  | 4  | 4.376   | 12 |
| 17                     | RBC vs. iRBC                           | 2.372      | 1.685        | 0.6866     | 11.34            | 4  | 4  | 0.06054 | 12 |
| 18                     | RBC vs. LPS                            | 2.372      | 50.63        | -48.26     | 11.34            | 4  | 4  | 4.255   | 12 |
| 19                     | iRBC vs. LPS                           | 1.685      | 50.63        | -48.95     | 11.34            | 4  | 4  | 4.316   | 12 |
| 20                     |                                        |            |              |            |                  |    |    |         |    |
| 21                     |                                        |            |              |            |                  |    |    |         |    |
| 22                     |                                        |            |              |            |                  |    |    |         |    |
| 23                     |                                        |            |              |            |                  |    |    |         |    |
| 24                     |                                        |            |              |            |                  |    |    |         |    |
| 25                     |                                        |            |              |            |                  |    |    |         |    |
| 26                     |                                        |            |              |            |                  |    |    |         |    |
| 27                     |                                        |            |              |            |                  |    |    |         |    |
| 28                     |                                        |            |              |            |                  |    |    |         |    |

Ordinary one-way ANOVA of Transpose of IL-1beta Row 25, Column RT

SourceDataforFigure1A

Prism 8

File Sheet Undo Clipboard Analysis Interpret Change Draw Write Text Export Print Send LA Help

12 Helvetica

Q Search

▼ Data Tables

- IL-1beta
- IL-6**
- IL-10
- TNF
- New Data Table...

▼ Info

- New Info...

▼ Results

- Transpose of IL-1beta
- Ordinary one-way ANOVA of Transpose of IL-1beta
- Transpose of IL-6**
- Friedman test of Transpose of IL-6
- Transpose of IL-10
- Ordinary one-way ANOVA of Transpose of IL-10
- Transpose of TNF
- Ordinary one-way ANOVA of Transpose of TNF
- New Analysis...

▼ Graphs

- IL-1beta
- IL-6
- IL-10
- TNF
- New Graph...

▼ Layouts

- New Layout...

Family

- IL-6
  - Transpose
  - Friedman test

| Transpose |         | A       | B     | C     | D        | E     | F     | G     | H     | I     | J     | K     | L     | M     |
|-----------|---------|---------|-------|-------|----------|-------|-------|-------|-------|-------|-------|-------|-------|-------|
|           |         | Control | RBC   | iRBC  | LPS      | Title | Title | Title | Title | Title | Title | Title | Title | Title |
| 1         | Donor 3 | 1.000   | 0.834 | 0.963 | 2328.126 | Y     | Y     | Y     | Y     | Y     | Y     | Y     | Y     | Y     |
| 2         | Donor 2 | 1.000   | 1.000 | 3.080 | 6850.260 |       |       |       |       |       |       |       |       |       |
| 3         | Donor 1 | 1.000   | 0.699 | 0.959 | 813.037  |       |       |       |       |       |       |       |       |       |
| 4         | Donor 4 | 1.000   | 5.314 | 5.442 | 991.387  |       |       |       |       |       |       |       |       |       |
| 5         |         |         |       |       |          |       |       |       |       |       |       |       |       |       |
| 6         |         |         |       |       |          |       |       |       |       |       |       |       |       |       |
| 7         |         |         |       |       |          |       |       |       |       |       |       |       |       |       |
| 8         |         |         |       |       |          |       |       |       |       |       |       |       |       |       |
| 9         |         |         |       |       |          |       |       |       |       |       |       |       |       |       |
| 10        |         |         |       |       |          |       |       |       |       |       |       |       |       |       |
| 11        |         |         |       |       |          |       |       |       |       |       |       |       |       |       |
| 12        |         |         |       |       |          |       |       |       |       |       |       |       |       |       |
| 13        |         |         |       |       |          |       |       |       |       |       |       |       |       |       |
| 14        |         |         |       |       |          |       |       |       |       |       |       |       |       |       |
| 15        |         |         |       |       |          |       |       |       |       |       |       |       |       |       |
| 16        |         |         |       |       |          |       |       |       |       |       |       |       |       |       |
| 17        |         |         |       |       |          |       |       |       |       |       |       |       |       |       |
| 18        |         |         |       |       |          |       |       |       |       |       |       |       |       |       |
| 19        |         |         |       |       |          |       |       |       |       |       |       |       |       |       |
| 20        |         |         |       |       |          |       |       |       |       |       |       |       |       |       |
| 21        |         |         |       |       |          |       |       |       |       |       |       |       |       |       |
| 22        |         |         |       |       |          |       |       |       |       |       |       |       |       |       |
| 23        |         |         |       |       |          |       |       |       |       |       |       |       |       |       |
| 24        |         |         |       |       |          |       |       |       |       |       |       |       |       |       |
| 25        |         |         |       |       |          |       |       |       |       |       |       |       |       |       |
| 26        |         |         |       |       |          |       |       |       |       |       |       |       |       |       |
| 27        |         |         |       |       |          |       |       |       |       |       |       |       |       |       |
| 28        |         |         |       |       |          |       |       |       |       |       |       |       |       |       |
| 29        |         |         |       |       |          |       |       |       |       |       |       |       |       |       |

Transpose of IL-6

Row 1, A: Control



SourceDataforFigure1A

File Sheet Undo Clipboard Analysis Interpret Change Draw Write Text Export Print Send LA Help

Prism 8

Q Search ANOVA results Multiple comparisons

▼ Data Tables

- IL-1beta
- IL-6
- IL-10
- TNF
- New Data Table...

▼ Info

- New Info...

▼ Results

- Transpose of IL-1beta
- Ordinary one-way ANOVA of Transpose of IL-1beta
- Transpose of IL-6
- Friedman test of Transpose of IL-6**
- Transpose of IL-10
- Ordinary one-way ANOVA of Transpose of IL-10
- Transpose of TNF
- Ordinary one-way ANOVA of Transpose of TNF
- New Analysis...

▼ Graphs

- IL-1beta
- IL-6
- IL-10
- TNF
- New Graph...

▼ Layouts

- New Layout...

Family

- IL-6
  - Transpose
  - Friedman test**

| Friedman test        |                                         |                       |                     |                       |                         |           |          |  |
|----------------------|-----------------------------------------|-----------------------|---------------------|-----------------------|-------------------------|-----------|----------|--|
| Multiple comparisons |                                         |                       |                     |                       |                         |           |          |  |
| 1                    | Number of families                      | 1                     |                     |                       |                         |           |          |  |
| 2                    | Number of comparisons per family        | 6                     |                     |                       |                         |           |          |  |
| 3                    | Alpha                                   | 0.05                  |                     |                       |                         |           |          |  |
| 4                    |                                         |                       |                     |                       |                         |           |          |  |
| 5                    | <b>Dunn's multiple comparisons test</b> | <b>Rank sum diff.</b> | <b>Significant?</b> | <b>Summary</b>        | <b>Adjusted P Value</b> |           |          |  |
| 6                    | Control vs. RBC                         | 3.000                 | No                  | ns                    | >0.9999                 | A-B       |          |  |
| 7                    | Control vs. iRBC                        | -1.500                | No                  | ns                    | >0.9999                 | A-C       |          |  |
| 8                    | Control vs. LPS                         | -7.500                | No                  | ns                    | 0.2399                  | A-D       |          |  |
| 9                    | RBC vs. iRBC                            | -4.500                | No                  | ns                    | >0.9999                 | B-C       |          |  |
| 10                   | RBC vs. LPS                             | -10.50                | Yes                 | *                     | 0.0242                  | B-D       |          |  |
| 11                   | iRBC vs. LPS                            | -6.000                | No                  | ns                    | 0.6021                  | C-D       |          |  |
| 12                   |                                         |                       |                     |                       |                         |           |          |  |
| 13                   | <b>Test details</b>                     | <b>Rank sum 1</b>     | <b>Rank sum 2</b>   | <b>Rank sum diff.</b> | <b>n1</b>               | <b>n2</b> | <b>Z</b> |  |
| 14                   | Control vs. RBC                         | 8.500                 | 5.500               | 3.000                 | 4                       | 4         | 0.8216   |  |
| 15                   | Control vs. iRBC                        | 8.500                 | 10.00               | -1.500                | 4                       | 4         | 0.4108   |  |
| 16                   | Control vs. LPS                         | 8.500                 | 16.00               | -7.500                | 4                       | 4         | 2.054    |  |
| 17                   | RBC vs. iRBC                            | 5.500                 | 10.00               | -4.500                | 4                       | 4         | 1.232    |  |
| 18                   | RBC vs. LPS                             | 5.500                 | 16.00               | -10.50                | 4                       | 4         | 2.876    |  |
| 19                   | iRBC vs. LPS                            | 10.00                 | 16.00               | -6.000                | 4                       | 4         | 1.643    |  |
| 20                   |                                         |                       |                     |                       |                         |           |          |  |
| 21                   |                                         |                       |                     |                       |                         |           |          |  |
| 22                   |                                         |                       |                     |                       |                         |           |          |  |
| 23                   |                                         |                       |                     |                       |                         |           |          |  |
| 24                   |                                         |                       |                     |                       |                         |           |          |  |
| 25                   |                                         |                       |                     |                       |                         |           |          |  |
| 26                   |                                         |                       |                     |                       |                         |           |          |  |
| 27                   |                                         |                       |                     |                       |                         |           |          |  |
| 28                   |                                         |                       |                     |                       |                         |           |          |  |

Friedman test of Transpose of IL-6 Row 1, Column A

SourceDataforFigure1A

File Sheet Undo Clipboard Analysis Interpret Change Draw Write Text Export Print Send LA Help

Prism 8

Q Search ANOVA results Multiple comparisons

▼ Data Tables

- IL-1beta
- IL-6
- IL-10
- TNF
- New Data Table...

▼ Info

- New Info...

▼ Results

- Transpose of IL-1beta
- Ordinary one-way ANOVA of Transpose of IL-1beta
- Transpose of IL-6
- Friedman test of Transpose of IL-6**
- Transpose of IL-10
- Ordinary one-way ANOVA of Transpose of IL-10
- Transpose of TNF
- Ordinary one-way ANOVA of Transpose of TNF
- New Analysis...

▼ Graphs

- IL-1beta
- IL-6
- IL-10
- TNF
- New Graph...

▼ Layouts

- New Layout...

Family

- IL-6
  - Transpose
  - Friedman test**

| Friedman test ANOVA results |                                         |                   |  |  |  |  |  |  |  |
|-----------------------------|-----------------------------------------|-------------------|--|--|--|--|--|--|--|
| 1                           | Table Analyzed                          | Transpose of IL-6 |  |  |  |  |  |  |  |
| 2                           |                                         |                   |  |  |  |  |  |  |  |
| 3                           | <b>Friedman test</b>                    |                   |  |  |  |  |  |  |  |
| 4                           | P value                                 | 0.0101            |  |  |  |  |  |  |  |
| 5                           | Exact or approximate P value?           | Exact             |  |  |  |  |  |  |  |
| 6                           | P value summary                         | *                 |  |  |  |  |  |  |  |
| 7                           | Are means signif. different? (P < 0.05) | Yes               |  |  |  |  |  |  |  |
| 8                           | Number of groups                        | 4                 |  |  |  |  |  |  |  |
| 9                           | Friedman statistic                      | 9.000             |  |  |  |  |  |  |  |
| 10                          |                                         |                   |  |  |  |  |  |  |  |
| 11                          | <b>Data summary</b>                     |                   |  |  |  |  |  |  |  |
| 12                          | Number of treatments (columns)          | 4                 |  |  |  |  |  |  |  |
| 13                          | Number of subjects (rows)               | 4                 |  |  |  |  |  |  |  |
| 14                          |                                         |                   |  |  |  |  |  |  |  |
| 15                          |                                         |                   |  |  |  |  |  |  |  |
| 16                          |                                         |                   |  |  |  |  |  |  |  |
| 17                          |                                         |                   |  |  |  |  |  |  |  |
| 18                          |                                         |                   |  |  |  |  |  |  |  |
| 19                          |                                         |                   |  |  |  |  |  |  |  |
| 20                          |                                         |                   |  |  |  |  |  |  |  |
| 21                          |                                         |                   |  |  |  |  |  |  |  |
| 22                          |                                         |                   |  |  |  |  |  |  |  |
| 23                          |                                         |                   |  |  |  |  |  |  |  |
| 24                          |                                         |                   |  |  |  |  |  |  |  |
| 25                          |                                         |                   |  |  |  |  |  |  |  |
| 26                          |                                         |                   |  |  |  |  |  |  |  |
| 27                          |                                         |                   |  |  |  |  |  |  |  |
| 28                          |                                         |                   |  |  |  |  |  |  |  |

Friedman test of Transpose of IL-6 Row 1, Column A

SourceDataforFigure1A

File Sheet Undo Clipboard Analysis Interpret Change Draw Write Text Export Print Send LA Help

Prism 8

Search ANOVA results Multiple comparisons

▼ Data Tables

- IL-1beta
- IL-6
- IL-10**
- TNF
- New Data Table...

▼ Info

- New Info...

▼ Results

- Transpose of IL-1beta
- Ordinary one-way ANOVA of Transpose of IL-1beta
- Transpose of IL-6
- Friedman test of Transpose of IL-6
- Transpose of IL-10**
- Ordinary one-way ANOVA of Transpose of IL-10**
- Transpose of TNF
- Ordinary one-way ANOVA of Transpose of TNF
- New Analysis...

▼ Graphs

- IL-1beta
- IL-6
- IL-10
- TNF
- New Graph...

▼ Layouts

- New Layout...

Family

- IL-10**
  - Transpose
  - Ordinary one-way ANOVA**

| Ordinary one-way ANOVA |                                             | ANOVA results      |           |           |                     |                |
|------------------------|---------------------------------------------|--------------------|-----------|-----------|---------------------|----------------|
| 1                      | Table Analyzed                              | Transpose of IL-10 |           |           |                     |                |
| 2                      | Data sets analyzed                          | A-D                |           |           |                     |                |
| 3                      |                                             |                    |           |           |                     |                |
| 4                      | <b>ANOVA summary</b>                        |                    |           |           |                     |                |
| 5                      | F                                           | 17.09              |           |           |                     |                |
| 6                      | P value                                     | 0.0001             |           |           |                     |                |
| 7                      | P value summary                             | ***                |           |           |                     |                |
| 8                      | Significant diff. among means (P < 0.05)?   | Yes                |           |           |                     |                |
| 9                      | R square                                    | 0.8103             |           |           |                     |                |
| 10                     |                                             |                    |           |           |                     |                |
| 11                     | <b>Brown-Forsythe test</b>                  |                    |           |           |                     |                |
| 12                     | F (DFn, DFd)                                | 20.17 (3, 12)      |           |           |                     |                |
| 13                     | P value                                     | <0.0001            |           |           |                     |                |
| 14                     | P value summary                             | ****               |           |           |                     |                |
| 15                     | Are SDs significantly different (P < 0.05)? | Yes                |           |           |                     |                |
| 16                     |                                             |                    |           |           |                     |                |
| 17                     | <b>Bartlett's test</b>                      |                    |           |           |                     |                |
| 18                     | Bartlett's statistic (corrected)            |                    |           |           |                     |                |
| 19                     | P value                                     |                    |           |           |                     |                |
| 20                     | P value summary                             |                    |           |           |                     |                |
| 21                     | Are SDs significantly different (P < 0.05)? |                    |           |           |                     |                |
| 22                     |                                             |                    |           |           |                     |                |
| 23                     | <b>ANOVA table</b>                          | <b>SS</b>          | <b>DF</b> | <b>MS</b> | <b>F (DFn, DFd)</b> | <b>P value</b> |
| 24                     | Treatment (between columns)                 | 12644              | 3         | 4215      | F (3, 12) = 17.09   | P=0.0001       |
| 25                     | Residual (within columns)                   | 2960               | 12        | 246.7     |                     |                |
| 26                     | Total                                       | 15603              | 15        |           |                     |                |
| 27                     |                                             |                    |           |           |                     |                |
| 28                     | <b>Data summary</b>                         |                    |           |           |                     |                |

Ordinary one-way ANOVA of Transpose of IL-10 Row 1, Column A

SourceDataforFigure1A

File Sheet Undo Clipboard Analysis Interpret Change Draw Write Text Export Print Send LA Help

Prism 8

Search ANOVA results Multiple comparisons

▼ Data Tables

- IL-1beta
- IL-6
- IL-10**
- TNF
- New Data Table...

▼ Info

- New Info...

▼ Results

- Transpose of IL-1beta
- Ordinary one-way ANOVA of Transpose of IL-1beta
- Transpose of IL-6
- Friedman test of Transpose of IL-6
- Transpose of IL-10**
- Ordinary one-way ANOVA of Transpose of IL-10
- Transpose of TNF
- Ordinary one-way ANOVA of Transpose of TNF
- New Analysis...

▼ Graphs

- IL-1beta
- IL-6
- IL-10
- TNF
- New Graph...

▼ Layouts

- New Layout...

Family

- IL-10
- Transpose
- Ordinary one-way ANOVA**

| Ordinary one-way ANOVA |                                          | Multiple comparisons |                           |                     |                    |                         |           |          |           |  |
|------------------------|------------------------------------------|----------------------|---------------------------|---------------------|--------------------|-------------------------|-----------|----------|-----------|--|
| 1                      | Number of families                       | 1                    |                           |                     |                    |                         |           |          |           |  |
| 2                      | Number of comparisons per family         | 6                    |                           |                     |                    |                         |           |          |           |  |
| 3                      | Alpha                                    | 0.05                 |                           |                     |                    |                         |           |          |           |  |
| 4                      |                                          |                      |                           |                     |                    |                         |           |          |           |  |
| 5                      | <b>Tukey's multiple comparisons test</b> | <b>Mean Diff.</b>    | <b>95.00% CI of diff.</b> | <b>Significant?</b> | <b>Summary</b>     | <b>Adjusted P Value</b> |           |          |           |  |
| 6                      | Control vs. RBC                          | -0.4050              | -33.38 to 32.57           | No                  | ns                 | >0.9999                 |           |          | A-B       |  |
| 7                      | Control vs. iRBC                         | -1.062               | -34.03 to 31.91           | No                  | ns                 | 0.9997                  |           |          | A-C       |  |
| 8                      | Control vs. LPS                          | -65.40               | -98.37 to -32.43          | Yes                 | ***                | 0.0004                  |           |          | A-D       |  |
| 9                      | RBC vs. iRBC                             | -0.6574              | -33.63 to 32.31           | No                  | ns                 | >0.9999                 |           |          | B-C       |  |
| 10                     | RBC vs. LPS                              | -65.00               | -97.97 to -32.03          | Yes                 | ***                | 0.0004                  |           |          | B-D       |  |
| 11                     | iRBC vs. LPS                             | -64.34               | -97.31 to -31.37          | Yes                 | ***                | 0.0004                  |           |          | C-D       |  |
| 12                     |                                          |                      |                           |                     |                    |                         |           |          |           |  |
| 13                     | <b>Test details</b>                      | <b>Mean 1</b>        | <b>Mean 2</b>             | <b>Mean Diff.</b>   | <b>SE of diff.</b> | <b>n1</b>               | <b>n2</b> | <b>q</b> | <b>DF</b> |  |
| 14                     | Control vs. RBC                          | 1.000                | 1.405                     | -0.4050             | 11.11              | 4                       | 4         | 0.05157  | 12        |  |
| 15                     | Control vs. iRBC                         | 1.000                | 2.062                     | -1.062              | 11.11              | 4                       | 4         | 0.1353   | 12        |  |
| 16                     | Control vs. LPS                          | 1.000                | 66.40                     | -65.40              | 11.11              | 4                       | 4         | 8.329    | 12        |  |
| 17                     | RBC vs. iRBC                             | 1.405                | 2.062                     | -0.6574             | 11.11              | 4                       | 4         | 0.08372  | 12        |  |
| 18                     | RBC vs. LPS                              | 1.405                | 66.40                     | -65.00              | 11.11              | 4                       | 4         | 8.277    | 12        |  |
| 19                     | iRBC vs. LPS                             | 2.062                | 66.40                     | -64.34              | 11.11              | 4                       | 4         | 8.193    | 12        |  |
| 20                     |                                          |                      |                           |                     |                    |                         |           |          |           |  |
| 21                     |                                          |                      |                           |                     |                    |                         |           |          |           |  |
| 22                     |                                          |                      |                           |                     |                    |                         |           |          |           |  |
| 23                     |                                          |                      |                           |                     |                    |                         |           |          |           |  |
| 24                     |                                          |                      |                           |                     |                    |                         |           |          |           |  |
| 25                     |                                          |                      |                           |                     |                    |                         |           |          |           |  |
| 26                     |                                          |                      |                           |                     |                    |                         |           |          |           |  |
| 27                     |                                          |                      |                           |                     |                    |                         |           |          |           |  |
| 28                     |                                          |                      |                           |                     |                    |                         |           |          |           |  |

Ordinary one-way ANOVA of Transpose of IL-10 Row 1, Column A

SourceDataforFigure1A

Prism 8

File Sheet Undo Clipboard Analysis Interpret Change Draw Write Text Export Print Send LA Help

12 Helvetica

Search

▼ Data Tables

- IL-1beta
- IL-6
- IL-10
- TNF
- New Data Table...

▼ Info

- New Info...

▼ Results

- Transpose of IL-1beta
- Ordinary one-way ANOVA of Transpose of IL-1beta
- Transpose of IL-6
- Friedman test of Transpose of IL-6
- Transpose of IL-10
- Ordinary one-way ANOVA of Transpose of IL-10
- Transpose of TNF**
- Ordinary one-way ANOVA of Transpose of TNF
- New Analysis...

▼ Graphs

- IL-1beta
- IL-6
- IL-10
- TNF
- New Graph...

▼ Layouts

- New Layout...

Family

- TNF
  - Transpose
  - Ordinary one-way ANOVA

| Transpose |         | A       | B     | C     | D        | E     | F     | G     | H     | I     | J     | K     | L     | M     |
|-----------|---------|---------|-------|-------|----------|-------|-------|-------|-------|-------|-------|-------|-------|-------|
|           |         | Control | RBC   | iRBC  | LPS      | Title | Title | Title | Title | Title | Title | Title | Title | Title |
| 1         | Donor 3 | 1.000   | 0.652 | 3.468 | 789.661  | Y     | Y     | Y     | Y     | Y     | Y     | Y     | Y     | Y     |
| 2         | Donor 2 | 1.000   | 3.017 | 6.785 | 1455.105 |       |       |       |       |       |       |       |       |       |
| 3         | Donor 1 | 1.000   | 0.962 | 6.992 | 308.201  |       |       |       |       |       |       |       |       |       |
| 4         | Donor 4 | 1.000   | 2.032 | 2.445 | 55.279   |       |       |       |       |       |       |       |       |       |
| 5         |         |         |       |       |          |       |       |       |       |       |       |       |       |       |
| 6         |         |         |       |       |          |       |       |       |       |       |       |       |       |       |
| 7         |         |         |       |       |          |       |       |       |       |       |       |       |       |       |
| 8         |         |         |       |       |          |       |       |       |       |       |       |       |       |       |
| 9         |         |         |       |       |          |       |       |       |       |       |       |       |       |       |
| 10        |         |         |       |       |          |       |       |       |       |       |       |       |       |       |
| 11        |         |         |       |       |          |       |       |       |       |       |       |       |       |       |
| 12        |         |         |       |       |          |       |       |       |       |       |       |       |       |       |
| 13        |         |         |       |       |          |       |       |       |       |       |       |       |       |       |
| 14        |         |         |       |       |          |       |       |       |       |       |       |       |       |       |
| 15        |         |         |       |       |          |       |       |       |       |       |       |       |       |       |
| 16        |         |         |       |       |          |       |       |       |       |       |       |       |       |       |
| 17        |         |         |       |       |          |       |       |       |       |       |       |       |       |       |
| 18        |         |         |       |       |          |       |       |       |       |       |       |       |       |       |
| 19        |         |         |       |       |          |       |       |       |       |       |       |       |       |       |
| 20        |         |         |       |       |          |       |       |       |       |       |       |       |       |       |
| 21        |         |         |       |       |          |       |       |       |       |       |       |       |       |       |
| 22        |         |         |       |       |          |       |       |       |       |       |       |       |       |       |
| 23        |         |         |       |       |          |       |       |       |       |       |       |       |       |       |
| 24        |         |         |       |       |          |       |       |       |       |       |       |       |       |       |
| 25        |         |         |       |       |          |       |       |       |       |       |       |       |       |       |
| 26        |         |         |       |       |          |       |       |       |       |       |       |       |       |       |
| 27        |         |         |       |       |          |       |       |       |       |       |       |       |       |       |
| 28        |         |         |       |       |          |       |       |       |       |       |       |       |       |       |
| 29        |         |         |       |       |          |       |       |       |       |       |       |       |       |       |

Transpose of TNF

Row 1, A: Control

SourceDataforFigure1A

Prism 8

File Sheet Undo Clipboard Analysis Interpret Change Draw Write Text Export Print Send LA Help

12 Helvetica

Search

▼ Data Tables

- IL-1beta
- IL-6
- IL-10**
- TNF
- New Data Table...

▼ Info

- New Info...

▼ Results

- Transpose of IL-1beta
- Ordinary one-way ANOVA of Transpose of IL-1beta
- Transpose of IL-6
- Friedman test of Transpose of IL-6
- Transpose of IL-10**
- Ordinary one-way ANOVA of Transpose of IL-10
- Transpose of TNF
- Ordinary one-way ANOVA of Transpose of TNF
- New Analysis...

▼ Graphs

- IL-1beta
- IL-6
- IL-10
- TNF
- New Graph...

▼ Layouts

- New Layout...

Family

- IL-10
  - Transpose
  - Ordinary one-way ANOVA

| Transpose |         | A       | B     | C     | D       | E     | F     | G     | H     | I     | J     | K     | L     | M     |
|-----------|---------|---------|-------|-------|---------|-------|-------|-------|-------|-------|-------|-------|-------|-------|
|           |         | Control | RBC   | iRBC  | LPS     | Title | Title | Title | Title | Title | Title | Title | Title | Title |
| 1         | Donor 3 | 1.000   | 1.727 | 1.409 | 80.273  | Y     | Y     | Y     | Y     | Y     | Y     | Y     | Y     | Y     |
| 2         | Donor 2 | 1.000   | 1.000 | 1.040 | 46.610  |       |       |       |       |       |       |       |       |       |
| 3         | Donor 1 | 1.000   | 0.822 | 3.083 | 35.055  |       |       |       |       |       |       |       |       |       |
| 4         | Donor 4 | 1.000   | 2.071 | 2.717 | 103.673 |       |       |       |       |       |       |       |       |       |
| 5         |         |         |       |       |         |       |       |       |       |       |       |       |       |       |
| 6         |         |         |       |       |         |       |       |       |       |       |       |       |       |       |
| 7         |         |         |       |       |         |       |       |       |       |       |       |       |       |       |
| 8         |         |         |       |       |         |       |       |       |       |       |       |       |       |       |
| 9         |         |         |       |       |         |       |       |       |       |       |       |       |       |       |
| 10        |         |         |       |       |         |       |       |       |       |       |       |       |       |       |
| 11        |         |         |       |       |         |       |       |       |       |       |       |       |       |       |
| 12        |         |         |       |       |         |       |       |       |       |       |       |       |       |       |
| 13        |         |         |       |       |         |       |       |       |       |       |       |       |       |       |
| 14        |         |         |       |       |         |       |       |       |       |       |       |       |       |       |
| 15        |         |         |       |       |         |       |       |       |       |       |       |       |       |       |
| 16        |         |         |       |       |         |       |       |       |       |       |       |       |       |       |
| 17        |         |         |       |       |         |       |       |       |       |       |       |       |       |       |
| 18        |         |         |       |       |         |       |       |       |       |       |       |       |       |       |
| 19        |         |         |       |       |         |       |       |       |       |       |       |       |       |       |
| 20        |         |         |       |       |         |       |       |       |       |       |       |       |       |       |
| 21        |         |         |       |       |         |       |       |       |       |       |       |       |       |       |
| 22        |         |         |       |       |         |       |       |       |       |       |       |       |       |       |
| 23        |         |         |       |       |         |       |       |       |       |       |       |       |       |       |
| 24        |         |         |       |       |         |       |       |       |       |       |       |       |       |       |
| 25        |         |         |       |       |         |       |       |       |       |       |       |       |       |       |
| 26        |         |         |       |       |         |       |       |       |       |       |       |       |       |       |
| 27        |         |         |       |       |         |       |       |       |       |       |       |       |       |       |
| 28        |         |         |       |       |         |       |       |       |       |       |       |       |       |       |
| 29        |         |         |       |       |         |       |       |       |       |       |       |       |       |       |

Transpose of IL-10

Row 1, A: Control

SourceDataforFigure1A

File Sheet Undo Clipboard Analysis Interpret Change Draw Write Text Export Print Send LA Help

Prism 8

Search ANOVA results Multiple comparisons

▼ Data Tables

- IL-1beta
- IL-6
- IL-10
- TNF
- New Data Table...

▼ Info

- New Info...

▼ Results

- Transpose of IL-1beta
- Ordinary one-way ANOVA of Transpose of IL-1beta
- Transpose of IL-6
- Friedman test of Transpose of IL-6
- Transpose of IL-10
- Ordinary one-way ANOVA of Transpose of IL-10
- Transpose of TNF
- Ordinary one-way ANOVA of Transpose of TNF**
- New Analysis...

▼ Graphs

- IL-1beta
- IL-6
- IL-10
- TNF
- New Graph...

▼ Layouts

- New Layout...

Family

- TNF
- Transpose
- Ordinary one-way ANOVA**

| Ordinary one-way ANOVA |                                          | Multiple comparisons |                           |                     |                    |                         |           |          |           |
|------------------------|------------------------------------------|----------------------|---------------------------|---------------------|--------------------|-------------------------|-----------|----------|-----------|
| 1                      | Number of families                       | 1                    |                           |                     |                    |                         |           |          |           |
| 2                      | Number of comparisons per family         | 6                    |                           |                     |                    |                         |           |          |           |
| 3                      | Alpha                                    | 0.05                 |                           |                     |                    |                         |           |          |           |
| 4                      |                                          |                      |                           |                     |                    |                         |           |          |           |
| 5                      | <b>Tukey's multiple comparisons test</b> | <b>Mean Diff.</b>    | <b>95.00% CI of diff.</b> | <b>Significant?</b> | <b>Summary</b>     | <b>Adjusted P Value</b> |           |          |           |
| 6                      | Control vs. RBC                          | -0.6657              | -647.2 to 645.9           | No                  | ns                 | >0.9999                 |           | A-B      |           |
| 7                      | Control vs. iRBC                         | -3.923               | -650.5 to 642.6           | No                  | ns                 | >0.9999                 |           | A-C      |           |
| 8                      | Control vs. LPS                          | -651.1               | -1298 to -4.509           | Yes                 | *                  | 0.0482                  |           | A-D      |           |
| 9                      | RBC vs. iRBC                             | -3.257               | -649.8 to 643.3           | No                  | ns                 | >0.9999                 |           | B-C      |           |
| 10                     | RBC vs. LPS                              | -650.4               | -1297 to -3.844           | Yes                 | *                  | 0.0485                  |           | B-D      |           |
| 11                     | iRBC vs. LPS                             | -647.1               | -1294 to -0.5867          | Yes                 | *                  | 0.0498                  |           | C-D      |           |
| 12                     |                                          |                      |                           |                     |                    |                         |           |          |           |
| 13                     | <b>Test details</b>                      | <b>Mean 1</b>        | <b>Mean 2</b>             | <b>Mean Diff.</b>   | <b>SE of diff.</b> | <b>n1</b>               | <b>n2</b> | <b>q</b> | <b>DF</b> |
| 14                     | Control vs. RBC                          | 1.000                | 1.666                     | -0.6657             | 217.8              | 4                       | 4         | 0.004323 | 12        |
| 15                     | Control vs. iRBC                         | 1.000                | 4.923                     | -3.923              | 217.8              | 4                       | 4         | 0.02547  | 12        |
| 16                     | Control vs. LPS                          | 1.000                | 652.1                     | -651.1              | 217.8              | 4                       | 4         | 4.228    | 12        |
| 17                     | RBC vs. iRBC                             | 1.666                | 4.923                     | -3.257              | 217.8              | 4                       | 4         | 0.02115  | 12        |
| 18                     | RBC vs. LPS                              | 1.666                | 652.1                     | -650.4              | 217.8              | 4                       | 4         | 4.224    | 12        |
| 19                     | iRBC vs. LPS                             | 4.923                | 652.1                     | -647.1              | 217.8              | 4                       | 4         | 4.202    | 12        |
| 20                     |                                          |                      |                           |                     |                    |                         |           |          |           |
| 21                     |                                          |                      |                           |                     |                    |                         |           |          |           |
| 22                     |                                          |                      |                           |                     |                    |                         |           |          |           |
| 23                     |                                          |                      |                           |                     |                    |                         |           |          |           |
| 24                     |                                          |                      |                           |                     |                    |                         |           |          |           |
| 25                     |                                          |                      |                           |                     |                    |                         |           |          |           |
| 26                     |                                          |                      |                           |                     |                    |                         |           |          |           |
| 27                     |                                          |                      |                           |                     |                    |                         |           |          |           |
| 28                     |                                          |                      |                           |                     |                    |                         |           |          |           |

Ordinary one-way ANOVA of Transpose of TNF Row 1, Column A

SourceDataforFigure1A

File Sheet Undo Clipboard Analysis Interpret Change Draw Write Text Export Print Send LA Help

Prism 8

Search ANOVA results Multiple comparisons

▼ Data Tables

- IL-1beta
- IL-6
- IL-10
- TNF
- New Data Table...

▼ Info

- New Info...

▼ Results

- Transpose of IL-1beta
- Ordinary one-way ANOVA of Transpose of IL-1beta
- Transpose of IL-6
- Friedman test of Transpose of IL-6
- Transpose of IL-10
- Ordinary one-way ANOVA of Transpose of IL-10
- Transpose of TNF
- Ordinary one-way ANOVA of Transpose of TNF**
- New Analysis...

▼ Graphs

- IL-1beta
- IL-6
- IL-10
- TNF
- New Graph...

▼ Layouts

- New Layout...

Family

- TNF
- Transpose
- Ordinary one-way ANOVA**

| Ordinary one-way ANOVA |                                             | ANOVA results    |           |           |                     |                |
|------------------------|---------------------------------------------|------------------|-----------|-----------|---------------------|----------------|
| 1                      | Table Analyzed                              | Transpose of TNF |           |           |                     |                |
| 2                      | Data sets analyzed                          | A-D              |           |           |                     |                |
| 3                      |                                             |                  |           |           |                     |                |
| 4                      | <b>ANOVA summary</b>                        |                  |           |           |                     |                |
| 5                      | F                                           | 4.448            |           |           |                     |                |
| 6                      | P value                                     | 0.0254           |           |           |                     |                |
| 7                      | P value summary                             | *                |           |           |                     |                |
| 8                      | Significant diff. among means (P < 0.05)?   | Yes              |           |           |                     |                |
| 9                      | R square                                    | 0.5265           |           |           |                     |                |
| 10                     |                                             |                  |           |           |                     |                |
| 11                     | <b>Brown-Forsythe test</b>                  |                  |           |           |                     |                |
| 12                     | F (DFn, DFd)                                | 8.934 (3, 12)    |           |           |                     |                |
| 13                     | P value                                     | 0.0022           |           |           |                     |                |
| 14                     | P value summary                             | **               |           |           |                     |                |
| 15                     | Are SDs significantly different (P < 0.05)? | Yes              |           |           |                     |                |
| 16                     |                                             |                  |           |           |                     |                |
| 17                     | <b>Bartlett's test</b>                      |                  |           |           |                     |                |
| 18                     | Bartlett's statistic (corrected)            |                  |           |           |                     |                |
| 19                     | P value                                     |                  |           |           |                     |                |
| 20                     | P value summary                             |                  |           |           |                     |                |
| 21                     | Are SDs significantly different (P < 0.05)? |                  |           |           |                     |                |
| 22                     |                                             |                  |           |           |                     |                |
| 23                     | <b>ANOVA table</b>                          | <b>SS</b>        | <b>DF</b> | <b>MS</b> | <b>F (DFn, DFd)</b> | <b>P value</b> |
| 24                     | Treatment (between columns)                 | 1265710          | 3         | 421903    | F (3, 12) = 4.448   | P=0.0254       |
| 25                     | Residual (within columns)                   | 1138221          | 12        | 94852     |                     |                |
| 26                     | Total                                       | 2403932          | 15        |           |                     |                |
| 27                     |                                             |                  |           |           |                     |                |
| 28                     | <b>Data summary</b>                         |                  |           |           |                     |                |

Ordinary one-way ANOVA of Transpose of TNF Row 1, Column A



SourceDataforFigure1B

File Sheet Undo Clipboard Analysis Change Import Draw Write Text Export Print Send LA Help

Prism 8

Restrict: Sheet is Any

Table format: Grouped

|    |         | Group A | Group B | Group C | Group D | Group E | Group F | Group G | Group H | Group I | Group J | Group K | Group L |
|----|---------|---------|---------|---------|---------|---------|---------|---------|---------|---------|---------|---------|---------|
|    |         | Donor 2 | Donor 1 | Donor 3 | Donor 4 | Donor 5 | Donor 6 | Title   | Title   | Title   | Title   | Title   | Title   |
| 1  | Control | Y       | Y       | Y       | Y       | Y       | Y       | Y       | Y       | Y       | Y       | Y       | Y       |
| 2  | RBCL    | 1.00    | 1.00    | 1.00    | 1.00    | 1.00    | 1.00    |         |         |         |         |         |         |
| 3  | iRBCL   | 1.00    | 1.00    | 1.00    | 1.00    | 1.00    | 1.00    |         |         |         |         |         |         |
| 4  | LPS     | 60.03   | 35.81   | 31.82   | 20.48   | 19.94   | 6.03    |         |         |         |         |         |         |
| 5  | Title   |         |         |         |         |         |         |         |         |         |         |         |         |
| 6  | Title   |         |         |         |         |         |         |         |         |         |         |         |         |
| 7  | Title   |         |         |         |         |         |         |         |         |         |         |         |         |
| 8  | Title   |         |         |         |         |         |         |         |         |         |         |         |         |
| 9  | Title   |         |         |         |         |         |         |         |         |         |         |         |         |
| 10 | Title   |         |         |         |         |         |         |         |         |         |         |         |         |
| 11 | Title   |         |         |         |         |         |         |         |         |         |         |         |         |
| 12 | Title   |         |         |         |         |         |         |         |         |         |         |         |         |
| 13 | Title   |         |         |         |         |         |         |         |         |         |         |         |         |
| 14 | Title   |         |         |         |         |         |         |         |         |         |         |         |         |
| 15 | Title   |         |         |         |         |         |         |         |         |         |         |         |         |
| 16 | Title   |         |         |         |         |         |         |         |         |         |         |         |         |
| 17 | Title   |         |         |         |         |         |         |         |         |         |         |         |         |
| 18 | Title   |         |         |         |         |         |         |         |         |         |         |         |         |
| 19 | Title   |         |         |         |         |         |         |         |         |         |         |         |         |
| 20 | Title   |         |         |         |         |         |         |         |         |         |         |         |         |
| 21 | Title   |         |         |         |         |         |         |         |         |         |         |         |         |
| 22 | Title   |         |         |         |         |         |         |         |         |         |         |         |         |
| 23 | Title   |         |         |         |         |         |         |         |         |         |         |         |         |
| 24 | Title   |         |         |         |         |         |         |         |         |         |         |         |         |
| 25 | Title   |         |         |         |         |         |         |         |         |         |         |         |         |
| 26 | Title   |         |         |         |         |         |         |         |         |         |         |         |         |
| 27 | Title   |         |         |         |         |         |         |         |         |         |         |         |         |
| 28 | Title   |         |         |         |         |         |         |         |         |         |         |         |         |
| 29 | Title   |         |         |         |         |         |         |         |         |         |         |         |         |

Family

- IL-1beta
  - Transpose
  - Ordinary one-way ANOVA
- IL-1beta

IL-1beta

Row 1, Column RT

SourceDataforFigure1B

File Sheet Undo Clipboard Analysis Change Import Draw Write Text Export Print Send LA Help

Prism 8

Restrict: Sheet is Any

Table format: Grouped

|    |         | Group A     | Group B   | Group C | Group D  | Group E | Group F | Group G | Group H | Group I | Group J | Group K | Group L |
|----|---------|-------------|-----------|---------|----------|---------|---------|---------|---------|---------|---------|---------|---------|
|    |         | Donor 2     | Donor 1   | Donor 3 | Donor 4  | Donor 5 | Donor 6 | Title   | Title   | Title   | Title   | Title   | Title   |
| 1  | Control | 1.000000    | 1.000000  | 1.00    | 1.00     | 1.00    | 1.00    | Y       | Y       | Y       | Y       | Y       | Y       |
| 2  | RBCL    | 0.756972    | 0.014514  | 5.51    | 19.45    | 1.00    | 1.00    |         |         |         |         |         |         |
| 3  | iRBCL   | 1.000000    | 0.014514  | 1.00    | 12.28    | 5.64    | 9.38    |         |         |         |         |         |         |
| 4  | LPS     | 6109.482000 | 80.531200 | 5448.73 | 10896.21 | 3265.93 | 5290.13 |         |         |         |         |         |         |
| 5  | Title   |             |           |         |          |         |         |         |         |         |         |         |         |
| 6  | Title   |             |           |         |          |         |         |         |         |         |         |         |         |
| 7  | Title   |             |           |         |          |         |         |         |         |         |         |         |         |
| 8  | Title   |             |           |         |          |         |         |         |         |         |         |         |         |
| 9  | Title   |             |           |         |          |         |         |         |         |         |         |         |         |
| 10 | Title   |             |           |         |          |         |         |         |         |         |         |         |         |
| 11 | Title   |             |           |         |          |         |         |         |         |         |         |         |         |
| 12 | Title   |             |           |         |          |         |         |         |         |         |         |         |         |
| 13 | Title   |             |           |         |          |         |         |         |         |         |         |         |         |
| 14 | Title   |             |           |         |          |         |         |         |         |         |         |         |         |
| 15 | Title   |             |           |         |          |         |         |         |         |         |         |         |         |
| 16 | Title   |             |           |         |          |         |         |         |         |         |         |         |         |
| 17 | Title   |             |           |         |          |         |         |         |         |         |         |         |         |
| 18 | Title   |             |           |         |          |         |         |         |         |         |         |         |         |
| 19 | Title   |             |           |         |          |         |         |         |         |         |         |         |         |
| 20 | Title   |             |           |         |          |         |         |         |         |         |         |         |         |
| 21 | Title   |             |           |         |          |         |         |         |         |         |         |         |         |
| 22 | Title   |             |           |         |          |         |         |         |         |         |         |         |         |
| 23 | Title   |             |           |         |          |         |         |         |         |         |         |         |         |
| 24 | Title   |             |           |         |          |         |         |         |         |         |         |         |         |
| 25 | Title   |             |           |         |          |         |         |         |         |         |         |         |         |
| 26 | Title   |             |           |         |          |         |         |         |         |         |         |         |         |
| 27 | Title   |             |           |         |          |         |         |         |         |         |         |         |         |
| 28 | Title   |             |           |         |          |         |         |         |         |         |         |         |         |
| 29 | Title   |             |           |         |          |         |         |         |         |         |         |         |         |

Family

- IL-6
  - Transpose
  - Ordinary one-way ANOVA
- IL-6

Row 1, Column RT

SourceDataforFigure1B

Prism 8

File Sheet Undo Clipboard Analysis Change Import Draw Write Text Export Print Send LA Help

Restrict: Sheet is Any

Table format: Grouped

|    |         | Group A   | Group B   | Group C | Group D | Group E | Group F | Group G | Group H | Group I | Group J | Group K | Group L |
|----|---------|-----------|-----------|---------|---------|---------|---------|---------|---------|---------|---------|---------|---------|
|    |         | Donor 2   | Donor 1   | Donor 3 | Donor 4 | Donor 5 | Donor 6 | Title   | Title   | Title   | Title   | Title   | Title   |
| 1  | Control | 1.000000  | 1.000000  | 1.00    | 1.00    | 1.00    | 1.00    | Y       | Y       | Y       | Y       | Y       | Y       |
| 2  | RBCL    | 0.864516  | 0.271739  | 1.00    | 2.51    | 1.00    | 1.00    |         |         |         |         |         |         |
| 3  | iRBCL   | 1.135484  | 0.739130  | 1.00    | 2.41    | 1.00    | 2.08    |         |         |         |         |         |         |
| 4  | LPS     | 19.187100 | 34.331520 | 62.09   | 35.26   | 4.92    | 13.71   |         |         |         |         |         |         |
| 5  | Title   |           |           |         |         |         |         |         |         |         |         |         |         |
| 6  | Title   |           |           |         |         |         |         |         |         |         |         |         |         |
| 7  | Title   |           |           |         |         |         |         |         |         |         |         |         |         |
| 8  | Title   |           |           |         |         |         |         |         |         |         |         |         |         |
| 9  | Title   |           |           |         |         |         |         |         |         |         |         |         |         |
| 10 | Title   |           |           |         |         |         |         |         |         |         |         |         |         |
| 11 | Title   |           |           |         |         |         |         |         |         |         |         |         |         |
| 12 | Title   |           |           |         |         |         |         |         |         |         |         |         |         |
| 13 | Title   |           |           |         |         |         |         |         |         |         |         |         |         |
| 14 | Title   |           |           |         |         |         |         |         |         |         |         |         |         |
| 15 | Title   |           |           |         |         |         |         |         |         |         |         |         |         |
| 16 | Title   |           |           |         |         |         |         |         |         |         |         |         |         |
| 17 | Title   |           |           |         |         |         |         |         |         |         |         |         |         |
| 18 | Title   |           |           |         |         |         |         |         |         |         |         |         |         |
| 19 | Title   |           |           |         |         |         |         |         |         |         |         |         |         |
| 20 | Title   |           |           |         |         |         |         |         |         |         |         |         |         |
| 21 | Title   |           |           |         |         |         |         |         |         |         |         |         |         |
| 22 | Title   |           |           |         |         |         |         |         |         |         |         |         |         |
| 23 | Title   |           |           |         |         |         |         |         |         |         |         |         |         |
| 24 | Title   |           |           |         |         |         |         |         |         |         |         |         |         |
| 25 | Title   |           |           |         |         |         |         |         |         |         |         |         |         |
| 26 | Title   |           |           |         |         |         |         |         |         |         |         |         |         |
| 27 | Title   |           |           |         |         |         |         |         |         |         |         |         |         |
| 28 | Title   |           |           |         |         |         |         |         |         |         |         |         |         |
| 29 | Title   |           |           |         |         |         |         |         |         |         |         |         |         |

Family

- IL-10
  - Transpose
  - Ordinary one-way ANOVA
- IL-10

IL-10

Row 1, Column RT

SourceDataforFigure1B

File Sheet Undo Clipboard Analysis Change Import Draw Write Text Export Print Send LA Help

Prism8

Restrict: Sheet is Any

Table format: Grouped

|    |         | Group A    | Group B   | Group C    | Group D    | Group E | Group F | Group G | Group H | Group I | Group J | Group K | Group L |
|----|---------|------------|-----------|------------|------------|---------|---------|---------|---------|---------|---------|---------|---------|
|    |         | Donor 2    | Donor 1   | Donor 3    | Donor 4    | Donor 5 | Donor 6 | Title   | Title   | Title   | Title   | Title   | Title   |
| 1  | Control | 1.000000   | 1.000000  | 1.000000   | 1.000000   | 1.00    | 1.00    | Y       | Y       | Y       | Y       | Y       | Y       |
| 2  | RBCL    | 1.954295   | 0.011088  | 1.646809   | 3.805310   | 1.00    | 2.99    |         |         |         |         |         |         |
| 3  | iRBCL   | 2.092987   | 0.662379  | 3.910638   | 3.094395   | 10.43   | 10.30   |         |         |         |         |         |         |
| 4  | LPS     | 998.412900 | 14.629120 | 578.387200 | 888.811200 | 667.56  | 1372.37 |         |         |         |         |         |         |
| 5  | Title   |            |           |            |            |         |         |         |         |         |         |         |         |
| 6  | Title   |            |           |            |            |         |         |         |         |         |         |         |         |
| 7  | Title   |            |           |            |            |         |         |         |         |         |         |         |         |
| 8  | Title   |            |           |            |            |         |         |         |         |         |         |         |         |
| 9  | Title   |            |           |            |            |         |         |         |         |         |         |         |         |
| 10 | Title   |            |           |            |            |         |         |         |         |         |         |         |         |
| 11 | Title   |            |           |            |            |         |         |         |         |         |         |         |         |
| 12 | Title   |            |           |            |            |         |         |         |         |         |         |         |         |
| 13 | Title   |            |           |            |            |         |         |         |         |         |         |         |         |
| 14 | Title   |            |           |            |            |         |         |         |         |         |         |         |         |
| 15 | Title   |            |           |            |            |         |         |         |         |         |         |         |         |
| 16 | Title   |            |           |            |            |         |         |         |         |         |         |         |         |
| 17 | Title   |            |           |            |            |         |         |         |         |         |         |         |         |
| 18 | Title   |            |           |            |            |         |         |         |         |         |         |         |         |
| 19 | Title   |            |           |            |            |         |         |         |         |         |         |         |         |
| 20 | Title   |            |           |            |            |         |         |         |         |         |         |         |         |
| 21 | Title   |            |           |            |            |         |         |         |         |         |         |         |         |
| 22 | Title   |            |           |            |            |         |         |         |         |         |         |         |         |
| 23 | Title   |            |           |            |            |         |         |         |         |         |         |         |         |
| 24 | Title   |            |           |            |            |         |         |         |         |         |         |         |         |
| 25 | Title   |            |           |            |            |         |         |         |         |         |         |         |         |
| 26 | Title   |            |           |            |            |         |         |         |         |         |         |         |         |
| 27 | Title   |            |           |            |            |         |         |         |         |         |         |         |         |
| 28 | Title   |            |           |            |            |         |         |         |         |         |         |         |         |
| 29 | Title   |            |           |            |            |         |         |         |         |         |         |         |         |

Family

- TNF
  - Transpose
  - Ordinary one-way ANOVA
- TNF

Row 1, Column RT

SourceDataforFigure1B

File Sheet Undo Clipboard Analysis Interpret Change Draw Write Text Export Print Send LA Help

Prism8

Restrict: Sheet is Any

▼ Data Tables

- IL-1beta
- IL-6
- IL-10
- TNF
- New Data Table...

▼ Info

- Project info 1
- Project info 1
- New Info...

▼ Results

- Transpose of IL-1beta
- Ordinary one-way ANOVA of Transpose of IL-1beta
- Transpose of IL-6
- Ordinary one-way ANOVA of Transpose of IL-6
- Transpose of IL-10
- Ordinary one-way ANOVA of Transpose of IL-10

Family

- IL-1beta
- Transpose
- Ordinary one-way ANOVA

| Transpose |         | A       | B     | C     | D      | E     | F     | G     | H     | I     | J     | K     | L     |
|-----------|---------|---------|-------|-------|--------|-------|-------|-------|-------|-------|-------|-------|-------|
|           |         | Control | RBCL  | IRBCL | LPS    | Title | Title | Title | Title | Title | Title | Title | Title |
|           |         | Y       | Y     | Y     | Y      | Y     | Y     | Y     | Y     | Y     | Y     | Y     | Y     |
| 1         | Donor 2 | 1.000   | 1.000 | 1.000 | 60.030 |       |       |       |       |       |       |       |       |
| 2         | Donor 1 | 1.000   | 1.000 | 1.000 | 35.810 |       |       |       |       |       |       |       |       |
| 3         | Donor 3 | 1.000   | 1.000 | 1.000 | 31.820 |       |       |       |       |       |       |       |       |
| 4         | Donor 4 | 1.000   | 1.000 | 1.000 | 20.480 |       |       |       |       |       |       |       |       |
| 5         | Donor 5 | 1.000   | 1.000 | 1.000 | 19.940 |       |       |       |       |       |       |       |       |
| 6         | Donor 6 | 1.000   | 1.000 | 1.000 | 6.030  |       |       |       |       |       |       |       |       |
| 7         |         |         |       |       |        |       |       |       |       |       |       |       |       |
| 8         |         |         |       |       |        |       |       |       |       |       |       |       |       |
| 9         |         |         |       |       |        |       |       |       |       |       |       |       |       |
| 10        |         |         |       |       |        |       |       |       |       |       |       |       |       |
| 11        |         |         |       |       |        |       |       |       |       |       |       |       |       |
| 12        |         |         |       |       |        |       |       |       |       |       |       |       |       |
| 13        |         |         |       |       |        |       |       |       |       |       |       |       |       |
| 14        |         |         |       |       |        |       |       |       |       |       |       |       |       |
| 15        |         |         |       |       |        |       |       |       |       |       |       |       |       |
| 16        |         |         |       |       |        |       |       |       |       |       |       |       |       |
| 17        |         |         |       |       |        |       |       |       |       |       |       |       |       |
| 18        |         |         |       |       |        |       |       |       |       |       |       |       |       |
| 19        |         |         |       |       |        |       |       |       |       |       |       |       |       |
| 20        |         |         |       |       |        |       |       |       |       |       |       |       |       |
| 21        |         |         |       |       |        |       |       |       |       |       |       |       |       |
| 22        |         |         |       |       |        |       |       |       |       |       |       |       |       |
| 23        |         |         |       |       |        |       |       |       |       |       |       |       |       |
| 24        |         |         |       |       |        |       |       |       |       |       |       |       |       |
| 25        |         |         |       |       |        |       |       |       |       |       |       |       |       |
| 26        |         |         |       |       |        |       |       |       |       |       |       |       |       |
| 27        |         |         |       |       |        |       |       |       |       |       |       |       |       |
| 28        |         |         |       |       |        |       |       |       |       |       |       |       |       |
| 29        |         |         |       |       |        |       |       |       |       |       |       |       |       |

Transpose of IL-1beta

Row 1, Column RT

SourceDataforFigure1B

File Sheet Undo Clipboard Analysis Interpret Change Draw Write Text Export Print Send LA Help

Prism 8

ANOVA results Multiple comparisons

Restrict: Sheet is Any

Data Tables

- IL-1beta
- IL-6
- IL-10
- TNF
- New Data Table...

Info

- Project info 1
- Project info 1
- New Info...

Results

- Transpose of IL-1beta
- Ordinary one-way ANOVA of Transpose of IL-1beta**
- Transpose of IL-6
- Ordinary one-way ANOVA of Transpose of IL-6
- Transpose of IL-10
- Ordinary one-way ANOVA of Transpose of IL-10

Family

- IL-1beta
- Transpose
- Ordinary one-way ANOVA**

| Ordinary one-way ANOVA |                                             | ANOVA results         |           |           |                     |                |
|------------------------|---------------------------------------------|-----------------------|-----------|-----------|---------------------|----------------|
| 1                      | Table Analyzed                              | Transpose of IL-1beta |           |           |                     |                |
| 2                      | Data sets analyzed                          | A-D                   |           |           |                     |                |
| 3                      |                                             |                       |           |           |                     |                |
| 4                      | <b>ANOVA summary</b>                        |                       |           |           |                     |                |
| 5                      | F                                           | 13.86                 |           |           |                     |                |
| 6                      | P value                                     | <0.0001               |           |           |                     |                |
| 7                      | P value summary                             | ****                  |           |           |                     |                |
| 8                      | Significant diff. among means (P < 0.05)?   | Yes                   |           |           |                     |                |
| 9                      | R square                                    | 0.6752                |           |           |                     |                |
| 10                     |                                             |                       |           |           |                     |                |
| 11                     | <b>Brown-Forsythe test</b>                  |                       |           |           |                     |                |
| 12                     | F (DFn, DFd)                                | 8.460 (3, 20)         |           |           |                     |                |
| 13                     | P value                                     | 0.0008                |           |           |                     |                |
| 14                     | P value summary                             | ***                   |           |           |                     |                |
| 15                     | Are SDs significantly different (P < 0.05)? | Yes                   |           |           |                     |                |
| 16                     |                                             |                       |           |           |                     |                |
| 17                     | <b>Bartlett's test</b>                      |                       |           |           |                     |                |
| 18                     | Bartlett's statistic (corrected)            |                       |           |           |                     |                |
| 19                     | P value                                     |                       |           |           |                     |                |
| 20                     | P value summary                             |                       |           |           |                     |                |
| 21                     | Are SDs significantly different (P < 0.05)? |                       |           |           |                     |                |
| 22                     |                                             |                       |           |           |                     |                |
| 23                     | <b>ANOVA table</b>                          | <b>SS</b>             | <b>DF</b> | <b>MS</b> | <b>F (DFn, DFd)</b> | <b>P value</b> |
| 24                     | Treatment (between columns)                 | 3533                  | 3         | 1178      | F (3, 20) = 13.86   | P<0.0001       |
| 25                     | Residual (within columns)                   | 1699                  | 20        | 84.97     |                     |                |
| 26                     | Total                                       | 5232                  | 23        |           |                     |                |
| 27                     |                                             |                       |           |           |                     |                |
| 28                     | <b>Data summary</b>                         |                       |           |           |                     |                |

Ordinary one-way ANOVA of Transpose of IL- Row 1, Column A

SourceDataforFigure1B

Prism 8

File Sheet Undo Clipboard Analysis Interpret Change Draw Write Text Export Print Send LA Help

Restrict: Sheet is Any

▼ Data Tables

- IL-1beta
- IL-6
- IL-10
- TNF
- New Data Table...

▼ Info

- Project info 1
- Project info 1
- New Info...

▼ Results

- Transpose of IL-1beta
- Ordinary one-way ANOVA of Transpose of IL-1beta
- Transpose of IL-6**
- Ordinary one-way ANOVA of Transpose of IL-6
- Transpose of IL-10
- Ordinary one-way ANOVA of Transpose of IL-10

Family

- IL-6
  - Transpose
  - Ordinary one-way ANOVA

| Transpose |         | A       | B      | C      | D         | E     | F     | G     | H     | I     | J     | K     | L     |
|-----------|---------|---------|--------|--------|-----------|-------|-------|-------|-------|-------|-------|-------|-------|
|           |         | Control | RBCL   | IRBCL  | LPS       | Title | Title | Title | Title | Title | Title | Title | Title |
|           |         | Y       | Y      | Y      | Y         | Y     | Y     | Y     | Y     | Y     | Y     | Y     | Y     |
| 1         | Donor 2 | 1.000   | 0.757  | 1.000  | 6109.482  |       |       |       |       |       |       |       |       |
| 2         | Donor 1 | 1.000   | 0.015  | 0.015  | 80.531    |       |       |       |       |       |       |       |       |
| 3         | Donor 3 | 1.000   | 5.510  | 1.000  | 5448.730  |       |       |       |       |       |       |       |       |
| 4         | Donor 4 | 1.000   | 19.450 | 12.280 | 10896.210 |       |       |       |       |       |       |       |       |
| 5         | Donor 5 | 1.000   | 1.000  | 5.640  | 3265.930  |       |       |       |       |       |       |       |       |
| 6         | Donor 6 | 1.000   | 1.000  | 9.380  | 5290.130  |       |       |       |       |       |       |       |       |
| 7         |         |         |        |        |           |       |       |       |       |       |       |       |       |
| 8         |         |         |        |        |           |       |       |       |       |       |       |       |       |
| 9         |         |         |        |        |           |       |       |       |       |       |       |       |       |
| 10        |         |         |        |        |           |       |       |       |       |       |       |       |       |
| 11        |         |         |        |        |           |       |       |       |       |       |       |       |       |
| 12        |         |         |        |        |           |       |       |       |       |       |       |       |       |
| 13        |         |         |        |        |           |       |       |       |       |       |       |       |       |
| 14        |         |         |        |        |           |       |       |       |       |       |       |       |       |
| 15        |         |         |        |        |           |       |       |       |       |       |       |       |       |
| 16        |         |         |        |        |           |       |       |       |       |       |       |       |       |
| 17        |         |         |        |        |           |       |       |       |       |       |       |       |       |
| 18        |         |         |        |        |           |       |       |       |       |       |       |       |       |
| 19        |         |         |        |        |           |       |       |       |       |       |       |       |       |
| 20        |         |         |        |        |           |       |       |       |       |       |       |       |       |
| 21        |         |         |        |        |           |       |       |       |       |       |       |       |       |
| 22        |         |         |        |        |           |       |       |       |       |       |       |       |       |
| 23        |         |         |        |        |           |       |       |       |       |       |       |       |       |
| 24        |         |         |        |        |           |       |       |       |       |       |       |       |       |
| 25        |         |         |        |        |           |       |       |       |       |       |       |       |       |
| 26        |         |         |        |        |           |       |       |       |       |       |       |       |       |
| 27        |         |         |        |        |           |       |       |       |       |       |       |       |       |
| 28        |         |         |        |        |           |       |       |       |       |       |       |       |       |
| 29        |         |         |        |        |           |       |       |       |       |       |       |       |       |

Transpose of IL-6

Row 1, A: Control

SourceDataforFigure1B

File Sheet Undo Clipboard Analysis Interpret Change Draw Write Text Export Print Send LA Help

Prism 8

ANOVA results Multiple comparisons

Restrict: Sheet is Any

Data Tables

- IL-1beta
- IL-6
- IL-10
- TNF
- New Data Table...

Info

- Project info 1
- Project info 1
- New Info...

Results

- Transpose of IL-1beta
- Ordinary one-way ANOVA of Transpose of IL-1beta
- Transpose of IL-6
- Ordinary one-way ANOVA of Transpose of IL-6**
- Transpose of IL-10
- Ordinary one-way ANOVA of Transpose of IL-10

Family

- IL-6
- Transpose
- Ordinary one-way ANOVA**

| Ordinary one-way ANOVA |                                             | ANOVA results     |           |           |                     |                |
|------------------------|---------------------------------------------|-------------------|-----------|-----------|---------------------|----------------|
| 1                      | Table Analyzed                              | Transpose of IL-6 |           |           |                     |                |
| 2                      | Data sets analyzed                          | A-D               |           |           |                     |                |
| 3                      |                                             |                   |           |           |                     |                |
| 4                      | <b>ANOVA summary</b>                        |                   |           |           |                     |                |
| 5                      | F                                           | 12.71             |           |           |                     |                |
| 6                      | P value                                     | <0.0001           |           |           |                     |                |
| 7                      | P value summary                             | ****              |           |           |                     |                |
| 8                      | Significant diff. among means (P < 0.05)?   | Yes               |           |           |                     |                |
| 9                      | R square                                    | 0.6559            |           |           |                     |                |
| 10                     |                                             |                   |           |           |                     |                |
| 11                     | <b>Brown-Forsythe test</b>                  |                   |           |           |                     |                |
| 12                     | F (DFn, DFd)                                | 5.010 (3, 20)     |           |           |                     |                |
| 13                     | P value                                     | 0.0094            |           |           |                     |                |
| 14                     | P value summary                             | **                |           |           |                     |                |
| 15                     | Are SDs significantly different (P < 0.05)? | Yes               |           |           |                     |                |
| 16                     |                                             |                   |           |           |                     |                |
| 17                     | <b>Bartlett's test</b>                      |                   |           |           |                     |                |
| 18                     | Bartlett's statistic (corrected)            |                   |           |           |                     |                |
| 19                     | P value                                     |                   |           |           |                     |                |
| 20                     | P value summary                             |                   |           |           |                     |                |
| 21                     | Are SDs significantly different (P < 0.05)? |                   |           |           |                     |                |
| 22                     |                                             |                   |           |           |                     |                |
| 23                     | <b>ANOVA table</b>                          | <b>SS</b>         | <b>DF</b> | <b>MS</b> | <b>F (DFn, DFd)</b> | <b>P value</b> |
| 24                     | Treatment (between columns)                 | 120668153         | 3         | 40222718  | F (3, 20) = 12.71   | P<0.0001       |
| 25                     | Residual (within columns)                   | 63291976          | 20        | 3164599   |                     |                |
| 26                     | Total                                       | 183960129         | 23        |           |                     |                |
| 27                     |                                             |                   |           |           |                     |                |
| 28                     | <b>Data summary</b>                         |                   |           |           |                     |                |

Ordinary one-way ANOVA of Transpose of IL-6 Row 1, Column A



SourceDataforFigure1B

File Sheet Undo Clipboard Analysis Interpret Change Draw Write Text Export Print Send LA Help

Prism 8

ANOVA results Multiple comparisons

Restrict: Sheet is Any

Data Tables

- IL-1beta
- IL-6
- IL-10
- TNF
- New Data Table...

Info

- Project info 1
- Project info 1
- New Info...

Results

- Transpose of IL-1beta
- Ordinary one-way ANOVA of Transpose of IL-1beta
- Transpose of IL-6
- Ordinary one-way ANOVA of Transpose of IL-6**
- Transpose of IL-10
- Ordinary one-way ANOVA of Transpose of IL-10

Family

- IL-6
- Transpose
- Ordinary one-way ANOVA**

| Ordinary one-way ANOVA |                                          | Multiple comparisons |                           |                     |                    |                         |           |           |
|------------------------|------------------------------------------|----------------------|---------------------------|---------------------|--------------------|-------------------------|-----------|-----------|
| 1                      | Number of families                       | 1                    |                           |                     |                    |                         |           |           |
| 2                      | Number of comparisons per family         | 6                    |                           |                     |                    |                         |           |           |
| 3                      | Alpha                                    | 0.05                 |                           |                     |                    |                         |           |           |
| 4                      |                                          |                      |                           |                     |                    |                         |           |           |
| 5                      | <b>Tukey's multiple comparisons test</b> | <b>Mean Diff.</b>    | <b>95.00% CI of diff.</b> | <b>Significant?</b> | <b>Summary</b>     | <b>Adjusted P Value</b> |           |           |
| 6                      | Control vs. RBCL                         | -3.622               | -2878 to 2871             | No                  | ns                 | >0.9999                 | A-B       |           |
| 7                      | Control vs. iRBCL                        | -3.886               | -2879 to 2871             | No                  | ns                 | >0.9999                 | A-C       |           |
| 8                      | Control vs. LPS                          | -5181                | -8056 to -2306            | Yes                 | ***                | 0.0003                  | A-D       |           |
| 9                      | RBCL vs. iRBCL                           | -0.2638              | -2875 to 2874             | No                  | ns                 | >0.9999                 | B-C       |           |
| 10                     | RBCL vs. LPS                             | -5177                | -8052 to -2303            | Yes                 | ***                | 0.0003                  | B-D       |           |
| 11                     | iRBCL vs. LPS                            | -5177                | -8052 to -2302            | Yes                 | ***                | 0.0003                  | C-D       |           |
| 12                     |                                          |                      |                           |                     |                    |                         |           |           |
| 13                     | <b>Test details</b>                      | <b>Mean 1</b>        | <b>Mean 2</b>             | <b>Mean Diff.</b>   | <b>SE of diff.</b> | <b>n1</b>               | <b>n2</b> | <b>q</b>  |
| 14                     | Control vs. RBCL                         | 1.000                | 4.622                     | -3.622              | 1027               | 6                       | 6         | 0.004987  |
| 15                     | Control vs. iRBCL                        | 1.000                | 4.886                     | -3.886              | 1027               | 6                       | 6         | 0.005350  |
| 16                     | Control vs. LPS                          | 1.000                | 5182                      | -5181               | 1027               | 6                       | 6         | 7.134     |
| 17                     | RBCL vs. iRBCL                           | 4.622                | 4.886                     | -0.2638             | 1027               | 6                       | 6         | 0.0003633 |
| 18                     | RBCL vs. LPS                             | 4.622                | 5182                      | -5177               | 1027               | 6                       | 6         | 7.129     |
| 19                     | iRBCL vs. LPS                            | 4.886                | 5182                      | -5177               | 1027               | 6                       | 6         | 7.128     |
| 20                     |                                          |                      |                           |                     |                    |                         |           |           |
| 21                     |                                          |                      |                           |                     |                    |                         |           |           |
| 22                     |                                          |                      |                           |                     |                    |                         |           |           |
| 23                     |                                          |                      |                           |                     |                    |                         |           |           |
| 24                     |                                          |                      |                           |                     |                    |                         |           |           |
| 25                     |                                          |                      |                           |                     |                    |                         |           |           |
| 26                     |                                          |                      |                           |                     |                    |                         |           |           |
| 27                     |                                          |                      |                           |                     |                    |                         |           |           |
| 28                     |                                          |                      |                           |                     |                    |                         |           |           |

Ordinary one-way ANOVA of Transpose of IL-6 Row 1, Column A

SourceDataforFigure1B

File Sheet Undo Clipboard Analysis Interpret Change Draw Write Text Export Print Send LA Help

Prism 8

Restrict: Sheet is Any

ANOVA results Multiple comparisons

▼ Data Tables

- IL-1beta
- IL-6
- IL-10
- TNF
- New Data Table...

▼ Info

- Project info 1
- Project info 1
- New Info...

▼ Results

- Transpose of IL-1beta
- Ordinary one-way ANOVA of Transpose of IL-1beta**
- Transpose of IL-6
- Ordinary one-way ANOVA of Transpose of IL-6
- Transpose of IL-10
- Ordinary one-way ANOVA of Transpose of IL-10

Family

- IL-1beta
- Transpose
- Ordinary one-way ANOVA**

| Ordinary one-way ANOVA |                                          | Multiple comparisons |                           |                     |                    |                         |           |          |           |  |  |  |  |
|------------------------|------------------------------------------|----------------------|---------------------------|---------------------|--------------------|-------------------------|-----------|----------|-----------|--|--|--|--|
| 1                      | Number of families                       | 1                    |                           |                     |                    |                         |           |          |           |  |  |  |  |
| 2                      | Number of comparisons per family         | 6                    |                           |                     |                    |                         |           |          |           |  |  |  |  |
| 3                      | Alpha                                    | 0.05                 |                           |                     |                    |                         |           |          |           |  |  |  |  |
| 4                      |                                          |                      |                           |                     |                    |                         |           |          |           |  |  |  |  |
| 5                      | <b>Tukey's multiple comparisons test</b> | <b>Mean Diff.</b>    | <b>95.00% CI of diff.</b> | <b>Significant?</b> | <b>Summary</b>     | <b>Adjusted P Value</b> |           |          |           |  |  |  |  |
| 6                      | Control vs. RBCL                         | 0.000                | -14.90 to 14.90           | No                  | ns                 | >0.9999                 |           |          |           |  |  |  |  |
| 7                      | Control vs. iRBCL                        | 0.000                | -14.90 to 14.90           | No                  | ns                 | >0.9999                 |           |          |           |  |  |  |  |
| 8                      | Control vs. LPS                          | -28.02               | -42.91 to -13.12          | Yes                 | ***                | 0.0002                  |           |          |           |  |  |  |  |
| 9                      | RBCL vs. iRBCL                           | 0.000                | -14.90 to 14.90           | No                  | ns                 | >0.9999                 |           |          |           |  |  |  |  |
| 10                     | RBCL vs. LPS                             | -28.02               | -42.91 to -13.12          | Yes                 | ***                | 0.0002                  |           |          |           |  |  |  |  |
| 11                     | iRBCL vs. LPS                            | -28.02               | -42.91 to -13.12          | Yes                 | ***                | 0.0002                  |           |          |           |  |  |  |  |
| 12                     |                                          |                      |                           |                     |                    |                         |           |          |           |  |  |  |  |
| 13                     | <b>Test details</b>                      | <b>Mean 1</b>        | <b>Mean 2</b>             | <b>Mean Diff.</b>   | <b>SE of diff.</b> | <b>n1</b>               | <b>n2</b> | <b>q</b> | <b>DF</b> |  |  |  |  |
| 14                     | Control vs. RBCL                         | 1.000                | 1.000                     | 0.000               | 5.322              | 6                       | 6         | 0.000    | 20        |  |  |  |  |
| 15                     | Control vs. iRBCL                        | 1.000                | 1.000                     | 0.000               | 5.322              | 6                       | 6         | 0.000    | 20        |  |  |  |  |
| 16                     | Control vs. LPS                          | 1.000                | 29.02                     | -28.02              | 5.322              | 6                       | 6         | 7.445    | 20        |  |  |  |  |
| 17                     | RBCL vs. iRBCL                           | 1.000                | 1.000                     | 0.000               | 5.322              | 6                       | 6         | 0.000    | 20        |  |  |  |  |
| 18                     | RBCL vs. LPS                             | 1.000                | 29.02                     | -28.02              | 5.322              | 6                       | 6         | 7.445    | 20        |  |  |  |  |
| 19                     | iRBCL vs. LPS                            | 1.000                | 29.02                     | -28.02              | 5.322              | 6                       | 6         | 7.445    | 20        |  |  |  |  |
| 20                     |                                          |                      |                           |                     |                    |                         |           |          |           |  |  |  |  |
| 21                     |                                          |                      |                           |                     |                    |                         |           |          |           |  |  |  |  |
| 22                     |                                          |                      |                           |                     |                    |                         |           |          |           |  |  |  |  |
| 23                     |                                          |                      |                           |                     |                    |                         |           |          |           |  |  |  |  |
| 24                     |                                          |                      |                           |                     |                    |                         |           |          |           |  |  |  |  |
| 25                     |                                          |                      |                           |                     |                    |                         |           |          |           |  |  |  |  |
| 26                     |                                          |                      |                           |                     |                    |                         |           |          |           |  |  |  |  |
| 27                     |                                          |                      |                           |                     |                    |                         |           |          |           |  |  |  |  |
| 28                     |                                          |                      |                           |                     |                    |                         |           |          |           |  |  |  |  |

Ordinary one-way ANOVA of Transpose of IL-1beta Row 1, Column A

SourceDataforFigure1B

Prism 8

File Sheet Undo Clipboard Analysis Interpret Change Draw Write Text Export Print Send LA Help

Restrict: Sheet is Any

▼ Data Tables

- IL-1beta
- IL-6
- IL-10**
- TNF
- New Data Table...

▼ Info

- Project info 1
- Project info 1
- New Info...

▼ Results

- Transpose of IL-1beta
- Ordinary one-way ANOVA of Transpose of IL-1beta
- Transpose of IL-6
- Ordinary one-way ANOVA of Transpose of IL-6
- Transpose of IL-10**
- Ordinary one-way ANOVA of Transpose of IL-10

Family

- IL-10**
  - Transpose**
    - Ordinary one-way ANOVA

| Transpose |         | A       | B     | C     | D      | E     | F     | G     | H     | I     | J     | K     | L     |
|-----------|---------|---------|-------|-------|--------|-------|-------|-------|-------|-------|-------|-------|-------|
|           |         | Control | RBCL  | IRBCL | LPS    | Title | Title | Title | Title | Title | Title | Title | Title |
|           |         | Y       | Y     | Y     | Y      | Y     | Y     | Y     | Y     | Y     | Y     | Y     | Y     |
| 1         | Donor 2 | 1.000   | 0.865 | 1.135 | 19.187 |       |       |       |       |       |       |       |       |
| 2         | Donor 1 | 1.000   | 0.272 | 0.739 | 34.332 |       |       |       |       |       |       |       |       |
| 3         | Donor 3 | 1.000   | 1.000 | 1.000 | 62.090 |       |       |       |       |       |       |       |       |
| 4         | Donor 4 | 1.000   | 2.510 | 2.410 | 35.260 |       |       |       |       |       |       |       |       |
| 5         | Donor 5 | 1.000   | 1.000 | 1.000 | 4.920  |       |       |       |       |       |       |       |       |
| 6         | Donor 6 | 1.000   | 1.000 | 2.080 | 13.710 |       |       |       |       |       |       |       |       |
| 7         |         |         |       |       |        |       |       |       |       |       |       |       |       |
| 8         |         |         |       |       |        |       |       |       |       |       |       |       |       |
| 9         |         |         |       |       |        |       |       |       |       |       |       |       |       |
| 10        |         |         |       |       |        |       |       |       |       |       |       |       |       |
| 11        |         |         |       |       |        |       |       |       |       |       |       |       |       |
| 12        |         |         |       |       |        |       |       |       |       |       |       |       |       |
| 13        |         |         |       |       |        |       |       |       |       |       |       |       |       |
| 14        |         |         |       |       |        |       |       |       |       |       |       |       |       |
| 15        |         |         |       |       |        |       |       |       |       |       |       |       |       |
| 16        |         |         |       |       |        |       |       |       |       |       |       |       |       |
| 17        |         |         |       |       |        |       |       |       |       |       |       |       |       |
| 18        |         |         |       |       |        |       |       |       |       |       |       |       |       |
| 19        |         |         |       |       |        |       |       |       |       |       |       |       |       |
| 20        |         |         |       |       |        |       |       |       |       |       |       |       |       |
| 21        |         |         |       |       |        |       |       |       |       |       |       |       |       |
| 22        |         |         |       |       |        |       |       |       |       |       |       |       |       |
| 23        |         |         |       |       |        |       |       |       |       |       |       |       |       |
| 24        |         |         |       |       |        |       |       |       |       |       |       |       |       |
| 25        |         |         |       |       |        |       |       |       |       |       |       |       |       |
| 26        |         |         |       |       |        |       |       |       |       |       |       |       |       |
| 27        |         |         |       |       |        |       |       |       |       |       |       |       |       |
| 28        |         |         |       |       |        |       |       |       |       |       |       |       |       |
| 29        |         |         |       |       |        |       |       |       |       |       |       |       |       |

Transpose of IL-10

Row 1, A: Control

SourceDataforFigure1B

Prism 8

File Sheet Undo Clipboard Analysis Interpret Change Draw Write Text Export Print Send LA Help

Restrict: Sheet is Any

Info Project info 1

- Project info 1
- New Info...

Results

- Transpose of IL-1beta
- Ordinary one-way ANOVA of Transpose of IL-1beta
- Transpose of IL-6
- Ordinary one-way ANOVA of Transpose of IL-6
- Transpose of IL-10
- Ordinary one-way ANOVA of Transpose of IL-10
- Transpose of TNF**
- Ordinary one-way ANOVA of Transpose of TNF
- New Analysis...

Graphs

- IL-1beta
- IL-6
- IL-10

Family

- TNF
- Transpose
- Ordinary one-way ANOVA

|    |           | A       | B     | C      | D        | E     | F     | G     | H     | I     | J     | K     | L     |
|----|-----------|---------|-------|--------|----------|-------|-------|-------|-------|-------|-------|-------|-------|
|    | Transpose | Control | RBCL  | IRBCL  | LPS      | Title | Title | Title | Title | Title | Title | Title | Title |
| 1  | Donor 2   | 1.000   | 1.954 | 2.093  | 998.413  | Y     | Y     | Y     | Y     | Y     | Y     | Y     | Y     |
| 2  | Donor 1   | 1.000   | 0.011 | 0.662  | 14.629   |       |       |       |       |       |       |       |       |
| 3  | Donor 3   | 1.000   | 1.647 | 3.911  | 578.387  |       |       |       |       |       |       |       |       |
| 4  | Donor 4   | 1.000   | 3.805 | 3.094  | 888.811  |       |       |       |       |       |       |       |       |
| 5  | Donor 5   | 1.000   | 1.000 | 10.430 | 667.560  |       |       |       |       |       |       |       |       |
| 6  | Donor 6   | 1.000   | 2.990 | 10.300 | 1372.370 |       |       |       |       |       |       |       |       |
| 7  |           |         |       |        |          |       |       |       |       |       |       |       |       |
| 8  |           |         |       |        |          |       |       |       |       |       |       |       |       |
| 9  |           |         |       |        |          |       |       |       |       |       |       |       |       |
| 10 |           |         |       |        |          |       |       |       |       |       |       |       |       |
| 11 |           |         |       |        |          |       |       |       |       |       |       |       |       |
| 12 |           |         |       |        |          |       |       |       |       |       |       |       |       |
| 13 |           |         |       |        |          |       |       |       |       |       |       |       |       |
| 14 |           |         |       |        |          |       |       |       |       |       |       |       |       |
| 15 |           |         |       |        |          |       |       |       |       |       |       |       |       |
| 16 |           |         |       |        |          |       |       |       |       |       |       |       |       |
| 17 |           |         |       |        |          |       |       |       |       |       |       |       |       |
| 18 |           |         |       |        |          |       |       |       |       |       |       |       |       |
| 19 |           |         |       |        |          |       |       |       |       |       |       |       |       |
| 20 |           |         |       |        |          |       |       |       |       |       |       |       |       |
| 21 |           |         |       |        |          |       |       |       |       |       |       |       |       |
| 22 |           |         |       |        |          |       |       |       |       |       |       |       |       |
| 23 |           |         |       |        |          |       |       |       |       |       |       |       |       |
| 24 |           |         |       |        |          |       |       |       |       |       |       |       |       |
| 25 |           |         |       |        |          |       |       |       |       |       |       |       |       |
| 26 |           |         |       |        |          |       |       |       |       |       |       |       |       |
| 27 |           |         |       |        |          |       |       |       |       |       |       |       |       |
| 28 |           |         |       |        |          |       |       |       |       |       |       |       |       |
| 29 |           |         |       |        |          |       |       |       |       |       |       |       |       |

Transpose of TNF

Row 1, A: Control

SourceDataforFigure1B

File Sheet Undo Clipboard Analysis Interpret Change Draw Write Text Export Print Send LA Help

Prism 8

ANOVA results Multiple comparisons

Restrict: Sheet is Any

Info Project info 1

- Project info 1
- New Info...

Results

- Transpose of IL-1beta
- Ordinary one-way ANOVA of Transpose of IL-1beta
- Transpose of IL-6
- Ordinary one-way ANOVA of Transpose of IL-6
- Transpose of IL-10
- Ordinary one-way ANOVA of Transpose of IL-10**
- Transpose of TNF
- Ordinary one-way ANOVA of Transpose of TNF
- New Analysis...

Graphs

- IL-1beta
- IL-6
- IL-10

Family

- IL-10
- Transpose
- Ordinary one-way ANOVA**

| ANOVA results |                                             |                    |           |           |                     |                |
|---------------|---------------------------------------------|--------------------|-----------|-----------|---------------------|----------------|
| 1             | Table Analyzed                              | Transpose of IL-10 |           |           |                     |                |
| 2             | Data sets analyzed                          | A-D                |           |           |                     |                |
| 3             |                                             |                    |           |           |                     |                |
| 4             | <b>ANOVA summary</b>                        |                    |           |           |                     |                |
| 5             | F                                           | 10.61              |           |           |                     |                |
| 6             | P value                                     | 0.0002             |           |           |                     |                |
| 7             | P value summary                             | ***                |           |           |                     |                |
| 8             | Significant diff. among means (P < 0.05)?   | Yes                |           |           |                     |                |
| 9             | R square                                    | 0.6141             |           |           |                     |                |
| 10            |                                             |                    |           |           |                     |                |
| 11            | <b>Brown-Forsythe test</b>                  |                    |           |           |                     |                |
| 12            | F (DFn, DFd)                                | 11.46 (3, 20)      |           |           |                     |                |
| 13            | P value                                     | 0.0001             |           |           |                     |                |
| 14            | P value summary                             | ***                |           |           |                     |                |
| 15            | Are SDs significantly different (P < 0.05)? | Yes                |           |           |                     |                |
| 16            |                                             |                    |           |           |                     |                |
| 17            | <b>Bartlett's test</b>                      |                    |           |           |                     |                |
| 18            | Bartlett's statistic (corrected)            |                    |           |           |                     |                |
| 19            | P value                                     |                    |           |           |                     |                |
| 20            | P value summary                             |                    |           |           |                     |                |
| 21            | Are SDs significantly different (P < 0.05)? |                    |           |           |                     |                |
| 22            |                                             |                    |           |           |                     |                |
| 23            | <b>ANOVA table</b>                          | <b>SS</b>          | <b>DF</b> | <b>MS</b> | <b>F (DFn, DFd)</b> | <b>P value</b> |
| 24            | Treatment (between columns)                 | 3301               | 3         | 1100      | F (3, 20) = 10.61   | P=0.0002       |
| 25            | Residual (within columns)                   | 2074               | 20        | 103.7     |                     |                |
| 26            | Total                                       | 5375               | 23        |           |                     |                |
| 27            |                                             |                    |           |           |                     |                |
| 28            | <b>Data summary</b>                         |                    |           |           |                     |                |

Ordinary one-way ANOVA of Transpose of IL-10 Row 1, Column A

SourceDataforFigure1B

File Sheet Undo Clipboard Analysis Interpret Change Draw Write Text Export Print Send LA Help

Prism8

ANOVA results Multiple comparisons

Restrict: Sheet is Any

Info Project info 1

- Project info 1
- New Info...

Results

- Transpose of IL-1beta
- Ordinary one-way ANOVA of Transpose of IL-1beta
- Transpose of IL-6
- Ordinary one-way ANOVA of Transpose of IL-6
- Transpose of IL-10
- Ordinary one-way ANOVA of Transpose of IL-10**
- Transpose of TNF
- Ordinary one-way ANOVA of Transpose of TNF
- New Analysis...

Graphs

- IL-1beta
- IL-6
- IL-10

Family

- IL-10
- Transpose
- Ordinary one-way ANOVA**

| Ordinary one-way ANOVA |                                          | Multiple comparisons |                           |                     |                    |                         |           |          |
|------------------------|------------------------------------------|----------------------|---------------------------|---------------------|--------------------|-------------------------|-----------|----------|
| 1                      | Number of families                       | 1                    |                           |                     |                    |                         |           |          |
| 2                      | Number of comparisons per family         | 6                    |                           |                     |                    |                         |           |          |
| 3                      | Alpha                                    | 0.05                 |                           |                     |                    |                         |           |          |
| 4                      |                                          |                      |                           |                     |                    |                         |           |          |
| 5                      | <b>Tukey's multiple comparisons test</b> | <b>Mean Diff.</b>    | <b>95.00% CI of diff.</b> | <b>Significant?</b> | <b>Summary</b>     | <b>Adjusted P Value</b> |           |          |
| 6                      | Control vs. RBCL                         | -0.1077              | -16.56 to 16.35           | No                  | ns                 | >0.9999                 | A-B       |          |
| 7                      | Control vs. iRBCL                        | -0.3941              | -16.85 to 16.06           | No                  | ns                 | 0.9999                  | A-C       |          |
| 8                      | Control vs. LPS                          | -27.25               | -43.71 to -10.79          | Yes                 | ***                | 0.0009                  | A-D       |          |
| 9                      | RBCL vs. iRBCL                           | -0.2864              | -16.74 to 16.17           | No                  | ns                 | >0.9999                 | B-C       |          |
| 10                     | RBCL vs. LPS                             | -27.14               | -43.60 to -10.69          | Yes                 | ***                | 0.0009                  | B-D       |          |
| 11                     | iRBCL vs. LPS                            | -26.86               | -43.31 to -10.40          | Yes                 | ***                | 0.0010                  | C-D       |          |
| 12                     |                                          |                      |                           |                     |                    |                         |           |          |
| 13                     | <b>Test details</b>                      | <b>Mean 1</b>        | <b>Mean 2</b>             | <b>Mean Diff.</b>   | <b>SE of diff.</b> | <b>n1</b>               | <b>n2</b> | <b>q</b> |
| 14                     | Control vs. RBCL                         | 1.000                | 1.108                     | -0.1077             | 5.880              | 6                       | 6         | 0.02591  |
| 15                     | Control vs. iRBCL                        | 1.000                | 1.394                     | -0.3941             | 5.880              | 6                       | 6         | 0.09479  |
| 16                     | Control vs. LPS                          | 1.000                | 28.25                     | -27.25              | 5.880              | 6                       | 6         | 6.554    |
| 17                     | RBCL vs. iRBCL                           | 1.108                | 1.394                     | -0.2864             | 5.880              | 6                       | 6         | 0.06889  |
| 18                     | RBCL vs. LPS                             | 1.108                | 28.25                     | -27.14              | 5.880              | 6                       | 6         | 6.528    |
| 19                     | iRBCL vs. LPS                            | 1.394                | 28.25                     | -26.86              | 5.880              | 6                       | 6         | 6.460    |
| 20                     |                                          |                      |                           |                     |                    |                         |           |          |
| 21                     |                                          |                      |                           |                     |                    |                         |           |          |
| 22                     |                                          |                      |                           |                     |                    |                         |           |          |
| 23                     |                                          |                      |                           |                     |                    |                         |           |          |
| 24                     |                                          |                      |                           |                     |                    |                         |           |          |
| 25                     |                                          |                      |                           |                     |                    |                         |           |          |
| 26                     |                                          |                      |                           |                     |                    |                         |           |          |
| 27                     |                                          |                      |                           |                     |                    |                         |           |          |
| 28                     |                                          |                      |                           |                     |                    |                         |           |          |

Ordinary one-way ANOVA of Transpose of IL-10 Row 1, Column A

SourceDataforFigure1B

File Sheet Undo Clipboard Analysis Interpret Change Draw Write Text Export Print Send LA Help

Prism 8

Restrict: Sheet is Any

ANOVA results Multiple comparisons

Project info 1

Project info 1

New Info...

Results

- Transpose of IL-1beta
- Ordinary one-way ANOVA of Transpose of IL-1beta
- Transpose of IL-6
- Ordinary one-way ANOVA of Transpose of IL-6
- Transpose of IL-10
- Ordinary one-way ANOVA of Transpose of IL-10
- Transpose of TNF
- Ordinary one-way ANOVA of Transpose of TNF**
- New Analysis...

Graphs

- IL-1beta
- IL-6
- IL-10

Family

- TNF
- Transpose
- Ordinary one-way ANOVA**

| Ordinary one-way ANOVA |                                          | Multiple comparisons      |                     |                    |                         |           |          |           |  |  |  |
|------------------------|------------------------------------------|---------------------------|---------------------|--------------------|-------------------------|-----------|----------|-----------|--|--|--|
| 1                      | Number of families                       |                           |                     |                    |                         |           |          |           |  |  |  |
| 2                      | Number of comparisons per family         |                           |                     |                    |                         |           |          |           |  |  |  |
| 3                      | Alpha                                    |                           |                     |                    |                         |           |          |           |  |  |  |
| 4                      |                                          |                           |                     |                    |                         |           |          |           |  |  |  |
| 5                      | <b>Tukey's multiple comparisons test</b> | <b>95.00% CI of diff.</b> | <b>Significant?</b> | <b>Summary</b>     | <b>Adjusted P Value</b> |           |          |           |  |  |  |
| 6                      | Control vs. RBCL                         | -370.3 to 368.5           | No                  | ns                 | >0.9999                 |           |          | A-B       |  |  |  |
| 7                      | Control vs. iRBCL                        | -373.5 to 365.4           | No                  | ns                 | >0.9999                 |           |          | A-C       |  |  |  |
| 8                      | Control vs. LPS                          | -1122 to -382.9           | Yes                 | ****               | <0.0001                 |           |          | A-D       |  |  |  |
| 9                      | RBCL vs. iRBCL                           | -372.6 to 366.3           | No                  | ns                 | >0.9999                 |           |          | B-C       |  |  |  |
| 10                     | RBCL vs. LPS                             | -1121 to -382.0           | Yes                 | ****               | <0.0001                 |           |          | B-D       |  |  |  |
| 11                     | iRBCL vs. LPS                            | -1118 to -378.8           | Yes                 | ****               | <0.0001                 |           |          | C-D       |  |  |  |
| 12                     |                                          |                           |                     |                    |                         |           |          |           |  |  |  |
| 13                     | <b>Test details</b>                      | <b>Mean 2</b>             | <b>Mean Diff.</b>   | <b>SE of diff.</b> | <b>n1</b>               | <b>n2</b> | <b>q</b> | <b>DF</b> |  |  |  |
| 14                     | Control vs. RBCL                         | 1.901                     | -0.9013             | 132.0              | 6                       | 6         | 0.009656 | 20        |  |  |  |
| 15                     | Control vs. iRBCL                        | 5.082                     | -4.082              | 132.0              | 6                       | 6         | 0.04373  | 20        |  |  |  |
| 16                     | Control vs. LPS                          | 753.4                     | -752.4              | 132.0              | 6                       | 6         | 8.061    | 20        |  |  |  |
| 17                     | RBCL vs. iRBCL                           | 5.082                     | -3.180              | 132.0              | 6                       | 6         | 0.03408  | 20        |  |  |  |
| 18                     | RBCL vs. LPS                             | 753.4                     | -751.5              | 132.0              | 6                       | 6         | 8.051    | 20        |  |  |  |
| 19                     | iRBCL vs. LPS                            | 753.4                     | -748.3              | 132.0              | 6                       | 6         | 8.017    | 20        |  |  |  |
| 20                     |                                          |                           |                     |                    |                         |           |          |           |  |  |  |
| 21                     |                                          |                           |                     |                    |                         |           |          |           |  |  |  |
| 22                     |                                          |                           |                     |                    |                         |           |          |           |  |  |  |
| 23                     |                                          |                           |                     |                    |                         |           |          |           |  |  |  |
| 24                     |                                          |                           |                     |                    |                         |           |          |           |  |  |  |
| 25                     |                                          |                           |                     |                    |                         |           |          |           |  |  |  |
| 26                     |                                          |                           |                     |                    |                         |           |          |           |  |  |  |
| 27                     |                                          |                           |                     |                    |                         |           |          |           |  |  |  |
| 28                     |                                          |                           |                     |                    |                         |           |          |           |  |  |  |

Ordinary one-way ANOVA of Transpose of TNF Row 1, Column A

SourceDataforFigure1B

File Sheet Undo Clipboard Analysis Interpret Change Draw Write Text Export Print Send LA Help

Prism 8

ANOVA results Multiple comparisons

Restrict: Sheet is Any

Info Project info 1

- Project info 1
- New Info...

Results

- Transpose of IL-1beta
- Ordinary one-way ANOVA of Transpose of IL-1beta
- Transpose of IL-6
- Ordinary one-way ANOVA of Transpose of IL-6
- Transpose of IL-10
- Ordinary one-way ANOVA of Transpose of IL-10
- Transpose of TNF
- Ordinary one-way ANOVA of Transpose of TNF**
- New Analysis...

Graphs

- IL-1beta
- IL-6
- IL-10

Family

- TNF
- Transpose
- Ordinary one-way ANOVA**

| Ordinary one-way ANOVA |                                             | ANOVA results    |           |           |                     |                |
|------------------------|---------------------------------------------|------------------|-----------|-----------|---------------------|----------------|
| 1                      | Table Analyzed                              | Transpose of TNF |           |           |                     |                |
| 2                      | Data sets analyzed                          | A-D              |           |           |                     |                |
| 3                      |                                             |                  |           |           |                     |                |
| 4                      | <b>ANOVA summary</b>                        |                  |           |           |                     |                |
| 5                      | F                                           | 16.17            |           |           |                     |                |
| 6                      | P value                                     | <0.0001          |           |           |                     |                |
| 7                      | P value summary                             | ****             |           |           |                     |                |
| 8                      | Significant diff. among means (P < 0.05)?   | Yes              |           |           |                     |                |
| 9                      | R square                                    | 0.7081           |           |           |                     |                |
| 10                     |                                             |                  |           |           |                     |                |
| 11                     | <b>Brown-Forsythe test</b>                  |                  |           |           |                     |                |
| 12                     | F (DFn, DFd)                                | 8.623 (3, 20)    |           |           |                     |                |
| 13                     | P value                                     | 0.0007           |           |           |                     |                |
| 14                     | P value summary                             | ***              |           |           |                     |                |
| 15                     | Are SDs significantly different (P < 0.05)? | Yes              |           |           |                     |                |
| 16                     |                                             |                  |           |           |                     |                |
| 17                     | <b>Bartlett's test</b>                      |                  |           |           |                     |                |
| 18                     | Bartlett's statistic (corrected)            |                  |           |           |                     |                |
| 19                     | P value                                     |                  |           |           |                     |                |
| 20                     | P value summary                             |                  |           |           |                     |                |
| 21                     | Are SDs significantly different (P < 0.05)? |                  |           |           |                     |                |
| 22                     |                                             |                  |           |           |                     |                |
| 23                     | <b>ANOVA table</b>                          | <b>SS</b>        | <b>DF</b> | <b>MS</b> | <b>F (DFn, DFd)</b> | <b>P value</b> |
| 24                     | Treatment (between columns)                 | 2536037          | 3         | 845346    | F (3, 20) = 16.17   | P<0.0001       |
| 25                     | Residual (within columns)                   | 1045371          | 20        | 52269     |                     |                |
| 26                     | Total                                       | 3581408          | 23        |           |                     |                |
| 27                     |                                             |                  |           |           |                     |                |
| 28                     | <b>Data summary</b>                         |                  |           |           |                     |                |

Ordinary one-way ANOVA of Transpose of TNF Row 1, Column A



SourceDataforFigure1C — Edited

Prism 8

File Sheet Undo Clipboard Analysis Change Import Draw Write Text Export Print Send LA Help

Q Search

▼ Data Tables >>

- IL1beta
- IL6
- IL10
- TNF
- + New Data Table...

▼ Info >>

- Project info 1
- Project info 1
- + New Info...

▼ Results >>

- Transpose of IL1beta
- Ordinary one-way ANOVA of Transpose of IL1beta
- Transpose of IL6
- Ordinary one-way ANOVA of Transpose of IL6
- Transpose of IL10
- Ordinary one-way ANOVA of Transpose of IL10
- Transpose of TNF

Family >>

- IL1beta
  - Transpose
    - Ordinary one-way ANOVA
  - IL1beta

| Table format: Grouped |            | Group A   | Group B   | Group C | Group D | Group E | Group F | Group G | Group H | Group I | Group J | Group K | Group L |
|-----------------------|------------|-----------|-----------|---------|---------|---------|---------|---------|---------|---------|---------|---------|---------|
|                       |            | Donor 1   | Donor 2   | Donor 3 | Title   | Title   | Title   | Title   | Title   | Title   | Title   | Title   | Title   |
|                       |            | Y         | Y         | Y       | Y       | Y       | Y       | Y       | Y       | Y       | Y       | Y       | Y       |
| 1                     | IRBCL      | 1.000000  | 1.000000  | 1.00    |         |         |         |         |         |         |         |         |         |
| 2                     | IFNy+IRBCL | 1.000000  | 1.000000  | 1.00    |         |         |         |         |         |         |         |         |         |
| 3                     | LPS        | 22.810000 | 29.880000 | 20.48   |         |         |         |         |         |         |         |         |         |
| 4                     | IFNy+LPS   | 14.340000 | 1.000000  | 13.98   |         |         |         |         |         |         |         |         |         |
| 5                     | Title      |           |           |         |         |         |         |         |         |         |         |         |         |
| 6                     | Title      |           |           |         |         |         |         |         |         |         |         |         |         |
| 7                     | Title      |           |           |         |         |         |         |         |         |         |         |         |         |
| 8                     | Title      |           |           |         |         |         |         |         |         |         |         |         |         |
| 9                     | Title      |           |           |         |         |         |         |         |         |         |         |         |         |
| 10                    | Title      |           |           |         |         |         |         |         |         |         |         |         |         |
| 11                    | Title      |           |           |         |         |         |         |         |         |         |         |         |         |
| 12                    | Title      |           |           |         |         |         |         |         |         |         |         |         |         |
| 13                    | Title      |           |           |         |         |         |         |         |         |         |         |         |         |
| 14                    | Title      |           |           |         |         |         |         |         |         |         |         |         |         |
| 15                    | Title      |           |           |         |         |         |         |         |         |         |         |         |         |
| 16                    | Title      |           |           |         |         |         |         |         |         |         |         |         |         |
| 17                    | Title      |           |           |         |         |         |         |         |         |         |         |         |         |
| 18                    | Title      |           |           |         |         |         |         |         |         |         |         |         |         |
| 19                    | Title      |           |           |         |         |         |         |         |         |         |         |         |         |
| 20                    | Title      |           |           |         |         |         |         |         |         |         |         |         |         |
| 21                    | Title      |           |           |         |         |         |         |         |         |         |         |         |         |
| 22                    | Title      |           |           |         |         |         |         |         |         |         |         |         |         |
| 23                    | Title      |           |           |         |         |         |         |         |         |         |         |         |         |
| 24                    | Title      |           |           |         |         |         |         |         |         |         |         |         |         |
| 25                    | Title      |           |           |         |         |         |         |         |         |         |         |         |         |
| 26                    | Title      |           |           |         |         |         |         |         |         |         |         |         |         |
| 27                    | Title      |           |           |         |         |         |         |         |         |         |         |         |         |
| 28                    | Title      |           |           |         |         |         |         |         |         |         |         |         |         |
| 29                    | Title      |           |           |         |         |         |         |         |         |         |         |         |         |

IL1beta

Row --, Column --, Selected: Rows 0, Columns 1

SourceDataforFigure1C — Edited

Prism 8

File Sheet Undo Clipboard Analysis Change Import Draw Write Text Export Print Send LA Help

Q Search

Table format: Grouped

|    |                     | Group A     | Group B     | Group C  | Group D | Group E | Group F | Group G | Group H | Group I | Group J | Group K | Group |
|----|---------------------|-------------|-------------|----------|---------|---------|---------|---------|---------|---------|---------|---------|-------|
|    |                     | Donor 1     | Donor 2     | Donor 3  | Title   | Title   | Title   | Title   | Title   | Title   | Title   | Title   | Title |
|    |                     | Y           | Y           | Y        | Y       | Y       | Y       | Y       | Y       | Y       | Y       | Y       | Y     |
| 1  | IRBCL               | 2.112069    | 2.960000    | 12.28    |         |         |         |         |         |         |         |         |       |
| 2  | IFN $\gamma$ +IRBCL | 7.071839    | 36.340000   | 43.84    |         |         |         |         |         |         |         |         |       |
| 3  | LPS                 | 1435.457000 | 5126.320000 | 10896.21 |         |         |         |         |         |         |         |         |       |
| 4  | IFN $\gamma$ +LPS   | 2782.621000 | 8085.630000 | 15510.43 |         |         |         |         |         |         |         |         |       |
| 5  | Title               |             |             |          |         |         |         |         |         |         |         |         |       |
| 6  | Title               |             |             |          |         |         |         |         |         |         |         |         |       |
| 7  | Title               |             |             |          |         |         |         |         |         |         |         |         |       |
| 8  | Title               |             |             |          |         |         |         |         |         |         |         |         |       |
| 9  | Title               |             |             |          |         |         |         |         |         |         |         |         |       |
| 10 | Title               |             |             |          |         |         |         |         |         |         |         |         |       |
| 11 | Title               |             |             |          |         |         |         |         |         |         |         |         |       |
| 12 | Title               |             |             |          |         |         |         |         |         |         |         |         |       |
| 13 | Title               |             |             |          |         |         |         |         |         |         |         |         |       |
| 14 | Title               |             |             |          |         |         |         |         |         |         |         |         |       |
| 15 | Title               |             |             |          |         |         |         |         |         |         |         |         |       |
| 16 | Title               |             |             |          |         |         |         |         |         |         |         |         |       |
| 17 | Title               |             |             |          |         |         |         |         |         |         |         |         |       |
| 18 | Title               |             |             |          |         |         |         |         |         |         |         |         |       |
| 19 | Title               |             |             |          |         |         |         |         |         |         |         |         |       |
| 20 | Title               |             |             |          |         |         |         |         |         |         |         |         |       |
| 21 | Title               |             |             |          |         |         |         |         |         |         |         |         |       |
| 22 | Title               |             |             |          |         |         |         |         |         |         |         |         |       |
| 23 | Title               |             |             |          |         |         |         |         |         |         |         |         |       |
| 24 | Title               |             |             |          |         |         |         |         |         |         |         |         |       |
| 25 | Title               |             |             |          |         |         |         |         |         |         |         |         |       |
| 26 | Title               |             |             |          |         |         |         |         |         |         |         |         |       |
| 27 | Title               |             |             |          |         |         |         |         |         |         |         |         |       |
| 28 | Title               |             |             |          |         |         |         |         |         |         |         |         |       |
| 29 | Title               |             |             |          |         |         |         |         |         |         |         |         |       |

Family

- IL6
  - Transpose
    - Ordinary one-way ANOVA
  - IL6

Row --, Column --, Selected: Rows 0, Columns 1

SourceDataforFigure1C — Edited

Prism 8

File Sheet Undo Clipboard Analysis Change Import Draw Write Text Export Print Send LA Help

Q Search

Table format: Grouped

|    |            | Group A   | Group B   | Group C | Group D | Group E | Group F | Group G | Group H | Group I | Group J | Group K | Group |
|----|------------|-----------|-----------|---------|---------|---------|---------|---------|---------|---------|---------|---------|-------|
|    |            | Donor 1   | Donor 2   | Donor 3 | Title   | Title   | Title   | Title   | Title   | Title   | Title   | Title   | Title |
|    |            | Y         | Y         | Y       | Y       | Y       | Y       | Y       | Y       | Y       | Y       | Y       | Y     |
| 1  | IRBCL      | 1.000000  | 1.000000  | 2.41    |         |         |         |         |         |         |         |         |       |
| 2  | IFNy+IRBCL | 1.000000  | 1.000000  | 1.00    |         |         |         |         |         |         |         |         |       |
| 3  | LPS        | 13.510000 | 33.740000 | 35.26   |         |         |         |         |         |         |         |         |       |
| 4  | IFNy+LPS   | 6.460000  | 7.600000  | 31.44   |         |         |         |         |         |         |         |         |       |
| 5  | Title      |           |           |         |         |         |         |         |         |         |         |         |       |
| 6  | Title      |           |           |         |         |         |         |         |         |         |         |         |       |
| 7  | Title      |           |           |         |         |         |         |         |         |         |         |         |       |
| 8  | Title      |           |           |         |         |         |         |         |         |         |         |         |       |
| 9  | Title      |           |           |         |         |         |         |         |         |         |         |         |       |
| 10 | Title      |           |           |         |         |         |         |         |         |         |         |         |       |
| 11 | Title      |           |           |         |         |         |         |         |         |         |         |         |       |
| 12 | Title      |           |           |         |         |         |         |         |         |         |         |         |       |
| 13 | Title      |           |           |         |         |         |         |         |         |         |         |         |       |
| 14 | Title      |           |           |         |         |         |         |         |         |         |         |         |       |
| 15 | Title      |           |           |         |         |         |         |         |         |         |         |         |       |
| 16 | Title      |           |           |         |         |         |         |         |         |         |         |         |       |
| 17 | Title      |           |           |         |         |         |         |         |         |         |         |         |       |
| 18 | Title      |           |           |         |         |         |         |         |         |         |         |         |       |
| 19 | Title      |           |           |         |         |         |         |         |         |         |         |         |       |
| 20 | Title      |           |           |         |         |         |         |         |         |         |         |         |       |
| 21 | Title      |           |           |         |         |         |         |         |         |         |         |         |       |
| 22 | Title      |           |           |         |         |         |         |         |         |         |         |         |       |
| 23 | Title      |           |           |         |         |         |         |         |         |         |         |         |       |
| 24 | Title      |           |           |         |         |         |         |         |         |         |         |         |       |
| 25 | Title      |           |           |         |         |         |         |         |         |         |         |         |       |
| 26 | Title      |           |           |         |         |         |         |         |         |         |         |         |       |
| 27 | Title      |           |           |         |         |         |         |         |         |         |         |         |       |
| 28 | Title      |           |           |         |         |         |         |         |         |         |         |         |       |
| 29 | Title      |           |           |         |         |         |         |         |         |         |         |         |       |

▼ Data Tables

- IL1beta
- IL6
- IL10**
- TNF
- New Data Table...

▼ Info

- Project info 1
- Project info 1
- New Info...

▼ Results

- Transpose of IL1beta
- Ordinary one-way ANOVA of Transpose of IL1beta
- Transpose of IL6
- Ordinary one-way ANOVA of Transpose of IL6
- Transpose of IL10**
- Ordinary one-way ANOVA of Transpose of IL10**
- Transpose of TNF

Family

- IL10**
  - Transpose
    - Ordinary one-way ANOVA
  - IL10

IL10

Row --, Column --, Selected: Rows 0, Columns 1

SourceDataforFigure1C — Edited

Prism 8

File Sheet Undo Clipboard Analysis Change Import Draw Write Text Export Print Send LA Help

Q Search

Table format: Grouped

|    |            | Group A    | Group B    | Group C     | Group D | Group E | Group F | Group G | Group H | Group I | Group J | Group K | Group |
|----|------------|------------|------------|-------------|---------|---------|---------|---------|---------|---------|---------|---------|-------|
|    |            | Donor 1    | Donor 2    | Donor 3     | Title   | Title   | Title   | Title   | Title   | Title   | Title   | Title   | Title |
|    |            | Y          | Y          | Y           | Y       | Y       | Y       | Y       | Y       | Y       | Y       | Y       | Y     |
| 1  | IRBCL      | 1.293333   | 6.301137   | 3.094395    |         |         |         |         |         |         |         |         |       |
| 2  | IFNy+IRBCL | 2.926667   | 14.420460  | 5.858407    |         |         |         |         |         |         |         |         |       |
| 3  | LPS        | 381.500000 | 910.409100 | 888.811200  |         |         |         |         |         |         |         |         |       |
| 4  | IFNy+LPS   | 481.196700 | 998.948900 | 1143.826000 |         |         |         |         |         |         |         |         |       |
| 5  | Title      |            |            |             |         |         |         |         |         |         |         |         |       |
| 6  | Title      |            |            |             |         |         |         |         |         |         |         |         |       |
| 7  | Title      |            |            |             |         |         |         |         |         |         |         |         |       |
| 8  | Title      |            |            |             |         |         |         |         |         |         |         |         |       |
| 9  | Title      |            |            |             |         |         |         |         |         |         |         |         |       |
| 10 | Title      |            |            |             |         |         |         |         |         |         |         |         |       |
| 11 | Title      |            |            |             |         |         |         |         |         |         |         |         |       |
| 12 | Title      |            |            |             |         |         |         |         |         |         |         |         |       |
| 13 | Title      |            |            |             |         |         |         |         |         |         |         |         |       |
| 14 | Title      |            |            |             |         |         |         |         |         |         |         |         |       |
| 15 | Title      |            |            |             |         |         |         |         |         |         |         |         |       |
| 16 | Title      |            |            |             |         |         |         |         |         |         |         |         |       |
| 17 | Title      |            |            |             |         |         |         |         |         |         |         |         |       |
| 18 | Title      |            |            |             |         |         |         |         |         |         |         |         |       |
| 19 | Title      |            |            |             |         |         |         |         |         |         |         |         |       |
| 20 | Title      |            |            |             |         |         |         |         |         |         |         |         |       |
| 21 | Title      |            |            |             |         |         |         |         |         |         |         |         |       |
| 22 | Title      |            |            |             |         |         |         |         |         |         |         |         |       |
| 23 | Title      |            |            |             |         |         |         |         |         |         |         |         |       |
| 24 | Title      |            |            |             |         |         |         |         |         |         |         |         |       |
| 25 | Title      |            |            |             |         |         |         |         |         |         |         |         |       |
| 26 | Title      |            |            |             |         |         |         |         |         |         |         |         |       |
| 27 | Title      |            |            |             |         |         |         |         |         |         |         |         |       |
| 28 | Title      |            |            |             |         |         |         |         |         |         |         |         |       |
| 29 | Title      |            |            |             |         |         |         |         |         |         |         |         |       |

▼ Data Tables

- IL1beta
- IL6
- IL10
- TNF**
- New Data Table...

▼ Info

- Project info 1
- Project info 1
- New Info...

▼ Results

- Transpose of IL1beta
- Ordinary one-way ANOVA of Transpose of IL1beta
- Transpose of IL6
- Ordinary one-way ANOVA of Transpose of IL6
- Transpose of IL10
- Ordinary one-way ANOVA of Transpose of IL10
- Transpose of TNF**

Family

- TNF**
  - Transpose
    - Ordinary one-way ANOVA
  - TNF

Row 10, B: Donor 2, Selected: Rows 0, Columns 1

SourceDataforFigure1C — Edited

Prism 8

ANOVA results

Multiple comparisons

Search

Data Tables

- IL1beta
- IL6
- IL10
- TNF
- New Data Table...

Info

- Project info 1
- Project info 1
- New Info...

Results

- Transpose of IL1beta
- Ordinary one-way ANOVA of Transpose of IL1beta**
- Transpose of IL6
- Ordinary one-way ANOVA of Transpose of IL6
- Transpose of IL10
- Ordinary one-way ANOVA of Transpose of IL10
- Transpose of TNF

Family

- IL1beta
- Transpose
- Ordinary one-way ANOVA**

| Ordinary one-way ANOVA |                                             | ANOVA results        |           |           |                     |                |
|------------------------|---------------------------------------------|----------------------|-----------|-----------|---------------------|----------------|
| 1                      | Table Analyzed                              | Transpose of IL1beta |           |           |                     |                |
| 2                      | Data sets analyzed                          | A-D                  |           |           |                     |                |
| 3                      |                                             |                      |           |           |                     |                |
| 4                      | <b>ANOVA summary</b>                        |                      |           |           |                     |                |
| 5                      | F                                           | 17.89                |           |           |                     |                |
| 6                      | P value                                     | 0.0007               |           |           |                     |                |
| 7                      | P value summary                             | ***                  |           |           |                     |                |
| 8                      | Significant diff. among means (P < 0.05)?   | Yes                  |           |           |                     |                |
| 9                      | R square                                    | 0.8703               |           |           |                     |                |
| 10                     |                                             |                      |           |           |                     |                |
| 11                     | <b>Brown-Forsythe test</b>                  |                      |           |           |                     |                |
| 12                     | F (DFn, DFd)                                | 0.9006 (3, 8)        |           |           |                     |                |
| 13                     | P value                                     | 0.4821               |           |           |                     |                |
| 14                     | P value summary                             | ns                   |           |           |                     |                |
| 15                     | Are SDs significantly different (P < 0.05)? | No                   |           |           |                     |                |
| 16                     |                                             |                      |           |           |                     |                |
| 17                     | <b>Bartlett's test</b>                      |                      |           |           |                     |                |
| 18                     | Bartlett's statistic (corrected)            |                      |           |           |                     |                |
| 19                     | P value                                     |                      |           |           |                     |                |
| 20                     | P value summary                             |                      |           |           |                     |                |
| 21                     | Are SDs significantly different (P < 0.05)? |                      |           |           |                     |                |
| 22                     |                                             |                      |           |           |                     |                |
| 23                     | <b>ANOVA table</b>                          | <b>SS</b>            | <b>DF</b> | <b>MS</b> | <b>F (DFn, DFd)</b> | <b>P value</b> |
| 24                     | Treatment (between columns)                 | 1096                 | 3         | 365.4     | F (3, 8) = 17.89    | P=0.0007       |
| 25                     | Residual (within columns)                   | 163.4                | 8         | 20.43     |                     |                |
| 26                     | Total                                       | 1260                 | 11        |           |                     |                |
| 27                     |                                             |                      |           |           |                     |                |
| 28                     | <b>Data summary</b>                         |                      |           |           |                     |                |

Ordinary one-way ANOVA of Transpose of IL1beta

Row 16, Column RT

SourceDataforFigure1C — Edited

Prism 8

File Sheet Undo Clipboard Analysis Interpret Change Draw Write Text Export Print Send LA Help

12 Helvetica

Q Search

▼ Data Tables

- IL1beta
- IL6
- IL10
- TNF
- New Data Table...

▼ Info

- Project info 1
- Project info 1
- New Info...

▼ Results

- Transpose of IL1beta
- Ordinary one-way ANOVA of Transpose of IL1beta
- Transpose of IL6
- Ordinary one-way ANOVA of Transpose of IL6
- Transpose of IL10
- Ordinary one-way ANOVA of Transpose of IL10
- Transpose of TNF

Family

- IL1beta
- Transpose
- Ordinary one-way ANOVA

| Transpose |         | A     | B          | C      | D        | E     | F     | G     | H     | I     | J     | K     | L     |
|-----------|---------|-------|------------|--------|----------|-------|-------|-------|-------|-------|-------|-------|-------|
|           |         | iRBCL | IFNy+iRBCL | LPS    | IFNy+LPS | Title | Title | Title | Title | Title | Title | Title | Title |
| 1         | Donor 1 | 1.000 | 1.000      | 22.810 | 14.340   | Y     | Y     | Y     | Y     | Y     | Y     | Y     | Y     |
| 2         | Donor 2 | 1.000 | 1.000      | 29.880 | 1.000    |       |       |       |       |       |       |       |       |
| 3         | Donor 3 | 1.000 | 1.000      | 20.480 | 13.980   |       |       |       |       |       |       |       |       |
| 4         |         |       |            |        |          |       |       |       |       |       |       |       |       |
| 5         |         |       |            |        |          |       |       |       |       |       |       |       |       |
| 6         |         |       |            |        |          |       |       |       |       |       |       |       |       |
| 7         |         |       |            |        |          |       |       |       |       |       |       |       |       |
| 8         |         |       |            |        |          |       |       |       |       |       |       |       |       |
| 9         |         |       |            |        |          |       |       |       |       |       |       |       |       |
| 10        |         |       |            |        |          |       |       |       |       |       |       |       |       |
| 11        |         |       |            |        |          |       |       |       |       |       |       |       |       |
| 12        |         |       |            |        |          |       |       |       |       |       |       |       |       |
| 13        |         |       |            |        |          |       |       |       |       |       |       |       |       |
| 14        |         |       |            |        |          |       |       |       |       |       |       |       |       |
| 15        |         |       |            |        |          |       |       |       |       |       |       |       |       |
| 16        |         |       |            |        |          |       |       |       |       |       |       |       |       |
| 17        |         |       |            |        |          |       |       |       |       |       |       |       |       |
| 18        |         |       |            |        |          |       |       |       |       |       |       |       |       |
| 19        |         |       |            |        |          |       |       |       |       |       |       |       |       |
| 20        |         |       |            |        |          |       |       |       |       |       |       |       |       |
| 21        |         |       |            |        |          |       |       |       |       |       |       |       |       |
| 22        |         |       |            |        |          |       |       |       |       |       |       |       |       |
| 23        |         |       |            |        |          |       |       |       |       |       |       |       |       |
| 24        |         |       |            |        |          |       |       |       |       |       |       |       |       |
| 25        |         |       |            |        |          |       |       |       |       |       |       |       |       |
| 26        |         |       |            |        |          |       |       |       |       |       |       |       |       |
| 27        |         |       |            |        |          |       |       |       |       |       |       |       |       |
| 28        |         |       |            |        |          |       |       |       |       |       |       |       |       |
| 29        |         |       |            |        |          |       |       |       |       |       |       |       |       |

Transpose of IL1beta

Row 1, A: iRBCL

SourceDataforFigure1C — Edited

File Sheet Undo Clipboard Analysis Interpret Change Draw Write Text Export Print Send LA Help

Prism8

Q Search

ANOVA results Multiple comparisons

Data Tables

- IL1beta
- IL6
- IL10
- TNF
- New Data Table...

Info

- Project info 1
- Project info 1
- New Info...

Results

- Transpose of IL1beta
- Ordinary one-way ANOVA of Transpose of IL1beta**
- Transpose of IL6
- Ordinary one-way ANOVA of Transpose of IL6
- Transpose of IL10
- Ordinary one-way ANOVA of Transpose of IL10
- Transpose of TNF

Family

- IL1beta
- Transpose
- Ordinary one-way ANOVA**

| Ordinary one-way ANOVA |                                          |                   |                           |                     |                    |                         |           |          |           |
|------------------------|------------------------------------------|-------------------|---------------------------|---------------------|--------------------|-------------------------|-----------|----------|-----------|
| Multiple comparisons   |                                          |                   |                           |                     |                    |                         |           |          |           |
| 1                      | Number of families                       | 1                 |                           |                     |                    |                         |           |          |           |
| 2                      | Number of comparisons per family         | 2                 |                           |                     |                    |                         |           |          |           |
| 3                      | Alpha                                    | 0.05              |                           |                     |                    |                         |           |          |           |
| 4                      |                                          |                   |                           |                     |                    |                         |           |          |           |
| 5                      | <b>Sidak's multiple comparisons test</b> | <b>Mean Diff.</b> | <b>95.00% CI of diff.</b> | <b>Significant?</b> | <b>Summary</b>     | <b>Adjusted P Value</b> |           |          |           |
| 6                      | iRBCL vs. IFN $\gamma$ +iRBCL            | 0.000             | -10.12 to 10.12           | No                  | ns                 | >0.9999 A-B             |           |          |           |
| 7                      | LPS vs. IFN $\gamma$ +LPS                | 14.62             | 4.492 to 24.74            | Yes                 | **                 | 0.0083 C-D              |           |          |           |
| 8                      |                                          |                   |                           |                     |                    |                         |           |          |           |
| 9                      | <b>Test details</b>                      | <b>Mean 1</b>     | <b>Mean 2</b>             | <b>Mean Diff.</b>   | <b>SE of diff.</b> | <b>n1</b>               | <b>n2</b> | <b>t</b> | <b>DF</b> |
| 10                     | iRBCL vs. IFN $\gamma$ +iRBCL            | 1.000             | 1.000                     | 0.000               | 3.691              | 3                       | 3         | 0.000    | 8         |
| 11                     | LPS vs. IFN $\gamma$ +LPS                | 24.39             | 9.773                     | 14.62               | 3.691              | 3                       | 3         | 3.961    | 8         |
| 12                     |                                          |                   |                           |                     |                    |                         |           |          |           |
| 13                     |                                          |                   |                           |                     |                    |                         |           |          |           |
| 14                     |                                          |                   |                           |                     |                    |                         |           |          |           |
| 15                     |                                          |                   |                           |                     |                    |                         |           |          |           |
| 16                     |                                          |                   |                           |                     |                    |                         |           |          |           |
| 17                     |                                          |                   |                           |                     |                    |                         |           |          |           |
| 18                     |                                          |                   |                           |                     |                    |                         |           |          |           |
| 19                     |                                          |                   |                           |                     |                    |                         |           |          |           |
| 20                     |                                          |                   |                           |                     |                    |                         |           |          |           |
| 21                     |                                          |                   |                           |                     |                    |                         |           |          |           |
| 22                     |                                          |                   |                           |                     |                    |                         |           |          |           |
| 23                     |                                          |                   |                           |                     |                    |                         |           |          |           |
| 24                     |                                          |                   |                           |                     |                    |                         |           |          |           |
| 25                     |                                          |                   |                           |                     |                    |                         |           |          |           |
| 26                     |                                          |                   |                           |                     |                    |                         |           |          |           |
| 27                     |                                          |                   |                           |                     |                    |                         |           |          |           |
| 28                     |                                          |                   |                           |                     |                    |                         |           |          |           |

Ordinary one-way ANOVA of Transpose of IL1beta Row 16, Column RT

SourceDataforFigure1C — Edited

File Sheet Undo Clipboard Analysis Interpret Change Draw Write Text Export Print Send LA Help

Prism8

Q Search ANOVA results Multiple comparisons

▼ Data Tables

- IL1beta
- IL6
- IL10
- TNF
- + New Data Table...

▼ Info

- Project info 1
- Project info 1
- + New Info...

▼ Results

- Transpose of IL1beta
- Ordinary one-way ANOVA of Transpose of IL1beta
- Transpose of IL6
- Ordinary one-way ANOVA of Transpose of IL6**
- Transpose of IL10
- Ordinary one-way ANOVA of Transpose of IL10
- Transpose of TNF

Family

- IL6
  - Transpose
  - Ordinary one-way ANOVA

| Ordinary one-way ANOVA |                                             | ANOVA results    |           |           |                     |                |
|------------------------|---------------------------------------------|------------------|-----------|-----------|---------------------|----------------|
| 1                      | Table Analyzed                              | Transpose of IL6 |           |           |                     |                |
| 2                      | Data sets analyzed                          | A-D              |           |           |                     |                |
| 3                      |                                             |                  |           |           |                     |                |
| 4                      | <b>ANOVA summary</b>                        |                  |           |           |                     |                |
| 5                      | F                                           | 3.619            |           |           |                     |                |
| 6                      | P value                                     | 0.0647           |           |           |                     |                |
| 7                      | P value summary                             | ns               |           |           |                     |                |
| 8                      | Significant diff. among means (P < 0.05)?   | No               |           |           |                     |                |
| 9                      | R square                                    | 0.5757           |           |           |                     |                |
| 10                     |                                             |                  |           |           |                     |                |
| 11                     | <b>Brown-Forsythe test</b>                  |                  |           |           |                     |                |
| 12                     | F (DFn, DFd)                                | 2.454 (3, 8)     |           |           |                     |                |
| 13                     | P value                                     | 0.1379           |           |           |                     |                |
| 14                     | P value summary                             | ns               |           |           |                     |                |
| 15                     | Are SDs significantly different (P < 0.05)? | No               |           |           |                     |                |
| 16                     |                                             |                  |           |           |                     |                |
| 17                     | <b>Bartlett's test</b>                      |                  |           |           |                     |                |
| 18                     | Bartlett's statistic (corrected)            |                  |           |           |                     |                |
| 19                     | P value                                     |                  |           |           |                     |                |
| 20                     | P value summary                             |                  |           |           |                     |                |
| 21                     | Are SDs significantly different (P < 0.05)? |                  |           |           |                     |                |
| 22                     |                                             |                  |           |           |                     |                |
| 23                     | <b>ANOVA table</b>                          | <b>SS</b>        | <b>DF</b> | <b>MS</b> | <b>F (DFn, DFd)</b> | <b>P value</b> |
| 24                     | Treatment (between columns)                 | 172638397        | 3         | 57546132  | F (3, 8) = 3.619    | P=0.0647       |
| 25                     | Residual (within columns)                   | 127223028        | 8         | 15902879  |                     |                |
| 26                     | Total                                       | 299861425        | 11        |           |                     |                |
| 27                     |                                             |                  |           |           |                     |                |
| 28                     | <b>Data summary</b>                         |                  |           |           |                     |                |

Ordinary one-way ANOVA of Transpose of IL6 Row 1, Column A



SourceDataforFigure1C — Edited

Prism 8

File Sheet Undo Clipboard Analysis Interpret Change Draw Write Text Export Print Send LA Help

12 Helvetica

Search

▼ Data Tables

- IL1beta
- IL6
- IL10
- TNF
- + New Data Table...

▼ Info

- Project info 1
- Project info 1
- + New Info...

▼ Results

- Transpose of IL1beta
- Ordinary one-way ANOVA of Transpose of IL1beta
- Transpose of IL6**
- Ordinary one-way ANOVA of Transpose of IL6
- Transpose of IL10
- Ordinary one-way ANOVA of Transpose of IL10
- Transpose of TNF

Family

- IL6
- Transpose
- Ordinary one-way ANOVA

| Transpose |         | A      | B          | C         | D         | E     | F     | G     | H     | I     | J     | K     | L     |
|-----------|---------|--------|------------|-----------|-----------|-------|-------|-------|-------|-------|-------|-------|-------|
|           |         | iRBCL  | IFNy+iRBCL | LPS       | IFNy+LPS  | Title | Title | Title | Title | Title | Title | Title | Title |
| 1         | Donor 1 | 2.112  | 7.072      | 1435.457  | 2782.621  | Y     | Y     | Y     | Y     | Y     | Y     | Y     | Y     |
| 2         | Donor 2 | 2.960  | 36.340     | 5126.320  | 8085.630  |       |       |       |       |       |       |       |       |
| 3         | Donor 3 | 12.280 | 43.840     | 10896.210 | 15510.430 |       |       |       |       |       |       |       |       |
| 4         |         |        |            |           |           |       |       |       |       |       |       |       |       |
| 5         |         |        |            |           |           |       |       |       |       |       |       |       |       |
| 6         |         |        |            |           |           |       |       |       |       |       |       |       |       |
| 7         |         |        |            |           |           |       |       |       |       |       |       |       |       |
| 8         |         |        |            |           |           |       |       |       |       |       |       |       |       |
| 9         |         |        |            |           |           |       |       |       |       |       |       |       |       |
| 10        |         |        |            |           |           |       |       |       |       |       |       |       |       |
| 11        |         |        |            |           |           |       |       |       |       |       |       |       |       |
| 12        |         |        |            |           |           |       |       |       |       |       |       |       |       |
| 13        |         |        |            |           |           |       |       |       |       |       |       |       |       |
| 14        |         |        |            |           |           |       |       |       |       |       |       |       |       |
| 15        |         |        |            |           |           |       |       |       |       |       |       |       |       |
| 16        |         |        |            |           |           |       |       |       |       |       |       |       |       |
| 17        |         |        |            |           |           |       |       |       |       |       |       |       |       |
| 18        |         |        |            |           |           |       |       |       |       |       |       |       |       |
| 19        |         |        |            |           |           |       |       |       |       |       |       |       |       |
| 20        |         |        |            |           |           |       |       |       |       |       |       |       |       |
| 21        |         |        |            |           |           |       |       |       |       |       |       |       |       |
| 22        |         |        |            |           |           |       |       |       |       |       |       |       |       |
| 23        |         |        |            |           |           |       |       |       |       |       |       |       |       |
| 24        |         |        |            |           |           |       |       |       |       |       |       |       |       |
| 25        |         |        |            |           |           |       |       |       |       |       |       |       |       |
| 26        |         |        |            |           |           |       |       |       |       |       |       |       |       |
| 27        |         |        |            |           |           |       |       |       |       |       |       |       |       |
| 28        |         |        |            |           |           |       |       |       |       |       |       |       |       |
| 29        |         |        |            |           |           |       |       |       |       |       |       |       |       |

Transpose of IL6

Row 1, A: iRBCL

SourceDataforFigure1C — Edited

Prism 8

File Sheet Undo Clipboard Analysis Interpret Change Draw Write Text Export Print Send LA Help

12 Helvetica

Q Search

▼ Data Tables

- IL1beta
- IL6
- IL10**
- TNF
- New Data Table...

▼ Info

- Project info 1
- Project info 1
- New Info...

▼ Results

- Transpose of IL1beta
- Ordinary one-way ANOVA of Transpose of IL1beta
- Transpose of IL6
- Ordinary one-way ANOVA of Transpose of IL6
- Transpose of IL10**
- Ordinary one-way ANOVA of Transpose of IL10
- Transpose of TNF

Family

- IL10
- Transpose**
- Ordinary one-way ANOVA

| Transpose |         | A     | B          | C      | D        | E     | F     | G     | H     | I     | J     | K     | L     |
|-----------|---------|-------|------------|--------|----------|-------|-------|-------|-------|-------|-------|-------|-------|
|           |         | iRBCL | IFNy+iRBCL | LPS    | IFNy+LPS | Title | Title | Title | Title | Title | Title | Title | Title |
| 1         | Donor 1 | 1.000 | 1.000      | 13.510 | 6.460    | Y     | Y     | Y     | Y     | Y     | Y     | Y     | Y     |
| 2         | Donor 2 | 1.000 | 1.000      | 33.740 | 7.600    |       |       |       |       |       |       |       |       |
| 3         | Donor 3 | 2.410 | 1.000      | 35.260 | 31.440   |       |       |       |       |       |       |       |       |
| 4         |         |       |            |        |          |       |       |       |       |       |       |       |       |
| 5         |         |       |            |        |          |       |       |       |       |       |       |       |       |
| 6         |         |       |            |        |          |       |       |       |       |       |       |       |       |
| 7         |         |       |            |        |          |       |       |       |       |       |       |       |       |
| 8         |         |       |            |        |          |       |       |       |       |       |       |       |       |
| 9         |         |       |            |        |          |       |       |       |       |       |       |       |       |
| 10        |         |       |            |        |          |       |       |       |       |       |       |       |       |
| 11        |         |       |            |        |          |       |       |       |       |       |       |       |       |
| 12        |         |       |            |        |          |       |       |       |       |       |       |       |       |
| 13        |         |       |            |        |          |       |       |       |       |       |       |       |       |
| 14        |         |       |            |        |          |       |       |       |       |       |       |       |       |
| 15        |         |       |            |        |          |       |       |       |       |       |       |       |       |
| 16        |         |       |            |        |          |       |       |       |       |       |       |       |       |
| 17        |         |       |            |        |          |       |       |       |       |       |       |       |       |
| 18        |         |       |            |        |          |       |       |       |       |       |       |       |       |
| 19        |         |       |            |        |          |       |       |       |       |       |       |       |       |
| 20        |         |       |            |        |          |       |       |       |       |       |       |       |       |
| 21        |         |       |            |        |          |       |       |       |       |       |       |       |       |
| 22        |         |       |            |        |          |       |       |       |       |       |       |       |       |
| 23        |         |       |            |        |          |       |       |       |       |       |       |       |       |
| 24        |         |       |            |        |          |       |       |       |       |       |       |       |       |
| 25        |         |       |            |        |          |       |       |       |       |       |       |       |       |
| 26        |         |       |            |        |          |       |       |       |       |       |       |       |       |
| 27        |         |       |            |        |          |       |       |       |       |       |       |       |       |
| 28        |         |       |            |        |          |       |       |       |       |       |       |       |       |
| 29        |         |       |            |        |          |       |       |       |       |       |       |       |       |

Transpose of IL10

Row 1, A: iRBCL

SourceDataforFigure1C — Edited

Prism8

ANOVA results

Multiple comparisons

Ordinary one-way ANOVA  
ANOVA results

|    |                                             |                                                            |
|----|---------------------------------------------|------------------------------------------------------------|
| 1  | Table Analyzed                              | Transpose of IL10                                          |
| 2  | Data sets analyzed                          | A-D                                                        |
| 3  |                                             |                                                            |
| 4  | <b>ANOVA summary</b>                        |                                                            |
| 5  | F                                           | 5.535                                                      |
| 6  | P value                                     | 0.0236                                                     |
| 7  | P value summary                             | *                                                          |
| 8  | Significant diff. among means (P < 0.05)?   | Yes                                                        |
| 9  | R square                                    | 0.6749                                                     |
| 10 |                                             |                                                            |
| 11 | <b>Brown-Forsythe test</b>                  |                                                            |
| 12 | F (DFn, DFd)                                | 0.7489 (3, 8)                                              |
| 13 | P value                                     | 0.5529                                                     |
| 14 | P value summary                             | ns                                                         |
| 15 | Are SDs significantly different (P < 0.05)? | No                                                         |
| 16 |                                             |                                                            |
| 17 | <b>Bartlett's test</b>                      |                                                            |
| 18 | Bartlett's statistic (corrected)            |                                                            |
| 19 | P value                                     |                                                            |
| 20 | P value summary                             |                                                            |
| 21 | Are SDs significantly different (P < 0.05)? |                                                            |
| 22 |                                             |                                                            |
| 23 | <b>ANOVA table</b>                          |                                                            |
| 24 | Treatment (between columns)                 | SS      DF      MS      F (DFn, DFd)      P value          |
| 25 | Residual (within columns)                   | 1441      3      480.2      F (3, 8) = 5.535      P=0.0236 |
| 26 | Total                                       | 694.1      8      86.76                                    |
| 27 |                                             | 2135      11                                               |
| 28 | <b>Data summary</b>                         |                                                            |

Ordinary one-way ANOVA of Transpose of IL10

Row 1, Column A

SourceDataforFigure1C — Edited

File Sheet Undo Clipboard Analysis Interpret Change Draw Write Text Export Print Send LA Help

Prism8

Search

ANOVA results Multiple comparisons

**Ordinary one-way ANOVA**  
 Multiple comparisons

|    |                                          |                   |                           |                     |                    |                         |           |          |           |
|----|------------------------------------------|-------------------|---------------------------|---------------------|--------------------|-------------------------|-----------|----------|-----------|
| 1  | Number of families                       | 1                 |                           |                     |                    |                         |           |          |           |
| 2  | Number of comparisons per family         | 2                 |                           |                     |                    |                         |           |          |           |
| 3  | Alpha                                    | 0.05              |                           |                     |                    |                         |           |          |           |
| 4  |                                          |                   |                           |                     |                    |                         |           |          |           |
| 5  | <b>Sidak's multiple comparisons test</b> | <b>Mean Diff.</b> | <b>95.00% CI of diff.</b> | <b>Significant?</b> | <b>Summary</b>     | <b>Adjusted P Value</b> |           |          |           |
| 6  | iRBCL vs. IFN $\gamma$ +iRBCL            | -23.30            | -8956 to 8909             | No                  | ns                 | >0.9999                 |           | A-B      |           |
| 7  | LPS vs. IFN $\gamma$ +LPS                | -2974             | -11906 to 5959            | No                  | ns                 | 0.6252                  |           | C-D      |           |
| 8  |                                          |                   |                           |                     |                    |                         |           |          |           |
| 9  | <b>Test details</b>                      | <b>Mean 1</b>     | <b>Mean 2</b>             | <b>Mean Diff.</b>   | <b>SE of diff.</b> | <b>n1</b>               | <b>n2</b> | <b>t</b> | <b>DF</b> |
| 10 | iRBCL vs. IFN $\gamma$ +iRBCL            | 5.784             | 29.08                     | -23.30              | 3256               | 3                       | 3         | 0.007156 | 8         |
| 11 | LPS vs. IFN $\gamma$ +LPS                | 5819              | 8793                      | -2974               | 3256               | 3                       | 3         | 0.9132   | 8         |
| 12 |                                          |                   |                           |                     |                    |                         |           |          |           |
| 13 |                                          |                   |                           |                     |                    |                         |           |          |           |
| 14 |                                          |                   |                           |                     |                    |                         |           |          |           |
| 15 |                                          |                   |                           |                     |                    |                         |           |          |           |
| 16 |                                          |                   |                           |                     |                    |                         |           |          |           |
| 17 |                                          |                   |                           |                     |                    |                         |           |          |           |
| 18 |                                          |                   |                           |                     |                    |                         |           |          |           |
| 19 |                                          |                   |                           |                     |                    |                         |           |          |           |
| 20 |                                          |                   |                           |                     |                    |                         |           |          |           |
| 21 |                                          |                   |                           |                     |                    |                         |           |          |           |
| 22 |                                          |                   |                           |                     |                    |                         |           |          |           |
| 23 |                                          |                   |                           |                     |                    |                         |           |          |           |
| 24 |                                          |                   |                           |                     |                    |                         |           |          |           |
| 25 |                                          |                   |                           |                     |                    |                         |           |          |           |
| 26 |                                          |                   |                           |                     |                    |                         |           |          |           |
| 27 |                                          |                   |                           |                     |                    |                         |           |          |           |
| 28 |                                          |                   |                           |                     |                    |                         |           |          |           |

Family

- IL6
  - Transpose
    - Ordinary one-way ANOVA

Ordinary one-way ANOVA of Transpose of IL6 Row 1, Column A

SourceDataforFigure1C — Edited

Prism 8

File Sheet Undo Clipboard Analysis Interpret Change Draw Write Text Export Print Send LA Help

Q Search

ANOVA results Multiple comparisons

▼ Data Tables

- IL1beta
- IL6
- IL10**
- TNF
- New Data Table...

▼ Info

- Project info 1
- Project info 1
- New Info...

▼ Results

- Transpose of IL1beta
- Ordinary one-way ANOVA of Transpose of IL1beta
- Transpose of IL6
- Ordinary one-way ANOVA of Transpose of IL6
- Transpose of IL10
- Ordinary one-way ANOVA of Transpose of IL10**
- Transpose of TNF

Family

- IL10
  - Transpose
    - Ordinary one-way ANOVA**

| Ordinary one-way ANOVA            |                                  | Multiple comparisons |                    |              |             |                  |    |         |    |
|-----------------------------------|----------------------------------|----------------------|--------------------|--------------|-------------|------------------|----|---------|----|
| 1                                 | Number of families               | 1                    |                    |              |             |                  |    |         |    |
| 2                                 | Number of comparisons per family | 2                    |                    |              |             |                  |    |         |    |
| 3                                 | Alpha                            | 0.05                 |                    |              |             |                  |    |         |    |
| 4                                 |                                  |                      |                    |              |             |                  |    |         |    |
| Sidak's multiple comparisons test |                                  | Mean Diff.           | 95.00% CI of diff. | Significant? | Summary     | Adjusted P Value |    |         |    |
| 6                                 | iRBCL vs. IFN $\gamma$ +iRBCL    | 0.4700               | -20.39 to 21.33    | No           | ns          | 0.9977 A-B       |    |         |    |
| 7                                 | LPS vs. IFN $\gamma$ +LPS        | 12.34                | -8.527 to 33.20    | No           | ns          | 0.2663 C-D       |    |         |    |
| 8                                 |                                  |                      |                    |              |             |                  |    |         |    |
| Test details                      |                                  | Mean 1               | Mean 2             | Mean Diff.   | SE of diff. | n1               | n2 | t       | DF |
| 10                                | iRBCL vs. IFN $\gamma$ +iRBCL    | 1.470                | 1.000              | 0.4700       | 7.605       | 3                | 3  | 0.06180 | 8  |
| 11                                | LPS vs. IFN $\gamma$ +LPS        | 27.50                | 15.17              | 12.34        | 7.605       | 3                | 3  | 1.622   | 8  |
| 12                                |                                  |                      |                    |              |             |                  |    |         |    |
| 13                                |                                  |                      |                    |              |             |                  |    |         |    |
| 14                                |                                  |                      |                    |              |             |                  |    |         |    |
| 15                                |                                  |                      |                    |              |             |                  |    |         |    |
| 16                                |                                  |                      |                    |              |             |                  |    |         |    |
| 17                                |                                  |                      |                    |              |             |                  |    |         |    |
| 18                                |                                  |                      |                    |              |             |                  |    |         |    |
| 19                                |                                  |                      |                    |              |             |                  |    |         |    |
| 20                                |                                  |                      |                    |              |             |                  |    |         |    |
| 21                                |                                  |                      |                    |              |             |                  |    |         |    |
| 22                                |                                  |                      |                    |              |             |                  |    |         |    |
| 23                                |                                  |                      |                    |              |             |                  |    |         |    |
| 24                                |                                  |                      |                    |              |             |                  |    |         |    |
| 25                                |                                  |                      |                    |              |             |                  |    |         |    |
| 26                                |                                  |                      |                    |              |             |                  |    |         |    |
| 27                                |                                  |                      |                    |              |             |                  |    |         |    |
| 28                                |                                  |                      |                    |              |             |                  |    |         |    |

Ordinary one-way ANOVA of Transpose of IL10 Row 1, Column A

SourceDataforFigure1C — Edited

File Sheet Undo Clipboard Analysis Interpret Change Draw Write Text Export Print Send LA Help

Prism 8

Q Search ANOVA results Multiple comparisons

▼ Data Tables

▼ Info

- Project info 1
- Project info 1
- New Info...

▼ Results

- Transpose of IL1beta
- Ordinary one-way ANOVA of Transpose of IL1beta
- Transpose of IL6
- Ordinary one-way ANOVA of Transpose of IL6
- Transpose of IL10
- Ordinary one-way ANOVA of Transpose of IL10
- Transpose of TNF
- Ordinary one-way ANOVA of Transpose of TNF**
- New Analysis...

▼ Graphs

- IL1beta

Family

- TNF
  - Transpose
    - Ordinary one-way ANOVA**

| Ordinary one-way ANOVA |                                             | ANOVA results    |           |           |                     |                |
|------------------------|---------------------------------------------|------------------|-----------|-----------|---------------------|----------------|
| 1                      | Table Analyzed                              | Transpose of TNF |           |           |                     |                |
| 2                      | Data sets analyzed                          | A-D              |           |           |                     |                |
| 3                      |                                             |                  |           |           |                     |                |
| 4                      | <b>ANOVA summary</b>                        |                  |           |           |                     |                |
| 5                      | F                                           | 12.19            |           |           |                     |                |
| 6                      | P value                                     | 0.0024           |           |           |                     |                |
| 7                      | P value summary                             | **               |           |           |                     |                |
| 8                      | Significant diff. among means (P < 0.05)?   | Yes              |           |           |                     |                |
| 9                      | R square                                    | 0.8205           |           |           |                     |                |
| 10                     |                                             |                  |           |           |                     |                |
| 11                     | <b>Brown-Forsythe test</b>                  |                  |           |           |                     |                |
| 12                     | F (DFn, DFd)                                | 1.024 (3, 8)     |           |           |                     |                |
| 13                     | P value                                     | 0.4317           |           |           |                     |                |
| 14                     | P value summary                             | ns               |           |           |                     |                |
| 15                     | Are SDs significantly different (P < 0.05)? | No               |           |           |                     |                |
| 16                     |                                             |                  |           |           |                     |                |
| 17                     | <b>Bartlett's test</b>                      |                  |           |           |                     |                |
| 18                     | Bartlett's statistic (corrected)            |                  |           |           |                     |                |
| 19                     | P value                                     |                  |           |           |                     |                |
| 20                     | P value summary                             |                  |           |           |                     |                |
| 21                     | Are SDs significantly different (P < 0.05)? |                  |           |           |                     |                |
| 22                     |                                             |                  |           |           |                     |                |
| 23                     | <b>ANOVA table</b>                          | <b>SS</b>        | <b>DF</b> | <b>MS</b> | <b>F (DFn, DFd)</b> | <b>P value</b> |
| 24                     | Treatment (between columns)                 | 1929480          | 3         | 643160    | F (3, 8) = 12.19    | P=0.0024       |
| 25                     | Residual (within columns)                   | 421988           | 8         | 52748     |                     |                |
| 26                     | Total                                       | 2351468          | 11        |           |                     |                |
| 27                     |                                             |                  |           |           |                     |                |
| 28                     | <b>Data summary</b>                         |                  |           |           |                     |                |

Ordinary one-way ANOVA of Transpose of TNF Row 1, Column A

SourceDataforFigure1C — Edited

Prism 8

File Sheet Undo Clipboard Analysis Interpret Change Draw Write Text Export Print Send LA Help

12 Helvetica

Search

Data Tables

- Info
  - Project info 1
  - Project info 1
  - New Info...
- Results
  - Transpose of IL1beta
  - Ordinary one-way ANOVA of Transpose of IL1beta
  - Transpose of IL6
  - Ordinary one-way ANOVA of Transpose of IL6
  - Transpose of IL10
  - Ordinary one-way ANOVA of Transpose of IL10
  - Transpose of TNF**
  - Ordinary one-way ANOVA of Transpose of TNF
  - New Analysis...
- Graphs
  - IL1beta

Family

- TNF
  - Transpose**
  - Ordinary one-way ANOVA

|    | Transpose | A     | B          | C       | D        | E     | F     | G     | H     | I     | J     | K     | L     |
|----|-----------|-------|------------|---------|----------|-------|-------|-------|-------|-------|-------|-------|-------|
|    |           | iRBCL | IFNy+iRBCL | LPS     | IFNy+LPS | Title | Title | Title | Title | Title | Title | Title | Title |
| 1  | Donor 1   | 1.293 | 2.927      | 381.500 | 481.197  | Y     | Y     | Y     | Y     | Y     | Y     | Y     | Y     |
| 2  | Donor 2   | 6.301 | 14.420     | 910.409 | 998.949  |       |       |       |       |       |       |       |       |
| 3  | Donor 3   | 3.094 | 5.858      | 888.811 | 1143.826 |       |       |       |       |       |       |       |       |
| 4  |           |       |            |         |          |       |       |       |       |       |       |       |       |
| 5  |           |       |            |         |          |       |       |       |       |       |       |       |       |
| 6  |           |       |            |         |          |       |       |       |       |       |       |       |       |
| 7  |           |       |            |         |          |       |       |       |       |       |       |       |       |
| 8  |           |       |            |         |          |       |       |       |       |       |       |       |       |
| 9  |           |       |            |         |          |       |       |       |       |       |       |       |       |
| 10 |           |       |            |         |          |       |       |       |       |       |       |       |       |
| 11 |           |       |            |         |          |       |       |       |       |       |       |       |       |
| 12 |           |       |            |         |          |       |       |       |       |       |       |       |       |
| 13 |           |       |            |         |          |       |       |       |       |       |       |       |       |
| 14 |           |       |            |         |          |       |       |       |       |       |       |       |       |
| 15 |           |       |            |         |          |       |       |       |       |       |       |       |       |
| 16 |           |       |            |         |          |       |       |       |       |       |       |       |       |
| 17 |           |       |            |         |          |       |       |       |       |       |       |       |       |
| 18 |           |       |            |         |          |       |       |       |       |       |       |       |       |
| 19 |           |       |            |         |          |       |       |       |       |       |       |       |       |
| 20 |           |       |            |         |          |       |       |       |       |       |       |       |       |
| 21 |           |       |            |         |          |       |       |       |       |       |       |       |       |
| 22 |           |       |            |         |          |       |       |       |       |       |       |       |       |
| 23 |           |       |            |         |          |       |       |       |       |       |       |       |       |
| 24 |           |       |            |         |          |       |       |       |       |       |       |       |       |
| 25 |           |       |            |         |          |       |       |       |       |       |       |       |       |
| 26 |           |       |            |         |          |       |       |       |       |       |       |       |       |
| 27 |           |       |            |         |          |       |       |       |       |       |       |       |       |
| 28 |           |       |            |         |          |       |       |       |       |       |       |       |       |
| 29 |           |       |            |         |          |       |       |       |       |       |       |       |       |

Transpose of TNF

Row 1, A: iRBCL

SourceDataforFigure1C — Edited

File Sheet Undo Clipboard Analysis Interpret Change Draw Write Text Export Print Send LA Help

Prism8

Q Search

ANOVA results Multiple comparisons

Data Tables

Info

Results

Graphs

Family

ANOVA results

Multiple comparisons

| Ordinary one-way ANOVA            |                                  |            |                    |              |             |                  |    |         |    |
|-----------------------------------|----------------------------------|------------|--------------------|--------------|-------------|------------------|----|---------|----|
| Multiple comparisons              |                                  |            |                    |              |             |                  |    |         |    |
| 1                                 | Number of families               | 1          |                    |              |             |                  |    |         |    |
| 2                                 | Number of comparisons per family | 2          |                    |              |             |                  |    |         |    |
| 3                                 | Alpha                            | 0.05       |                    |              |             |                  |    |         |    |
| 4                                 |                                  |            |                    |              |             |                  |    |         |    |
| Sidak's multiple comparisons test |                                  | Mean Diff. | 95.00% CI of diff. | Significant? | Summary     | Adjusted P Value |    |         |    |
| 6                                 | iRBCL vs. IFN $\gamma$ +iRBCL    | -4.172     | -518.6 to 510.3    | No           | ns          | 0.9997 A-B       |    |         |    |
| 7                                 | LPS vs. IFN $\gamma$ +LPS        | -147.8     | -662.2 to 366.7    | No           | ns          | 0.7013 C-D       |    |         |    |
| 8                                 |                                  |            |                    |              |             |                  |    |         |    |
| Test details                      |                                  | Mean 1     | Mean 2             | Mean Diff.   | SE of diff. | n1               | n2 | t       | DF |
| 10                                | iRBCL vs. IFN $\gamma$ +iRBCL    | 3.563      | 7.735              | -4.172       | 187.5       | 3                | 3  | 0.02225 | 8  |
| 11                                | LPS vs. IFN $\gamma$ +LPS        | 726.9      | 874.7              | -147.8       | 187.5       | 3                | 3  | 0.7879  | 8  |
| 12                                |                                  |            |                    |              |             |                  |    |         |    |
| 13                                |                                  |            |                    |              |             |                  |    |         |    |
| 14                                |                                  |            |                    |              |             |                  |    |         |    |
| 15                                |                                  |            |                    |              |             |                  |    |         |    |
| 16                                |                                  |            |                    |              |             |                  |    |         |    |
| 17                                |                                  |            |                    |              |             |                  |    |         |    |
| 18                                |                                  |            |                    |              |             |                  |    |         |    |
| 19                                |                                  |            |                    |              |             |                  |    |         |    |
| 20                                |                                  |            |                    |              |             |                  |    |         |    |
| 21                                |                                  |            |                    |              |             |                  |    |         |    |
| 22                                |                                  |            |                    |              |             |                  |    |         |    |
| 23                                |                                  |            |                    |              |             |                  |    |         |    |
| 24                                |                                  |            |                    |              |             |                  |    |         |    |
| 25                                |                                  |            |                    |              |             |                  |    |         |    |
| 26                                |                                  |            |                    |              |             |                  |    |         |    |
| 27                                |                                  |            |                    |              |             |                  |    |         |    |
| 28                                |                                  |            |                    |              |             |                  |    |         |    |

Ordinary one-way ANOVA of Transpose of TNF Row 1, Column A



**Control**

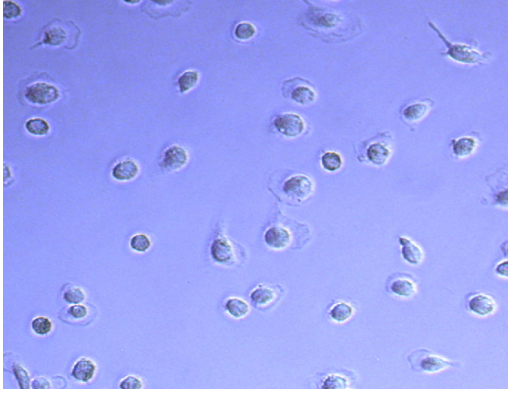

**RBC**

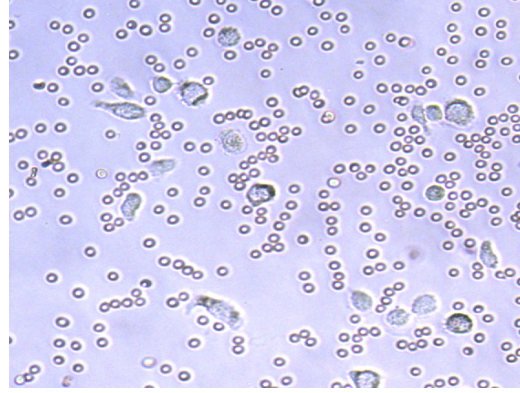

**iRBC**

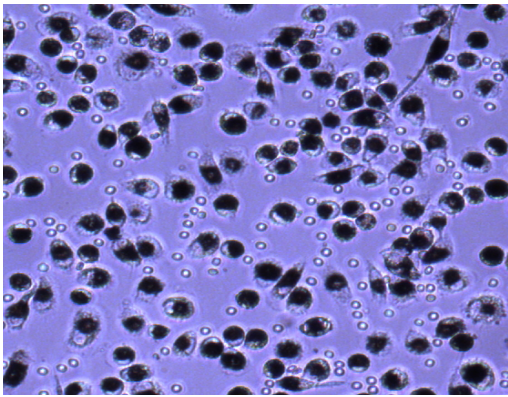

**LPS**

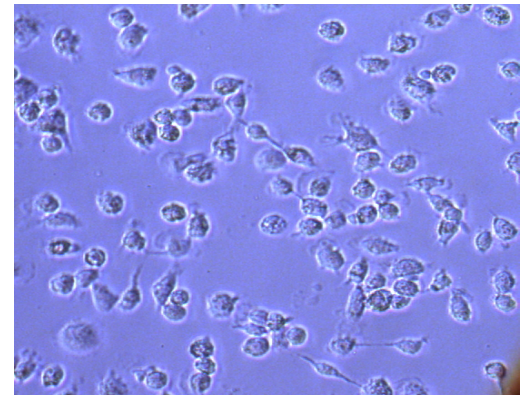

SourceDataforFigure1E

File Sheet Undo Clipboard Analysis Change Import Draw Write Text Export Print Send LA Help

Prism 8

Q Search

▼ Data Tables >>

- IL1beta
- IL6
- IL10
- TNF
- New Data Table...

▼ Info >>

- Project info 1
- Project info 1
- New Info...

▼ Results >>

- Transpose of IL1beta
- Paired t test of Transpose of IL1beta
- Transpose of IL6
- Paired t test of Transpose of IL6
- Transpose of IL10
- Paired t test of Transpose of IL10

Family >>

- IL1beta
  - Transpose
    - Paired t test
  - IL1beta

| Table format: |           | Group A    | Group B   | Group C      | Group D | Group E | Group F | Group G | Group H | Group I | Group J |
|---------------|-----------|------------|-----------|--------------|---------|---------|---------|---------|---------|---------|---------|
| Grouped       |           | Donor 1    | Donor 2   | Donor 3      | Title   | Title   | Title   | Title   | Title   | Title   | Title   |
|               |           | Y          | Y         | Y            | Y       | Y       | Y       | Y       | Y       | Y       | Y       |
| 1             | IRBCL     | 1.000000   | 1.000000  | 0.941964286  |         |         |         |         |         |         |         |
| 2             | IRBCL+LPS | 158.630000 | 24.950000 | 24.308056870 |         |         |         |         |         |         |         |
| 3             | Title     |            |           |              |         |         |         |         |         |         |         |
| 4             | Title     |            |           |              |         |         |         |         |         |         |         |
| 5             | Title     |            |           |              |         |         |         |         |         |         |         |
| 6             | Title     |            |           |              |         |         |         |         |         |         |         |
| 7             | Title     |            |           |              |         |         |         |         |         |         |         |
| 8             | Title     |            |           |              |         |         |         |         |         |         |         |
| 9             | Title     |            |           |              |         |         |         |         |         |         |         |
| 10            | Title     |            |           |              |         |         |         |         |         |         |         |
| 11            | Title     |            |           |              |         |         |         |         |         |         |         |
| 12            | Title     |            |           |              |         |         |         |         |         |         |         |
| 13            | Title     |            |           |              |         |         |         |         |         |         |         |
| 14            | Title     |            |           |              |         |         |         |         |         |         |         |
| 15            | Title     |            |           |              |         |         |         |         |         |         |         |
| 16            | Title     |            |           |              |         |         |         |         |         |         |         |
| 17            | Title     |            |           |              |         |         |         |         |         |         |         |
| 18            | Title     |            |           |              |         |         |         |         |         |         |         |
| 19            | Title     |            |           |              |         |         |         |         |         |         |         |
| 20            | Title     |            |           |              |         |         |         |         |         |         |         |
| 21            | Title     |            |           |              |         |         |         |         |         |         |         |
| 22            | Title     |            |           |              |         |         |         |         |         |         |         |
| 23            | Title     |            |           |              |         |         |         |         |         |         |         |
| 24            | Title     |            |           |              |         |         |         |         |         |         |         |
| 25            | Title     |            |           |              |         |         |         |         |         |         |         |

IL1beta

Row 2, Column RT, Selected: Rows 2, Columns 4

SourceDataforFigure1E

File Sheet Undo Clipboard Analysis Change Import Draw Write Text Export Print Send LA Help

Prism 8

Q Search

▼ Data Tables >>

- IL1beta
- IL6**
- IL10
- TNF
- + New Data Table...

▼ Info >>

- Project info 1
- Project info 1
- + New Info...

▼ Results >>

- Transpose of IL1beta
- Paired t test of Transpose of IL1beta
- Transpose of IL6**
- Paired t test of Transpose of IL6
- Transpose of IL10
- Paired t test of Transpose of IL10

Family >>

- IL6**
  - Transpose
    - Paired t test
  - IL6

| Table format: |           | Group A     | Group B      | Group C      | Group D | Group E | Group F | Group G | Group H | Group I | Group J | Group K |
|---------------|-----------|-------------|--------------|--------------|---------|---------|---------|---------|---------|---------|---------|---------|
| Grouped       |           | Donor 1     | Donor 2      | Donor 3      | Title   | Title   | Title   | Title   | Title   | Title   | Title   | Title   |
|               |           | Y           | Y            | Y            | Y       | Y       | Y       | Y       | Y       | Y       | Y       | Y       |
| 1             | iRBCL     | 4.550000    | 9.890000     | 0.591439689  |         |         |         |         |         |         |         |         |
| 2             | iRBCL+LPS | 8598.150000 | 16785.590000 | 804.11842110 |         |         |         |         |         |         |         |         |
| 3             | Title     |             |              |              |         |         |         |         |         |         |         |         |
| 4             | Title     |             |              |              |         |         |         |         |         |         |         |         |
| 5             | Title     |             |              |              |         |         |         |         |         |         |         |         |
| 6             | Title     |             |              |              |         |         |         |         |         |         |         |         |
| 7             | Title     |             |              |              |         |         |         |         |         |         |         |         |
| 8             | Title     |             |              |              |         |         |         |         |         |         |         |         |
| 9             | Title     |             |              |              |         |         |         |         |         |         |         |         |
| 10            | Title     |             |              |              |         |         |         |         |         |         |         |         |
| 11            | Title     |             |              |              |         |         |         |         |         |         |         |         |
| 12            | Title     |             |              |              |         |         |         |         |         |         |         |         |
| 13            | Title     |             |              |              |         |         |         |         |         |         |         |         |
| 14            | Title     |             |              |              |         |         |         |         |         |         |         |         |
| 15            | Title     |             |              |              |         |         |         |         |         |         |         |         |
| 16            | Title     |             |              |              |         |         |         |         |         |         |         |         |
| 17            | Title     |             |              |              |         |         |         |         |         |         |         |         |
| 18            | Title     |             |              |              |         |         |         |         |         |         |         |         |
| 19            | Title     |             |              |              |         |         |         |         |         |         |         |         |
| 20            | Title     |             |              |              |         |         |         |         |         |         |         |         |
| 21            | Title     |             |              |              |         |         |         |         |         |         |         |         |
| 22            | Title     |             |              |              |         |         |         |         |         |         |         |         |
| 23            | Title     |             |              |              |         |         |         |         |         |         |         |         |
| 24            | Title     |             |              |              |         |         |         |         |         |         |         |         |
| 25            | Title     |             |              |              |         |         |         |         |         |         |         |         |

IL6

Row 2, Column RT, Selected: Rows 2, Columns 4

SourceDataforFigure1E

File Sheet Undo Clipboard Analysis Change Import Draw Write Text Export Print Send LA Help

Prism 8

Q Search

▼ Data Tables >>

- IL1beta
- IL6
- IL10**
- TNF
- + New Data Table...

▼ Info >>

- Project info 1
- Project info 1
- + New Info...

▼ Results >>

- Transpose of IL1beta
- Paired t test of Transpose of IL1beta
- Transpose of IL6
- Paired t test of Transpose of IL6
- Transpose of IL10**
- Paired t test of Transpose of IL10**

Family >>

- IL10**
  - Transpose
    - Paired t test
  - IL10

| Table format: |           | Group A   | Group B   | Group C    | Group D | Group E | Group F | Group G | Group H | Group I | Group J | Group K |
|---------------|-----------|-----------|-----------|------------|---------|---------|---------|---------|---------|---------|---------|---------|
| Grouped       |           | Donor 1   | Donor 2   | Donor 3    | Title   | Title   | Title   | Title   | Title   | Title   | Title   | Title   |
|               |           | Y         | Y         | Y          | Y       | Y       | Y       | Y       | Y       | Y       | Y       | Y       |
| 1             | iRBCL     | 3.170000  | 2.140000  | 2.18000000 |         |         |         |         |         |         |         |         |
| 2             | iRBCL+LPS | 72.060000 | 53.180000 | 2.14678899 |         |         |         |         |         |         |         |         |
| 3             | Title     |           |           |            |         |         |         |         |         |         |         |         |
| 4             | Title     |           |           |            |         |         |         |         |         |         |         |         |
| 5             | Title     |           |           |            |         |         |         |         |         |         |         |         |
| 6             | Title     |           |           |            |         |         |         |         |         |         |         |         |
| 7             | Title     |           |           |            |         |         |         |         |         |         |         |         |
| 8             | Title     |           |           |            |         |         |         |         |         |         |         |         |
| 9             | Title     |           |           |            |         |         |         |         |         |         |         |         |
| 10            | Title     |           |           |            |         |         |         |         |         |         |         |         |
| 11            | Title     |           |           |            |         |         |         |         |         |         |         |         |
| 12            | Title     |           |           |            |         |         |         |         |         |         |         |         |
| 13            | Title     |           |           |            |         |         |         |         |         |         |         |         |
| 14            | Title     |           |           |            |         |         |         |         |         |         |         |         |
| 15            | Title     |           |           |            |         |         |         |         |         |         |         |         |
| 16            | Title     |           |           |            |         |         |         |         |         |         |         |         |
| 17            | Title     |           |           |            |         |         |         |         |         |         |         |         |
| 18            | Title     |           |           |            |         |         |         |         |         |         |         |         |
| 19            | Title     |           |           |            |         |         |         |         |         |         |         |         |
| 20            | Title     |           |           |            |         |         |         |         |         |         |         |         |
| 21            | Title     |           |           |            |         |         |         |         |         |         |         |         |
| 22            | Title     |           |           |            |         |         |         |         |         |         |         |         |
| 23            | Title     |           |           |            |         |         |         |         |         |         |         |         |
| 24            | Title     |           |           |            |         |         |         |         |         |         |         |         |
| 25            | Title     |           |           |            |         |         |         |         |         |         |         |         |

IL10

Row 2, Column RT, Selected: Rows 1, Columns 4

SourceDataforFigure1E

File Sheet Undo Clipboard Analysis Change Import Draw Write Text Export Print Send LA Help

Prism 8

Q Search

▼ Data Tables >>

- IL1beta
- IL6
- IL10
- TNF**
- + New Data Table...

▼ Info >>

- Project info 1
- Project info 1
- + New Info...

▼ Results >>

- Transpose of IL1beta
- Paired t test of Transpose of IL1beta
- Transpose of IL6
- Paired t test of Transpose of IL6
- Transpose of IL10
- Paired t test of Transpose of IL10

Family >>

- TNF**
  - Transpose
    - Paired t test
  - TNF

| Table format: |           | Group A     | Group B     | Group C    | Group D | Group E | Group F | Group G | Group H | Group I | Group J | Group K |
|---------------|-----------|-------------|-------------|------------|---------|---------|---------|---------|---------|---------|---------|---------|
| Grouped       |           | Donor 1     | Donor 2     | Donor 3    | Title   | Title   | Title   | Title   | Title   | Title   | Title   | Title   |
|               |           | Y           | Y           | Y          | Y       | Y       | Y       | Y       | Y       | Y       | Y       | Y       |
| 1             | iRBCL     | 19.920000   | 8.210000    | 0.76679841 |         |         |         |         |         |         |         |         |
| 2             | iRBCL+LPS | 6265.400000 | 7387.530000 | 142.417525 |         |         |         |         |         |         |         |         |
| 3             | Title     |             |             |            |         |         |         |         |         |         |         |         |
| 4             | Title     |             |             |            |         |         |         |         |         |         |         |         |
| 5             | Title     |             |             |            |         |         |         |         |         |         |         |         |
| 6             | Title     |             |             |            |         |         |         |         |         |         |         |         |
| 7             | Title     |             |             |            |         |         |         |         |         |         |         |         |
| 8             | Title     |             |             |            |         |         |         |         |         |         |         |         |
| 9             | Title     |             |             |            |         |         |         |         |         |         |         |         |
| 10            | Title     |             |             |            |         |         |         |         |         |         |         |         |
| 11            | Title     |             |             |            |         |         |         |         |         |         |         |         |
| 12            | Title     |             |             |            |         |         |         |         |         |         |         |         |
| 13            | Title     |             |             |            |         |         |         |         |         |         |         |         |
| 14            | Title     |             |             |            |         |         |         |         |         |         |         |         |
| 15            | Title     |             |             |            |         |         |         |         |         |         |         |         |
| 16            | Title     |             |             |            |         |         |         |         |         |         |         |         |
| 17            | Title     |             |             |            |         |         |         |         |         |         |         |         |
| 18            | Title     |             |             |            |         |         |         |         |         |         |         |         |
| 19            | Title     |             |             |            |         |         |         |         |         |         |         |         |
| 20            | Title     |             |             |            |         |         |         |         |         |         |         |         |
| 21            | Title     |             |             |            |         |         |         |         |         |         |         |         |
| 22            | Title     |             |             |            |         |         |         |         |         |         |         |         |
| 23            | Title     |             |             |            |         |         |         |         |         |         |         |         |
| 24            | Title     |             |             |            |         |         |         |         |         |         |         |         |
| 25            | Title     |             |             |            |         |         |         |         |         |         |         |         |

Row 2, Column RT, Selected: Rows 1, Columns 4

Q Search

▼ Data Tables >>

- IL1beta
- IL6
- IL10
- TNF
- + New Data Table...

▼ Info >>

- Project info 1
- Project info 1
- + New Info...

▼ Results >>

- Transpose of IL1beta
- Paired t test of Transpose of IL1beta**
- Transpose of IL6
- Paired t test of Transpose of IL6
- Transpose of IL10
- Paired t test of Transpose of IL10

Family >>

- IL1beta
- Transpose
- Paired t test**

| Paired t test |                                          |                 |  |  |  |  |  |  |  |
|---------------|------------------------------------------|-----------------|--|--|--|--|--|--|--|
| 9             | P value summary                          | ns              |  |  |  |  |  |  |  |
| 10            | Significantly different (P < 0.05)?      | No              |  |  |  |  |  |  |  |
| 11            | One- or two-tailed P value?              | Two-tailed      |  |  |  |  |  |  |  |
| 12            | t, df                                    | t=1.530, df=2   |  |  |  |  |  |  |  |
| 13            | Number of pairs                          | 3               |  |  |  |  |  |  |  |
| 14            |                                          |                 |  |  |  |  |  |  |  |
| 15            | <b>How big is the difference?</b>        |                 |  |  |  |  |  |  |  |
| 16            | Mean of differences (B - A)              | 68.32           |  |  |  |  |  |  |  |
| 17            | SD of differences                        | 77.35           |  |  |  |  |  |  |  |
| 18            | SEM of differences                       | 44.66           |  |  |  |  |  |  |  |
| 19            | 95% confidence interval                  | -123.8 to 260.5 |  |  |  |  |  |  |  |
| 20            | R squared (partial eta squared)          | 0.5392          |  |  |  |  |  |  |  |
| 21            |                                          |                 |  |  |  |  |  |  |  |
| 22            | <b>How effective was the pairing?</b>    |                 |  |  |  |  |  |  |  |
| 23            | Correlation coefficient (r)              | 0.5036          |  |  |  |  |  |  |  |
| 24            | P value (one tailed)                     | 0.3320          |  |  |  |  |  |  |  |
| 25            | P value summary                          | ns              |  |  |  |  |  |  |  |
| 26            | Was the pairing significantly effective? | No              |  |  |  |  |  |  |  |
| 27            |                                          |                 |  |  |  |  |  |  |  |
| 28            |                                          |                 |  |  |  |  |  |  |  |
| 29            |                                          |                 |  |  |  |  |  |  |  |
| 30            |                                          |                 |  |  |  |  |  |  |  |
| 31            |                                          |                 |  |  |  |  |  |  |  |
| 32            |                                          |                 |  |  |  |  |  |  |  |
| 33            |                                          |                 |  |  |  |  |  |  |  |

SourceDataforFigure1E

File Sheet Undo Clipboard Analysis Interpret Change Draw Write Text Export Print Send LA Help

12 Helvetica

Prism8

Search

Data Tables

- IL1beta
- IL6
- IL10
- TNF
- New Data Table...

Info

- Project info 1
- Project info 1
- New Info...

Results

- Transpose of IL1beta
- Paired t test of Transpose of IL1beta
- Transpose of IL6**
- Paired t test of Transpose of IL6
- Transpose of IL10
- Paired t test of Transpose of IL10

Family

- IL6
  - Transpose
  - Paired t test

|    | Transpose | A     | B         | C     | D     | E     | F     | G     | H     | I     | J     | K     | L     |
|----|-----------|-------|-----------|-------|-------|-------|-------|-------|-------|-------|-------|-------|-------|
|    |           | IRBCL | IRBCL+LPS | Title | Title | Title | Title | Title | Title | Title | Title | Title | Title |
|    |           | Y     | Y         | Y     | Y     | Y     | Y     | Y     | Y     | Y     | Y     | Y     | Y     |
| 1  | Donor 1   | 4.550 | 8598.150  |       |       |       |       |       |       |       |       |       |       |
| 2  | Donor 2   | 9.890 | 16785.590 |       |       |       |       |       |       |       |       |       |       |
| 3  | Donor 3   | 0.591 | 804.118   |       |       |       |       |       |       |       |       |       |       |
| 4  |           |       |           |       |       |       |       |       |       |       |       |       |       |
| 5  |           |       |           |       |       |       |       |       |       |       |       |       |       |
| 6  |           |       |           |       |       |       |       |       |       |       |       |       |       |
| 7  |           |       |           |       |       |       |       |       |       |       |       |       |       |
| 8  |           |       |           |       |       |       |       |       |       |       |       |       |       |
| 9  |           |       |           |       |       |       |       |       |       |       |       |       |       |
| 10 |           |       |           |       |       |       |       |       |       |       |       |       |       |
| 11 |           |       |           |       |       |       |       |       |       |       |       |       |       |
| 12 |           |       |           |       |       |       |       |       |       |       |       |       |       |
| 13 |           |       |           |       |       |       |       |       |       |       |       |       |       |
| 14 |           |       |           |       |       |       |       |       |       |       |       |       |       |
| 15 |           |       |           |       |       |       |       |       |       |       |       |       |       |
| 16 |           |       |           |       |       |       |       |       |       |       |       |       |       |
| 17 |           |       |           |       |       |       |       |       |       |       |       |       |       |
| 18 |           |       |           |       |       |       |       |       |       |       |       |       |       |
| 19 |           |       |           |       |       |       |       |       |       |       |       |       |       |
| 20 |           |       |           |       |       |       |       |       |       |       |       |       |       |
| 21 |           |       |           |       |       |       |       |       |       |       |       |       |       |
| 22 |           |       |           |       |       |       |       |       |       |       |       |       |       |
| 23 |           |       |           |       |       |       |       |       |       |       |       |       |       |
| 24 |           |       |           |       |       |       |       |       |       |       |       |       |       |
| 25 |           |       |           |       |       |       |       |       |       |       |       |       |       |
| 26 |           |       |           |       |       |       |       |       |       |       |       |       |       |

Transpose of IL6

Row 1, A: iRBCL

SourceDataforFigure1E

File Sheet Undo Clipboard Analysis Interpret Change Draw Write Text Export Print Send LA Help

Prism 8

Q Search

▼ Data Tables

- IL1beta
- IL6
- IL10
- TNF
- New Data Table...

▼ Info

- Project info 1
- Project info 1
- New Info...

▼ Results

- Transpose of IL1beta
- Paired t test of Transpose of IL1beta
- Transpose of IL6
- Paired t test of Transpose of IL6**
- Transpose of IL10
- Paired t test of Transpose of IL10

Family

- IL6
  - Transpose
  - Paired t test**

| Paired t test |                                          |                 |
|---------------|------------------------------------------|-----------------|
| 9             | P value summary                          | ns              |
| 10            | Significantly different (P < 0.05)?      | No              |
| 11            | One- or two-tailed P value?              | Two-tailed      |
| 12            | t, df                                    | t=1.892, df=2   |
| 13            | Number of pairs                          | 3               |
| 14            |                                          |                 |
| 15            | <b>How big is the difference?</b>        |                 |
| 16            | Mean of differences (B - A)              | 8724            |
| 17            | SD of differences                        | 7987            |
| 18            | SEM of differences                       | 4611            |
| 19            | 95% confidence interval                  | -11116 to 28565 |
| 20            | R squared (partial eta squared)          | 0.6415          |
| 21            |                                          |                 |
| 22            | <b>How effective was the pairing?</b>    |                 |
| 23            | Correlation coefficient (r)              | 0.9975          |
| 24            | P value (one tailed)                     | 0.0227          |
| 25            | P value summary                          | *               |
| 26            | Was the pairing significantly effective? | Yes             |
| 27            |                                          |                 |
| 28            |                                          |                 |
| 29            |                                          |                 |
| 30            |                                          |                 |
| 31            |                                          |                 |
| 32            |                                          |                 |
| 33            |                                          |                 |

Paired t test of Transpose of IL6 Row 1, Column A



SourceDataforFigure1E

File Sheet Undo Clipboard Analysis Interpret Change Draw Write Text Export Print Send LA Help

Prism 8

Search

Data Tables

- IL1beta
- IL6
- IL10**
- TNF
- New Data Table...

Info

- Project info 1
- Project info 1
- New Info...

Results

- Transpose of IL1beta
- Paired t test of Transpose of IL1beta
- Transpose of IL6
- Paired t test of Transpose of IL6
- Transpose of IL10**
- Paired t test of Transpose of IL10

Family

- IL10
  - Transpose
  - Paired t test

|    | Transpose | A     | B         | C     | D     | E     | F     | G     | H     | I     | J     | K     | L     |
|----|-----------|-------|-----------|-------|-------|-------|-------|-------|-------|-------|-------|-------|-------|
|    |           | IRBCL | IRBCL+LPS | Title | Title | Title | Title | Title | Title | Title | Title | Title | Title |
|    |           | Y     | Y         | Y     | Y     | Y     | Y     | Y     | Y     | Y     | Y     | Y     | Y     |
| 1  | Donor 1   | 3.170 | 72.060    |       |       |       |       |       |       |       |       |       |       |
| 2  | Donor 2   | 2.140 | 53.180    |       |       |       |       |       |       |       |       |       |       |
| 3  | Donor 3   | 2.180 | 2.147     |       |       |       |       |       |       |       |       |       |       |
| 4  |           |       |           |       |       |       |       |       |       |       |       |       |       |
| 5  |           |       |           |       |       |       |       |       |       |       |       |       |       |
| 6  |           |       |           |       |       |       |       |       |       |       |       |       |       |
| 7  |           |       |           |       |       |       |       |       |       |       |       |       |       |
| 8  |           |       |           |       |       |       |       |       |       |       |       |       |       |
| 9  |           |       |           |       |       |       |       |       |       |       |       |       |       |
| 10 |           |       |           |       |       |       |       |       |       |       |       |       |       |
| 11 |           |       |           |       |       |       |       |       |       |       |       |       |       |
| 12 |           |       |           |       |       |       |       |       |       |       |       |       |       |
| 13 |           |       |           |       |       |       |       |       |       |       |       |       |       |
| 14 |           |       |           |       |       |       |       |       |       |       |       |       |       |
| 15 |           |       |           |       |       |       |       |       |       |       |       |       |       |
| 16 |           |       |           |       |       |       |       |       |       |       |       |       |       |
| 17 |           |       |           |       |       |       |       |       |       |       |       |       |       |
| 18 |           |       |           |       |       |       |       |       |       |       |       |       |       |
| 19 |           |       |           |       |       |       |       |       |       |       |       |       |       |
| 20 |           |       |           |       |       |       |       |       |       |       |       |       |       |
| 21 |           |       |           |       |       |       |       |       |       |       |       |       |       |
| 22 |           |       |           |       |       |       |       |       |       |       |       |       |       |
| 23 |           |       |           |       |       |       |       |       |       |       |       |       |       |
| 24 |           |       |           |       |       |       |       |       |       |       |       |       |       |
| 25 |           |       |           |       |       |       |       |       |       |       |       |       |       |

Transpose of IL10

Row 1, A: iRBCL

SourceDataforFigure1E

File Sheet Undo Clipboard Analysis Interpret Change Draw Write Text Export Print Send LA Help

12 Helvetica

Prism 8

Q Search

▼ Info

- Project info 1
- Project info 1
- New Info...

▼ Results

- Transpose of IL1beta
- Paired t test of Transpose of IL1beta
- Transpose of IL6
- Paired t test of Transpose of IL6
- Transpose of IL10
- Paired t test of Transpose of IL10
- Transpose of TNF**
- Paired t test of Transpose of TNF
- New Analysis...

▼ Graphs

- IL1beta
- IL6

Family

- TNF
- Transpose
- Paired t test

|    | Transpose | A      | B         | C     | D     | E     | F     | G     | H     | I     | J     | K     |
|----|-----------|--------|-----------|-------|-------|-------|-------|-------|-------|-------|-------|-------|
|    |           | IRBCL  | IRBCL+LPS | Title | Title | Title | Title | Title | Title | Title | Title | Title |
|    |           | Y      | Y         | Y     | Y     | Y     | Y     | Y     | Y     | Y     | Y     | Y     |
| 1  | Donor 1   | 19.920 | 6265.400  |       |       |       |       |       |       |       |       |       |
| 2  | Donor 2   | 8.210  | 7387.530  |       |       |       |       |       |       |       |       |       |
| 3  | Donor 3   | 0.767  | 142.418   |       |       |       |       |       |       |       |       |       |
| 4  |           |        |           |       |       |       |       |       |       |       |       |       |
| 5  |           |        |           |       |       |       |       |       |       |       |       |       |
| 6  |           |        |           |       |       |       |       |       |       |       |       |       |
| 7  |           |        |           |       |       |       |       |       |       |       |       |       |
| 8  |           |        |           |       |       |       |       |       |       |       |       |       |
| 9  |           |        |           |       |       |       |       |       |       |       |       |       |
| 10 |           |        |           |       |       |       |       |       |       |       |       |       |
| 11 |           |        |           |       |       |       |       |       |       |       |       |       |
| 12 |           |        |           |       |       |       |       |       |       |       |       |       |
| 13 |           |        |           |       |       |       |       |       |       |       |       |       |
| 14 |           |        |           |       |       |       |       |       |       |       |       |       |
| 15 |           |        |           |       |       |       |       |       |       |       |       |       |
| 16 |           |        |           |       |       |       |       |       |       |       |       |       |
| 17 |           |        |           |       |       |       |       |       |       |       |       |       |
| 18 |           |        |           |       |       |       |       |       |       |       |       |       |
| 19 |           |        |           |       |       |       |       |       |       |       |       |       |
| 20 |           |        |           |       |       |       |       |       |       |       |       |       |
| 21 |           |        |           |       |       |       |       |       |       |       |       |       |
| 22 |           |        |           |       |       |       |       |       |       |       |       |       |
| 23 |           |        |           |       |       |       |       |       |       |       |       |       |
| 24 |           |        |           |       |       |       |       |       |       |       |       |       |
| 25 |           |        |           |       |       |       |       |       |       |       |       |       |

Transpose of TNF

Row 1, A: IRBCL

SourceDataforFigure1E

File Sheet Undo Clipboard Analysis Interpret Change Draw Write Text Export Print Send LA Help

12 Helvetica

Prism8

Search

Data Tables

- IL1beta
- IL6
- IL10
- TNF
- New Data Table...

Info

- Project info 1
- Project info 1
- New Info...

Results

- Transpose of IL1beta
- Paired t test of Transpose of IL1beta
- Transpose of IL6
- Paired t test of Transpose of IL6
- Transpose of IL10
- Paired t test of Transpose of IL10

Family

- IL1beta
- Transpose
- Paired t test

|    | Transpose | A     | B         | C     | D     | E     | F     | G     | H     | I     | J     | K     | L     |
|----|-----------|-------|-----------|-------|-------|-------|-------|-------|-------|-------|-------|-------|-------|
|    |           | IRBCL | IRBCL+LPS | Title | Title | Title | Title | Title | Title | Title | Title | Title | Title |
|    |           | Y     | Y         | Y     | Y     | Y     | Y     | Y     | Y     | Y     | Y     | Y     | Y     |
| 1  | Donor 1   | 1.000 | 158.630   |       |       |       |       |       |       |       |       |       |       |
| 2  | Donor 2   | 1.000 | 24.950    |       |       |       |       |       |       |       |       |       |       |
| 3  | Donor 3   | 0.942 | 24.308    |       |       |       |       |       |       |       |       |       |       |
| 4  |           |       |           |       |       |       |       |       |       |       |       |       |       |
| 5  |           |       |           |       |       |       |       |       |       |       |       |       |       |
| 6  |           |       |           |       |       |       |       |       |       |       |       |       |       |
| 7  |           |       |           |       |       |       |       |       |       |       |       |       |       |
| 8  |           |       |           |       |       |       |       |       |       |       |       |       |       |
| 9  |           |       |           |       |       |       |       |       |       |       |       |       |       |
| 10 |           |       |           |       |       |       |       |       |       |       |       |       |       |
| 11 |           |       |           |       |       |       |       |       |       |       |       |       |       |
| 12 |           |       |           |       |       |       |       |       |       |       |       |       |       |
| 13 |           |       |           |       |       |       |       |       |       |       |       |       |       |
| 14 |           |       |           |       |       |       |       |       |       |       |       |       |       |
| 15 |           |       |           |       |       |       |       |       |       |       |       |       |       |
| 16 |           |       |           |       |       |       |       |       |       |       |       |       |       |
| 17 |           |       |           |       |       |       |       |       |       |       |       |       |       |
| 18 |           |       |           |       |       |       |       |       |       |       |       |       |       |
| 19 |           |       |           |       |       |       |       |       |       |       |       |       |       |
| 20 |           |       |           |       |       |       |       |       |       |       |       |       |       |
| 21 |           |       |           |       |       |       |       |       |       |       |       |       |       |
| 22 |           |       |           |       |       |       |       |       |       |       |       |       |       |
| 23 |           |       |           |       |       |       |       |       |       |       |       |       |       |
| 24 |           |       |           |       |       |       |       |       |       |       |       |       |       |
| 25 |           |       |           |       |       |       |       |       |       |       |       |       |       |

Transpose of IL1beta

Row 1, A: IRBCL

SourceDataforFigure1E

File Sheet Undo Clipboard Analysis Interpret Change Draw Write Text Export Print Send LA Help

Q Search

▼ Info

- Project info 1
- Project info 1
- New Info...

▼ Results

- Transpose of IL1beta
- Paired t test of Transpose of IL1beta
- Transpose of IL6
- Paired t test of Transpose of IL6
- Transpose of IL10
- Paired t test of Transpose of IL10
- Transpose of TNF
- Paired t test of Transpose of TNF**
- New Analysis...

▼ Graphs

- IL1beta
- IL6

Family

- TNF
- Transpose
- Paired t test**

| Paired t test |                                       |
|---------------|---------------------------------------|
| 1             | Table Analyzed                        |
| 2             |                                       |
| 3             | Column B                              |
| 4             | vs.                                   |
| 5             | Column A                              |
| 6             |                                       |
| 7             | <b>Paired t test</b>                  |
| 8             | P value                               |
| 9             | P value summary                       |
| 10            | Significantly different (P < 0.05)?   |
| 11            | One- or two-tailed P value?           |
| 12            | t, df                                 |
| 13            | Number of pairs                       |
| 14            |                                       |
| 15            | <b>How big is the difference?</b>     |
| 16            | Mean of differences (B - A)           |
| 17            | SD of differences                     |
| 18            | SEM of differences                    |
| 19            | 95% confidence interval               |
| 20            | R squared (partial eta squared)       |
| 21            |                                       |
| 22            | <b>How effective was the pairing?</b> |
| 23            | Correlation coefficient (r)           |
| 24            | P value (one tailed)                  |
| 25            | P value summary                       |

Prism 8

Paired t test of Transpose of TNF Row 1, Column A

| Paired t test |                                          |                 |  |  |  |  |  |  |  |  |  |  |  |  |  |  |  |  |  |  |
|---------------|------------------------------------------|-----------------|--|--|--|--|--|--|--|--|--|--|--|--|--|--|--|--|--|--|
| 8             | P value                                  | 0.1926          |  |  |  |  |  |  |  |  |  |  |  |  |  |  |  |  |  |  |
| 9             | P value summary                          | ns              |  |  |  |  |  |  |  |  |  |  |  |  |  |  |  |  |  |  |
| 10            | Significantly different (P < 0.05)?      | No              |  |  |  |  |  |  |  |  |  |  |  |  |  |  |  |  |  |  |
| 11            | One- or two-tailed P value?              | Two-tailed      |  |  |  |  |  |  |  |  |  |  |  |  |  |  |  |  |  |  |
| 12            | t, df                                    | t=1.935, df=2   |  |  |  |  |  |  |  |  |  |  |  |  |  |  |  |  |  |  |
| 13            | Number of pairs                          | 3               |  |  |  |  |  |  |  |  |  |  |  |  |  |  |  |  |  |  |
| 14            |                                          |                 |  |  |  |  |  |  |  |  |  |  |  |  |  |  |  |  |  |  |
| 15            | <b>How big is the difference?</b>        |                 |  |  |  |  |  |  |  |  |  |  |  |  |  |  |  |  |  |  |
| 16            | Mean of differences (B - A)              | 39.97           |  |  |  |  |  |  |  |  |  |  |  |  |  |  |  |  |  |  |
| 17            | SD of differences                        | 35.77           |  |  |  |  |  |  |  |  |  |  |  |  |  |  |  |  |  |  |
| 18            | SEM of differences                       | 20.65           |  |  |  |  |  |  |  |  |  |  |  |  |  |  |  |  |  |  |
| 19            | 95% confidence interval                  | -48.90 to 128.8 |  |  |  |  |  |  |  |  |  |  |  |  |  |  |  |  |  |  |
| 20            | R squared (partial eta squared)          | 0.6519          |  |  |  |  |  |  |  |  |  |  |  |  |  |  |  |  |  |  |
| 21            |                                          |                 |  |  |  |  |  |  |  |  |  |  |  |  |  |  |  |  |  |  |
| 22            | <b>How effective was the pairing?</b>    |                 |  |  |  |  |  |  |  |  |  |  |  |  |  |  |  |  |  |  |
| 23            | Correlation coefficient (r)              | 0.6841          |  |  |  |  |  |  |  |  |  |  |  |  |  |  |  |  |  |  |
| 24            | P value (one tailed)                     | 0.2602          |  |  |  |  |  |  |  |  |  |  |  |  |  |  |  |  |  |  |
| 25            | P value summary                          | ns              |  |  |  |  |  |  |  |  |  |  |  |  |  |  |  |  |  |  |
| 26            | Was the pairing significantly effective? | No              |  |  |  |  |  |  |  |  |  |  |  |  |  |  |  |  |  |  |
| 27            |                                          |                 |  |  |  |  |  |  |  |  |  |  |  |  |  |  |  |  |  |  |
| 28            |                                          |                 |  |  |  |  |  |  |  |  |  |  |  |  |  |  |  |  |  |  |
| 29            |                                          |                 |  |  |  |  |  |  |  |  |  |  |  |  |  |  |  |  |  |  |
| 30            |                                          |                 |  |  |  |  |  |  |  |  |  |  |  |  |  |  |  |  |  |  |
| 31            |                                          |                 |  |  |  |  |  |  |  |  |  |  |  |  |  |  |  |  |  |  |
| 32            |                                          |                 |  |  |  |  |  |  |  |  |  |  |  |  |  |  |  |  |  |  |
