# Supplementary material for: Malaria inflammation by xanthine oxidase‐produced reactive oxygen species
Source: PubMed Central journal article supplement (PMC6685105; doi:10.15252/emmm.201809903), 2019-07-02
Supplement: EMMM-11-e9903-s003.pdf [file EMMM-11-e9903-s003.pdf]

SourceDataforFigure2A — Edited

File Sheet Undo Clipboard Analysis Change Import Draw Write Text Export Print Send LA Help

Prism 8

Search

Table format: Grouped

|    |         | Group A    | Group B   | Group C    | Group D    | Group E    | Group F | Group G | Group H | Group I | Group J | Group K |
|----|---------|------------|-----------|------------|------------|------------|---------|---------|---------|---------|---------|---------|
|    |         | Donor 1    | Donor 2   | Donor 3    | Donor 4    | Donor 5    | Donor 6 | Donor 7 | Title   | Title   | Title   | Title   |
|    |         | Y          | Y         | Y          | Y          | Y          | Y       | Y       | Y       |         |         |         |
| 1  | Control | 1.000000   | 1.000000  | 1.000000   | 1.000000   | 1.000000   | 1.00    | 1.00    |         |         |         |         |
| 2  | RBCL    | 0.961616   | 2.032318  | 0.651576   | 1.829546   | 3.805310   | 1.00    | 2.99    |         |         |         |         |
| 3  | IRBCL   | 6.992323   | 2.445283  | 3.468068   | 6.301137   | 3.094395   | 10.43   | 10.30   |         |         |         |         |
| 4  | XO      | 80.839120  | 14.491010 | 69.353270  | 255.875000 | 337.876100 | 222.94  | 264.93  |         |         |         |         |
| 5  | LPS     | 308.201300 | 55.278760 | 789.660500 | 910.409100 | 888.811200 | 667.56  | 1372.37 |         |         |         |         |
| 6  | Title   |            |           |            |            |            |         |         |         |         |         |         |
| 7  | Title   |            |           |            |            |            |         |         |         |         |         |         |
| 8  | Title   |            |           |            |            |            |         |         |         |         |         |         |
| 9  | Title   |            |           |            |            |            |         |         |         |         |         |         |
| 10 | Title   |            |           |            |            |            |         |         |         |         |         |         |
| 11 | Title   |            |           |            |            |            |         |         |         |         |         |         |
| 12 | Title   |            |           |            |            |            |         |         |         |         |         |         |
| 13 | Title   |            |           |            |            |            |         |         |         |         |         |         |
| 14 | Title   |            |           |            |            |            |         |         |         |         |         |         |
| 15 | Title   |            |           |            |            |            |         |         |         |         |         |         |
| 16 | Title   |            |           |            |            |            |         |         |         |         |         |         |
| 17 | Title   |            |           |            |            |            |         |         |         |         |         |         |
| 18 | Title   |            |           |            |            |            |         |         |         |         |         |         |
| 19 | Title   |            |           |            |            |            |         |         |         |         |         |         |
| 20 | Title   |            |           |            |            |            |         |         |         |         |         |         |
| 21 | Title   |            |           |            |            |            |         |         |         |         |         |         |
| 22 | Title   |            |           |            |            |            |         |         |         |         |         |         |
| 23 | Title   |            |           |            |            |            |         |         |         |         |         |         |
| 24 | Title   |            |           |            |            |            |         |         |         |         |         |         |
| 25 | Title   |            |           |            |            |            |         |         |         |         |         |         |
| 26 | Title   |            |           |            |            |            |         |         |         |         |         |         |

▼ Data Tables

- TNF
- IL-6
- IL-10
- IL-1beta
- New Data Table...

▼ Info

- Project info 1
- Project info 1
- New Info...

▼ Results

- Transpose of TNF
- Transform of TNF
- RM one-way ANOVA of Transform of TNF
- Transpose of IL-6
- Transform of IL-6
- RM one-way ANOVA of Transform of IL-6
- Transpose of IL-10

Family

- TNF
  - Transpose
    - Transform of TNF
      - RM one-way ANOVA

TNF

Row 9, F: Donor 6

SourceDataforFigure2A — Edited

File Sheet Undo Clipboard Analysis Change Import Draw Write Text Export Print Send LA Help

Prism8

Search

Table format: Grouped

|    |         | Group A    | Group B    | Group C     | Group D | Group E  | Group F | Group G | Group H | Group I | Group J | Group K |
|----|---------|------------|------------|-------------|---------|----------|---------|---------|---------|---------|---------|---------|
|    |         | Donor 1    | Donor 2    | Donor 3     | Donor 4 | Donor 5  | Donor 6 | Donor 7 | Title   | Title   | Title   | Title   |
|    |         | Y          | Y          | Y           | Y       | Y        | Y       | Y       | Y       | Y       | Y       | Y       |
| 1  | Control | 1.000000   | 1.000000   | 1.000000    | 1.00    | 1.00     | 1.00    | 1.00    |         |         |         |         |
| 2  | RBCL    | 0.698930   | 5.314219   | 0.833887    | 2.36    | 19.45    | 1.00    | 1.00    |         |         |         |         |
| 3  | IRBCL   | 0.959051   | 5.442364   | 0.963455    | 2.96    | 12.28    | 6.64    | 9.38    |         |         |         |         |
| 4  | XO      | 58.953000  | 287.262700 | 60.880400   | 1312.52 | 3176.95  | 1051.82 | 899.22  |         |         |         |         |
| 5  | LPS     | 813.036700 | 991.386800 | 2328.126000 | 5126.32 | 10896.21 | 3265.93 | 5290.13 |         |         |         |         |
| 6  | Title   |            |            |             |         |          |         |         |         |         |         |         |
| 7  | Title   |            |            |             |         |          |         |         |         |         |         |         |
| 8  | Title   |            |            |             |         |          |         |         |         |         |         |         |
| 9  | Title   |            |            |             |         |          |         |         |         |         |         |         |
| 10 | Title   |            |            |             |         |          |         |         |         |         |         |         |
| 11 | Title   |            |            |             |         |          |         |         |         |         |         |         |
| 12 | Title   |            |            |             |         |          |         |         |         |         |         |         |
| 13 | Title   |            |            |             |         |          |         |         |         |         |         |         |
| 14 | Title   |            |            |             |         |          |         |         |         |         |         |         |
| 15 | Title   |            |            |             |         |          |         |         |         |         |         |         |
| 16 | Title   |            |            |             |         |          |         |         |         |         |         |         |
| 17 | Title   |            |            |             |         |          |         |         |         |         |         |         |
| 18 | Title   |            |            |             |         |          |         |         |         |         |         |         |
| 19 | Title   |            |            |             |         |          |         |         |         |         |         |         |
| 20 | Title   |            |            |             |         |          |         |         |         |         |         |         |
| 21 | Title   |            |            |             |         |          |         |         |         |         |         |         |
| 22 | Title   |            |            |             |         |          |         |         |         |         |         |         |
| 23 | Title   |            |            |             |         |          |         |         |         |         |         |         |
| 24 | Title   |            |            |             |         |          |         |         |         |         |         |         |
| 25 | Title   |            |            |             |         |          |         |         |         |         |         |         |
| 26 | Title   |            |            |             |         |          |         |         |         |         |         |         |

▼ Data Tables

- TNF
- IL-6**
- IL-10
- IL-1beta
- New Data Table...

▼ Info

- Project info 1
- Project info 1
- New Info...

▼ Results

- Transpose of TNF
- Transform of TNF
- RM one-way ANOVA of Transform of TNF
- Transpose of IL-6**
- Transform of IL-6**
- RM one-way ANOVA of Transform of IL-6**
- Transpose of IL-10

Family

- IL-6**
  - Transpose
  - Transform of IL-6
  - RM one-way ANOVA
- IL-6

IL-6

Row 1, Column RT

SourceDataforFigure2A — Edited

File Sheet Undo Clipboard Analysis Change Import Draw Write Text Export Print Send LA Help

Prism8

Search

Table format: Grouped

|    |         | Group A   | Group B    | Group C   | Group D | Group E | Group F | Group G | Group H | Group I | Group J | Group K | Group L |
|----|---------|-----------|------------|-----------|---------|---------|---------|---------|---------|---------|---------|---------|---------|
|    |         | Donor 1   | Donor 2    | Donor 3   | Donor 4 | Donor 5 | Donor 6 | Donor 7 | Title   | Title   | Title   | Title   |         |
|    |         | Y         | Y          | Y         | Y       | Y       | Y       | Y       | Y       | Y       | Y       | Y       |         |
| 1  | Control | 1.000000  | 1.000000   | 1.000000  | 1.00    | 1.00    | 1.00    | 1.00    |         |         |         |         |         |
| 2  | RBCL    | 0.821862  | 2.070681   | 1.727273  | 1.00    | 2.51    | 1.00    | 1.00    |         |         |         |         |         |
| 3  | IRBCL   | 3.082996  | 2.717278   | 1.409091  | 1.00    | 2.41    | 1.00    | 2.08    |         |         |         |         |         |
| 4  | XO      | 13.963560 | 5.479058   | 3.954546  | 5.76    | 18.80   | 4.55    | 6.15    |         |         |         |         |         |
| 5  | LPS     | 35.054660 | 103.672800 | 80.272730 | 33.74   | 35.26   | 4.92    | 13.71   |         |         |         |         |         |
| 6  | Title   |           |            |           |         |         |         |         |         |         |         |         |         |
| 7  | Title   |           |            |           |         |         |         |         |         |         |         |         |         |
| 8  | Title   |           |            |           |         |         |         |         |         |         |         |         |         |
| 9  | Title   |           |            |           |         |         |         |         |         |         |         |         |         |
| 10 | Title   |           |            |           |         |         |         |         |         |         |         |         |         |
| 11 | Title   |           |            |           |         |         |         |         |         |         |         |         |         |
| 12 | Title   |           |            |           |         |         |         |         |         |         |         |         |         |
| 13 | Title   |           |            |           |         |         |         |         |         |         |         |         |         |
| 14 | Title   |           |            |           |         |         |         |         |         |         |         |         |         |
| 15 | Title   |           |            |           |         |         |         |         |         |         |         |         |         |
| 16 | Title   |           |            |           |         |         |         |         |         |         |         |         |         |
| 17 | Title   |           |            |           |         |         |         |         |         |         |         |         |         |
| 18 | Title   |           |            |           |         |         |         |         |         |         |         |         |         |
| 19 | Title   |           |            |           |         |         |         |         |         |         |         |         |         |
| 20 | Title   |           |            |           |         |         |         |         |         |         |         |         |         |
| 21 | Title   |           |            |           |         |         |         |         |         |         |         |         |         |
| 22 | Title   |           |            |           |         |         |         |         |         |         |         |         |         |
| 23 | Title   |           |            |           |         |         |         |         |         |         |         |         |         |
| 24 | Title   |           |            |           |         |         |         |         |         |         |         |         |         |
| 25 | Title   |           |            |           |         |         |         |         |         |         |         |         |         |
| 26 | Title   |           |            |           |         |         |         |         |         |         |         |         |         |

▼ Data Tables

- TNF
- IL-6
- IL-10
- IL-1beta
- New Data Table...

▼ Info

- Project info 1
- Project info 1
- New Info...

▼ Results

- Transpose of TNF
- Transform of TNF
- RM one-way ANOVA of Transform of TNF
- Transpose of IL-6
- Transform of IL-6
- RM one-way ANOVA of Transform of IL-6
- Transpose of IL-10

Family

- IL-10
  - Transpose
  - Transform of IL-10
    - RM one-way ANOVA
- IL-10

IL-10

Row 1, Column RT

SourceDataforFigure2A — Edited

File Sheet Undo Clipboard Analysis Change Import Draw Write Text Export Print Send LA Help

Prism8

Search

Table format: Grouped

|    |         | Group A | Group B   | Group C  | Group D | Group E | Group F | Group G | Group H | Group I | Group J | Group K | Group L |
|----|---------|---------|-----------|----------|---------|---------|---------|---------|---------|---------|---------|---------|---------|
|    |         | Donor 1 | Donor 2   | Donor 3  | Donor 4 | Donor 5 | Donor 6 | Donor 7 | Title   | Title   | Title   | Title   | Title   |
|    |         | Y       | Y         | Y        | Y       | Y       | Y       | Y       | Y       | Y       | Y       | Y       | Y       |
| 1  | Control | 1.00    | 1.000000  | 1.000000 | 1.00    | 1.00    | 1.00    | 1.00    |         |         |         |         |         |
| 2  | RBCL    | 1.00    | 6.487088  | 1.000000 | 1.00    | 1.00    | 1.00    | 1.00    |         |         |         |         |         |
| 3  | IRBCL   | 1.00    | 3.740610  | 1.000000 | 1.00    | 1.00    | 1.00    | 1.00    |         |         |         |         |         |
| 4  | XO      | 38.45   | 7.575117  | 1.000000 | 29.88   | 20.48   | 19.94   | 6.03    |         |         |         |         |         |
| 5  | LPS     | 86.73   | 46.471830 | 9.880000 | 29.88   | 20.48   | 19.94   | 6.03    |         |         |         |         |         |
| 6  | Title   |         |           |          |         |         |         |         |         |         |         |         |         |
| 7  | Title   |         |           |          |         |         |         |         |         |         |         |         |         |
| 8  | Title   |         |           |          |         |         |         |         |         |         |         |         |         |
| 9  | Title   |         |           |          |         |         |         |         |         |         |         |         |         |
| 10 | Title   |         |           |          |         |         |         |         |         |         |         |         |         |
| 11 | Title   |         |           |          |         |         |         |         |         |         |         |         |         |
| 12 | Title   |         |           |          |         |         |         |         |         |         |         |         |         |
| 13 | Title   |         |           |          |         |         |         |         |         |         |         |         |         |
| 14 | Title   |         |           |          |         |         |         |         |         |         |         |         |         |
| 15 | Title   |         |           |          |         |         |         |         |         |         |         |         |         |
| 16 | Title   |         |           |          |         |         |         |         |         |         |         |         |         |
| 17 | Title   |         |           |          |         |         |         |         |         |         |         |         |         |
| 18 | Title   |         |           |          |         |         |         |         |         |         |         |         |         |
| 19 | Title   |         |           |          |         |         |         |         |         |         |         |         |         |
| 20 | Title   |         |           |          |         |         |         |         |         |         |         |         |         |
| 21 | Title   |         |           |          |         |         |         |         |         |         |         |         |         |
| 22 | Title   |         |           |          |         |         |         |         |         |         |         |         |         |
| 23 | Title   |         |           |          |         |         |         |         |         |         |         |         |         |
| 24 | Title   |         |           |          |         |         |         |         |         |         |         |         |         |
| 25 | Title   |         |           |          |         |         |         |         |         |         |         |         |         |
| 26 | Title   |         |           |          |         |         |         |         |         |         |         |         |         |

▼ Data Tables

- TNF
- IL-6
- IL-10
- IL-1beta**
- New Data Table...

▼ Info

- Project info 1
- Project info 1
- New Info...

▼ Results

- Transpose of TNF
- Transform of TNF
- RM one-way ANOVA of Transform of TNF
- Transpose of IL-6
- Transform of IL-6
- RM one-way ANOVA of Transform of IL-6
- Transpose of IL-10

Family

- IL-1beta**
  - Transpose
  - Transform of IL-1beta
  - RM one-way ANOVA
- IL-1beta

IL-1beta

Row 1, Column RT

SourceDataforFigure2A — Edited

File Sheet Undo Clipboard Analysis Interpret Change Draw Write Text Export Print Send LA Help

Prism 8

Search

▼ Data Tables

- TNF
- IL-6
- IL-10
- IL-1beta
- New Data Table...

▼ Info

- Project info 1
- Project info 1
- New Info...

▼ Results

- Transpose of TNF
- Transform of TNF
- RM one-way ANOVA of Transform of TNF
- Transpose of IL-6
- Transform of IL-6
- RM one-way ANOVA of Transform of IL-6
- Transpose of IL-10

Family

- TNF
- Transpose
- Transform of TNF
- RM one-way ANOVA

| Transpose |         | A       | B     | C      | D       | E        | F     | G     | H     | I     | J     | K     |
|-----------|---------|---------|-------|--------|---------|----------|-------|-------|-------|-------|-------|-------|
|           |         | Control | RBCL  | iRBCL  | XO      | LPS      | Title | Title | Title | Title | Title | Title |
|           |         | Y       | Y     | Y      | Y       | Y        | Y     | Y     | Y     | Y     | Y     | Y     |
| 1         | Donor 1 | 1.000   | 0.962 | 6.992  | 80.839  | 308.201  |       |       |       |       |       |       |
| 2         | Donor 2 | 1.000   | 2.032 | 2.445  | 14.491  | 55.279   |       |       |       |       |       |       |
| 3         | Donor 3 | 1.000   | 0.652 | 3.468  | 69.353  | 789.661  |       |       |       |       |       |       |
| 4         | Donor 4 | 1.000   | 1.830 | 6.301  | 255.875 | 910.409  |       |       |       |       |       |       |
| 5         | Donor 5 | 1.000   | 3.805 | 3.094  | 337.876 | 888.811  |       |       |       |       |       |       |
| 6         | Donor 6 | 1.000   | 1.000 | 10.430 | 222.940 | 667.560  |       |       |       |       |       |       |
| 7         | Donor 7 | 1.000   | 2.990 | 10.300 | 264.930 | 1372.370 |       |       |       |       |       |       |
| 8         |         |         |       |        |         |          |       |       |       |       |       |       |
| 9         |         |         |       |        |         |          |       |       |       |       |       |       |
| 10        |         |         |       |        |         |          |       |       |       |       |       |       |
| 11        |         |         |       |        |         |          |       |       |       |       |       |       |
| 12        |         |         |       |        |         |          |       |       |       |       |       |       |
| 13        |         |         |       |        |         |          |       |       |       |       |       |       |
| 14        |         |         |       |        |         |          |       |       |       |       |       |       |
| 15        |         |         |       |        |         |          |       |       |       |       |       |       |
| 16        |         |         |       |        |         |          |       |       |       |       |       |       |
| 17        |         |         |       |        |         |          |       |       |       |       |       |       |
| 18        |         |         |       |        |         |          |       |       |       |       |       |       |
| 19        |         |         |       |        |         |          |       |       |       |       |       |       |
| 20        |         |         |       |        |         |          |       |       |       |       |       |       |
| 21        |         |         |       |        |         |          |       |       |       |       |       |       |
| 22        |         |         |       |        |         |          |       |       |       |       |       |       |
| 23        |         |         |       |        |         |          |       |       |       |       |       |       |
| 24        |         |         |       |        |         |          |       |       |       |       |       |       |
| 25        |         |         |       |        |         |          |       |       |       |       |       |       |
| 26        |         |         |       |        |         |          |       |       |       |       |       |       |

Transpose of TNF

Row 5, B: RBCL

|    |         | A       | B      | C     | D     | E     | F     | G     | H     | I     | J     | K     |
|----|---------|---------|--------|-------|-------|-------|-------|-------|-------|-------|-------|-------|
|    |         | Control | RBCL   | iRBCL | XO    | LPS   | Title | Title | Title | Title | Title | Title |
|    |         | Y       | Y      | Y     | Y     | Y     | Y     | Y     | Y     | Y     | Y     | Y     |
| 1  | Donor 1 | 0.000   | -0.017 | 0.845 | 1.908 | 2.489 |       |       |       |       |       |       |
| 2  | Donor 2 | 0.000   | 0.308  | 0.388 | 1.161 | 1.743 |       |       |       |       |       |       |
| 3  | Donor 3 | 0.000   | -0.186 | 0.540 | 1.841 | 2.897 |       |       |       |       |       |       |
| 4  | Donor 4 | 0.000   | 0.262  | 0.799 | 2.408 | 2.959 |       |       |       |       |       |       |
| 5  | Donor 5 | 0.000   | 0.580  | 0.491 | 2.529 | 2.949 |       |       |       |       |       |       |
| 6  | Donor 6 | 0.000   | 0.000  | 1.018 | 2.348 | 2.824 |       |       |       |       |       |       |
| 7  | Donor 7 | 0.000   | 0.476  | 1.013 | 2.423 | 3.137 |       |       |       |       |       |       |
| 8  |         |         |        |       |       |       |       |       |       |       |       |       |
| 9  |         |         |        |       |       |       |       |       |       |       |       |       |
| 10 |         |         |        |       |       |       |       |       |       |       |       |       |
| 11 |         |         |        |       |       |       |       |       |       |       |       |       |
| 12 |         |         |        |       |       |       |       |       |       |       |       |       |
| 13 |         |         |        |       |       |       |       |       |       |       |       |       |
| 14 |         |         |        |       |       |       |       |       |       |       |       |       |
| 15 |         |         |        |       |       |       |       |       |       |       |       |       |
| 16 |         |         |        |       |       |       |       |       |       |       |       |       |
| 17 |         |         |        |       |       |       |       |       |       |       |       |       |
| 18 |         |         |        |       |       |       |       |       |       |       |       |       |
| 19 |         |         |        |       |       |       |       |       |       |       |       |       |
| 20 |         |         |        |       |       |       |       |       |       |       |       |       |
| 21 |         |         |        |       |       |       |       |       |       |       |       |       |
| 22 |         |         |        |       |       |       |       |       |       |       |       |       |
| 23 |         |         |        |       |       |       |       |       |       |       |       |       |
| 24 |         |         |        |       |       |       |       |       |       |       |       |       |
| 25 |         |         |        |       |       |       |       |       |       |       |       |       |
| 26 |         |         |        |       |       |       |       |       |       |       |       |       |

Transform:  
Y=Log(Y)

SourceDataforFigure2A — Edited

File Sheet Undo Clipboard Analysis Interpret Change Draw Write Text Export Print Send LA Help

10 Arial

Prism8

Search ANOVA results Multiple comparisons

▼ Data Tables

- TNF
- IL-6
- IL-10
- IL-1beta
- New Data Table...

▼ Info

- Project info 1
- Project info 1
- New Info...

▼ Results

- Transpose of TNF
- Transform of TNF
- RM one-way ANOVA of Transform of TNF**
- Transpose of IL-6
- Transform of IL-6
- RM one-way ANOVA of Transform of IL-6
- Transpose of IL-10

Family

- TNF
- Transpose
- Transform of TNF
- RM one-way ANOVA**

| RM one-way ANOVA |                                           |                  |           |           |                          |                |
|------------------|-------------------------------------------|------------------|-----------|-----------|--------------------------|----------------|
| ANOVA results    |                                           |                  |           |           |                          |                |
| 1                | Table Analyzed                            | Transform of TNF |           |           |                          |                |
| 2                |                                           |                  |           |           |                          |                |
| 3                | <b>Repeated measures ANOVA summary</b>    |                  |           |           |                          |                |
| 4                | Assume sphericity?                        | No               |           |           |                          |                |
| 5                | F                                         | 122.3            |           |           |                          |                |
| 6                | P value                                   | <0.0001          |           |           |                          |                |
| 7                | P value summary                           | ****             |           |           |                          |                |
| 8                | Statistically significant (P < 0.05)?     | Yes              |           |           |                          |                |
| 9                | Geisser-Greenhouse's epsilon              | 0.5066           |           |           |                          |                |
| 10               | R square                                  | 0.9532           |           |           |                          |                |
| 11               |                                           |                  |           |           |                          |                |
| 12               | <b>Was the matching effective?</b>        |                  |           |           |                          |                |
| 13               | F                                         | 3.382            |           |           |                          |                |
| 14               | P value                                   | 0.0146           |           |           |                          |                |
| 15               | P value summary                           | *                |           |           |                          |                |
| 16               | Is there significant matching (P < 0.05)? | Yes              |           |           |                          |                |
| 17               | R square                                  | 0.03804          |           |           |                          |                |
| 18               |                                           |                  |           |           |                          |                |
| 19               | <b>ANOVA table</b>                        | <b>SS</b>        | <b>DF</b> | <b>MS</b> | <b>F (DFn, DFd)</b>      | <b>P value</b> |
| 20               | Treatment (between columns)               | 40.07            | 4         | 10.02     | F (2.026, 12.16) = 122.3 | P<0.0001       |
| 21               | Individual (between rows)                 | 1.662            | 6         | 0.2770    | F (6, 24) = 3.382        | P=0.0146       |
| 22               | Residual (random)                         | 1.966            | 24        | 0.08190   |                          |                |
| 23               | Total                                     | 43.69            | 34        |           |                          |                |
| 24               |                                           |                  |           |           |                          |                |
| 25               | <b>Data summary</b>                       |                  |           |           |                          |                |

RM one-way ANOVA of Transform of TNF Row 1, Column A

SourceDataforFigure2A — Edited

File Sheet Undo Clipboard Analysis Interpret Change Draw Write Text Export Print Send LA Help

Prism8

Search ANOVA results Multiple comparisons

▼ Data Tables

- TNF
- IL-6
- IL-10
- IL-1beta
- New Data Table...

▼ Info

- Project info 1
- Project info 1
- New Info...

▼ Results

- Transpose of TNF
- Transform of TNF
- RM one-way ANOVA of Transform of TNF**
- Transpose of IL-6
- Transform of IL-6
- RM one-way ANOVA of Transform of IL-6
- Transpose of IL-10

Family

- TNF
- Transpose
- Transform of TNF
- RM one-way ANOVA**

| RM one-way ANOVA     |                                         |                           |                     |                    |                         |            |                    |
|----------------------|-----------------------------------------|---------------------------|---------------------|--------------------|-------------------------|------------|--------------------|
| Multiple comparisons |                                         |                           |                     |                    |                         |            |                    |
| 1                    | Number of families                      |                           |                     |                    |                         |            |                    |
| 2                    | Number of comparisons per family        |                           |                     |                    |                         |            |                    |
| 3                    | Alpha                                   |                           |                     |                    |                         |            |                    |
| 4                    |                                         |                           |                     |                    |                         |            |                    |
| 5                    | <b>Bonferroni's multiple comparison</b> | <b>95.00% CI of diff.</b> | <b>Significant?</b> | <b>Summary</b>     | <b>Adjusted P Value</b> | <b>B-?</b> |                    |
| 6                    | RBCL vs. Control                        | -0.1701 to 0.5767         | No                  | ns                 | 0.4145                  | A          | Control            |
| 7                    | RBCL vs. iRBCL                          | -1.060 to 0.01158         | No                  | ns                 | 0.0549                  | C          | iRBCL              |
| 8                    | RBCL vs. XO                             | -2.523 to -1.247          | Yes                 | ***                | 0.0002                  | D          | XO                 |
| 9                    | RBCL vs. LPS                            | -3.211 to -1.810          | Yes                 | ****               | <0.0001                 | E          | LPS                |
| 10                   |                                         |                           |                     |                    |                         |            |                    |
| 11                   | <b>Test details</b>                     | <b>Mean 2</b>             | <b>Mean Diff.</b>   | <b>SE of diff.</b> | <b>n1</b>               | <b>n2</b>  | <b>t</b> <b>DF</b> |
| 12                   | RBCL vs. Control                        | 0.000                     | 0.2033              | 0.1060             | 7                       | 7          | 1.918 6            |
| 13                   | RBCL vs. iRBCL                          | 0.7277                    | -0.5244             | 0.1522             | 7                       | 7          | 3.445 6            |
| 14                   | RBCL vs. XO                             | 2.088                     | -1.885              | 0.1811             | 7                       | 7          | 10.41 6            |
| 15                   | RBCL vs. LPS                            | 2.714                     | -2.511              | 0.1989             | 7                       | 7          | 12.62 6            |
| 16                   |                                         |                           |                     |                    |                         |            |                    |
| 17                   |                                         |                           |                     |                    |                         |            |                    |
| 18                   |                                         |                           |                     |                    |                         |            |                    |
| 19                   |                                         |                           |                     |                    |                         |            |                    |
| 20                   |                                         |                           |                     |                    |                         |            |                    |
| 21                   |                                         |                           |                     |                    |                         |            |                    |
| 22                   |                                         |                           |                     |                    |                         |            |                    |
| 23                   |                                         |                           |                     |                    |                         |            |                    |
| 24                   |                                         |                           |                     |                    |                         |            |                    |
| 25                   |                                         |                           |                     |                    |                         |            |                    |

RM one-way ANOVA of Transform of TNF Row 1, Column A



|    |         | A       | B      | C      | D        | E         | F     | G     | H     | I     | J     | K     |
|----|---------|---------|--------|--------|----------|-----------|-------|-------|-------|-------|-------|-------|
|    |         | Control | RBCL   | iRBCL  | XO       | LPS       | Title | Title | Title | Title | Title | Title |
|    |         | Y       | Y      | Y      | Y        | Y         | Y     | Y     | Y     | Y     | Y     | Y     |
| 1  | Donor 1 | 1.000   | 0.699  | 0.959  | 58.953   | 813.037   |       |       |       |       |       |       |
| 2  | Donor 2 | 1.000   | 5.314  | 5.442  | 287.263  | 991.387   |       |       |       |       |       |       |
| 3  | Donor 3 | 1.000   | 0.834  | 0.963  | 60.880   | 2328.126  |       |       |       |       |       |       |
| 4  | Donor 4 | 1.000   | 2.360  | 2.960  | 1312.520 | 5126.320  |       |       |       |       |       |       |
| 5  | Donor 5 | 1.000   | 19.450 | 12.280 | 3176.950 | 10896.210 |       |       |       |       |       |       |
| 6  | Donor 6 | 1.000   | 1.000  | 6.640  | 1051.820 | 3265.930  |       |       |       |       |       |       |
| 7  | Donor 7 | 1.000   | 1.000  | 9.380  | 899.220  | 5290.130  |       |       |       |       |       |       |
| 8  |         |         |        |        |          |           |       |       |       |       |       |       |
| 9  |         |         |        |        |          |           |       |       |       |       |       |       |
| 10 |         |         |        |        |          |           |       |       |       |       |       |       |
| 11 |         |         |        |        |          |           |       |       |       |       |       |       |
| 12 |         |         |        |        |          |           |       |       |       |       |       |       |
| 13 |         |         |        |        |          |           |       |       |       |       |       |       |
| 14 |         |         |        |        |          |           |       |       |       |       |       |       |
| 15 |         |         |        |        |          |           |       |       |       |       |       |       |
| 16 |         |         |        |        |          |           |       |       |       |       |       |       |
| 17 |         |         |        |        |          |           |       |       |       |       |       |       |
| 18 |         |         |        |        |          |           |       |       |       |       |       |       |
| 19 |         |         |        |        |          |           |       |       |       |       |       |       |
| 20 |         |         |        |        |          |           |       |       |       |       |       |       |
| 21 |         |         |        |        |          |           |       |       |       |       |       |       |
| 22 |         |         |        |        |          |           |       |       |       |       |       |       |
| 23 |         |         |        |        |          |           |       |       |       |       |       |       |
| 24 |         |         |        |        |          |           |       |       |       |       |       |       |
| 25 |         |         |        |        |          |           |       |       |       |       |       |       |
| 26 |         |         |        |        |          |           |       |       |       |       |       |       |

|    |         | A       | B      | C      | D     | E     | F     | G     | H     | I     | J     | K     |
|----|---------|---------|--------|--------|-------|-------|-------|-------|-------|-------|-------|-------|
|    |         | Control | RBCL   | iRBCL  | XO    | LPS   | Title | Title | Title | Title | Title | Title |
|    |         | Y       | Y      | Y      | Y     | Y     | Y     | Y     | Y     | Y     | Y     | Y     |
| 1  | Donor 1 | 0.000   | -0.156 | -0.018 | 1.771 | 2.910 |       |       |       |       |       |       |
| 2  | Donor 2 | 0.000   | 0.725  | 0.736  | 2.458 | 2.996 |       |       |       |       |       |       |
| 3  | Donor 3 | 0.000   | -0.079 | -0.016 | 1.784 | 3.367 |       |       |       |       |       |       |
| 4  | Donor 4 | 0.000   | 0.373  | 0.471  | 3.118 | 3.710 |       |       |       |       |       |       |
| 5  | Donor 5 | 0.000   | 1.289  | 1.089  | 3.502 | 4.037 |       |       |       |       |       |       |
| 6  | Donor 6 | 0.000   | 0.000  | 0.822  | 3.022 | 3.514 |       |       |       |       |       |       |
| 7  | Donor 7 | 0.000   | 0.000  | 0.972  | 2.954 | 3.723 |       |       |       |       |       |       |
| 8  |         |         |        |        |       |       |       |       |       |       |       |       |
| 9  |         |         |        |        |       |       |       |       |       |       |       |       |
| 10 |         |         |        |        |       |       |       |       |       |       |       |       |
| 11 |         |         |        |        |       |       |       |       |       |       |       |       |
| 12 |         |         |        |        |       |       |       |       |       |       |       |       |
| 13 |         |         |        |        |       |       |       |       |       |       |       |       |
| 14 |         |         |        |        |       |       |       |       |       |       |       |       |
| 15 |         |         |        |        |       |       |       |       |       |       |       |       |
| 16 |         |         |        |        |       |       |       |       |       |       |       |       |
| 17 |         |         |        |        |       |       |       |       |       |       |       |       |
| 18 |         |         |        |        |       |       |       |       |       |       |       |       |
| 19 |         |         |        |        |       |       |       |       |       |       |       |       |
| 20 |         |         |        |        |       |       |       |       |       |       |       |       |
| 21 |         |         |        |        |       |       |       |       |       |       |       |       |
| 22 |         |         |        |        |       |       |       |       |       |       |       |       |
| 23 |         |         |        |        |       |       |       |       |       |       |       |       |
| 24 |         |         |        |        |       |       |       |       |       |       |       |       |
| 25 |         |         |        |        |       |       |       |       |       |       |       |       |
| 26 |         |         |        |        |       |       |       |       |       |       |       |       |

Transform:  
Y=Log(Y)

SourceDataforFigure2A — Edited

File Sheet Undo Clipboard Analysis Interpret Change Draw Write Text Export Print Send LA Help

Prism 8

Search ANOVA results Multiple comparisons

Info Project info 1

Results

- Transpose of TNF
- Transform of TNF
- RM one-way ANOVA of Transform of TNF
- Transpose of IL-6
- Transform of IL-6
- RM one-way ANOVA of Transform of IL-6**
- Transpose of IL-10
- Transform of IL-10
- RM one-way ANOVA of Transform of IL-10
- Transpose of IL-1beta
- Transform of IL-1beta
- RM one-way ANOVA of Transform of IL-1beta

Graphs

Family

- IL-6
  - Transpose
  - Transform of IL-6
  - RM one-way ANOVA**

| ANOVA results           |                                           | Multiple comparisons |           |           |                          |                |
|-------------------------|-------------------------------------------|----------------------|-----------|-----------|--------------------------|----------------|
| <b>RM one-way ANOVA</b> |                                           |                      |           |           |                          |                |
| ANOVA results           |                                           |                      |           |           |                          |                |
| 1                       | Table Analyzed                            | Transform of IL-6    |           |           |                          |                |
| 2                       |                                           |                      |           |           |                          |                |
| 3                       | <b>Repeated measures ANOVA summary</b>    |                      |           |           |                          |                |
| 4                       | Assume sphericity?                        | No                   |           |           |                          |                |
| 5                       | F                                         | 148.2                |           |           |                          |                |
| 6                       | P value                                   | <0.0001              |           |           |                          |                |
| 7                       | P value summary                           | ****                 |           |           |                          |                |
| 8                       | Statistically significant (P < 0.05)?     | Yes                  |           |           |                          |                |
| 9                       | Geisser-Greenhouse's epsilon              | 0.6553               |           |           |                          |                |
| 10                      | R square                                  | 0.9611               |           |           |                          |                |
| 11                      |                                           |                      |           |           |                          |                |
| 12                      | <b>Was the matching effective?</b>        |                      |           |           |                          |                |
| 13                      | F                                         | 5.693                |           |           |                          |                |
| 14                      | P value                                   | 0.0009               |           |           |                          |                |
| 15                      | P value summary                           | ***                  |           |           |                          |                |
| 16                      | Is there significant matching (P < 0.05)? | Yes                  |           |           |                          |                |
| 17                      | R square                                  | 0.05247              |           |           |                          |                |
| 18                      |                                           |                      |           |           |                          |                |
| 19                      | <b>ANOVA table</b>                        | <b>SS</b>            | <b>DF</b> | <b>MS</b> | <b>F (DFn, DFd)</b>      | <b>P value</b> |
| 20                      | Treatment (between columns)               | 67.73                | 4         | 16.93     | F (2.621, 15.73) = 148.2 | P<0.0001       |
| 21                      | Individual (between rows)                 | 3.902                | 6         | 0.6504    | F (6, 24) = 5.693        | P=0.0009       |
| 22                      | Residual (random)                         | 2.742                | 24        | 0.1143    |                          |                |
| 23                      | Total                                     | 74.38                | 34        |           |                          |                |
| 24                      |                                           |                      |           |           |                          |                |
| 25                      | <b>Data summary</b>                       |                      |           |           |                          |                |

RM one-way ANOVA of Transform of IL-6 Row 1, Column A

SourceDataforFigure2A — Edited

File Sheet Undo Clipboard Analysis Interpret Change Draw Write Text Export Print Send LA Help

Prism 8

Search ANOVA results Multiple comparisons

Info Project info 1  
 + New Info...  
 Results  
 Transpose of TNF  
 Transform of TNF  
 RM one-way ANOVA of Transform of TNF  
 Transpose of IL-6  
 Transform of IL-6  
 RM one-way ANOVA of Transform of IL-6  
 Transpose of IL-10  
 Transform of IL-10  
 RM one-way ANOVA of Transform of IL-10  
 Transpose of IL-1beta  
 Transform of IL-1beta  
 RM one-way ANOVA of Transform of IL-1beta  
 + New Analysis...  
 Graphs  
 TNF

Family  
 IL-6  
 Transpose  
 Transform of IL-6  
 RM one-way ANOVA

| RM one-way ANOVA |                                         | Multiple comparisons      |                     |                    |                         |            |          |           |
|------------------|-----------------------------------------|---------------------------|---------------------|--------------------|-------------------------|------------|----------|-----------|
| 1                | Number of families                      |                           |                     |                    |                         |            |          |           |
| 2                | Number of comparisons per               |                           |                     |                    |                         |            |          |           |
| 3                | Alpha                                   |                           |                     |                    |                         |            |          |           |
| 4                |                                         |                           |                     |                    |                         |            |          |           |
| 5                | <b>Bonferroni's multiple comparison</b> | <b>95.00% CI of diff.</b> | <b>Significant?</b> | <b>Summary</b>     | <b>Adjusted P Value</b> | <b>B-?</b> |          |           |
| 6                | RBCL vs. Control                        | -0.3998 to 1.015          | No                  | ns                 | 0.7067                  | A          | Control  |           |
| 7                | RBCL vs. iRBCL                          | -0.8611 to 0.3173         | No                  | ns                 | 0.6211                  | C          | iRBCL    |           |
| 8                | RBCL vs. XO                             | -3.078 to -1.624          | Yes                 | ***                | 0.0001                  | D          | XO       |           |
| 9                | RBCL vs. LPS                            | -3.829 to -2.487          | Yes                 | ****               | <0.0001                 | E          | LPS      |           |
| 10               |                                         |                           |                     |                    |                         |            |          |           |
| 11               | <b>Test details</b>                     | <b>Mean 2</b>             | <b>Mean Diff.</b>   | <b>SE of diff.</b> | <b>n1</b>               | <b>n2</b>  | <b>t</b> | <b>DF</b> |
| 12               | RBCL vs. Control                        | 0.000                     | 0.3075              | 0.2009             | 7                       | 7          | 1.531    | 6         |
| 13               | RBCL vs. iRBCL                          | 0.5795                    | -0.2719             | 0.1673             | 7                       | 7          | 1.625    | 6         |
| 14               | RBCL vs. XO                             | 2.658                     | -2.351              | 0.2064             | 7                       | 7          | 11.39    | 6         |
| 15               | RBCL vs. LPS                            | 3.465                     | -3.158              | 0.1905             | 7                       | 7          | 16.57    | 6         |
| 16               |                                         |                           |                     |                    |                         |            |          |           |
| 17               |                                         |                           |                     |                    |                         |            |          |           |
| 18               |                                         |                           |                     |                    |                         |            |          |           |
| 19               |                                         |                           |                     |                    |                         |            |          |           |
| 20               |                                         |                           |                     |                    |                         |            |          |           |
| 21               |                                         |                           |                     |                    |                         |            |          |           |
| 22               |                                         |                           |                     |                    |                         |            |          |           |
| 23               |                                         |                           |                     |                    |                         |            |          |           |
| 24               |                                         |                           |                     |                    |                         |            |          |           |
| 25               |                                         |                           |                     |                    |                         |            |          |           |

RM one-way ANOVA of Transform of IL-6 Row 1, Column A

SourceDataforFigure2A — Edited

File Sheet Undo Clipboard Analysis Interpret Change Draw Write Text Export Print Send LA Help

Prism 8

Search

▼ Info Project info 1

⊕ New Info...

▼ Results

- Transpose of TNF
- Transform of TNF
- RM one-way ANOVA of Transform of TNF
- Transpose of IL-6
- Transform of IL-6
- RM one-way ANOVA of Transform of IL-6
- Transpose of IL-10**
- Transform of IL-10**
- RM one-way ANOVA of Transform of IL-10**
- Transpose of IL-1beta
- Transform of IL-1beta
- RM one-way ANOVA of Transform of IL-1beta

⊕ New Analysis...

▼ Graphs

- TNF

Family

- IL-10**
  - Transpose**
    - Transform of IL-10**
      - RM one-way ANOVA**

| Transpose |         | A       | B     | C     | D      | E       | F     | G     | H     | I     | J     | K     |
|-----------|---------|---------|-------|-------|--------|---------|-------|-------|-------|-------|-------|-------|
|           |         | Control | RBCL  | iRBCL | XO     | LPS     | Title | Title | Title | Title | Title | Title |
|           |         | Y       | Y     | Y     | Y      | Y       | Y     | Y     | Y     | Y     | Y     | Y     |
| 1         | Donor 1 | 1.000   | 0.822 | 3.083 | 13.964 | 35.055  |       |       |       |       |       |       |
| 2         | Donor 2 | 1.000   | 2.071 | 2.717 | 5.479  | 103.673 |       |       |       |       |       |       |
| 3         | Donor 3 | 1.000   | 1.727 | 1.409 | 3.955  | 80.273  |       |       |       |       |       |       |
| 4         | Donor 4 | 1.000   | 1.000 | 1.000 | 5.760  | 33.740  |       |       |       |       |       |       |
| 5         | Donor 5 | 1.000   | 2.510 | 2.410 | 18.800 | 35.260  |       |       |       |       |       |       |
| 6         | Donor 6 | 1.000   | 1.000 | 1.000 | 4.550  | 4.920   |       |       |       |       |       |       |
| 7         | Donor 7 | 1.000   | 1.000 | 2.080 | 6.150  | 13.710  |       |       |       |       |       |       |
| 8         |         |         |       |       |        |         |       |       |       |       |       |       |
| 9         |         |         |       |       |        |         |       |       |       |       |       |       |
| 10        |         |         |       |       |        |         |       |       |       |       |       |       |
| 11        |         |         |       |       |        |         |       |       |       |       |       |       |
| 12        |         |         |       |       |        |         |       |       |       |       |       |       |
| 13        |         |         |       |       |        |         |       |       |       |       |       |       |
| 14        |         |         |       |       |        |         |       |       |       |       |       |       |
| 15        |         |         |       |       |        |         |       |       |       |       |       |       |
| 16        |         |         |       |       |        |         |       |       |       |       |       |       |
| 17        |         |         |       |       |        |         |       |       |       |       |       |       |
| 18        |         |         |       |       |        |         |       |       |       |       |       |       |
| 19        |         |         |       |       |        |         |       |       |       |       |       |       |
| 20        |         |         |       |       |        |         |       |       |       |       |       |       |
| 21        |         |         |       |       |        |         |       |       |       |       |       |       |
| 22        |         |         |       |       |        |         |       |       |       |       |       |       |
| 23        |         |         |       |       |        |         |       |       |       |       |       |       |
| 24        |         |         |       |       |        |         |       |       |       |       |       |       |
| 25        |         |         |       |       |        |         |       |       |       |       |       |       |
| 26        |         |         |       |       |        |         |       |       |       |       |       |       |

Transpose of IL-10

Row 1, A: Control

| Transform |         | A       | B      | C     | D     | E     | F     | G     | H     | I     | J     | K     |
|-----------|---------|---------|--------|-------|-------|-------|-------|-------|-------|-------|-------|-------|
|           |         | Control | RBCL   | iRBCL | XO    | LPS   | Title | Title | Title | Title | Title | Title |
|           |         | Y       | Y      | Y     | Y     | Y     | Y     | Y     | Y     | Y     | Y     | Y     |
| 1         | Donor 1 | 0.000   | -0.085 | 0.489 | 1.145 | 1.545 |       |       |       |       |       |       |
| 2         | Donor 2 | 0.000   | 0.316  | 0.434 | 0.739 | 2.016 |       |       |       |       |       |       |
| 3         | Donor 3 | 0.000   | 0.237  | 0.149 | 0.597 | 1.905 |       |       |       |       |       |       |
| 4         | Donor 4 | 0.000   | 0.000  | 0.000 | 0.760 | 1.528 |       |       |       |       |       |       |
| 5         | Donor 5 | 0.000   | 0.400  | 0.382 | 1.274 | 1.547 |       |       |       |       |       |       |
| 6         | Donor 6 | 0.000   | 0.000  | 0.000 | 0.658 | 0.692 |       |       |       |       |       |       |
| 7         | Donor 7 | 0.000   | 0.000  | 0.318 | 0.789 | 1.137 |       |       |       |       |       |       |
| 8         |         |         |        |       |       |       |       |       |       |       |       |       |
| 9         |         |         |        |       |       |       |       |       |       |       |       |       |
| 10        |         |         |        |       |       |       |       |       |       |       |       |       |
| 11        |         |         |        |       |       |       |       |       |       |       |       |       |
| 12        |         |         |        |       |       |       |       |       |       |       |       |       |
| 13        |         |         |        |       |       |       |       |       |       |       |       |       |
| 14        |         |         |        |       |       |       |       |       |       |       |       |       |
| 15        |         |         |        |       |       |       |       |       |       |       |       |       |
| 16        |         |         |        |       |       |       |       |       |       |       |       |       |
| 17        |         |         |        |       |       |       |       |       |       |       |       |       |
| 18        |         |         |        |       |       |       |       |       |       |       |       |       |
| 19        |         |         |        |       |       |       |       |       |       |       |       |       |
| 20        |         |         |        |       |       |       |       |       |       |       |       |       |
| 21        |         |         |        |       |       |       |       |       |       |       |       |       |
| 22        |         |         |        |       |       |       |       |       |       |       |       |       |
| 23        |         |         |        |       |       |       |       |       |       |       |       |       |
| 24        |         |         |        |       |       |       |       |       |       |       |       |       |
| 25        |         |         |        |       |       |       |       |       |       |       |       |       |
| 26        |         |         |        |       |       |       |       |       |       |       |       |       |

Transform:  
Y=Log(Y)

SourceDataforFigure2A — Edited

File Sheet Undo Clipboard Analysis Interpret Change Draw Write Text Export Print Send LA Help

Prism8

Search ANOVA results Multiple comparisons

Info Project info 1

Results

- Transpose of TNF
- Transform of TNF
- RM one-way ANOVA of Transform of TNF
- Transpose of IL-6
- Transform of IL-6
- RM one-way ANOVA of Transform of IL-6
- Transpose of IL-10
- Transform of IL-10
- RM one-way ANOVA of Transform of IL-10**
- Transpose of IL-1beta
- Transform of IL-1beta
- RM one-way ANOVA of Transform of IL-1beta

Graphs

Family

- IL-10
  - Transpose
  - Transform of IL-10
  - RM one-way ANOVA**

| RM one-way ANOVA |                                           |                    |           |           |                          |                |
|------------------|-------------------------------------------|--------------------|-----------|-----------|--------------------------|----------------|
| ANOVA results    |                                           |                    |           |           |                          |                |
| 1                | Table Analyzed                            | Transform of IL-10 |           |           |                          |                |
| 2                |                                           |                    |           |           |                          |                |
| 3                | <b>Repeated measures ANOVA summary</b>    |                    |           |           |                          |                |
| 4                | Assume sphericity?                        | No                 |           |           |                          |                |
| 5                | F                                         | 49.36              |           |           |                          |                |
| 6                | P value                                   | <0.0001            |           |           |                          |                |
| 7                | P value summary                           | ****               |           |           |                          |                |
| 8                | Statistically significant (P < 0.05)?     | Yes                |           |           |                          |                |
| 9                | Geisser-Greenhouse's epsilon              | 0.4940             |           |           |                          |                |
| 10               | R square                                  | 0.8916             |           |           |                          |                |
| 11               |                                           |                    |           |           |                          |                |
| 12               | <b>Was the matching effective?</b>        |                    |           |           |                          |                |
| 13               | F                                         | 2.367              |           |           |                          |                |
| 14               | P value                                   | 0.0614             |           |           |                          |                |
| 15               | P value summary                           | ns                 |           |           |                          |                |
| 16               | Is there significant matching (P < 0.05)? | No                 |           |           |                          |                |
| 17               | R square                                  | 0.06027            |           |           |                          |                |
| 18               |                                           |                    |           |           |                          |                |
| 19               | <b>ANOVA table</b>                        | <b>SS</b>          | <b>DF</b> | <b>MS</b> | <b>F (DFn, DFd)</b>      | <b>P value</b> |
| 20               | Treatment (between columns)               | 10.71              | 4         | 2.678     | F (1.976, 11.85) = 49.36 | P<0.0001       |
| 21               | Individual (between rows)                 | 0.7705             | 6         | 0.1284    | F (6, 24) = 2.367        | P=0.0614       |
| 22               | Residual (random)                         | 1.302              | 24        | 0.05426   |                          |                |
| 23               | Total                                     | 12.78              | 34        |           |                          |                |
| 24               |                                           |                    |           |           |                          |                |
| 25               | <b>Data summary</b>                       |                    |           |           |                          |                |

RM one-way ANOVA of Transform of IL-10 Row 1, Column A

SourceDataforFigure2A — Edited

File Sheet Undo Clipboard Analysis Interpret Change Draw Write Text Export Print Send LA Help

Prism 8

Search ANOVA results Multiple comparisons

Info Project info 1

New Info...

Results

- Transpose of TNF
- Transform of TNF
- RM one-way ANOVA of Transform of TNF
- Transpose of IL-6
- Transform of IL-6
- RM one-way ANOVA of Transform of IL-6
- Transpose of IL-10
- Transform of IL-10
- RM one-way ANOVA of Transform of IL-10**
- Transpose of IL-1beta
- Transform of IL-1beta
- RM one-way ANOVA of Transform of IL-1beta

New Analysis...

Graphs

- TNF

Family

- IL-10
  - Transpose
  - Transform of IL-10
  - RM one-way ANOVA**

| RM one-way ANOVA |                                   | Multiple comparisons      |                     |                    |                         |            |          |           |
|------------------|-----------------------------------|---------------------------|---------------------|--------------------|-------------------------|------------|----------|-----------|
| 1                | Number of families                |                           |                     |                    |                         |            |          |           |
| 2                | Number of comparisons per         |                           |                     |                    |                         |            |          |           |
| 3                | Alpha                             |                           |                     |                    |                         |            |          |           |
| 4                |                                   |                           |                     |                    |                         |            |          |           |
| 5                | <b>Bonferroni's multiple comp</b> | <b>95.00% CI of diff.</b> | <b>Significant?</b> | <b>Summary</b>     | <b>Adjusted P Value</b> | <b>B-?</b> |          |           |
| 6                | RBCL vs. Control                  | -0.1283 to 0.3763         | No                  | ns                 | 0.5371                  | A          | Control  |           |
| 7                | RBCL vs. iRBCL                    | -0.4442 to 0.1858         | No                  | ns                 | 0.7955                  | C          | iRBCL    |           |
| 8                | RBCL vs. XO                       | -1.117 to -0.3389         | Yes                 | **                 | 0.0023                  | D          | XO       |           |
| 9                | RBCL vs. LPS                      | -1.859 to -0.8559         | Yes                 | ***                | 0.0003                  | E          | LPS      |           |
| 10               |                                   |                           |                     |                    |                         |            |          |           |
| 11               | <b>Test details</b>               | <b>Mean 2</b>             | <b>Mean Diff.</b>   | <b>SE of diff.</b> | <b>n1</b>               | <b>n2</b>  | <b>t</b> | <b>DF</b> |
| 12               | RBCL vs. Control                  | 0.000                     | 0.1240              | 0.07166            | 7                       | 7          | 1.730    | 6         |
| 13               | RBCL vs. iRBCL                    | 0.2532                    | -0.1292             | 0.08946            | 7                       | 7          | 1.444    | 6         |
| 14               | RBCL vs. XO                       | 0.8518                    | -0.7278             | 0.1104             | 7                       | 7          | 6.590    | 6         |
| 15               | RBCL vs. LPS                      | 1.481                     | -1.357              | 0.1424             | 7                       | 7          | 9.531    | 6         |
| 16               |                                   |                           |                     |                    |                         |            |          |           |
| 17               |                                   |                           |                     |                    |                         |            |          |           |
| 18               |                                   |                           |                     |                    |                         |            |          |           |
| 19               |                                   |                           |                     |                    |                         |            |          |           |
| 20               |                                   |                           |                     |                    |                         |            |          |           |
| 21               |                                   |                           |                     |                    |                         |            |          |           |
| 22               |                                   |                           |                     |                    |                         |            |          |           |
| 23               |                                   |                           |                     |                    |                         |            |          |           |
| 24               |                                   |                           |                     |                    |                         |            |          |           |
| 25               |                                   |                           |                     |                    |                         |            |          |           |

RM one-way ANOVA of Transform of IL-10 Row 1, Column A



SourceDataforFigure2A — Edited

File Sheet Undo Clipboard Analysis Interpret Change Draw Write Text Export Print Send LA Help

Prism 8

Search

▼ Info Project info 1

⊕ New Info...

▼ Results

- Transpose of TNF
- Transform of TNF
- RM one-way ANOVA of Transform of TNF
- Transpose of IL-6
- Transform of IL-6
- RM one-way ANOVA of Transform of IL-6
- Transpose of IL-10
- Transform of IL-10
- RM one-way ANOVA of Transform of IL-10
- Transpose of IL-1beta**
- Transform of IL-1beta
- RM one-way ANOVA of Transform of IL-1beta

⊕ New Analysis...

▼ Graphs

- TNF

Family

- IL-1beta**
  - Transpose**
    - Transform of IL-1beta
    - RM one-way ANOVA

|    |         | A       | B     | C     | D      | E      | F     | G     | H     | I     | J     | K     |
|----|---------|---------|-------|-------|--------|--------|-------|-------|-------|-------|-------|-------|
|    |         | Control | RBCL  | iRBCL | XO     | LPS    | Title | Title | Title | Title | Title | Title |
|    |         | Y       | Y     | Y     | Y      | Y      | Y     | Y     | Y     | Y     | Y     | Y     |
| 1  | Donor 1 | 1.000   | 1.000 | 1.000 | 38.450 | 86.730 |       |       |       |       |       |       |
| 2  | Donor 2 | 1.000   | 6.487 | 3.741 | 7.575  | 46.472 |       |       |       |       |       |       |
| 3  | Donor 3 | 1.000   | 1.000 | 1.000 | 1.000  | 9.880  |       |       |       |       |       |       |
| 4  | Donor 4 | 1.000   | 1.000 | 1.000 | 29.880 | 29.880 |       |       |       |       |       |       |
| 5  | Donor 5 | 1.000   | 1.000 | 1.000 | 20.480 | 20.480 |       |       |       |       |       |       |
| 6  | Donor 6 | 1.000   | 1.000 | 1.000 | 19.940 | 19.940 |       |       |       |       |       |       |
| 7  | Donor 7 | 1.000   | 1.000 | 1.000 | 6.030  | 6.030  |       |       |       |       |       |       |
| 8  |         |         |       |       |        |        |       |       |       |       |       |       |
| 9  |         |         |       |       |        |        |       |       |       |       |       |       |
| 10 |         |         |       |       |        |        |       |       |       |       |       |       |
| 11 |         |         |       |       |        |        |       |       |       |       |       |       |
| 12 |         |         |       |       |        |        |       |       |       |       |       |       |
| 13 |         |         |       |       |        |        |       |       |       |       |       |       |
| 14 |         |         |       |       |        |        |       |       |       |       |       |       |
| 15 |         |         |       |       |        |        |       |       |       |       |       |       |
| 16 |         |         |       |       |        |        |       |       |       |       |       |       |
| 17 |         |         |       |       |        |        |       |       |       |       |       |       |
| 18 |         |         |       |       |        |        |       |       |       |       |       |       |
| 19 |         |         |       |       |        |        |       |       |       |       |       |       |
| 20 |         |         |       |       |        |        |       |       |       |       |       |       |
| 21 |         |         |       |       |        |        |       |       |       |       |       |       |
| 22 |         |         |       |       |        |        |       |       |       |       |       |       |
| 23 |         |         |       |       |        |        |       |       |       |       |       |       |
| 24 |         |         |       |       |        |        |       |       |       |       |       |       |
| 25 |         |         |       |       |        |        |       |       |       |       |       |       |
| 26 |         |         |       |       |        |        |       |       |       |       |       |       |

Transpose of IL-1beta

Row 1, A: Control

| Transform |         | A       | B     | C     | D     | E     | F     | G     | H     | I     | J     | K     |
|-----------|---------|---------|-------|-------|-------|-------|-------|-------|-------|-------|-------|-------|
|           |         | Control | RBCL  | iRBCL | XO    | LPS   | Title | Title | Title | Title | Title | Title |
|           |         | Y       | Y     | Y     | Y     | Y     | Y     | Y     | Y     | Y     | Y     | Y     |
| 1         | Donor 1 | 0.000   | 0.000 | 0.000 | 1.585 | 1.938 |       |       |       |       |       |       |
| 2         | Donor 2 | 0.000   | 0.812 | 0.573 | 0.879 | 1.667 |       |       |       |       |       |       |
| 3         | Donor 3 | 0.000   | 0.000 | 0.000 | 0.000 | 0.995 |       |       |       |       |       |       |
| 4         | Donor 4 | 0.000   | 0.000 | 0.000 | 1.475 | 1.475 |       |       |       |       |       |       |
| 5         | Donor 5 | 0.000   | 0.000 | 0.000 | 1.311 | 1.311 |       |       |       |       |       |       |
| 6         | Donor 6 | 0.000   | 0.000 | 0.000 | 1.300 | 1.300 |       |       |       |       |       |       |
| 7         | Donor 7 | 0.000   | 0.000 | 0.000 | 0.780 | 0.780 |       |       |       |       |       |       |
| 8         |         |         |       |       |       |       |       |       |       |       |       |       |
| 9         |         |         |       |       |       |       |       |       |       |       |       |       |
| 10        |         |         |       |       |       |       |       |       |       |       |       |       |
| 11        |         |         |       |       |       |       |       |       |       |       |       |       |
| 12        |         |         |       |       |       |       |       |       |       |       |       |       |
| 13        |         |         |       |       |       |       |       |       |       |       |       |       |
| 14        |         |         |       |       |       |       |       |       |       |       |       |       |
| 15        |         |         |       |       |       |       |       |       |       |       |       |       |
| 16        |         |         |       |       |       |       |       |       |       |       |       |       |
| 17        |         |         |       |       |       |       |       |       |       |       |       |       |
| 18        |         |         |       |       |       |       |       |       |       |       |       |       |
| 19        |         |         |       |       |       |       |       |       |       |       |       |       |
| 20        |         |         |       |       |       |       |       |       |       |       |       |       |
| 21        |         |         |       |       |       |       |       |       |       |       |       |       |
| 22        |         |         |       |       |       |       |       |       |       |       |       |       |
| 23        |         |         |       |       |       |       |       |       |       |       |       |       |
| 24        |         |         |       |       |       |       |       |       |       |       |       |       |
| 25        |         |         |       |       |       |       |       |       |       |       |       |       |
| 26        |         |         |       |       |       |       |       |       |       |       |       |       |

Transform:  
Y=Log(Y)

SourceDataforFigure2A — Edited

File Sheet Undo Clipboard Analysis Interpret Change Draw Write Text Export Print Send LA Help

Prism 8

Search ANOVA results Multiple comparisons

Info Project info 1

New Info...

Results

- Transpose of TNF
- Transform of TNF
- RM one-way ANOVA of Transform of TNF
- Transpose of IL-6
- Transform of IL-6
- RM one-way ANOVA of Transform of IL-6
- Transpose of IL-10
- Transform of IL-10
- RM one-way ANOVA of Transform of IL-10
- Transpose of IL-1beta
- Transform of IL-1beta
- RM one-way ANOVA of Transform of IL-1beta**

New Analysis...

Graphs

- TNF

Family

- IL-1beta
  - Transpose
  - Transform of IL-1beta
  - RM one-way ANOVA**

| RM one-way ANOVA |                                           |                       |           |           |                          |                |
|------------------|-------------------------------------------|-----------------------|-----------|-----------|--------------------------|----------------|
| ANOVA results    |                                           |                       |           |           |                          |                |
| 1                | Table Analyzed                            | Transform of IL-1beta |           |           |                          |                |
| 2                |                                           |                       |           |           |                          |                |
| 3                | <b>Repeated measures ANOVA summary</b>    |                       |           |           |                          |                |
| 4                | Assume sphericity?                        | No                    |           |           |                          |                |
| 5                | F                                         | 29.35                 |           |           |                          |                |
| 6                | P value                                   | 0.0001                |           |           |                          |                |
| 7                | P value summary                           | ***                   |           |           |                          |                |
| 8                | Statistically significant (P < 0.05)?     | Yes                   |           |           |                          |                |
| 9                | Geisser-Greenhouse's epsilon              | 0.4119                |           |           |                          |                |
| 10               | R square                                  | 0.8303                |           |           |                          |                |
| 11               |                                           |                       |           |           |                          |                |
| 12               | <b>Was the matching effective?</b>        |                       |           |           |                          |                |
| 13               | F                                         | 2.243                 |           |           |                          |                |
| 14               | P value                                   | 0.0736                |           |           |                          |                |
| 15               | P value summary                           | ns                    |           |           |                          |                |
| 16               | Is there significant matching (P < 0.05)? | No                    |           |           |                          |                |
| 17               | R square                                  | 0.08691               |           |           |                          |                |
| 18               |                                           |                       |           |           |                          |                |
| 19               | <b>ANOVA table</b>                        | <b>SS</b>             | <b>DF</b> | <b>MS</b> | <b>F (DFn, DFd)</b>      | <b>P value</b> |
| 20               | Treatment (between columns)               | 11.18                 | 4         | 2.794     | F (1.648, 9.885) = 29.35 | P=0.0001       |
| 21               | Individual (between rows)                 | 1.281                 | 6         | 0.2135    | F (6, 24) = 2.243        | P=0.0736       |
| 22               | Residual (random)                         | 2.284                 | 24        | 0.09519   |                          |                |
| 23               | Total                                     | 14.74                 | 34        |           |                          |                |
| 24               |                                           |                       |           |           |                          |                |
| 25               | <b>Data summary</b>                       |                       |           |           |                          |                |

RM one-way ANOVA of Transform of IL-1beta Row 1, Column A

SourceDataforFigure2A — Edited

File Sheet Undo Clipboard Analysis Interpret Change Draw Write Text Export Print Send LA Help

Prism 8

Search

ANOVA results Multiple comparisons

Info Project info 1

New Info...

Results

- Transpose of TNF
- Transform of TNF
- RM one-way ANOVA of Transform of TNF
- Transpose of IL-6
- Transform of IL-6
- RM one-way ANOVA of Transform of IL-6
- Transpose of IL-10
- Transform of IL-10
- RM one-way ANOVA of Transform of IL-10
- Transpose of IL-1beta
- Transform of IL-1beta
- RM one-way ANOVA of Transform of IL-1beta**

New Analysis...

Graphs

- TNF

Family

- IL-1beta
  - Transpose
  - Transform of IL-1beta
  - RM one-way ANOVA**

| RM one-way ANOVA |                                 | Multiple comparisons      |                     |                    |                         |            |          |           |  |
|------------------|---------------------------------|---------------------------|---------------------|--------------------|-------------------------|------------|----------|-----------|--|
| 1                | Number of families              |                           |                     |                    |                         |            |          |           |  |
| 2                | Number of comparisons p         |                           |                     |                    |                         |            |          |           |  |
| 3                | Alpha                           |                           |                     |                    |                         |            |          |           |  |
| 4                |                                 |                           |                     |                    |                         |            |          |           |  |
| 5                | <b>Bonferroni's multiple co</b> | <b>95.00% CI of diff.</b> | <b>Significant?</b> | <b>Summary</b>     | <b>Adjusted P Value</b> | <b>B-?</b> |          |           |  |
| 6                | RBCL vs. Control                | -0.2925 to 0.5245         | No                  | ns                 | >0.9999                 | A          | Control  |           |  |
| 7                | RBCL vs. iRBCL                  | -0.08612 to 0.1544        | No                  | ns                 | >0.9999                 | C          | iRBCL    |           |  |
| 8                | RBCL vs. XO                     | -1.814 to -0.04848        | Yes                 | *                  | 0.0397                  | D          | XO       |           |  |
| 9                | RBCL vs. LPS                    | -1.772 to -0.7010         | Yes                 | ***                | 0.0007                  | E          | LPS      |           |  |
| 10               |                                 |                           |                     |                    |                         |            |          |           |  |
| 11               | <b>Test details</b>             | <b>Mean 2</b>             | <b>Mean Diff.</b>   | <b>SE of diff.</b> | <b>n1</b>               | <b>n2</b>  | <b>t</b> | <b>DF</b> |  |
| 12               | RBCL vs. Control                | 0.000                     | 0.1160              | 0.1160             | 7                       | 7          | 1.000    | 6         |  |
| 13               | RBCL vs. iRBCL                  | 0.08185                   | 0.03416             | 0.03416            | 7                       | 7          | 1.000    | 6         |  |
| 14               | RBCL vs. XO                     | 1.047                     | -0.9313             | 0.2507             | 7                       | 7          | 3.715    | 6         |  |
| 15               | RBCL vs. LPS                    | 1.352                     | -1.236              | 0.1520             | 7                       | 7          | 8.132    | 6         |  |
| 16               |                                 |                           |                     |                    |                         |            |          |           |  |
| 17               |                                 |                           |                     |                    |                         |            |          |           |  |
| 18               |                                 |                           |                     |                    |                         |            |          |           |  |
| 19               |                                 |                           |                     |                    |                         |            |          |           |  |
| 20               |                                 |                           |                     |                    |                         |            |          |           |  |
| 21               |                                 |                           |                     |                    |                         |            |          |           |  |
| 22               |                                 |                           |                     |                    |                         |            |          |           |  |
| 23               |                                 |                           |                     |                    |                         |            |          |           |  |
| 24               |                                 |                           |                     |                    |                         |            |          |           |  |
| 25               |                                 |                           |                     |                    |                         |            |          |           |  |

RM one-way ANOVA of Transform of IL-1beta Row 1, Column A

SourceDataforFigure2B — Edited

Prism 8

File Sheet Undo Clipboard Analysis Change Import Draw Write Text Export Print Send LA Help

Q Search

▼ Data Tables

- TNF
- TNF line
- IL-6
- IL-6 line
- IL-10
- IL-10 line
- IL-1beta
- IL-1beta line
- New Data Table...

▼ Info

- Project info 1
- Project info 1
- New Info...

▼ Results

- Transpose of TNF
- Transform of TNF
- Ordinary one-way ANOVA of Transform of TNF

Family

- TNF
  - Transpose
    - Transform of TNF
    - Ordinary one-way ANOVA
  - TNF

| Table format: |         | Group A    | Group B   | Group C    | Group D | Group E | Group F | Group G | Group H | Group I | Group J | Group K | Group L | Group M |
|---------------|---------|------------|-----------|------------|---------|---------|---------|---------|---------|---------|---------|---------|---------|---------|
| Grouped       |         | Donor 1    | Donor 2   | Donor 3    | Title   | Title   | Title   | Title   | Title   | Title   | Title   | Title   | Title   | Title   |
|               | Y       | Y          | Y         | Y          | Y       | Y       | Y       | Y       | Y       | Y       | Y       | Y       | Y       | Y       |
| 1             | Control | 1.000000   | 1.000000  | 1.000000   |         |         |         |         |         |         |         |         |         |         |
| 2             | Hyx     | 1.949600   | 3.797243  | 5.105093   |         |         |         |         |         |         |         |         |         |         |
| 3             | XO      | 80.839120  | 14.491010 | 69.353270  |         |         |         |         |         |         |         |         |         |         |
| 4             | XO+Hyx  | 471.302700 | 29.788120 | 226.316900 |         |         |         |         |         |         |         |         |         |         |
| 5             | Title   |            |           |            |         |         |         |         |         |         |         |         |         |         |
| 6             | Title   |            |           |            |         |         |         |         |         |         |         |         |         |         |
| 7             | Title   |            |           |            |         |         |         |         |         |         |         |         |         |         |
| 8             | Title   |            |           |            |         |         |         |         |         |         |         |         |         |         |
| 9             | Title   |            |           |            |         |         |         |         |         |         |         |         |         |         |
| 10            | Title   |            |           |            |         |         |         |         |         |         |         |         |         |         |
| 11            | Title   |            |           |            |         |         |         |         |         |         |         |         |         |         |
| 12            | Title   |            |           |            |         |         |         |         |         |         |         |         |         |         |
| 13            | Title   |            |           |            |         |         |         |         |         |         |         |         |         |         |
| 14            | Title   |            |           |            |         |         |         |         |         |         |         |         |         |         |
| 15            | Title   |            |           |            |         |         |         |         |         |         |         |         |         |         |
| 16            | Title   |            |           |            |         |         |         |         |         |         |         |         |         |         |
| 17            | Title   |            |           |            |         |         |         |         |         |         |         |         |         |         |
| 18            | Title   |            |           |            |         |         |         |         |         |         |         |         |         |         |
| 19            | Title   |            |           |            |         |         |         |         |         |         |         |         |         |         |
| 20            | Title   |            |           |            |         |         |         |         |         |         |         |         |         |         |
| 21            | Title   |            |           |            |         |         |         |         |         |         |         |         |         |         |
| 22            | Title   |            |           |            |         |         |         |         |         |         |         |         |         |         |
| 23            | Title   |            |           |            |         |         |         |         |         |         |         |         |         |         |
| 24            | Title   |            |           |            |         |         |         |         |         |         |         |         |         |         |
| 25            | Title   |            |           |            |         |         |         |         |         |         |         |         |         |         |
| 26            | Title   |            |           |            |         |         |         |         |         |         |         |         |         |         |
| 27            | Title   |            |           |            |         |         |         |         |         |         |         |         |         |         |
| 28            | Title   |            |           |            |         |         |         |         |         |         |         |         |         |         |

Row 1, Column RT

SourceDataforFigure2B — Edited

Prism 8

File Sheet Undo Clipboard Analysis Change Import Draw Write Text Export Print Send LA Help

Q Search

▼ Data Tables

- TNF
- TNF line
- IL-6
- IL-6 line
- IL-10
- IL-10 line
- IL-1beta
- IL-1beta line
- New Data Table...

▼ Info

- Project info 1
- Project info 1
- New Info...

▼ Results

- Transpose of TNF
- Transform of TNF
- Ordinary one-way ANOVA of Transform of TNF

Family

- TNF line
- TNF line

| Table format: |        | Group A    | Group B   | Group C    | Group D | Group E | Group F | Group G | Group H | Group I | Group J | Group K | Group L | Group M |
|---------------|--------|------------|-----------|------------|---------|---------|---------|---------|---------|---------|---------|---------|---------|---------|
| Grouped       |        | Donor 1    | Donor 2   | Donor 3    | Title   | Title   | Title   | Title   | Title   | Title   | Title   | Title   | Title   | Title   |
|               |        | Y          | Y         | Y          | Y       | Y       | Y       | Y       | Y       | Y       | Y       | Y       | Y       | Y       |
| 1             | XO     | 80.839120  | 14.491010 | 69.353270  |         |         |         |         |         |         |         |         |         |         |
| 2             | XO+Hyx | 471.302700 | 29.788120 | 226.316900 |         |         |         |         |         |         |         |         |         |         |
| 3             | Title  |            |           |            |         |         |         |         |         |         |         |         |         |         |
| 4             | Title  |            |           |            |         |         |         |         |         |         |         |         |         |         |
| 5             | Title  |            |           |            |         |         |         |         |         |         |         |         |         |         |
| 6             | Title  |            |           |            |         |         |         |         |         |         |         |         |         |         |
| 7             | Title  |            |           |            |         |         |         |         |         |         |         |         |         |         |
| 8             | Title  |            |           |            |         |         |         |         |         |         |         |         |         |         |
| 9             | Title  |            |           |            |         |         |         |         |         |         |         |         |         |         |
| 10            | Title  |            |           |            |         |         |         |         |         |         |         |         |         |         |
| 11            | Title  |            |           |            |         |         |         |         |         |         |         |         |         |         |
| 12            | Title  |            |           |            |         |         |         |         |         |         |         |         |         |         |
| 13            | Title  |            |           |            |         |         |         |         |         |         |         |         |         |         |
| 14            | Title  |            |           |            |         |         |         |         |         |         |         |         |         |         |
| 15            | Title  |            |           |            |         |         |         |         |         |         |         |         |         |         |
| 16            | Title  |            |           |            |         |         |         |         |         |         |         |         |         |         |
| 17            | Title  |            |           |            |         |         |         |         |         |         |         |         |         |         |
| 18            | Title  |            |           |            |         |         |         |         |         |         |         |         |         |         |
| 19            | Title  |            |           |            |         |         |         |         |         |         |         |         |         |         |
| 20            | Title  |            |           |            |         |         |         |         |         |         |         |         |         |         |
| 21            | Title  |            |           |            |         |         |         |         |         |         |         |         |         |         |
| 22            | Title  |            |           |            |         |         |         |         |         |         |         |         |         |         |
| 23            | Title  |            |           |            |         |         |         |         |         |         |         |         |         |         |
| 24            | Title  |            |           |            |         |         |         |         |         |         |         |         |         |         |
| 25            | Title  |            |           |            |         |         |         |         |         |         |         |         |         |         |
| 26            | Title  |            |           |            |         |         |         |         |         |         |         |         |         |         |
| 27            | Title  |            |           |            |         |         |         |         |         |         |         |         |         |         |
| 28            | Title  |            |           |            |         |         |         |         |         |         |         |         |         |         |

TNF line

Row 11, Column D

SourceDataforFigure2B — Edited

Prism 8

File Sheet Undo Clipboard Analysis Change Import Draw Write Text Export Print Send LA Help

Q Search

▼ Data Tables

- TNF
- TNF line
- IL-6**
- IL-6 line
- IL-10
- IL-10 line
- IL-1beta
- IL-1beta line
- New Data Table...

▼ Info

- Project info 1
- Project info 1
- New Info...

▼ Results

- Transpose of TNF
- Transform of TNF
- Ordinary one-way ANOVA of Transform of TNF

Family

- IL-6**
  - Transpose
    - Transform of IL-6
      - Ordinary one-way ANOVA
  - IL-6

| Table format: |         | Group A    | Group B    | Group C    | Group D | Group E | Group F | Group G | Group H | Group I | Group J | Group K | Group L | Group M |
|---------------|---------|------------|------------|------------|---------|---------|---------|---------|---------|---------|---------|---------|---------|---------|
| Grouped       |         | Donor 1    | Donor 2    | Donor 3    | Title   | Title   | Title   | Title   | Title   | Title   | Title   | Title   | Title   | Title   |
|               |         | Y          | Y          | Y          | Y       | Y       | Y       | Y       | Y       | Y       | Y       | Y       | Y       | Y       |
| 1             | Control | 1.000000   | 1.000000   | 1.000000   |         |         |         |         |         |         |         |         |         |         |
| 2             | Hyx     | 1.849232   | 1.268578   | 0.740864   |         |         |         |         |         |         |         |         |         |         |
| 3             | XO      | 58.953000  | 287.262700 | 60.880400  |         |         |         |         |         |         |         |         |         |         |
| 4             | XO+Hyx  | 439.624900 | 542.791700 | 209.010000 |         |         |         |         |         |         |         |         |         |         |
| 5             | Title   |            |            |            |         |         |         |         |         |         |         |         |         |         |
| 6             | Title   |            |            |            |         |         |         |         |         |         |         |         |         |         |
| 7             | Title   |            |            |            |         |         |         |         |         |         |         |         |         |         |
| 8             | Title   |            |            |            |         |         |         |         |         |         |         |         |         |         |
| 9             | Title   |            |            |            |         |         |         |         |         |         |         |         |         |         |
| 10            | Title   |            |            |            |         |         |         |         |         |         |         |         |         |         |
| 11            | Title   |            |            |            |         |         |         |         |         |         |         |         |         |         |
| 12            | Title   |            |            |            |         |         |         |         |         |         |         |         |         |         |
| 13            | Title   |            |            |            |         |         |         |         |         |         |         |         |         |         |
| 14            | Title   |            |            |            |         |         |         |         |         |         |         |         |         |         |
| 15            | Title   |            |            |            |         |         |         |         |         |         |         |         |         |         |
| 16            | Title   |            |            |            |         |         |         |         |         |         |         |         |         |         |
| 17            | Title   |            |            |            |         |         |         |         |         |         |         |         |         |         |
| 18            | Title   |            |            |            |         |         |         |         |         |         |         |         |         |         |
| 19            | Title   |            |            |            |         |         |         |         |         |         |         |         |         |         |
| 20            | Title   |            |            |            |         |         |         |         |         |         |         |         |         |         |
| 21            | Title   |            |            |            |         |         |         |         |         |         |         |         |         |         |
| 22            | Title   |            |            |            |         |         |         |         |         |         |         |         |         |         |
| 23            | Title   |            |            |            |         |         |         |         |         |         |         |         |         |         |
| 24            | Title   |            |            |            |         |         |         |         |         |         |         |         |         |         |
| 25            | Title   |            |            |            |         |         |         |         |         |         |         |         |         |         |
| 26            | Title   |            |            |            |         |         |         |         |         |         |         |         |         |         |
| 27            | Title   |            |            |            |         |         |         |         |         |         |         |         |         |         |
| 28            | Title   |            |            |            |         |         |         |         |         |         |         |         |         |         |

SourceDataforFigure2B — Edited

File Sheet Undo Clipboard Analysis Change Import Draw Write Text Export Print Send LA Help

Prism 8

Q Search

▼ Data Tables

- TNF
- TNF line
- IL-6
- IL-6 line**
- IL-10
- IL-10 line
- IL-1beta
- IL-1beta line
- New Data Table...

▼ Info

- Project info 1
- Project info 1
- New Info...

▼ Results

- Transpose of TNF
- Transform of TNF
- Ordinary one-way ANOVA of Transform of TNF

Family

- IL-6 line**
- IL-6 line

| Table format: |        | Group A    | Group B    | Group C    | Group D | Group E | Group F | Group G | Group H | Group I | Group J | Group K | Group L |
|---------------|--------|------------|------------|------------|---------|---------|---------|---------|---------|---------|---------|---------|---------|
| Grouped       |        | Donor 1    | Donor 2    | Donor 3    | Title   | Title   | Title   | Title   | Title   | Title   | Title   | Title   | Title   |
|               |        | Y          | Y          | Y          | Y       | Y       | Y       | Y       | Y       | Y       | Y       | Y       | Y       |
| 1             | XO     | 58.953000  | 287.262700 | 60.880400  |         |         |         |         |         |         |         |         |         |
| 2             | XO+Hyx | 439.624900 | 542.791700 | 209.010000 |         |         |         |         |         |         |         |         |         |
| 3             | Title  |            |            |            |         |         |         |         |         |         |         |         |         |
| 4             | Title  |            |            |            |         |         |         |         |         |         |         |         |         |
| 5             | Title  |            |            |            |         |         |         |         |         |         |         |         |         |
| 6             | Title  |            |            |            |         |         |         |         |         |         |         |         |         |
| 7             | Title  |            |            |            |         |         |         |         |         |         |         |         |         |
| 8             | Title  |            |            |            |         |         |         |         |         |         |         |         |         |
| 9             | Title  |            |            |            |         |         |         |         |         |         |         |         |         |
| 10            | Title  |            |            |            |         |         |         |         |         |         |         |         |         |
| 11            | Title  |            |            |            |         |         |         |         |         |         |         |         |         |
| 12            | Title  |            |            |            |         |         |         |         |         |         |         |         |         |
| 13            | Title  |            |            |            |         |         |         |         |         |         |         |         |         |
| 14            | Title  |            |            |            |         |         |         |         |         |         |         |         |         |
| 15            | Title  |            |            |            |         |         |         |         |         |         |         |         |         |
| 16            | Title  |            |            |            |         |         |         |         |         |         |         |         |         |
| 17            | Title  |            |            |            |         |         |         |         |         |         |         |         |         |
| 18            | Title  |            |            |            |         |         |         |         |         |         |         |         |         |
| 19            | Title  |            |            |            |         |         |         |         |         |         |         |         |         |
| 20            | Title  |            |            |            |         |         |         |         |         |         |         |         |         |
| 21            | Title  |            |            |            |         |         |         |         |         |         |         |         |         |
| 22            | Title  |            |            |            |         |         |         |         |         |         |         |         |         |
| 23            | Title  |            |            |            |         |         |         |         |         |         |         |         |         |
| 24            | Title  |            |            |            |         |         |         |         |         |         |         |         |         |
| 25            | Title  |            |            |            |         |         |         |         |         |         |         |         |         |
| 26            | Title  |            |            |            |         |         |         |         |         |         |         |         |         |
| 27            | Title  |            |            |            |         |         |         |         |         |         |         |         |         |
| 28            | Title  |            |            |            |         |         |         |         |         |         |         |         |         |

IL-6 line

Row 5, C: Donor 3



SourceDataforFigure2B — Edited

Prism 8

File Sheet Undo Clipboard Analysis Change Import Draw Write Text Export Print Send LA Help

Q Search

▼ Data Tables

- TNF
- TNF line
- IL-6
- IL-6 line
- IL-10**
- IL-10 line
- IL-1beta
- IL-1beta line
- New Data Table...

▼ Info

- Project info 1
- Project info 1
- New Info...

▼ Results

- Transpose of TNF
- Transform of TNF
- Ordinary one-way ANOVA of Transform of TNF

Family

- IL-10**
  - Transpose
    - Transform of IL-10
      - Ordinary one-way ANOVA
  - IL-10

| Table format: |         | Group A   | Group B   | Group C  | Group D | Group E | Group F | Group G | Group H | Group I | Group J | Group K | Group L | Group M |
|---------------|---------|-----------|-----------|----------|---------|---------|---------|---------|---------|---------|---------|---------|---------|---------|
| Grouped       |         | Donor 1   | Donor 2   | Donor 3  | Title   | Title   | Title   | Title   | Title   | Title   | Title   | Title   | Title   | Title   |
|               |         | Y         | Y         | Y        | Y       | Y       | Y       | Y       | Y       | Y       | Y       | Y       | Y       | Y       |
| 1             | Control | 1.000000  | 1.000000  | 1.000000 |         |         |         |         |         |         |         |         |         |         |
| 2             | Hyx     | 1.000000  | 1.000000  | 1.246753 |         |         |         |         |         |         |         |         |         |         |
| 3             | XO      | 13.963560 | 5.479058  | 3.954546 |         |         |         |         |         |         |         |         |         |         |
| 4             | XO+Hyx  | 5.927126  | 41.633510 | 2.454546 |         |         |         |         |         |         |         |         |         |         |
| 5             | Title   |           |           |          |         |         |         |         |         |         |         |         |         |         |
| 6             | Title   |           |           |          |         |         |         |         |         |         |         |         |         |         |
| 7             | Title   |           |           |          |         |         |         |         |         |         |         |         |         |         |
| 8             | Title   |           |           |          |         |         |         |         |         |         |         |         |         |         |
| 9             | Title   |           |           |          |         |         |         |         |         |         |         |         |         |         |
| 10            | Title   |           |           |          |         |         |         |         |         |         |         |         |         |         |
| 11            | Title   |           |           |          |         |         |         |         |         |         |         |         |         |         |
| 12            | Title   |           |           |          |         |         |         |         |         |         |         |         |         |         |
| 13            | Title   |           |           |          |         |         |         |         |         |         |         |         |         |         |
| 14            | Title   |           |           |          |         |         |         |         |         |         |         |         |         |         |
| 15            | Title   |           |           |          |         |         |         |         |         |         |         |         |         |         |
| 16            | Title   |           |           |          |         |         |         |         |         |         |         |         |         |         |
| 17            | Title   |           |           |          |         |         |         |         |         |         |         |         |         |         |
| 18            | Title   |           |           |          |         |         |         |         |         |         |         |         |         |         |
| 19            | Title   |           |           |          |         |         |         |         |         |         |         |         |         |         |
| 20            | Title   |           |           |          |         |         |         |         |         |         |         |         |         |         |
| 21            | Title   |           |           |          |         |         |         |         |         |         |         |         |         |         |
| 22            | Title   |           |           |          |         |         |         |         |         |         |         |         |         |         |
| 23            | Title   |           |           |          |         |         |         |         |         |         |         |         |         |         |
| 24            | Title   |           |           |          |         |         |         |         |         |         |         |         |         |         |
| 25            | Title   |           |           |          |         |         |         |         |         |         |         |         |         |         |
| 26            | Title   |           |           |          |         |         |         |         |         |         |         |         |         |         |
| 27            | Title   |           |           |          |         |         |         |         |         |         |         |         |         |         |
| 28            | Title   |           |           |          |         |         |         |         |         |         |         |         |         |         |

IL-10

Row 1, Column RT

SourceDataforFigure2B — Edited

Prism 8

File Sheet Undo Clipboard Analysis Change Import Draw Write Text Export Print Send LA Help

Q Search

▼ Data Tables

- TNF
- TNF line
- IL-6
- IL-6 line
- IL-10
- IL-10 line**
- IL-1beta
- IL-1beta line
- New Data Table...

▼ Info

- Project info 1
- Project info 1
- New Info...

▼ Results

- Transpose of TNF
- Transform of TNF
- Ordinary one-way ANOVA of Transform of TNF

Family

- IL-10 line**
- IL-10 line

| Table format: |        | Group A   | Group B   | Group C  | Group D | Group E | Group F | Group G | Group H | Group I | Group J | Group K | Group L |
|---------------|--------|-----------|-----------|----------|---------|---------|---------|---------|---------|---------|---------|---------|---------|
| Grouped       |        | Donor 1   | Donor 2   | Donor 3  | Title   | Title   | Title   | Title   | Title   | Title   | Title   | Title   | Title   |
|               |        | Y         | Y         | Y        | Y       | Y       | Y       | Y       | Y       | Y       | Y       | Y       | Y       |
| 1             | XO     | 13.963560 | 5.479058  | 3.954546 |         |         |         |         |         |         |         |         |         |
| 2             | XO+Hyx | 5.927126  | 41.633510 | 2.454546 |         |         |         |         |         |         |         |         |         |
| 3             | Title  |           |           |          |         |         |         |         |         |         |         |         |         |
| 4             | Title  |           |           |          |         |         |         |         |         |         |         |         |         |
| 5             | Title  |           |           |          |         |         |         |         |         |         |         |         |         |
| 6             | Title  |           |           |          |         |         |         |         |         |         |         |         |         |
| 7             | Title  |           |           |          |         |         |         |         |         |         |         |         |         |
| 8             | Title  |           |           |          |         |         |         |         |         |         |         |         |         |
| 9             | Title  |           |           |          |         |         |         |         |         |         |         |         |         |
| 10            | Title  |           |           |          |         |         |         |         |         |         |         |         |         |
| 11            | Title  |           |           |          |         |         |         |         |         |         |         |         |         |
| 12            | Title  |           |           |          |         |         |         |         |         |         |         |         |         |
| 13            | Title  |           |           |          |         |         |         |         |         |         |         |         |         |
| 14            | Title  |           |           |          |         |         |         |         |         |         |         |         |         |
| 15            | Title  |           |           |          |         |         |         |         |         |         |         |         |         |
| 16            | Title  |           |           |          |         |         |         |         |         |         |         |         |         |
| 17            | Title  |           |           |          |         |         |         |         |         |         |         |         |         |
| 18            | Title  |           |           |          |         |         |         |         |         |         |         |         |         |
| 19            | Title  |           |           |          |         |         |         |         |         |         |         |         |         |
| 20            | Title  |           |           |          |         |         |         |         |         |         |         |         |         |
| 21            | Title  |           |           |          |         |         |         |         |         |         |         |         |         |
| 22            | Title  |           |           |          |         |         |         |         |         |         |         |         |         |
| 23            | Title  |           |           |          |         |         |         |         |         |         |         |         |         |
| 24            | Title  |           |           |          |         |         |         |         |         |         |         |         |         |
| 25            | Title  |           |           |          |         |         |         |         |         |         |         |         |         |
| 26            | Title  |           |           |          |         |         |         |         |         |         |         |         |         |
| 27            | Title  |           |           |          |         |         |         |         |         |         |         |         |         |
| 28            | Title  |           |           |          |         |         |         |         |         |         |         |         |         |

IL-10 line

Row 8, A: Donor 1

SourceDataforFigure2B — Edited

Prism 8

File Sheet Undo Clipboard Analysis Change Import Draw Write Text Export Print Send LA Help

Q Search

▼ Data Tables

- TNF
- TNF line
- IL-6
- IL-6 line
- IL-10
- IL-10 line
- IL-1beta**
- IL-1beta line
- New Data Table...

▼ Info

- Project info 1
- Project info 1
- New Info...

▼ Results

- Transpose of TNF
- Transform of TNF
- Ordinary one-way ANOVA of Transform of TNF

Family

- IL-1beta**
  - Transpose
    - Transform IL-1beta
    - Ordinary one-way ANOVA
  - IL-1beta

| Table format: |         | Group A    | Group B   | Group C   | Group D | Group E | Group F | Group G | Group H | Group I | Group J | Group K | Group L | Group M |
|---------------|---------|------------|-----------|-----------|---------|---------|---------|---------|---------|---------|---------|---------|---------|---------|
| Grouped       |         | Donor 1    | Donor 2   | Donor 3   | Title   | Title   | Title   | Title   | Title   | Title   | Title   | Title   | Title   | Title   |
|               |         | Y          | Y         | Y         | Y       | Y       | Y       | Y       | Y       | Y       | Y       | Y       | Y       | Y       |
| 1             | Control | 1.000000   | 1.000000  | 1.000000  |         |         |         |         |         |         |         |         |         |         |
| 2             | Hyx     | 1.000000   | 1.111502  | 1.000000  |         |         |         |         |         |         |         |         |         |         |
| 3             | XO      | 38.450000  | 7.575117  | 1.000000  |         |         |         |         |         |         |         |         |         |         |
| 4             | XO+Hyx  | 323.750000 | 59.553980 | 14.040000 |         |         |         |         |         |         |         |         |         |         |
| 5             | Title   |            |           |           |         |         |         |         |         |         |         |         |         |         |
| 6             | Title   |            |           |           |         |         |         |         |         |         |         |         |         |         |
| 7             | Title   |            |           |           |         |         |         |         |         |         |         |         |         |         |
| 8             | Title   |            |           |           |         |         |         |         |         |         |         |         |         |         |
| 9             | Title   |            |           |           |         |         |         |         |         |         |         |         |         |         |
| 10            | Title   |            |           |           |         |         |         |         |         |         |         |         |         |         |
| 11            | Title   |            |           |           |         |         |         |         |         |         |         |         |         |         |
| 12            | Title   |            |           |           |         |         |         |         |         |         |         |         |         |         |
| 13            | Title   |            |           |           |         |         |         |         |         |         |         |         |         |         |
| 14            | Title   |            |           |           |         |         |         |         |         |         |         |         |         |         |
| 15            | Title   |            |           |           |         |         |         |         |         |         |         |         |         |         |
| 16            | Title   |            |           |           |         |         |         |         |         |         |         |         |         |         |
| 17            | Title   |            |           |           |         |         |         |         |         |         |         |         |         |         |
| 18            | Title   |            |           |           |         |         |         |         |         |         |         |         |         |         |
| 19            | Title   |            |           |           |         |         |         |         |         |         |         |         |         |         |
| 20            | Title   |            |           |           |         |         |         |         |         |         |         |         |         |         |
| 21            | Title   |            |           |           |         |         |         |         |         |         |         |         |         |         |
| 22            | Title   |            |           |           |         |         |         |         |         |         |         |         |         |         |
| 23            | Title   |            |           |           |         |         |         |         |         |         |         |         |         |         |
| 24            | Title   |            |           |           |         |         |         |         |         |         |         |         |         |         |
| 25            | Title   |            |           |           |         |         |         |         |         |         |         |         |         |         |
| 26            | Title   |            |           |           |         |         |         |         |         |         |         |         |         |         |
| 27            | Title   |            |           |           |         |         |         |         |         |         |         |         |         |         |
| 28            | Title   |            |           |           |         |         |         |         |         |         |         |         |         |         |

IL-1beta

Row 1, Column RT

SourceDataforFigure2B — Edited

Prism 8

File Sheet Undo Clipboard Analysis Change Import Draw Write Text Export Print Send LA Help

Q Search

▼ Data Tables

- TNF
- TNF line
- IL-6
- IL-6 line
- IL-10
- IL-10 line
- IL-1beta
- IL-1beta line**
- + New Data Table...

▼ Info

- Project info 1
- Project info 1
- + New Info...

▼ Results

- Transpose of TNF
- Transform of TNF
- Ordinary one-way ANOVA of Transform of TNF

Family

- IL-1beta line**
- IL-1beta line

| Table format: |        | Group A    | Group B   | Group C   | Group D | Group E | Group F | Group G | Group H | Group I | Group J | Group K | Group L |
|---------------|--------|------------|-----------|-----------|---------|---------|---------|---------|---------|---------|---------|---------|---------|
| Grouped       |        | Donor 1    | Donor 2   | Donor 3   | Title   | Title   | Title   | Title   | Title   | Title   | Title   | Title   | Title   |
|               |        | Y          | Y         | Y         | Y       | Y       | Y       | Y       | Y       | Y       | Y       | Y       | Y       |
| 1             | XO     | 38.450000  | 7.575117  | 1.000000  |         |         |         |         |         |         |         |         |         |
| 2             | XO+Hyx | 323.750000 | 59.553980 | 14.040000 |         |         |         |         |         |         |         |         |         |
| 3             | Title  |            |           |           |         |         |         |         |         |         |         |         |         |
| 4             | Title  |            |           |           |         |         |         |         |         |         |         |         |         |
| 5             | Title  |            |           |           |         |         |         |         |         |         |         |         |         |
| 6             | Title  |            |           |           |         |         |         |         |         |         |         |         |         |
| 7             | Title  |            |           |           |         |         |         |         |         |         |         |         |         |
| 8             | Title  |            |           |           |         |         |         |         |         |         |         |         |         |
| 9             | Title  |            |           |           |         |         |         |         |         |         |         |         |         |
| 10            | Title  |            |           |           |         |         |         |         |         |         |         |         |         |
| 11            | Title  |            |           |           |         |         |         |         |         |         |         |         |         |
| 12            | Title  |            |           |           |         |         |         |         |         |         |         |         |         |
| 13            | Title  |            |           |           |         |         |         |         |         |         |         |         |         |
| 14            | Title  |            |           |           |         |         |         |         |         |         |         |         |         |
| 15            | Title  |            |           |           |         |         |         |         |         |         |         |         |         |
| 16            | Title  |            |           |           |         |         |         |         |         |         |         |         |         |
| 17            | Title  |            |           |           |         |         |         |         |         |         |         |         |         |
| 18            | Title  |            |           |           |         |         |         |         |         |         |         |         |         |
| 19            | Title  |            |           |           |         |         |         |         |         |         |         |         |         |
| 20            | Title  |            |           |           |         |         |         |         |         |         |         |         |         |
| 21            | Title  |            |           |           |         |         |         |         |         |         |         |         |         |
| 22            | Title  |            |           |           |         |         |         |         |         |         |         |         |         |
| 23            | Title  |            |           |           |         |         |         |         |         |         |         |         |         |
| 24            | Title  |            |           |           |         |         |         |         |         |         |         |         |         |
| 25            | Title  |            |           |           |         |         |         |         |         |         |         |         |         |
| 26            | Title  |            |           |           |         |         |         |         |         |         |         |         |         |
| 27            | Title  |            |           |           |         |         |         |         |         |         |         |         |         |
| 28            | Title  |            |           |           |         |         |         |         |         |         |         |         |         |

IL-1beta line

Row 5, B: Donor 2

SourceDataforFigure2B — Edited

Prism 8

File Sheet Undo Clipboard Analysis Interpret Change Draw Write Text Export Print Send LA Help

Q Search

▼ Info Project Info 1

⊕ New Info...

▼ Results

- Transpose of TNF
- Transform of TNF
- Ordinary one-way ANOVA of Transform of TNF
- Transpose of IL-6
- Transform of IL-6
- Ordinary one-way ANOVA of Transform of IL-6
- Transpose of IL-10
- Transform of IL-10
- Ordinary one-way ANOVA of Transform of IL-10
- Transpose of IL-1beta
- Transform IL-1beta
- Ordinary one-way ANOVA of Transform IL-1beta
- New Analysis...

▼ Graphs

- TNF

Family

- TNF
  - Transpose
  - Transform of TNF
  - Ordinary one-way ANOVA

|    |           | A       | B     | C      | D       | E     | F     | G     | H     | I     | J     | K     | L     | M     |
|----|-----------|---------|-------|--------|---------|-------|-------|-------|-------|-------|-------|-------|-------|-------|
|    | Transpose | Control | Hyx   | XO     | XO+Hyx  | Title | Title | Title | Title | Title | Title | Title | Title | Title |
|    |           | Y       | Y     | Y      | Y       | Y     | Y     | Y     | Y     | Y     | Y     | Y     | Y     | Y     |
| 1  | Donor 1   | 1.000   | 1.950 | 80.839 | 471.303 |       |       |       |       |       |       |       |       |       |
| 2  | Donor 2   | 1.000   | 3.797 | 14.491 | 29.788  |       |       |       |       |       |       |       |       |       |
| 3  | Donor 3   | 1.000   | 5.105 | 69.353 | 226.317 |       |       |       |       |       |       |       |       |       |
| 4  |           |         |       |        |         |       |       |       |       |       |       |       |       |       |
| 5  |           |         |       |        |         |       |       |       |       |       |       |       |       |       |
| 6  |           |         |       |        |         |       |       |       |       |       |       |       |       |       |
| 7  |           |         |       |        |         |       |       |       |       |       |       |       |       |       |
| 8  |           |         |       |        |         |       |       |       |       |       |       |       |       |       |
| 9  |           |         |       |        |         |       |       |       |       |       |       |       |       |       |
| 10 |           |         |       |        |         |       |       |       |       |       |       |       |       |       |
| 11 |           |         |       |        |         |       |       |       |       |       |       |       |       |       |
| 12 |           |         |       |        |         |       |       |       |       |       |       |       |       |       |
| 13 |           |         |       |        |         |       |       |       |       |       |       |       |       |       |
| 14 |           |         |       |        |         |       |       |       |       |       |       |       |       |       |
| 15 |           |         |       |        |         |       |       |       |       |       |       |       |       |       |
| 16 |           |         |       |        |         |       |       |       |       |       |       |       |       |       |
| 17 |           |         |       |        |         |       |       |       |       |       |       |       |       |       |
| 18 |           |         |       |        |         |       |       |       |       |       |       |       |       |       |
| 19 |           |         |       |        |         |       |       |       |       |       |       |       |       |       |
| 20 |           |         |       |        |         |       |       |       |       |       |       |       |       |       |
| 21 |           |         |       |        |         |       |       |       |       |       |       |       |       |       |
| 22 |           |         |       |        |         |       |       |       |       |       |       |       |       |       |
| 23 |           |         |       |        |         |       |       |       |       |       |       |       |       |       |
| 24 |           |         |       |        |         |       |       |       |       |       |       |       |       |       |
| 25 |           |         |       |        |         |       |       |       |       |       |       |       |       |       |
| 26 |           |         |       |        |         |       |       |       |       |       |       |       |       |       |
| 27 |           |         |       |        |         |       |       |       |       |       |       |       |       |       |
| 28 |           |         |       |        |         |       |       |       |       |       |       |       |       |       |

Transpose of TNF

Row 7, C: XO

SourceDataforFigure2B — Edited

Prism 8

File Sheet Undo Clipboard Analysis Interpret Change Draw Write Text Export Print Send LA Help

Q Search

▼ Info Project Info 1

⊕ New Info...

▼ Results

- ▢ Transpose of TNF
- ▢ Transform of TNF
- ▢ Ordinary one-way ANOVA of Transform of TNF
- ▢ Transpose of IL-6
- ▢ Transform of IL-6
- ▢ Ordinary one-way ANOVA of Transform of IL-6
- ▢ Transpose of IL-10
- ▢ Transform of IL-10
- ▢ Ordinary one-way ANOVA of Transform of IL-10
- ▢ Transpose of IL-1beta
- ▢ Transform IL-1beta
- ▢ Ordinary one-way ANOVA of Transform IL-1beta

⊕ New Analysis...

▼ Graphs

- ▢ TNF

Family

- ▢ TNF
  - ▢ Transpose
  - ▢ Transform of TNF
  - ▢ Ordinary one-way ANOVA

|    |           | A       | B     | C     | D      | E     | F     | G     | H     | I     | J     | K     | L     |
|----|-----------|---------|-------|-------|--------|-------|-------|-------|-------|-------|-------|-------|-------|
|    | Transform | Control | Hyx   | XO    | XO+Hyx | Title | Title | Title | Title | Title | Title | Title | Title |
|    |           | Y       | Y     | Y     | Y      | Y     | Y     | Y     | Y     | Y     | Y     | Y     | Y     |
| 1  | Donor 1   | 0.000   | 0.290 | 1.908 | 2.673  |       |       |       |       |       |       |       |       |
| 2  | Donor 2   | 0.000   | 0.579 | 1.161 | 1.474  |       |       |       |       |       |       |       |       |
| 3  | Donor 3   | 0.000   | 0.708 | 1.841 | 2.355  |       |       |       |       |       |       |       |       |
| 4  |           |         |       |       |        |       |       |       |       |       |       |       |       |
| 5  |           |         |       |       |        |       |       |       |       |       |       |       |       |
| 6  |           |         |       |       |        |       |       |       |       |       |       |       |       |
| 7  |           |         |       |       |        |       |       |       |       |       |       |       |       |
| 8  |           |         |       |       |        |       |       |       |       |       |       |       |       |
| 9  |           |         |       |       |        |       |       |       |       |       |       |       |       |
| 10 |           |         |       |       |        |       |       |       |       |       |       |       |       |
| 11 |           |         |       |       |        |       |       |       |       |       |       |       |       |
| 12 |           |         |       |       |        |       |       |       |       |       |       |       |       |
| 13 |           |         |       |       |        |       |       |       |       |       |       |       |       |
| 14 |           |         |       |       |        |       |       |       |       |       |       |       |       |
| 15 |           |         |       |       |        |       |       |       |       |       |       |       |       |
| 16 |           |         |       |       |        |       |       |       |       |       |       |       |       |
| 17 |           |         |       |       |        |       |       |       |       |       |       |       |       |
| 18 |           |         |       |       |        |       |       |       |       |       |       |       |       |
| 19 |           |         |       |       |        |       |       |       |       |       |       |       |       |
| 20 |           |         |       |       |        |       |       |       |       |       |       |       |       |
| 21 |           |         |       |       |        |       |       |       |       |       |       |       |       |
| 22 |           |         |       |       |        |       |       |       |       |       |       |       |       |
| 23 |           |         |       |       |        |       |       |       |       |       |       |       |       |
| 24 |           |         |       |       |        |       |       |       |       |       |       |       |       |
| 25 |           |         |       |       |        |       |       |       |       |       |       |       |       |
| 26 |           |         |       |       |        |       |       |       |       |       |       |       |       |
| 27 |           |         |       |       |        |       |       |       |       |       |       |       |       |
| 28 |           |         |       |       |        |       |       |       |       |       |       |       |       |

Transform of TNF Row 11, C: XO

SourceDataforFigure2B — Edited

Prism 8

File Sheet Undo Clipboard Analysis Interpret Change Draw Write Text Export Print Send LA Help

Q Search ANOVA results Multiple comparisons

▼ Info Project Info 1

⊕ New Info...

▼ Results

- Transpose of TNF
- Transform of TNF
- Ordinary one-way ANOVA of Transform of TNF**
- Transpose of IL-6
- Transform of IL-6
- Ordinary one-way ANOVA of Transform of IL-6
- Transpose of IL-10
- Transform of IL-10
- Ordinary one-way ANOVA of Transform of IL-10
- Transpose of IL-1beta
- Transform IL-1beta
- Ordinary one-way ANOVA of Transform IL-1beta
- ⊕ New Analysis...

▼ Graphs

- TNF

Family

- TNF
  - Transpose
    - Transform of TNF
    - Ordinary one-way ANOVA**

| Ordinary one-way ANOVA |                                             | ANOVA results    |           |           |                     |                |
|------------------------|---------------------------------------------|------------------|-----------|-----------|---------------------|----------------|
| 1                      | Table Analyzed                              | Transform of TNF |           |           |                     |                |
| 2                      | Data sets analyzed                          | A-D              |           |           |                     |                |
| 3                      |                                             |                  |           |           |                     |                |
| 4                      | <b>ANOVA summary</b>                        |                  |           |           |                     |                |
| 5                      | F                                           | 19.69            |           |           |                     |                |
| 6                      | P value                                     | 0.0005           |           |           |                     |                |
| 7                      | P value summary                             | ***              |           |           |                     |                |
| 8                      | Significant diff. among means (P < 0.05)?   | Yes              |           |           |                     |                |
| 9                      | R square                                    | 0.8807           |           |           |                     |                |
| 10                     |                                             |                  |           |           |                     |                |
| 11                     | <b>Brown-Forsythe test</b>                  |                  |           |           |                     |                |
| 12                     | F (DFn, DFd)                                | 0.9537 (3, 8)    |           |           |                     |                |
| 13                     | P value                                     | 0.4597           |           |           |                     |                |
| 14                     | P value summary                             | ns               |           |           |                     |                |
| 15                     | Are SDs significantly different (P < 0.05)? | No               |           |           |                     |                |
| 16                     |                                             |                  |           |           |                     |                |
| 17                     | <b>Bartlett's test</b>                      |                  |           |           |                     |                |
| 18                     | Bartlett's statistic (corrected)            |                  |           |           |                     |                |
| 19                     | P value                                     |                  |           |           |                     |                |
| 20                     | P value summary                             |                  |           |           |                     |                |
| 21                     | Are SDs significantly different (P < 0.05)? |                  |           |           |                     |                |
| 22                     |                                             |                  |           |           |                     |                |
| 23                     | <b>ANOVA table</b>                          | <b>SS</b>        | <b>DF</b> | <b>MS</b> | <b>F (DFn, DFd)</b> | <b>P value</b> |
| 24                     | Treatment (between columns)                 | 8.897            | 3         | 2.966     | F (3, 8) = 19.69    | P=0.0005       |
| 25                     | Residual (within columns)                   | 1.205            | 8         | 0.1506    |                     |                |
| 26                     | Total                                       | 10.10            | 11        |           |                     |                |
| 27                     |                                             |                  |           |           |                     |                |

Ordinary one-way ANOVA of Transform of TNF Row 1, Column A

SourceDataforFigure2B — Edited

Prism 8

File Sheet Undo Clipboard Analysis Interpret Change Draw Write Text Export Print Send LA Help

Q Search ANOVA results Multiple comparisons

▼ Info Project Info 1

⊕ New Info...

▼ Results

- Transpose of TNF
- Transform of TNF
- Ordinary one-way ANOVA of Transform of TNF**
- Transpose of IL-6
- Transform of IL-6
- Ordinary one-way ANOVA of Transform of IL-6
- Transpose of IL-10
- Transform of IL-10
- Ordinary one-way ANOVA of Transform of IL-10
- Transpose of IL-1beta
- Transform IL-1beta
- Ordinary one-way ANOVA of Transform IL-1beta

⊕ New Analysis...

▼ Graphs

- TNF

Family

- TNF
  - Transpose
  - Transform of TNF
  - Ordinary one-way ANOVA**

| Ordinary one-way ANOVA |                                  |                   |                           |                     |                    |                         |           |          |           |
|------------------------|----------------------------------|-------------------|---------------------------|---------------------|--------------------|-------------------------|-----------|----------|-----------|
| Multiple comparisons   |                                  |                   |                           |                     |                    |                         |           |          |           |
| 1                      | Number of families               | 1                 |                           |                     |                    |                         |           |          |           |
| 2                      | Number of comparisons per        | 6                 |                           |                     |                    |                         |           |          |           |
| 3                      | Alpha                            | 0.05              |                           |                     |                    |                         |           |          |           |
| 4                      |                                  |                   |                           |                     |                    |                         |           |          |           |
| 5                      | <b>Tukey's multiple comparis</b> | <b>Mean Diff.</b> | <b>95.00% CI of diff.</b> | <b>Significant?</b> | <b>Summary</b>     | <b>Adjusted P Value</b> |           |          |           |
| 6                      | Control vs. Hyx                  | -0.5258           | -1.541 to 0.4889          | No                  | ns                 | 0.4017                  |           | A-B      |           |
| 7                      | Control vs. XO                   | -1.637            | -2.651 to -0.6219         | Yes                 | **                 | 0.0038                  |           | A-C      |           |
| 8                      | Control vs. XO+Hyx               | -2.167            | -3.182 to -1.153          | Yes                 | ***                | 0.0006                  |           | A-D      |           |
| 9                      | Hyx vs. XO                       | -1.111            | -2.125 to -0.09608        | Yes                 | *                  | 0.0327                  |           | B-C      |           |
| 10                     | Hyx vs. XO+Hyx                   | -1.642            | -2.656 to -0.6268         | Yes                 | **                 | 0.0037                  |           | B-D      |           |
| 11                     | XO vs. XO+Hyx                    | -0.5308           | -1.545 to 0.4840          | No                  | ns                 | 0.3944                  |           | C-D      |           |
| 12                     |                                  |                   |                           |                     |                    |                         |           |          |           |
| 13                     | <b>Test details</b>              | <b>Mean 1</b>     | <b>Mean 2</b>             | <b>Mean Diff.</b>   | <b>SE of diff.</b> | <b>n1</b>               | <b>n2</b> | <b>q</b> | <b>DF</b> |
| 14                     | Control vs. Hyx                  | 0.000             | 0.5258                    | -0.5258             | 0.3169             | 3                       | 3         | 2.347    | 8         |
| 15                     | Control vs. XO                   | 0.000             | 1.637                     | -1.637              | 0.3169             | 3                       | 3         | 7.304    | 8         |
| 16                     | Control vs. XO+Hyx               | 0.000             | 2.167                     | -2.167              | 0.3169             | 3                       | 3         | 9.673    | 8         |
| 17                     | Hyx vs. XO                       | 0.5258            | 1.637                     | -1.111              | 0.3169             | 3                       | 3         | 4.958    | 8         |
| 18                     | Hyx vs. XO+Hyx                   | 0.5258            | 2.167                     | -1.642              | 0.3169             | 3                       | 3         | 7.326    | 8         |
| 19                     | XO vs. XO+Hyx                    | 1.637             | 2.167                     | -0.5308             | 0.3169             | 3                       | 3         | 2.369    | 8         |
| 20                     |                                  |                   |                           |                     |                    |                         |           |          |           |
| 21                     |                                  |                   |                           |                     |                    |                         |           |          |           |
| 22                     |                                  |                   |                           |                     |                    |                         |           |          |           |
| 23                     |                                  |                   |                           |                     |                    |                         |           |          |           |
| 24                     |                                  |                   |                           |                     |                    |                         |           |          |           |
| 25                     |                                  |                   |                           |                     |                    |                         |           |          |           |
| 26                     |                                  |                   |                           |                     |                    |                         |           |          |           |
| 27                     |                                  |                   |                           |                     |                    |                         |           |          |           |

Ordinary one-way ANOVA of Transform of TNF Row 1, Column A



SourceDataforFigure2B — Edited

Prism 8

File Sheet Undo Clipboard Analysis Interpret Change Draw Write Text Export Print Send LA Help

Q Search

▼ Info Project Info 1

⊕ New Info...

▼ Results

- Transform of TNF
- Transform of TNF
- Ordinary one-way ANOVA of Transform of TNF
- Transpose of IL-6**
- Transform of IL-6
- Ordinary one-way ANOVA of Transform of IL-6
- Transform of IL-10
- Transform of IL-10
- Ordinary one-way ANOVA of Transform of IL-10
- Transpose of IL-1beta
- Transform IL-1beta
- Ordinary one-way ANOVA of Transform IL-1beta
- New Analysis...

▼ Graphs

- TNF

Family

- IL-6
  - Transpose**
    - Transform of IL-6
    - Ordinary one-way ANOVA

| Transpose |         | A       | B     | C       | D       | E     | F     | G     | H     | I     | J     | K     | L     |
|-----------|---------|---------|-------|---------|---------|-------|-------|-------|-------|-------|-------|-------|-------|
|           |         | Control | Hyx   | XO      | XO+Hyx  | Title | Title | Title | Title | Title | Title | Title | Title |
| 1         | Donor 1 | 1.000   | 1.849 | 58.953  | 439.625 | Y     | Y     | Y     | Y     | Y     | Y     | Y     | Y     |
| 2         | Donor 2 | 1.000   | 1.269 | 287.263 | 542.792 |       |       |       |       |       |       |       |       |
| 3         | Donor 3 | 1.000   | 0.741 | 60.880  | 209.010 |       |       |       |       |       |       |       |       |
| 4         |         |         |       |         |         |       |       |       |       |       |       |       |       |
| 5         |         |         |       |         |         |       |       |       |       |       |       |       |       |
| 6         |         |         |       |         |         |       |       |       |       |       |       |       |       |
| 7         |         |         |       |         |         |       |       |       |       |       |       |       |       |
| 8         |         |         |       |         |         |       |       |       |       |       |       |       |       |
| 9         |         |         |       |         |         |       |       |       |       |       |       |       |       |
| 10        |         |         |       |         |         |       |       |       |       |       |       |       |       |
| 11        |         |         |       |         |         |       |       |       |       |       |       |       |       |
| 12        |         |         |       |         |         |       |       |       |       |       |       |       |       |
| 13        |         |         |       |         |         |       |       |       |       |       |       |       |       |
| 14        |         |         |       |         |         |       |       |       |       |       |       |       |       |
| 15        |         |         |       |         |         |       |       |       |       |       |       |       |       |
| 16        |         |         |       |         |         |       |       |       |       |       |       |       |       |
| 17        |         |         |       |         |         |       |       |       |       |       |       |       |       |
| 18        |         |         |       |         |         |       |       |       |       |       |       |       |       |
| 19        |         |         |       |         |         |       |       |       |       |       |       |       |       |
| 20        |         |         |       |         |         |       |       |       |       |       |       |       |       |
| 21        |         |         |       |         |         |       |       |       |       |       |       |       |       |
| 22        |         |         |       |         |         |       |       |       |       |       |       |       |       |
| 23        |         |         |       |         |         |       |       |       |       |       |       |       |       |
| 24        |         |         |       |         |         |       |       |       |       |       |       |       |       |
| 25        |         |         |       |         |         |       |       |       |       |       |       |       |       |
| 26        |         |         |       |         |         |       |       |       |       |       |       |       |       |
| 27        |         |         |       |         |         |       |       |       |       |       |       |       |       |
| 28        |         |         |       |         |         |       |       |       |       |       |       |       |       |

Transpose of IL-6

Row 1, A: Control

SourceDataforFigure2B — Edited

Prism 8

File Sheet Undo Clipboard Analysis Interpret Change Draw Write Text Export Print Send LA Help

Q Search

▼ Info Project Info 1

⊕ New Info...

▼ Results

- Transpose of TNF
- Transform of TNF
- Ordinary one-way ANOVA of Transform of TNF
- Transpose of IL-6
- Transform of IL-6
- Ordinary one-way ANOVA of Transform of IL-6
- Transpose of IL-10
- Transform of IL-10
- Ordinary one-way ANOVA of Transform of IL-10
- Transpose of IL-1beta
- Transform IL-1beta
- Ordinary one-way ANOVA of Transform IL-1beta

⊕ New Analysis...

▼ Graphs

- TNF

Family

- IL-6
  - Transpose
  - Transform of IL-6
  - Ordinary one-way ANOVA

| Transform |         | A       | B      | C     | D      | E     | F     | G     | H     | I     | J     | K     | L     |
|-----------|---------|---------|--------|-------|--------|-------|-------|-------|-------|-------|-------|-------|-------|
|           |         | Control | Hyx    | XO    | XO+Hyx | Title | Title | Title | Title | Title | Title | Title | Title |
|           |         | Y       | Y      | Y     | Y      | Y     | Y     | Y     | Y     | Y     | Y     | Y     | Y     |
| 1         | Donor 1 | 0.000   | 0.267  | 1.771 | 2.643  |       |       |       |       |       |       |       |       |
| 2         | Donor 2 | 0.000   | 0.103  | 2.458 | 2.735  |       |       |       |       |       |       |       |       |
| 3         | Donor 3 | 0.000   | -0.130 | 1.784 | 2.320  |       |       |       |       |       |       |       |       |
| 4         |         |         |        |       |        |       |       |       |       |       |       |       |       |
| 5         |         |         |        |       |        |       |       |       |       |       |       |       |       |
| 6         |         |         |        |       |        |       |       |       |       |       |       |       |       |
| 7         |         |         |        |       |        |       |       |       |       |       |       |       |       |
| 8         |         |         |        |       |        |       |       |       |       |       |       |       |       |
| 9         |         |         |        |       |        |       |       |       |       |       |       |       |       |
| 10        |         |         |        |       |        |       |       |       |       |       |       |       |       |
| 11        |         |         |        |       |        |       |       |       |       |       |       |       |       |
| 12        |         |         |        |       |        |       |       |       |       |       |       |       |       |
| 13        |         |         |        |       |        |       |       |       |       |       |       |       |       |
| 14        |         |         |        |       |        |       |       |       |       |       |       |       |       |
| 15        |         |         |        |       |        |       |       |       |       |       |       |       |       |
| 16        |         |         |        |       |        |       |       |       |       |       |       |       |       |
| 17        |         |         |        |       |        |       |       |       |       |       |       |       |       |
| 18        |         |         |        |       |        |       |       |       |       |       |       |       |       |
| 19        |         |         |        |       |        |       |       |       |       |       |       |       |       |
| 20        |         |         |        |       |        |       |       |       |       |       |       |       |       |
| 21        |         |         |        |       |        |       |       |       |       |       |       |       |       |
| 22        |         |         |        |       |        |       |       |       |       |       |       |       |       |
| 23        |         |         |        |       |        |       |       |       |       |       |       |       |       |
| 24        |         |         |        |       |        |       |       |       |       |       |       |       |       |
| 25        |         |         |        |       |        |       |       |       |       |       |       |       |       |
| 26        |         |         |        |       |        |       |       |       |       |       |       |       |       |
| 27        |         |         |        |       |        |       |       |       |       |       |       |       |       |
| 28        |         |         |        |       |        |       |       |       |       |       |       |       |       |

Transform of IL-6 Row 11, B: Hyx

SourceDataforFigure2B — Edited

Prism 8

ANOVA results

Multiple comparisons

Search

Info Project Info 1

New Info...

Results

- Transpose of TNF
- Transform of TNF
- Ordinary one-way ANOVA of Transform of TNF
- Transpose of IL-6
- Transform of IL-6
- Ordinary one-way ANOVA of Transform of IL-6**
- Transpose of IL-10
- Transform of IL-10
- Ordinary one-way ANOVA of Transform of IL-10
- Transpose of IL-1beta
- Transform IL-1beta
- Ordinary one-way ANOVA of Transform IL-1beta
- New Analysis...

Graphs

- TNF

Family

- IL-6
  - Transpose
  - Transform of IL-6
  - Ordinary one-way ANOVA**

| Ordinary one-way ANOVA |                                             |                   |           |           |                     |                |
|------------------------|---------------------------------------------|-------------------|-----------|-----------|---------------------|----------------|
| ANOVA results          |                                             |                   |           |           |                     |                |
| 1                      | Table Analyzed                              | Transform of IL-6 |           |           |                     |                |
| 2                      | Data sets analyzed                          | A-D               |           |           |                     |                |
| 3                      |                                             |                   |           |           |                     |                |
| 4                      | <b>ANOVA summary</b>                        |                   |           |           |                     |                |
| 5                      | F                                           | 86.05             |           |           |                     |                |
| 6                      | P value                                     | <0.0001           |           |           |                     |                |
| 7                      | P value summary                             | ****              |           |           |                     |                |
| 8                      | Significant diff. among means (P < 0.05)?   | Yes               |           |           |                     |                |
| 9                      | R square                                    | 0.9699            |           |           |                     |                |
| 10                     |                                             |                   |           |           |                     |                |
| 11                     | <b>Brown-Forsythe test</b>                  |                   |           |           |                     |                |
| 12                     | F (DFn, DFd)                                | 0.5616 (3, 8)     |           |           |                     |                |
| 13                     | P value                                     | 0.6552            |           |           |                     |                |
| 14                     | P value summary                             | ns                |           |           |                     |                |
| 15                     | Are SDs significantly different (P < 0.05)? | No                |           |           |                     |                |
| 16                     |                                             |                   |           |           |                     |                |
| 17                     | <b>Bartlett's test</b>                      |                   |           |           |                     |                |
| 18                     | Bartlett's statistic (corrected)            |                   |           |           |                     |                |
| 19                     | P value                                     |                   |           |           |                     |                |
| 20                     | P value summary                             |                   |           |           |                     |                |
| 21                     | Are SDs significantly different (P < 0.05)? |                   |           |           |                     |                |
| 22                     |                                             |                   |           |           |                     |                |
| 23                     | <b>ANOVA table</b>                          | <b>SS</b>         | <b>DF</b> | <b>MS</b> | <b>F (DFn, DFd)</b> | <b>P value</b> |
| 24                     | Treatment (between columns)                 | 15.61             | 3         | 5.202     | F (3, 8) = 86.05    | P<0.0001       |
| 25                     | Residual (within columns)                   | 0.4836            | 8         | 0.06045   |                     |                |
| 26                     | Total                                       | 16.09             | 11        |           |                     |                |
| 27                     |                                             |                   |           |           |                     |                |

Ordinary one-way ANOVA of Transform of IL-6

Row 1, Column A

SourceDataforFigure2B — Edited

Prism 8

ANOVA results

Multiple comparisons

Info

Results

- Transpose of TNF
- Transform of TNF
- Ordinary one-way ANOVA of Transform of TNF
- Transpose of IL-6
- Transform of IL-6
- Ordinary one-way ANOVA of Transform of IL-6**
- Transpose of IL-10
- Transform of IL-10
- Ordinary one-way ANOVA of Transform of IL-10
- Transpose of IL-1beta
- Transform IL-1beta
- Ordinary one-way ANOVA of Transform IL-1beta

Graphs

- TNF

Family

- IL-6
  - Transpose
  - Transform of IL-6
  - Ordinary one-way ANOVA**

| ANOVA results                 |                                    | Multiple comparisons |                           |                     |                    |                         |           |          |           |
|-------------------------------|------------------------------------|----------------------|---------------------------|---------------------|--------------------|-------------------------|-----------|----------|-----------|
| <b>Ordinary one-way ANOVA</b> |                                    |                      |                           |                     |                    |                         |           |          |           |
| Multiple comparisons          |                                    |                      |                           |                     |                    |                         |           |          |           |
| 1                             | Number of families                 | 1                    |                           |                     |                    |                         |           |          |           |
| 2                             | Number of comparisons per          | 6                    |                           |                     |                    |                         |           |          |           |
| 3                             | Alpha                              | 0.05                 |                           |                     |                    |                         |           |          |           |
| 4                             |                                    |                      |                           |                     |                    |                         |           |          |           |
| 5                             | <b>Tukey's multiple comparison</b> | <b>Mean Diff.</b>    | <b>95.00% CI of diff.</b> | <b>Significant?</b> | <b>Summary</b>     | <b>Adjusted P Value</b> |           |          |           |
| 6                             | Control vs. Hyx                    | -0.08002             | -0.7229 to 0.5629         | No                  | ns                 | 0.9771                  |           | A-B      |           |
| 7                             | Control vs. XO                     | -2.004               | -2.647 to -1.362          | Yes                 | ****               | <0.0001                 |           | A-C      |           |
| 8                             | Control vs. XO+Hyx                 | -2.566               | -3.209 to -1.923          | Yes                 | ****               | <0.0001                 |           | A-D      |           |
| 9                             | Hyx vs. XO                         | -1.924               | -2.567 to -1.282          | Yes                 | ****               | <0.0001                 |           | B-C      |           |
| 10                            | Hyx vs. XO+Hyx                     | -2.486               | -3.129 to -1.843          | Yes                 | ****               | <0.0001                 |           | B-D      |           |
| 11                            | XO vs. XO+Hyx                      | -0.5615              | -1.204 to 0.08133         | No                  | ns                 | 0.0886                  |           | C-D      |           |
| 12                            |                                    |                      |                           |                     |                    |                         |           |          |           |
| 13                            | <b>Test details</b>                | <b>Mean 1</b>        | <b>Mean 2</b>             | <b>Mean Diff.</b>   | <b>SE of diff.</b> | <b>n1</b>               | <b>n2</b> | <b>q</b> | <b>DF</b> |
| 14                            | Control vs. Hyx                    | 0.000                | 0.08002                   | -0.08002            | 0.2008             | 3                       | 3         | 0.5637   | 8         |
| 15                            | Control vs. XO                     | 0.000                | 2.004                     | -2.004              | 0.2008             | 3                       | 3         | 14.12    | 8         |
| 16                            | Control vs. XO+Hyx                 | 0.000                | 2.566                     | -2.566              | 0.2008             | 3                       | 3         | 18.08    | 8         |
| 17                            | Hyx vs. XO                         | 0.08002              | 2.004                     | -1.924              | 0.2008             | 3                       | 3         | 13.56    | 8         |
| 18                            | Hyx vs. XO+Hyx                     | 0.08002              | 2.566                     | -2.486              | 0.2008             | 3                       | 3         | 17.51    | 8         |
| 19                            | XO vs. XO+Hyx                      | 2.004                | 2.566                     | -0.5615             | 0.2008             | 3                       | 3         | 3.956    | 8         |
| 20                            |                                    |                      |                           |                     |                    |                         |           |          |           |
| 21                            |                                    |                      |                           |                     |                    |                         |           |          |           |
| 22                            |                                    |                      |                           |                     |                    |                         |           |          |           |
| 23                            |                                    |                      |                           |                     |                    |                         |           |          |           |
| 24                            |                                    |                      |                           |                     |                    |                         |           |          |           |
| 25                            |                                    |                      |                           |                     |                    |                         |           |          |           |
| 26                            |                                    |                      |                           |                     |                    |                         |           |          |           |
| 27                            |                                    |                      |                           |                     |                    |                         |           |          |           |

Ordinary one-way ANOVA of Transform of IL-6

Row 1, Column A

SourceDataforFigure2B — Edited

Prism 8

File Sheet Undo Clipboard Analysis Interpret Change Draw Write Text Export Print Send LA Help

Q Search

▼ Info Project Info 1

⊕ New Info...

▼ Results

- Transpose of TNF
- Transform of TNF
- Ordinary one-way ANOVA of Transform of TNF
- Transpose of IL-6
- Transform of IL-6
- Ordinary one-way ANOVA of Transform of IL-6
- Transpose of IL-10**
- Transform of IL-10
- Ordinary one-way ANOVA of Transform of IL-10
- Transpose of IL-1beta
- Transform IL-1beta
- Ordinary one-way ANOVA of Transform IL-1beta
- ⊕ New Analysis...

▼ Graphs

- TNF

Family

- IL-10
  - Transpose**
    - Transform of IL-10
    - Ordinary one-way ANOVA

| Transpose |         | A       | B     | C      | D      | E     | F     | G     | H     | I     | J     | K     | L     |
|-----------|---------|---------|-------|--------|--------|-------|-------|-------|-------|-------|-------|-------|-------|
|           |         | Control | Hyx   | XO     | XO+Hyx | Title | Title | Title | Title | Title | Title | Title | Title |
|           | Y       | Y       | Y     | Y      | Y      | Y     | Y     | Y     | Y     | Y     | Y     | Y     | Y     |
| 1         | Donor 1 | 1.000   | 1.000 | 13.964 | 5.927  |       |       |       |       |       |       |       |       |
| 2         | Donor 2 | 1.000   | 1.000 | 5.479  | 41.634 |       |       |       |       |       |       |       |       |
| 3         | Donor 3 | 1.000   | 1.247 | 3.955  | 2.455  |       |       |       |       |       |       |       |       |
| 4         |         |         |       |        |        |       |       |       |       |       |       |       |       |
| 5         |         |         |       |        |        |       |       |       |       |       |       |       |       |
| 6         |         |         |       |        |        |       |       |       |       |       |       |       |       |
| 7         |         |         |       |        |        |       |       |       |       |       |       |       |       |
| 8         |         |         |       |        |        |       |       |       |       |       |       |       |       |
| 9         |         |         |       |        |        |       |       |       |       |       |       |       |       |
| 10        |         |         |       |        |        |       |       |       |       |       |       |       |       |
| 11        |         |         |       |        |        |       |       |       |       |       |       |       |       |
| 12        |         |         |       |        |        |       |       |       |       |       |       |       |       |
| 13        |         |         |       |        |        |       |       |       |       |       |       |       |       |
| 14        |         |         |       |        |        |       |       |       |       |       |       |       |       |
| 15        |         |         |       |        |        |       |       |       |       |       |       |       |       |
| 16        |         |         |       |        |        |       |       |       |       |       |       |       |       |
| 17        |         |         |       |        |        |       |       |       |       |       |       |       |       |
| 18        |         |         |       |        |        |       |       |       |       |       |       |       |       |
| 19        |         |         |       |        |        |       |       |       |       |       |       |       |       |
| 20        |         |         |       |        |        |       |       |       |       |       |       |       |       |
| 21        |         |         |       |        |        |       |       |       |       |       |       |       |       |
| 22        |         |         |       |        |        |       |       |       |       |       |       |       |       |
| 23        |         |         |       |        |        |       |       |       |       |       |       |       |       |
| 24        |         |         |       |        |        |       |       |       |       |       |       |       |       |
| 25        |         |         |       |        |        |       |       |       |       |       |       |       |       |
| 26        |         |         |       |        |        |       |       |       |       |       |       |       |       |
| 27        |         |         |       |        |        |       |       |       |       |       |       |       |       |
| 28        |         |         |       |        |        |       |       |       |       |       |       |       |       |

Transpose of IL-10

Row 1, A: Control

SourceDataforFigure2B — Edited

Prism 8

File Sheet Undo Clipboard Analysis Interpret Change Draw Write Text Export Print Send LA Help

Q Search

▼ Info Project Info 1

⊕ New Info...

▼ Results

- Transpose of TNF
- Transform of TNF
- Ordinary one-way ANOVA of Transform of TNF
- Transpose of IL-6
- Transform of IL-6
- Ordinary one-way ANOVA of Transform of IL-6
- Transpose of IL-10**
- Ordinary one-way ANOVA of Transform of IL-10
- Transpose of IL-1beta
- Transform IL-1beta
- Ordinary one-way ANOVA of Transform IL-1beta
- New Analysis...

▼ Graphs

- TNF

Family

- IL-10
  - Transpose
    - Transform of IL-10**
    - Ordinary one-way ANOVA

|    |           | A       | B     | C     | D      | E     | F     | G     | H     | I     | J     | K     | L     |
|----|-----------|---------|-------|-------|--------|-------|-------|-------|-------|-------|-------|-------|-------|
|    | Transform | Control | Hyx   | XO    | XO+Hyx | Title | Title | Title | Title | Title | Title | Title | Title |
|    |           | Y       | Y     | Y     | Y      | Y     | Y     | Y     | Y     | Y     | Y     | Y     | Y     |
| 1  | Donor 1   | 0.000   | 0.000 | 1.145 | 0.773  |       |       |       |       |       |       |       |       |
| 2  | Donor 2   | 0.000   | 0.000 | 0.739 | 1.619  |       |       |       |       |       |       |       |       |
| 3  | Donor 3   | 0.000   | 0.096 | 0.597 | 0.390  |       |       |       |       |       |       |       |       |
| 4  |           |         |       |       |        |       |       |       |       |       |       |       |       |
| 5  |           |         |       |       |        |       |       |       |       |       |       |       |       |
| 6  |           |         |       |       |        |       |       |       |       |       |       |       |       |
| 7  |           |         |       |       |        |       |       |       |       |       |       |       |       |
| 8  |           |         |       |       |        |       |       |       |       |       |       |       |       |
| 9  |           |         |       |       |        |       |       |       |       |       |       |       |       |
| 10 |           |         |       |       |        |       |       |       |       |       |       |       |       |
| 11 |           |         |       |       |        |       |       |       |       |       |       |       |       |
| 12 |           |         |       |       |        |       |       |       |       |       |       |       |       |
| 13 |           |         |       |       |        |       |       |       |       |       |       |       |       |
| 14 |           |         |       |       |        |       |       |       |       |       |       |       |       |
| 15 |           |         |       |       |        |       |       |       |       |       |       |       |       |
| 16 |           |         |       |       |        |       |       |       |       |       |       |       |       |
| 17 |           |         |       |       |        |       |       |       |       |       |       |       |       |
| 18 |           |         |       |       |        |       |       |       |       |       |       |       |       |
| 19 |           |         |       |       |        |       |       |       |       |       |       |       |       |
| 20 |           |         |       |       |        |       |       |       |       |       |       |       |       |
| 21 |           |         |       |       |        |       |       |       |       |       |       |       |       |
| 22 |           |         |       |       |        |       |       |       |       |       |       |       |       |
| 23 |           |         |       |       |        |       |       |       |       |       |       |       |       |
| 24 |           |         |       |       |        |       |       |       |       |       |       |       |       |
| 25 |           |         |       |       |        |       |       |       |       |       |       |       |       |
| 26 |           |         |       |       |        |       |       |       |       |       |       |       |       |
| 27 |           |         |       |       |        |       |       |       |       |       |       |       |       |
| 28 |           |         |       |       |        |       |       |       |       |       |       |       |       |

Transform of IL-10 Row 1, A: Control

SourceDataforFigure2B — Edited

Prism 8

File Sheet Undo Clipboard Analysis Interpret Change Draw Write Text Export Print Send LA Help

Q Search ANOVA results Multiple comparisons

▼ Info Project Info 1

⊕ New Info...

▼ Results

- Transpose of TNF
- Transform of TNF
- Ordinary one-way ANOVA of Transform of TNF
- Transpose of IL-6
- Transform of IL-6
- Ordinary one-way ANOVA of Transform of IL-6
- Transpose of IL-10
- Transform of IL-10
- Ordinary one-way ANOVA of Transform of IL-10**
- Transpose of IL-1beta
- Transform IL-1beta
- Ordinary one-way ANOVA of Transform IL-1beta

⊕ New Analysis...

▼ Graphs

- TNF

Family

- IL-10
  - Transpose
    - Transform of IL-10
    - Ordinary one-way ANOVA**

| Ordinary one-way ANOVA |                                             |                    |           |           |                     |                |
|------------------------|---------------------------------------------|--------------------|-----------|-----------|---------------------|----------------|
| ANOVA results          |                                             |                    |           |           |                     |                |
| 1                      | Table Analyzed                              | Transform of IL-10 |           |           |                     |                |
| 2                      | Data sets analyzed                          | A-D                |           |           |                     |                |
| 3                      |                                             |                    |           |           |                     |                |
| 4                      | <b>ANOVA summary</b>                        |                    |           |           |                     |                |
| 5                      | F                                           | 6.230              |           |           |                     |                |
| 6                      | P value                                     | 0.0173             |           |           |                     |                |
| 7                      | P value summary                             | *                  |           |           |                     |                |
| 8                      | Significant diff. among means (P < 0.05)?   | Yes                |           |           |                     |                |
| 9                      | R square                                    | 0.7003             |           |           |                     |                |
| 10                     |                                             |                    |           |           |                     |                |
| 11                     | <b>Brown-Forsythe test</b>                  |                    |           |           |                     |                |
| 12                     | F (DFn, DFd)                                | 1.862 (3, 8)       |           |           |                     |                |
| 13                     | P value                                     | 0.2144             |           |           |                     |                |
| 14                     | P value summary                             | ns                 |           |           |                     |                |
| 15                     | Are SDs significantly different (P < 0.05)? | No                 |           |           |                     |                |
| 16                     |                                             |                    |           |           |                     |                |
| 17                     | <b>Bartlett's test</b>                      |                    |           |           |                     |                |
| 18                     | Bartlett's statistic (corrected)            |                    |           |           |                     |                |
| 19                     | P value                                     |                    |           |           |                     |                |
| 20                     | P value summary                             |                    |           |           |                     |                |
| 21                     | Are SDs significantly different (P < 0.05)? |                    |           |           |                     |                |
| 22                     |                                             |                    |           |           |                     |                |
| 23                     | <b>ANOVA table</b>                          | <b>SS</b>          | <b>DF</b> | <b>MS</b> | <b>F (DFn, DFd)</b> | <b>P value</b> |
| 24                     | Treatment (between columns)                 | 2.242              | 3         | 0.7472    | F (3, 8) = 6.230    | P=0.0173       |
| 25                     | Residual (within columns)                   | 0.9595             | 8         | 0.1199    |                     |                |
| 26                     | Total                                       | 3.201              | 11        |           |                     |                |
| 27                     |                                             |                    |           |           |                     |                |

Ordinary one-way ANOVA of Transform of IL-10 Row 1, Column A

SourceDataforFigure2B — Edited

Prism 8

ANOVA results

Multiple comparisons

Info

Results

- Transpose of TNF
- Transform of TNF
- Ordinary one-way ANOVA of Transform of TNF
- Transpose of IL-6
- Transform of IL-6
- Ordinary one-way ANOVA of Transform of IL-6
- Transpose of IL-10
- Transform of IL-10
- Ordinary one-way ANOVA of Transform of IL-10**
- Transpose of IL-1beta
- Transform IL-1beta
- Ordinary one-way ANOVA of Transform IL-1beta

Graphs

- TNF

Family

- IL-10
  - Transpose
  - Transform of IL-10
  - Ordinary one-way ANOVA**

| Ordinary one-way ANOVA |                                 | Multiple comparisons |                           |                     |                    |                         |           |          |           |
|------------------------|---------------------------------|----------------------|---------------------------|---------------------|--------------------|-------------------------|-----------|----------|-----------|
| 1                      | Number of families              | 1                    |                           |                     |                    |                         |           |          |           |
| 2                      | Number of comparisons per       | 6                    |                           |                     |                    |                         |           |          |           |
| 3                      | Alpha                           | 0.05                 |                           |                     |                    |                         |           |          |           |
| 4                      |                                 |                      |                           |                     |                    |                         |           |          |           |
| 5                      | <b>Tukey's multiple compari</b> | <b>Mean Diff.</b>    | <b>95.00% CI of diff.</b> | <b>Significant?</b> | <b>Summary</b>     | <b>Adjusted P Value</b> |           |          |           |
| 6                      | Control vs. Hyx                 | -0.03193             | -0.9375 to 0.8736         | No                  | ns                 | 0.9994                  | A-B       |          |           |
| 7                      | Control vs. XO                  | -0.8269              | -1.732 to 0.07861         | No                  | ns                 | 0.0740                  | A-C       |          |           |
| 8                      | Control vs. XO+Hyx              | -0.9274              | -1.833 to -0.02188        | Yes                 | *                  | 0.0448                  | A-D       |          |           |
| 9                      | Hyx vs. XO                      | -0.7950              | -1.701 to 0.1105          | No                  | ns                 | 0.0868                  | B-C       |          |           |
| 10                     | Hyx vs. XO+Hyx                  | -0.8955              | -1.801 to 0.01005         | No                  | ns                 | 0.0526                  | B-D       |          |           |
| 11                     | XO vs. XO+Hyx                   | -0.1005              | -1.006 to 0.8051          | No                  | ns                 | 0.9835                  | C-D       |          |           |
| 12                     |                                 |                      |                           |                     |                    |                         |           |          |           |
| 13                     | <b>Test details</b>             | <b>Mean 1</b>        | <b>Mean 2</b>             | <b>Mean Diff.</b>   | <b>SE of diff.</b> | <b>n1</b>               | <b>n2</b> | <b>q</b> | <b>DF</b> |
| 14                     | Control vs. Hyx                 | 0.000                | 0.03193                   | -0.03193            | 0.2828             | 3                       | 3         | 0.1597   | 8         |
| 15                     | Control vs. XO                  | 0.000                | 0.8269                    | -0.8269             | 0.2828             | 3                       | 3         | 4.136    | 8         |
| 16                     | Control vs. XO+Hyx              | 0.000                | 0.9274                    | -0.9274             | 0.2828             | 3                       | 3         | 4.638    | 8         |
| 17                     | Hyx vs. XO                      | 0.03193              | 0.8269                    | -0.7950             | 0.2828             | 3                       | 3         | 3.976    | 8         |
| 18                     | Hyx vs. XO+Hyx                  | 0.03193              | 0.9274                    | -0.8955             | 0.2828             | 3                       | 3         | 4.479    | 8         |
| 19                     | XO vs. XO+Hyx                   | 0.8269               | 0.9274                    | -0.1005             | 0.2828             | 3                       | 3         | 0.5026   | 8         |
| 20                     |                                 |                      |                           |                     |                    |                         |           |          |           |
| 21                     |                                 |                      |                           |                     |                    |                         |           |          |           |
| 22                     |                                 |                      |                           |                     |                    |                         |           |          |           |
| 23                     |                                 |                      |                           |                     |                    |                         |           |          |           |
| 24                     |                                 |                      |                           |                     |                    |                         |           |          |           |
| 25                     |                                 |                      |                           |                     |                    |                         |           |          |           |
| 26                     |                                 |                      |                           |                     |                    |                         |           |          |           |
| 27                     |                                 |                      |                           |                     |                    |                         |           |          |           |

Ordinary one-way ANOVA of Transform of IL-10

Row 1, Column A



SourceDataforFigure2B — Edited

Prism 8

File Sheet Undo Clipboard Analysis Interpret Change Draw Write Text Export Print Send LA Help

Q Search

▼ Info Project Info 1

⊕ New Info...

▼ Results

- Transpose of TNF
- Transform of TNF
- Ordinary one-way ANOVA of Transform of TNF
- Transpose of IL-6
- Transform of IL-6
- Ordinary one-way ANOVA of Transform of IL-6
- Transpose of IL-10
- Transform of IL-10
- Ordinary one-way ANOVA of Transform of IL-10
- Transpose of IL-1beta**
- Transform IL-1beta
- Ordinary one-way ANOVA of Transform IL-1beta

⊕ New Analysis...

▼ Graphs

- TNF

Family

- IL-1beta
  - Transpose**
    - Transform IL-1beta
    - Ordinary one-way ANOVA

| Transpose |         | A       | B     | C      | D       | E     | F     | G     | H     | I     | J     | K     | L     |
|-----------|---------|---------|-------|--------|---------|-------|-------|-------|-------|-------|-------|-------|-------|
|           |         | Control | Hyx   | XO     | XO+Hyx  | Title | Title | Title | Title | Title | Title | Title | Title |
| 1         | Donor 1 | 1.000   | 1.000 | 38.450 | 323.750 | Y     | Y     | Y     | Y     | Y     | Y     | Y     | Y     |
| 2         | Donor 2 | 1.000   | 1.112 | 7.575  | 59.554  |       |       |       |       |       |       |       |       |
| 3         | Donor 3 | 1.000   | 1.000 | 1.000  | 14.040  |       |       |       |       |       |       |       |       |
| 4         |         |         |       |        |         |       |       |       |       |       |       |       |       |
| 5         |         |         |       |        |         |       |       |       |       |       |       |       |       |
| 6         |         |         |       |        |         |       |       |       |       |       |       |       |       |
| 7         |         |         |       |        |         |       |       |       |       |       |       |       |       |
| 8         |         |         |       |        |         |       |       |       |       |       |       |       |       |
| 9         |         |         |       |        |         |       |       |       |       |       |       |       |       |
| 10        |         |         |       |        |         |       |       |       |       |       |       |       |       |
| 11        |         |         |       |        |         |       |       |       |       |       |       |       |       |
| 12        |         |         |       |        |         |       |       |       |       |       |       |       |       |
| 13        |         |         |       |        |         |       |       |       |       |       |       |       |       |
| 14        |         |         |       |        |         |       |       |       |       |       |       |       |       |
| 15        |         |         |       |        |         |       |       |       |       |       |       |       |       |
| 16        |         |         |       |        |         |       |       |       |       |       |       |       |       |
| 17        |         |         |       |        |         |       |       |       |       |       |       |       |       |
| 18        |         |         |       |        |         |       |       |       |       |       |       |       |       |
| 19        |         |         |       |        |         |       |       |       |       |       |       |       |       |
| 20        |         |         |       |        |         |       |       |       |       |       |       |       |       |
| 21        |         |         |       |        |         |       |       |       |       |       |       |       |       |
| 22        |         |         |       |        |         |       |       |       |       |       |       |       |       |
| 23        |         |         |       |        |         |       |       |       |       |       |       |       |       |
| 24        |         |         |       |        |         |       |       |       |       |       |       |       |       |
| 25        |         |         |       |        |         |       |       |       |       |       |       |       |       |
| 26        |         |         |       |        |         |       |       |       |       |       |       |       |       |
| 27        |         |         |       |        |         |       |       |       |       |       |       |       |       |
| 28        |         |         |       |        |         |       |       |       |       |       |       |       |       |

Transpose of IL-1beta

Row 1, A: Control

SourceDataforFigure2B — Edited

Prism 8

File Sheet Undo Clipboard Analysis Interpret Change Draw Write Text Export Print Send LA Help

Q Search

▼ Info Project Info 1

⊕ New Info...

▼ Results

- Transpose of TNF
- Transform of TNF
- Ordinary one-way ANOVA of Transform of TNF
- Transpose of IL-6
- Transform of IL-6
- Ordinary one-way ANOVA of Transform of IL-6
- Transpose of IL-10
- Transform of IL-10
- Ordinary one-way ANOVA of Transform of IL-10
- Transpose of IL-1beta**
- Transform IL-1beta**
- Ordinary one-way ANOVA of Transform IL-1beta

⊕ New Analysis...

▼ Graphs

- TNF

Family

- IL-1beta
  - Transpose
  - Transform IL-1beta**
  - Ordinary one-way ANOVA

|    |           | A       | B     | C     | D      | E     | F     | G     | H     | I     | J     | K     | L     |
|----|-----------|---------|-------|-------|--------|-------|-------|-------|-------|-------|-------|-------|-------|
|    | Transform | Control | Hyx   | XO    | XO+Hyx | Title | Title | Title | Title | Title | Title | Title | Title |
|    |           | Y       | Y     | Y     | Y      | Y     | Y     | Y     | Y     | Y     | Y     | Y     | Y     |
| 1  | Donor 1   | 0.000   | 0.000 | 1.585 | 2.510  |       |       |       |       |       |       |       |       |
| 2  | Donor 2   | 0.000   | 0.046 | 0.879 | 1.775  |       |       |       |       |       |       |       |       |
| 3  | Donor 3   | 0.000   | 0.000 | 0.000 | 1.147  |       |       |       |       |       |       |       |       |
| 4  |           |         |       |       |        |       |       |       |       |       |       |       |       |
| 5  |           |         |       |       |        |       |       |       |       |       |       |       |       |
| 6  |           |         |       |       |        |       |       |       |       |       |       |       |       |
| 7  |           |         |       |       |        |       |       |       |       |       |       |       |       |
| 8  |           |         |       |       |        |       |       |       |       |       |       |       |       |
| 9  |           |         |       |       |        |       |       |       |       |       |       |       |       |
| 10 |           |         |       |       |        |       |       |       |       |       |       |       |       |
| 11 |           |         |       |       |        |       |       |       |       |       |       |       |       |
| 12 |           |         |       |       |        |       |       |       |       |       |       |       |       |
| 13 |           |         |       |       |        |       |       |       |       |       |       |       |       |
| 14 |           |         |       |       |        |       |       |       |       |       |       |       |       |
| 15 |           |         |       |       |        |       |       |       |       |       |       |       |       |
| 16 |           |         |       |       |        |       |       |       |       |       |       |       |       |
| 17 |           |         |       |       |        |       |       |       |       |       |       |       |       |
| 18 |           |         |       |       |        |       |       |       |       |       |       |       |       |
| 19 |           |         |       |       |        |       |       |       |       |       |       |       |       |
| 20 |           |         |       |       |        |       |       |       |       |       |       |       |       |
| 21 |           |         |       |       |        |       |       |       |       |       |       |       |       |
| 22 |           |         |       |       |        |       |       |       |       |       |       |       |       |
| 23 |           |         |       |       |        |       |       |       |       |       |       |       |       |
| 24 |           |         |       |       |        |       |       |       |       |       |       |       |       |
| 25 |           |         |       |       |        |       |       |       |       |       |       |       |       |
| 26 |           |         |       |       |        |       |       |       |       |       |       |       |       |
| 27 |           |         |       |       |        |       |       |       |       |       |       |       |       |
| 28 |           |         |       |       |        |       |       |       |       |       |       |       |       |

Transform IL-1beta

Row 1, A: Control

SourceDataforFigure2B — Edited

Prism 8

File Sheet Undo Clipboard Analysis Interpret Change Draw Write Text Export Print Send LA Help

Q Search ANOVA results Multiple comparisons

Info Project Info 1

New Info...

Results

- Transpose of TNF
- Transform of TNF
- Ordinary one-way ANOVA of Transform of TNF
- Transpose of IL-6
- Transform of IL-6
- Ordinary one-way ANOVA of Transform of IL-6
- Transpose of IL-10
- Transform of IL-10
- Ordinary one-way ANOVA of Transform of IL-10
- Transpose of IL-1beta
- Transform IL-1beta
- Ordinary one-way ANOVA of Transform IL-1beta**

New Analysis...

Graphs

- TNF

Family

- IL-1beta
  - Transpose
    - Transform IL-1beta
    - Ordinary one-way ANOVA**

| ANOVA results                 |                                             | Multiple comparisons |           |           |                     |                |
|-------------------------------|---------------------------------------------|----------------------|-----------|-----------|---------------------|----------------|
| <b>Ordinary one-way ANOVA</b> |                                             |                      |           |           |                     |                |
| ANOVA results                 |                                             |                      |           |           |                     |                |
| 1                             | Table Analyzed                              | Transform IL-1beta   |           |           |                     |                |
| 2                             | Data sets analyzed                          | A-D                  |           |           |                     |                |
| 3                             |                                             |                      |           |           |                     |                |
| 4                             | <b>ANOVA summary</b>                        |                      |           |           |                     |                |
| 5                             | F                                           | 8.032                |           |           |                     |                |
| 6                             | P value                                     | 0.0085               |           |           |                     |                |
| 7                             | P value summary                             | **                   |           |           |                     |                |
| 8                             | Significant diff. among means (P < 0.05)?   | Yes                  |           |           |                     |                |
| 9                             | R square                                    | 0.7507               |           |           |                     |                |
| 10                            |                                             |                      |           |           |                     |                |
| 11                            | <b>Brown-Forsythe test</b>                  |                      |           |           |                     |                |
| 12                            | F (DFn, DFd)                                | 2.524 (3, 8)         |           |           |                     |                |
| 13                            | P value                                     | 0.1313               |           |           |                     |                |
| 14                            | P value summary                             | ns                   |           |           |                     |                |
| 15                            | Are SDs significantly different (P < 0.05)? | No                   |           |           |                     |                |
| 16                            |                                             |                      |           |           |                     |                |
| 17                            | <b>Bartlett's test</b>                      |                      |           |           |                     |                |
| 18                            | Bartlett's statistic (corrected)            |                      |           |           |                     |                |
| 19                            | P value                                     |                      |           |           |                     |                |
| 20                            | P value summary                             |                      |           |           |                     |                |
| 21                            | Are SDs significantly different (P < 0.05)? |                      |           |           |                     |                |
| 22                            |                                             |                      |           |           |                     |                |
| 23                            | <b>ANOVA table</b>                          | <b>SS</b>            | <b>DF</b> | <b>MS</b> | <b>F (DFn, DFd)</b> | <b>P value</b> |
| 24                            | Treatment (between columns)                 | 6.605                | 3         | 2.202     | F (3, 8) = 8.032    | P=0.0085       |
| 25                            | Residual (within columns)                   | 2.193                | 8         | 0.2741    |                     |                |
| 26                            | Total                                       | 8.798                | 11        |           |                     |                |
| 27                            |                                             |                      |           |           |                     |                |

Ordinary one-way ANOVA of Transform IL-1beta Row 1, Column A

SourceDataforFigure2B — Edited

Prism 8

ANOVA results

Multiple comparisons

Info

Results

- Transpose of TNF
- Transform of TNF
- Ordinary one-way ANOVA of Transform of TNF
- Transpose of IL-6
- Transform of IL-6
- Ordinary one-way ANOVA of Transform of IL-6
- Transpose of IL-10
- Transform of IL-10
- Ordinary one-way ANOVA of Transform of IL-10
- Transpose of IL-1beta
- Transform IL-1beta
- Ordinary one-way ANOVA of Transform IL-1beta

Graphs

- TNF

Family

- IL-1beta
  - Transpose
  - Transform IL-1beta
  - Ordinary one-way ANOVA

| 1  | Number of families      | 1          |                    |              |             |                  |     |         |    |
|----|-------------------------|------------|--------------------|--------------|-------------|------------------|-----|---------|----|
| 2  | Number of comparisons p | 6          |                    |              |             |                  |     |         |    |
| 3  | Alpha                   | 0.05       |                    |              |             |                  |     |         |    |
| 5  | Tukey's multiple compa  | Mean Diff. | 95.00% CI of diff. | Significant? | Summary     | Adjusted P Value |     |         |    |
| 6  | Control vs. Hyx         | -0.01530   | -1.384 to 1.354    | No           | ns          | >0.9999          | A-B |         |    |
| 7  | Control vs. XO          | -0.8214    | -2.190 to 0.5476   | No           | ns          | 0.2920           | A-C |         |    |
| 8  | Control vs. XO+Hyx      | -1.811     | -3.180 to -0.4418  | Yes          | *           | 0.0122           | A-D |         |    |
| 9  | Hyx vs. XO              | -0.8061    | -2.175 to 0.5629   | No           | ns          | 0.3055           | B-C |         |    |
| 10 | Hyx vs. XO+Hyx          | -1.796     | -3.165 to -0.4265  | Yes          | *           | 0.0128           | B-D |         |    |
| 11 | XO vs. XO+Hyx           | -0.9894    | -2.358 to 0.3796   | No           | ns          | 0.1736           | C-D |         |    |
| 13 | Test details            | Mean 1     | Mean 2             | Mean Diff.   | SE of diff. | n1               | n2  | q       | DF |
| 14 | Control vs. Hyx         | 0.000      | 0.01530            | -0.01530     | 0.4275      | 3                | 3   | 0.05063 | 8  |
| 15 | Control vs. XO          | 0.000      | 0.8214             | -0.8214      | 0.4275      | 3                | 3   | 2.717   | 8  |
| 16 | Control vs. XO+Hyx      | 0.000      | 1.811              | -1.811       | 0.4275      | 3                | 3   | 5.991   | 8  |
| 17 | Hyx vs. XO              | 0.01530    | 0.8214             | -0.8061      | 0.4275      | 3                | 3   | 2.667   | 8  |
| 18 | Hyx vs. XO+Hyx          | 0.01530    | 1.811              | -1.796       | 0.4275      | 3                | 3   | 5.940   | 8  |
| 19 | XO vs. XO+Hyx           | 0.8214     | 1.811              | -0.9894      | 0.4275      | 3                | 3   | 3.273   | 8  |
| 20 |                         |            |                    |              |             |                  |     |         |    |
| 21 |                         |            |                    |              |             |                  |     |         |    |
| 22 |                         |            |                    |              |             |                  |     |         |    |
| 23 |                         |            |                    |              |             |                  |     |         |    |
| 24 |                         |            |                    |              |             |                  |     |         |    |
| 25 |                         |            |                    |              |             |                  |     |         |    |
| 26 |                         |            |                    |              |             |                  |     |         |    |
| 27 |                         |            |                    |              |             |                  |     |         |    |

Ordinary one-way ANOVA of Transform IL-1b

Row 24, Column C

File Sheet Undo Clipboard Analysis Change Import Draw Write Text Export Print Send LA Help

10 Arial

Analyze Analyze

123 123

Text

Export Print Send LA Help

| Table format: Grouped   |    | Group A | Group B | Group C      | Group D       | Group E | Group F | Group G | Group H | Group I | Group J | Group K | Group L |
|-------------------------|----|---------|---------|--------------|---------------|---------|---------|---------|---------|---------|---------|---------|---------|
|                         |    | Donor 1 | Donor 2 | Donor 3      | Title         | Title   | Title   | Title   | Title   | Title   | Title   | Title   | Title   |
| <b>TNF</b>              |    | Y       | Y       | Y            | Y             | Y       | Y       | Y       | Y       | Y       | Y       | Y       | Y       |
| TNF lines               | 1  | Control | 1.00    | 1.000000000  | 1.000000000   |         |         |         |         |         |         |         |         |
| IL6                     | 2  | Feb     | 1.00    | 0.215918046  | 0.436860068   |         |         |         |         |         |         |         |         |
| IL6 lines               | 3  | XO      | 266.05  | 77.128447600 | 378.696245700 |         |         |         |         |         |         |         |         |
| IL10                    | 4  | XO+Feb  | 1.00    | 0.312056738  | 108.327645100 |         |         |         |         |         |         |         |         |
| IL10 lines              | 5  | Title   |         |              |               |         |         |         |         |         |         |         |         |
| IL1beta                 | 6  | Title   |         |              |               |         |         |         |         |         |         |         |         |
| IL1beta lines           | 7  | Title   |         |              |               |         |         |         |         |         |         |         |         |
| New Data Table...       | 8  | Title   |         |              |               |         |         |         |         |         |         |         |         |
| Info                    | 9  | Title   |         |              |               |         |         |         |         |         |         |         |         |
| Project info 1          | 10 | Title   |         |              |               |         |         |         |         |         |         |         |         |
| Project info 1          | 11 | Title   |         |              |               |         |         |         |         |         |         |         |         |
| New Info...             | 12 | Title   |         |              |               |         |         |         |         |         |         |         |         |
| Results                 | 13 | Title   |         |              |               |         |         |         |         |         |         |         |         |
| Transpose of TNF        | 14 | Title   |         |              |               |         |         |         |         |         |         |         |         |
| Transform of TNF        | 15 | Title   |         |              |               |         |         |         |         |         |         |         |         |
| RM one-way ANOVA of TNF | 16 | Title   |         |              |               |         |         |         |         |         |         |         |         |
| Transpose of IL6        | 17 | Title   |         |              |               |         |         |         |         |         |         |         |         |
| Transform of IL6        | 18 | Title   |         |              |               |         |         |         |         |         |         |         |         |
| RM one-way ANOVA of IL6 | 19 | Title   |         |              |               |         |         |         |         |         |         |         |         |
| Transpose of IL10       | 20 | Title   |         |              |               |         |         |         |         |         |         |         |         |
| Family                  | 21 | Title   |         |              |               |         |         |         |         |         |         |         |         |
| TNF                     | 22 | Title   |         |              |               |         |         |         |         |         |         |         |         |
| Transpose               | 23 | Title   |         |              |               |         |         |         |         |         |         |         |         |
| Transform of TNF        | 24 | Title   |         |              |               |         |         |         |         |         |         |         |         |
| RM one-way ANOVA of TNF | 25 | Title   |         |              |               |         |         |         |         |         |         |         |         |
| Linear TNF              | 26 | Title   |         |              |               |         |         |         |         |         |         |         |         |
|                         | 27 | Title   |         |              |               |         |         |         |         |         |         |         |         |

File Sheet Undo Clipboard Analysis Change Import Draw Write Text Export Print Send LA Help

10 Arial

Analyze

123

txt xml

T T A A B I U x<sup>2</sup> x<sub>2</sub>

Export Print Send LA Help

| Search           |        | Table format: | Group A | Group B      | Group C       | Group D | Group E | Group F | Group G | Group H | Group I | Group J | Group K |
|------------------|--------|---------------|---------|--------------|---------------|---------|---------|---------|---------|---------|---------|---------|---------|
| ▼ Data Tables >> |        | Grouped       | Donor 1 | Donor 2      | Donor 3       | Title   | Title   | Title   | Title   | Title   | Title   | Title   | Title   |
| TNF              |        |               | Y       | Y            | Y             | Y       | Y       | Y       | Y       | Y       | Y       | Y       | Y       |
| TNF lines        |        |               |         |              |               |         |         |         |         |         |         |         |         |
| 1                | XO     |               | 266.05  | 77.128447600 | 378.696245700 |         |         |         |         |         |         |         |         |
| 2                | XO+Feb |               | 1.00    | 0.312056738  | 108.327645100 |         |         |         |         |         |         |         |         |
| 3                | Title  |               |         |              |               |         |         |         |         |         |         |         |         |
| 4                | Title  |               |         |              |               |         |         |         |         |         |         |         |         |
| 5                | Title  |               |         |              |               |         |         |         |         |         |         |         |         |
| 6                | Title  |               |         |              |               |         |         |         |         |         |         |         |         |
| 7                | Title  |               |         |              |               |         |         |         |         |         |         |         |         |
| ▼ Info >>        |        |               |         |              |               |         |         |         |         |         |         |         |         |
| 8                | Title  |               |         |              |               |         |         |         |         |         |         |         |         |
| 9                | Title  |               |         |              |               |         |         |         |         |         |         |         |         |
| 10               | Title  |               |         |              |               |         |         |         |         |         |         |         |         |
| ▼ Results >>     |        |               |         |              |               |         |         |         |         |         |         |         |         |
| 11               | Title  |               |         |              |               |         |         |         |         |         |         |         |         |
| 12               | Title  |               |         |              |               |         |         |         |         |         |         |         |         |
| 13               | Title  |               |         |              |               |         |         |         |         |         |         |         |         |
| 14               | Title  |               |         |              |               |         |         |         |         |         |         |         |         |
| 15               | Title  |               |         |              |               |         |         |         |         |         |         |         |         |
| 16               | Title  |               |         |              |               |         |         |         |         |         |         |         |         |
| 17               | Title  |               |         |              |               |         |         |         |         |         |         |         |         |
| Family >>        |        |               |         |              |               |         |         |         |         |         |         |         |         |
| 18               | Title  |               |         |              |               |         |         |         |         |         |         |         |         |
| 19               | Title  |               |         |              |               |         |         |         |         |         |         |         |         |
| 20               | Title  |               |         |              |               |         |         |         |         |         |         |         |         |
| 21               | Title  |               |         |              |               |         |         |         |         |         |         |         |         |
| 22               | Title  |               |         |              |               |         |         |         |         |         |         |         |         |
| 23               | Title  |               |         |              |               |         |         |         |         |         |         |         |         |
| 24               | Title  |               |         |              |               |         |         |         |         |         |         |         |         |
| 25               | Title  |               |         |              |               |         |         |         |         |         |         |         |         |
| 26               | Title  |               |         |              |               |         |         |         |         |         |         |         |         |
| 27               | Title  |               |         |              |               |         |         |         |         |         |         |         |         |

File Sheet Undo Clipboard Analysis Change Import Draw Write Text Export Print Send LA Help

10 Arial

Analyze

123

txt xml

T T A A B I U X<sup>2</sup> X<sub>2</sub>

Export Print Send LA Help

| Table format: |         | Group A | Group B       | Group C  | Group D | Group E | Group F | Group G | Group H | Group I | Group J | Group K | Group L |
|---------------|---------|---------|---------------|----------|---------|---------|---------|---------|---------|---------|---------|---------|---------|
| Grouped       |         | Donor 1 | Donor 2       | Donor 3  | Title   | Title   | Title   | Title   | Title   | Title   | Title   | Title   | Title   |
|               |         | Y       | Y             | Y        | Y       | Y       | Y       | Y       | Y       | Y       | Y       | Y       | Y       |
| 1             | Control | 1.00    | 1.000000000   | 1.000    |         |         |         |         |         |         |         |         |         |
| 2             | Feb     | 1.00    | 0.868525896   | 1.000    |         |         |         |         |         |         |         |         |         |
| 3             | XO      | 618.89  | 131.298804800 | 612.270  |         |         |         |         |         |         |         |         |         |
| 4             | XO+Feb  | 68.52   | 54.183266930  | 2020.025 |         |         |         |         |         |         |         |         |         |
| 5             | Title   |         |               |          |         |         |         |         |         |         |         |         |         |
| 6             | Title   |         |               |          |         |         |         |         |         |         |         |         |         |
| 7             | Title   |         |               |          |         |         |         |         |         |         |         |         |         |
| 8             | Title   |         |               |          |         |         |         |         |         |         |         |         |         |
| 9             | Title   |         |               |          |         |         |         |         |         |         |         |         |         |
| 10            | Title   |         |               |          |         |         |         |         |         |         |         |         |         |
| 11            | Title   |         |               |          |         |         |         |         |         |         |         |         |         |
| 12            | Title   |         |               |          |         |         |         |         |         |         |         |         |         |
| 13            | Title   |         |               |          |         |         |         |         |         |         |         |         |         |
| 14            | Title   |         |               |          |         |         |         |         |         |         |         |         |         |
| 15            | Title   |         |               |          |         |         |         |         |         |         |         |         |         |
| 16            | Title   |         |               |          |         |         |         |         |         |         |         |         |         |
| 17            | Title   |         |               |          |         |         |         |         |         |         |         |         |         |
| 18            | Title   |         |               |          |         |         |         |         |         |         |         |         |         |
| 19            | Title   |         |               |          |         |         |         |         |         |         |         |         |         |
| 20            | Title   |         |               |          |         |         |         |         |         |         |         |         |         |
| 21            | Title   |         |               |          |         |         |         |         |         |         |         |         |         |
| 22            | Title   |         |               |          |         |         |         |         |         |         |         |         |         |
| 23            | Title   |         |               |          |         |         |         |         |         |         |         |         |         |
| 24            | Title   |         |               |          |         |         |         |         |         |         |         |         |         |
| 25            | Title   |         |               |          |         |         |         |         |         |         |         |         |         |
| 26            | Title   |         |               |          |         |         |         |         |         |         |         |         |         |
| 27            | Title   |         |               |          |         |         |         |         |         |         |         |         |         |

File Sheet Undo Clipboard Analysis Change Import Draw Write Text Export Print Send LA Help

10 Arial

Text formatting options: Bold, Italic, Underline, etc.

| Table format: Grouped |        | Group A | Group B       | Group C  | Group D | Group E | Group F | Group G | Group H | Group I | Group J | Group K | Group L |
|-----------------------|--------|---------|---------------|----------|---------|---------|---------|---------|---------|---------|---------|---------|---------|
|                       |        | Donor 1 | Donor 2       | Donor 3  | 1       | 1       | Title   | Title   | Title   | Title   | Title   | Title   | Title   |
|                       |        | Y       | Y             | Y        | Y       | Y       | Y       | Y       | Y       | Y       | Y       | Y       | Y       |
| 1                     | XO     | 618.89  | 131.298804800 | 612.270  |         |         |         |         |         |         |         |         |         |
| 2                     | XO+Feb | 68.52   | 54.183266930  | 2020.025 |         |         |         |         |         |         |         |         |         |
| 3                     | Title  |         |               |          |         |         |         |         |         |         |         |         |         |
| 4                     | Title  |         |               |          |         |         |         |         |         |         |         |         |         |
| 5                     | Title  |         |               |          |         |         |         |         |         |         |         |         |         |
| 6                     | Title  |         |               |          |         |         |         |         |         |         |         |         |         |
| 7                     | Title  |         |               |          |         |         |         |         |         |         |         |         |         |
| 8                     | Title  |         |               |          |         |         |         |         |         |         |         |         |         |
| 9                     | Title  |         |               |          |         |         |         |         |         |         |         |         |         |
| 10                    | Title  |         |               |          |         |         |         |         |         |         |         |         |         |
| 11                    | Title  |         |               |          |         |         |         |         |         |         |         |         |         |
| 12                    | Title  |         |               |          |         |         |         |         |         |         |         |         |         |
| 13                    | Title  |         |               |          |         |         |         |         |         |         |         |         |         |
| 14                    | Title  |         |               |          |         |         |         |         |         |         |         |         |         |
| 15                    | Title  |         |               |          |         |         |         |         |         |         |         |         |         |
| 16                    | Title  |         |               |          |         |         |         |         |         |         |         |         |         |
| 17                    | Title  |         |               |          |         |         |         |         |         |         |         |         |         |
| 18                    | Title  |         |               |          |         |         |         |         |         |         |         |         |         |
| 19                    | Title  |         |               |          |         |         |         |         |         |         |         |         |         |
| 20                    | Title  |         |               |          |         |         |         |         |         |         |         |         |         |
| 21                    | Title  |         |               |          |         |         |         |         |         |         |         |         |         |
| 22                    | Title  |         |               |          |         |         |         |         |         |         |         |         |         |
| 23                    | Title  |         |               |          |         |         |         |         |         |         |         |         |         |
| 24                    | Title  |         |               |          |         |         |         |         |         |         |         |         |         |
| 25                    | Title  |         |               |          |         |         |         |         |         |         |         |         |         |
| 26                    | Title  |         |               |          |         |         |         |         |         |         |         |         |         |
| 27                    | Title  |         |               |          |         |         |         |         |         |         |         |         |         |



File Sheet Undo Clipboard Analysis Change Import Draw Write Text Export Print Send LA Help

10 Arial

Analyze

123

txt xml

T T A A B I U x<sup>2</sup> x<sub>2</sub>

Export Print Send LA Help

| Table format: Grouped |         | Group A | Group B     | Group C      | Group D | Group E | Group F | Group G | Group H | Group I | Group J | Group K | Group L |
|-----------------------|---------|---------|-------------|--------------|---------|---------|---------|---------|---------|---------|---------|---------|---------|
|                       |         | Donor 1 | Donor 2     | Donor 3      | Title   | Title   | Title   | Title   | Title   | Title   | Title   | Title   | Title   |
|                       |         | Y       | Y           | Y            | Y       | Y       | Y       | Y       | Y       | Y       | Y       | Y       | Y       |
| 1                     | Control | 1.00    | 1.000000000 | 1.000000000  |         |         |         |         |         |         |         |         |         |
| 2                     | Feb     | 1.00    | 0.645161290 | 0.617283951  |         |         |         |         |         |         |         |         |         |
| 3                     | XO      | 9.08    | 1.709677419 | 39.447530860 |         |         |         |         |         |         |         |         |         |
| 4                     | XO+Feb  | 1.00    | 1.032258065 | 0.617283951  |         |         |         |         |         |         |         |         |         |
| 5                     | Title   |         |             |              |         |         |         |         |         |         |         |         |         |
| 6                     | Title   |         |             |              |         |         |         |         |         |         |         |         |         |
| 7                     | Title   |         |             |              |         |         |         |         |         |         |         |         |         |
| 8                     | Title   |         |             |              |         |         |         |         |         |         |         |         |         |
| 9                     | Title   |         |             |              |         |         |         |         |         |         |         |         |         |
| 10                    | Title   |         |             |              |         |         |         |         |         |         |         |         |         |
| 11                    | Title   |         |             |              |         |         |         |         |         |         |         |         |         |
| 12                    | Title   |         |             |              |         |         |         |         |         |         |         |         |         |
| 13                    | Title   |         |             |              |         |         |         |         |         |         |         |         |         |
| 14                    | Title   |         |             |              |         |         |         |         |         |         |         |         |         |
| 15                    | Title   |         |             |              |         |         |         |         |         |         |         |         |         |
| 16                    | Title   |         |             |              |         |         |         |         |         |         |         |         |         |
| 17                    | Title   |         |             |              |         |         |         |         |         |         |         |         |         |
| 18                    | Title   |         |             |              |         |         |         |         |         |         |         |         |         |
| 19                    | Title   |         |             |              |         |         |         |         |         |         |         |         |         |
| 20                    | Title   |         |             |              |         |         |         |         |         |         |         |         |         |
| 21                    | Title   |         |             |              |         |         |         |         |         |         |         |         |         |
| 22                    | Title   |         |             |              |         |         |         |         |         |         |         |         |         |
| 23                    | Title   |         |             |              |         |         |         |         |         |         |         |         |         |
| 24                    | Title   |         |             |              |         |         |         |         |         |         |         |         |         |
| 25                    | Title   |         |             |              |         |         |         |         |         |         |         |         |         |
| 26                    | Title   |         |             |              |         |         |         |         |         |         |         |         |         |
| 27                    | Title   |         |             |              |         |         |         |         |         |         |         |         |         |

File Sheet Undo Clipboard Analysis Change Import Draw Write Text Export Print Send LA Help

10 Arial

Analyze

123

T T A A B I U x<sup>2</sup> x<sub>2</sub>

txt xml

Export Print Send LA Help

| Table format: Grouped     |    | Group A | Group B | Group C     | Group D      | Group E | Group F | Group G | Group H | Group I | Group J | Group K | Group L |
|---------------------------|----|---------|---------|-------------|--------------|---------|---------|---------|---------|---------|---------|---------|---------|
|                           |    | Donor 1 | Donor 2 | Donor 3     | Title        | Title   | Title   | Title   | Title   | Title   | Title   | Title   | Title   |
| ▼ Data Tables             |    | Y       | Y       | Y           | Y            | Y       | Y       | Y       | Y       | Y       | Y       | Y       | Y       |
| TNF                       |    |         |         |             |              |         |         |         |         |         |         |         |         |
| TNF lines                 | 1  | XO      | 9.08    | 1.709677419 | 39.447530860 |         |         |         |         |         |         |         |         |
| IL6                       | 2  | XO+Feb  | 1.00    | 1.032258065 | 0.617283951  |         |         |         |         |         |         |         |         |
| IL6 lines                 | 3  | Title   |         |             |              |         |         |         |         |         |         |         |         |
| IL10                      | 4  | Title   |         |             |              |         |         |         |         |         |         |         |         |
| IL10 lines                | 5  | Title   |         |             |              |         |         |         |         |         |         |         |         |
| IL1beta                   | 6  | Title   |         |             |              |         |         |         |         |         |         |         |         |
| IL1beta lines             | 7  | Title   |         |             |              |         |         |         |         |         |         |         |         |
| + New Data Table...       | 8  | Title   |         |             |              |         |         |         |         |         |         |         |         |
| ▼ Info                    | 9  | Title   |         |             |              |         |         |         |         |         |         |         |         |
| Project info 1            | 10 | Title   |         |             |              |         |         |         |         |         |         |         |         |
| Project info 1            | 11 | Title   |         |             |              |         |         |         |         |         |         |         |         |
| + New Info...             | 12 | Title   |         |             |              |         |         |         |         |         |         |         |         |
| ▼ Results                 | 13 | Title   |         |             |              |         |         |         |         |         |         |         |         |
| Transpose of TNF          | 14 | Title   |         |             |              |         |         |         |         |         |         |         |         |
| Transform of TNF          | 15 | Title   |         |             |              |         |         |         |         |         |         |         |         |
| RM one-way ANOVA of Trans | 16 | Title   |         |             |              |         |         |         |         |         |         |         |         |
| Transpose of IL6          | 17 | Title   |         |             |              |         |         |         |         |         |         |         |         |
| Transform of IL6          | 18 | Title   |         |             |              |         |         |         |         |         |         |         |         |
| RM one-way ANOVA of Trans | 19 | Title   |         |             |              |         |         |         |         |         |         |         |         |
| Transpose of IL10         | 20 | Title   |         |             |              |         |         |         |         |         |         |         |         |
| Family                    | 21 | Title   |         |             |              |         |         |         |         |         |         |         |         |
| IL10 lines                | 22 | Title   |         |             |              |         |         |         |         |         |         |         |         |
| Linear IL10 lines         | 23 | Title   |         |             |              |         |         |         |         |         |         |         |         |
|                           | 24 | Title   |         |             |              |         |         |         |         |         |         |         |         |
|                           | 25 | Title   |         |             |              |         |         |         |         |         |         |         |         |
|                           | 26 | Title   |         |             |              |         |         |         |         |         |         |         |         |
|                           | 27 | Title   |         |             |              |         |         |         |         |         |         |         |         |

File Sheet Undo Clipboard Analysis Change Import Draw Write Text Export Print Send LA Help

10 Arial

T T A A B I U x<sup>2</sup> x<sub>2</sub>

| Table format: |         | Group A | Group B | Group C | Group D | Group E | Group F | Group G | Group H | Group I | Group J | Group K | Group L |
|---------------|---------|---------|---------|---------|---------|---------|---------|---------|---------|---------|---------|---------|---------|
| Grouped       |         | Donor 1 | Donor 2 | Donor 3 | Title   | Title   | Title   | Title   | Title   | Title   | Title   | Title   | Title   |
|               |         | Y       | Y       | Y       | Y       | Y       | Y       | Y       | Y       | Y       | Y       | Y       | Y       |
| 1             | Control | 1.00    | 1       | 1.000   |         |         |         |         |         |         |         |         |         |
| 2             | Feb     | 1.00    | 1       | 1.000   |         |         |         |         |         |         |         |         |         |
| 3             | XO      | 7.18    | 1       | 9.940   |         |         |         |         |         |         |         |         |         |
| 4             | XO+Feb  | 1.00    | 1       | 3.885   |         |         |         |         |         |         |         |         |         |
| 5             | Title   |         |         |         |         |         |         |         |         |         |         |         |         |
| 6             | Title   |         |         |         |         |         |         |         |         |         |         |         |         |
| 7             | Title   |         |         |         |         |         |         |         |         |         |         |         |         |
| 8             | Title   |         |         |         |         |         |         |         |         |         |         |         |         |
| 9             | Title   |         |         |         |         |         |         |         |         |         |         |         |         |
| 10            | Title   |         |         |         |         |         |         |         |         |         |         |         |         |
| 11            | Title   |         |         |         |         |         |         |         |         |         |         |         |         |
| 12            | Title   |         |         |         |         |         |         |         |         |         |         |         |         |
| 13            | Title   |         |         |         |         |         |         |         |         |         |         |         |         |
| 14            | Title   |         |         |         |         |         |         |         |         |         |         |         |         |
| 15            | Title   |         |         |         |         |         |         |         |         |         |         |         |         |
| 16            | Title   |         |         |         |         |         |         |         |         |         |         |         |         |
| 17            | Title   |         |         |         |         |         |         |         |         |         |         |         |         |
| 18            | Title   |         |         |         |         |         |         |         |         |         |         |         |         |
| 19            | Title   |         |         |         |         |         |         |         |         |         |         |         |         |
| 20            | Title   |         |         |         |         |         |         |         |         |         |         |         |         |
| 21            | Title   |         |         |         |         |         |         |         |         |         |         |         |         |
| 22            | Title   |         |         |         |         |         |         |         |         |         |         |         |         |
| 23            | Title   |         |         |         |         |         |         |         |         |         |         |         |         |
| 24            | Title   |         |         |         |         |         |         |         |         |         |         |         |         |
| 25            | Title   |         |         |         |         |         |         |         |         |         |         |         |         |
| 26            | Title   |         |         |         |         |         |         |         |         |         |         |         |         |
| 27            | Title   |         |         |         |         |         |         |         |         |         |         |         |         |

File Sheet Undo Clipboard Analysis Change Import Draw Write Text Export Print Send LA Help

10 Arial

T T A A B I U x<sup>2</sup> x<sub>2</sub>

| Table format: |        | Group A | Group B | Group C | Group D | Group E | Group F | Group G | Group H | Group I | Group J | Group K | Group L |
|---------------|--------|---------|---------|---------|---------|---------|---------|---------|---------|---------|---------|---------|---------|
| Grouped       |        | Donor 1 | Donor 2 | Donor 3 | Title   | Title   | Title   | Title   | Title   | Title   | Title   | Title   | Title   |
|               |        | Y       | Y       | Y       | Y       | Y       | Y       | Y       | Y       | Y       | Y       | Y       | Y       |
| 1             | XO     | 7.18    | 1       | 9.940   |         |         |         |         |         |         |         |         |         |
| 2             | XO+Feb | 1.00    | 1       | 3.885   |         |         |         |         |         |         |         |         |         |
| 3             | Title  |         |         |         |         |         |         |         |         |         |         |         |         |
| 4             | Title  |         |         |         |         |         |         |         |         |         |         |         |         |
| 5             | Title  |         |         |         |         |         |         |         |         |         |         |         |         |
| 6             | Title  |         |         |         |         |         |         |         |         |         |         |         |         |
| 7             | Title  |         |         |         |         |         |         |         |         |         |         |         |         |
| 8             | Title  |         |         |         |         |         |         |         |         |         |         |         |         |
| 9             | Title  |         |         |         |         |         |         |         |         |         |         |         |         |
| 10            | Title  |         |         |         |         |         |         |         |         |         |         |         |         |
| 11            | Title  |         |         |         |         |         |         |         |         |         |         |         |         |
| 12            | Title  |         |         |         |         |         |         |         |         |         |         |         |         |
| 13            | Title  |         |         |         |         |         |         |         |         |         |         |         |         |
| 14            | Title  |         |         |         |         |         |         |         |         |         |         |         |         |
| 15            | Title  |         |         |         |         |         |         |         |         |         |         |         |         |
| 16            | Title  |         |         |         |         |         |         |         |         |         |         |         |         |
| 17            | Title  |         |         |         |         |         |         |         |         |         |         |         |         |
| 18            | Title  |         |         |         |         |         |         |         |         |         |         |         |         |
| 19            | Title  |         |         |         |         |         |         |         |         |         |         |         |         |
| 20            | Title  |         |         |         |         |         |         |         |         |         |         |         |         |
| 21            | Title  |         |         |         |         |         |         |         |         |         |         |         |         |
| 22            | Title  |         |         |         |         |         |         |         |         |         |         |         |         |
| 23            | Title  |         |         |         |         |         |         |         |         |         |         |         |         |
| 24            | Title  |         |         |         |         |         |         |         |         |         |         |         |         |
| 25            | Title  |         |         |         |         |         |         |         |         |         |         |         |         |
| 26            | Title  |         |         |         |         |         |         |         |         |         |         |         |         |
| 27            | Title  |         |         |         |         |         |         |         |         |         |         |         |         |

Search

Data Tables

- TNF
- TNF lines
- IL6
- IL6 lines
- IL10
- IL10 lines
- IL1beta
- IL1beta lines**
- New Data Table...

Info

- Project info 1
- Project info 1
- New Info...

Results

- Transpose of TNF
- Transform of TNF
- RM one-way ANOVA of Trans
- Transpose of IL6
- Transform of IL6
- RM one-way ANOVA of Trans
- Transpose of IL10

Family

- IL1beta lines
- Linear IL1beta lines**

File Sheet Undo Clipboard Analysis Interpret Change Draw Write Text Export Print Send LA Help

10 Arial

Prism8

| Search                                                                                                                                                                                                          |                           | Transpose | A     | B       | C       | D     | E     | F     | G     | H     | I     | J     | K     | L     |
|-----------------------------------------------------------------------------------------------------------------------------------------------------------------------------------------------------------------|---------------------------|-----------|-------|---------|---------|-------|-------|-------|-------|-------|-------|-------|-------|-------|
| ▼ Data Tables >>                                                                                                                                                                                                |                           | Control   | Feb   | XO      | XO+Feb  | Title | Title | Title | Title | Title | Title | Title | Title | Title |
| <ul style="list-style-type: none"> <li>TNF</li> <li>TNF lines</li> <li>IL6</li> <li>IL6 lines</li> <li>IL10</li> <li>IL10 lines</li> <li>IL1beta</li> <li>IL1beta lines</li> <li>+ New Data Table...</li> </ul> |                           | Y         | Y     | Y       | Y       | Y     | Y     | Y     | Y     | Y     | Y     | Y     | Y     | Y     |
| 1                                                                                                                                                                                                               | Donor 1                   | 1.000     | 1.000 | 266.050 | 1.000   |       |       |       |       |       |       |       |       |       |
| 2                                                                                                                                                                                                               | Donor 2                   | 1.000     | 0.216 | 77.128  | 0.312   |       |       |       |       |       |       |       |       |       |
| 3                                                                                                                                                                                                               | Donor 3                   | 1.000     | 0.437 | 378.696 | 108.328 |       |       |       |       |       |       |       |       |       |
| 4                                                                                                                                                                                                               |                           |           |       |         |         |       |       |       |       |       |       |       |       |       |
| 5                                                                                                                                                                                                               |                           |           |       |         |         |       |       |       |       |       |       |       |       |       |
| 6                                                                                                                                                                                                               |                           |           |       |         |         |       |       |       |       |       |       |       |       |       |
| 7                                                                                                                                                                                                               |                           |           |       |         |         |       |       |       |       |       |       |       |       |       |
| ▼ Info >>                                                                                                                                                                                                       |                           |           |       |         |         |       |       |       |       |       |       |       |       |       |
| 8                                                                                                                                                                                                               | Project info 1            |           |       |         |         |       |       |       |       |       |       |       |       |       |
| 9                                                                                                                                                                                                               | Project info 1            |           |       |         |         |       |       |       |       |       |       |       |       |       |
| 10                                                                                                                                                                                                              | + New Info...             |           |       |         |         |       |       |       |       |       |       |       |       |       |
| ▼ Results >>                                                                                                                                                                                                    |                           |           |       |         |         |       |       |       |       |       |       |       |       |       |
| 11                                                                                                                                                                                                              | Transpose of TNF          |           |       |         |         |       |       |       |       |       |       |       |       |       |
| 12                                                                                                                                                                                                              | Transform of TNF          |           |       |         |         |       |       |       |       |       |       |       |       |       |
| 13                                                                                                                                                                                                              | RM one-way ANOVA of Tra   |           |       |         |         |       |       |       |       |       |       |       |       |       |
| 14                                                                                                                                                                                                              | Transpose of IL6          |           |       |         |         |       |       |       |       |       |       |       |       |       |
| 15                                                                                                                                                                                                              | Transform of IL6          |           |       |         |         |       |       |       |       |       |       |       |       |       |
| 16                                                                                                                                                                                                              | RM one-way ANOVA of Trans |           |       |         |         |       |       |       |       |       |       |       |       |       |
| 17                                                                                                                                                                                                              | Transpose of IL10         |           |       |         |         |       |       |       |       |       |       |       |       |       |
| Family >>                                                                                                                                                                                                       |                           |           |       |         |         |       |       |       |       |       |       |       |       |       |
| 18                                                                                                                                                                                                              | TNF                       |           |       |         |         |       |       |       |       |       |       |       |       |       |
| 19                                                                                                                                                                                                              | Transpose                 |           |       |         |         |       |       |       |       |       |       |       |       |       |
| 20                                                                                                                                                                                                              | Transform of TNF          |           |       |         |         |       |       |       |       |       |       |       |       |       |
| 21                                                                                                                                                                                                              | RM one-way ANC            |           |       |         |         |       |       |       |       |       |       |       |       |       |
| 22                                                                                                                                                                                                              |                           |           |       |         |         |       |       |       |       |       |       |       |       |       |
| 23                                                                                                                                                                                                              |                           |           |       |         |         |       |       |       |       |       |       |       |       |       |
| 24                                                                                                                                                                                                              |                           |           |       |         |         |       |       |       |       |       |       |       |       |       |
| 25                                                                                                                                                                                                              |                           |           |       |         |         |       |       |       |       |       |       |       |       |       |
| 26                                                                                                                                                                                                              |                           |           |       |         |         |       |       |       |       |       |       |       |       |       |
| 27                                                                                                                                                                                                              |                           |           |       |         |         |       |       |       |       |       |       |       |       |       |

File Sheet Undo Clipboard Analysis Interpret Change Draw Write Text Export Print Send LA Help

10 Arial

Prism8

| Transform |         | A       | B      | C     | D      | E     | F     | G     | H     | I     | J     | K     | L     |
|-----------|---------|---------|--------|-------|--------|-------|-------|-------|-------|-------|-------|-------|-------|
|           |         | Control | Feb    | XO    | XO+Feb | Title | Title | Title | Title | Title | Title | Title | Title |
|           |         | Y       | Y      | Y     | Y      | Y     | Y     | Y     | Y     | Y     | Y     | Y     | Y     |
| 1         | Donor 1 | 0.000   | 0.000  | 2.425 | 0.000  |       |       |       |       |       |       |       |       |
| 2         | Donor 2 | 0.000   | -0.666 | 1.887 | -0.506 |       |       |       |       |       |       |       |       |
| 3         | Donor 3 | 0.000   | -0.360 | 2.578 | 2.035  |       |       |       |       |       |       |       |       |
| 4         |         |         |        |       |        |       |       |       |       |       |       |       |       |
| 5         |         |         |        |       |        |       |       |       |       |       |       |       |       |
| 6         |         |         |        |       |        |       |       |       |       |       |       |       |       |
| 7         |         |         |        |       |        |       |       |       |       |       |       |       |       |
| 8         |         |         |        |       |        |       |       |       |       |       |       |       |       |
| 9         |         |         |        |       |        |       |       |       |       |       |       |       |       |
| 10        |         |         |        |       |        |       |       |       |       |       |       |       |       |
| 11        |         |         |        |       |        |       |       |       |       |       |       |       |       |
| 12        |         |         |        |       |        |       |       |       |       |       |       |       |       |
| 13        |         |         |        |       |        |       |       |       |       |       |       |       |       |
| 14        |         |         |        |       |        |       |       |       |       |       |       |       |       |
| 15        |         |         |        |       |        |       |       |       |       |       |       |       |       |
| 16        |         |         |        |       |        |       |       |       |       |       |       |       |       |
| 17        |         |         |        |       |        |       |       |       |       |       |       |       |       |
| 18        |         |         |        |       |        |       |       |       |       |       |       |       |       |
| 19        |         |         |        |       |        |       |       |       |       |       |       |       |       |
| 20        |         |         |        |       |        |       |       |       |       |       |       |       |       |
| 21        |         |         |        |       |        |       |       |       |       |       |       |       |       |
| 22        |         |         |        |       |        |       |       |       |       |       |       |       |       |
| 23        |         |         |        |       |        |       |       |       |       |       |       |       |       |
| 24        |         |         |        |       |        |       |       |       |       |       |       |       |       |
| 25        |         |         |        |       |        |       |       |       |       |       |       |       |       |
| 26        |         |         |        |       |        |       |       |       |       |       |       |       |       |
| 27        |         |         |        |       |        |       |       |       |       |       |       |       |       |

File Sheet Undo Clipboard Analysis Interpret Change Draw Write Text Export Print Send LA Help

10 Arial

Prism8

Search ANOVA results Multiple comparisons

- Data Tables
  - TNF
  - TNF lines
  - IL6
  - IL6 lines
  - IL10
  - IL10 lines
  - IL1beta
  - IL1beta lines
  - New Data Table...
- Info
  - Project info 1
  - Project info 1
  - New Info...
- Results
  - Transpose of TNF
  - Transform of TNF
  - RM one-way ANOVA of Tra**
  - Transpose of IL6
  - Transform of IL6
  - RM one-way ANOVA of Trans
  - Transpose of IL10

| RM one-way ANOVA            |                                           |    |        |                          |          |
|-----------------------------|-------------------------------------------|----|--------|--------------------------|----------|
| ANOVA results               |                                           |    |        |                          |          |
| 1                           | Table Analyzed                            |    |        |                          |          |
| 2                           |                                           |    |        |                          |          |
| 3                           | <b>Repeated measures ANOVA summary</b>    |    |        |                          |          |
| 4                           | Assume sphericity?                        |    |        |                          |          |
| 5                           | F                                         |    |        |                          |          |
| 6                           | P value                                   |    |        |                          |          |
| 7                           | P value summary                           |    |        |                          |          |
| 8                           | Statistically significant (P < 0.05)?     |    |        |                          |          |
| 9                           | Geisser-Greenhouse's epsilon              |    |        |                          |          |
| 10                          | R square                                  |    |        |                          |          |
| 11                          |                                           |    |        |                          |          |
| 12                          | <b>Was the matching effective?</b>        |    |        |                          |          |
| 13                          | F                                         |    |        |                          |          |
| 14                          | P value                                   |    |        |                          |          |
| 15                          | P value summary                           |    |        |                          |          |
| 16                          | Is there significant matching (P < 0.05)? |    |        |                          |          |
| 17                          | R square                                  |    |        |                          |          |
| 18                          |                                           |    |        |                          |          |
| ANOVA table                 |                                           | DF | MS     | F (DFn, DFd)             | P value  |
| Treatment (between columns) |                                           | 3  | 4.133  | F (1.101, 2.201) = 9.774 | P=0.0790 |
| Individual (between rows)   |                                           | 2  | 0.7825 | F (2, 6) = 1.850         | P=0.2366 |
| Residual (random)           |                                           | 6  | 0.4229 |                          |          |
| Total                       |                                           | 11 |        |                          |          |
| 24                          |                                           |    |        |                          |          |
| 25                          | <b>Data summary</b>                       |    |        |                          |          |
| 26                          | Number of treatments (columns)            |    |        |                          |          |

File Sheet Undo Clipboard Analysis Interpret Change Draw Write Text Export Print Send LA Help

10 Arial

Prism8

Search ANOVA results Multiple comparisons

- ▼ Data Tables >>
  - TNF
  - TNF lines
  - IL6
  - IL6 lines
  - IL10
  - IL10 lines
  - IL1beta
  - IL1beta lines
  - + New Data Table...
- ▼ Info >>
  - Project info 1
  - Project info 1
  - + New Info...
- ▼ Results >>
  - Transpose of TNF
  - Transform of TNF
  - RM one-way ANOVA of Transform of TNF
  - Transpose of IL6
  - Transform of IL6
  - RM one-way ANOVA of Transform of IL6
  - Transpose of IL10
- Family >>
  - TNF
  - Transpose
  - Transform of TNF
  - RM one-way ANOVA of Transform of TNF

| RM one-way ANOVA     |                             |            |                    |              |             |                  |     |        |    |  |
|----------------------|-----------------------------|------------|--------------------|--------------|-------------|------------------|-----|--------|----|--|
| Multiple comparisons |                             |            |                    |              |             |                  |     |        |    |  |
| 1                    | Number of families          | 1          |                    |              |             |                  |     |        |    |  |
| 2                    | Number of comparisons       | 6          |                    |              |             |                  |     |        |    |  |
| 3                    | Alpha                       | 0.05       |                    |              |             |                  |     |        |    |  |
| 4                    |                             |            |                    |              |             |                  |     |        |    |  |
| 5                    | Tukey's multiple comparison | Mean Diff. | 95.00% CI of diff. | Significant? | Summary     | Adjusted P Value |     |        |    |  |
| 6                    | Control vs. Feb             | 0.3418     | -0.9912 to 1.675   | No           | ns          | 0.4695           | A-B |        |    |  |
| 7                    | Control vs. XO              | -2.297     | -3.749 to -0.8450  | Yes          | *           | 0.0205           | A-C |        |    |  |
| 8                    | Control vs. XO+Feb          | -0.5097    | -5.889 to 4.870    | No           | ns          | 0.9054           | A-D |        |    |  |
| 9                    | Feb vs. XO                  | -2.639     | -3.707 to -1.570   | Yes          | **          | 0.0088           | B-C |        |    |  |
| 10                   | Feb vs. XO+Feb              | -0.8514    | -6.207 to 4.504    | No           | ns          | 0.7244           | B-D |        |    |  |
| 11                   | XO vs. XO+Feb               | 1.787      | -2.522 to 6.096    | No           | ns          | 0.2409           | C-D |        |    |  |
| 12                   |                             |            |                    |              |             |                  |     |        |    |  |
| 13                   | Test details                | Mean 1     | Mean 2             | Mean Diff.   | SE of diff. | n1               | n2  | q      | DF |  |
| 14                   | Control vs. Feb             | 0.000      | -0.3418            | 0.3418       | 0.1924      | 3                | 3   | 2.513  | 2  |  |
| 15                   | Control vs. XO              | 0.000      | 2.297              | -2.297       | 0.2095      | 3                | 3   | 15.50  | 2  |  |
| 16                   | Control vs. XO+Feb          | 0.000      | 0.5097             | -0.5097      | 0.7764      | 3                | 3   | 0.9284 | 2  |  |
| 17                   | Feb vs. XO                  | -0.3418    | 2.297              | -2.639       | 0.1542      | 3                | 3   | 24.21  | 2  |  |
| 18                   | Feb vs. XO+Feb              | -0.3418    | 0.5097             | -0.8514      | 0.7729      | 3                | 3   | 1.558  | 2  |  |
| 19                   | XO vs. XO+Feb               | 2.297      | 0.5097             | 1.787        | 0.6219      | 3                | 3   | 4.064  | 2  |  |
| 20                   |                             |            |                    |              |             |                  |     |        |    |  |
| 21                   |                             |            |                    |              |             |                  |     |        |    |  |
| 22                   |                             |            |                    |              |             |                  |     |        |    |  |
| 23                   |                             |            |                    |              |             |                  |     |        |    |  |
| 24                   |                             |            |                    |              |             |                  |     |        |    |  |
| 25                   |                             |            |                    |              |             |                  |     |        |    |  |
| 26                   |                             |            |                    |              |             |                  |     |        |    |  |



File Sheet Undo Clipboard Analysis Interpret Change Draw Write Text Export Print Send LA Help

10 Arial

Prism 8

| Search                                                                                                                                                                                                               |                           | Transpose | A     | B       | C        | D     | E     | F     | G     | H     | I     | J     | K     | L     |
|----------------------------------------------------------------------------------------------------------------------------------------------------------------------------------------------------------------------|---------------------------|-----------|-------|---------|----------|-------|-------|-------|-------|-------|-------|-------|-------|-------|
| ▼ Data Tables >>                                                                                                                                                                                                     |                           | Control   | Feb   | XO      | XO+Feb   | Title | Title | Title | Title | Title | Title | Title | Title | Title |
| <ul style="list-style-type: none"> <li>TNF</li> <li>TNF lines</li> <li><b>IL6</b></li> <li>IL6 lines</li> <li>IL10</li> <li>IL10 lines</li> <li>IL1beta</li> <li>IL1beta lines</li> <li>New Data Table...</li> </ul> |                           | Y         | Y     | Y       | Y        | Y     | Y     | Y     | Y     | Y     | Y     | Y     | Y     | Y     |
| 1                                                                                                                                                                                                                    | Donor 1                   | 1.000     | 1.000 | 618.890 | 68.520   |       |       |       |       |       |       |       |       |       |
| 2                                                                                                                                                                                                                    | Donor 2                   | 1.000     | 0.869 | 131.299 | 54.183   |       |       |       |       |       |       |       |       |       |
| 3                                                                                                                                                                                                                    | Donor 3                   | 1.000     | 1.000 | 612.270 | 2020.025 |       |       |       |       |       |       |       |       |       |
| 4                                                                                                                                                                                                                    |                           |           |       |         |          |       |       |       |       |       |       |       |       |       |
| 5                                                                                                                                                                                                                    |                           |           |       |         |          |       |       |       |       |       |       |       |       |       |
| 6                                                                                                                                                                                                                    |                           |           |       |         |          |       |       |       |       |       |       |       |       |       |
| 7                                                                                                                                                                                                                    |                           |           |       |         |          |       |       |       |       |       |       |       |       |       |
| ▼ Info >>                                                                                                                                                                                                            |                           |           |       |         |          |       |       |       |       |       |       |       |       |       |
| 8                                                                                                                                                                                                                    | Project info 1            |           |       |         |          |       |       |       |       |       |       |       |       |       |
| 9                                                                                                                                                                                                                    | Project info 1            |           |       |         |          |       |       |       |       |       |       |       |       |       |
| 10                                                                                                                                                                                                                   | New Info...               |           |       |         |          |       |       |       |       |       |       |       |       |       |
| ▼ Results >>                                                                                                                                                                                                         |                           |           |       |         |          |       |       |       |       |       |       |       |       |       |
| 11                                                                                                                                                                                                                   | Transpose of TNF          |           |       |         |          |       |       |       |       |       |       |       |       |       |
| 12                                                                                                                                                                                                                   | Transform of TNF          |           |       |         |          |       |       |       |       |       |       |       |       |       |
| 13                                                                                                                                                                                                                   | RM one-way ANOVA of Trans |           |       |         |          |       |       |       |       |       |       |       |       |       |
| 14                                                                                                                                                                                                                   | <b>Transpose of IL6</b>   |           |       |         |          |       |       |       |       |       |       |       |       |       |
| 15                                                                                                                                                                                                                   | Transform of IL6          |           |       |         |          |       |       |       |       |       |       |       |       |       |
| 16                                                                                                                                                                                                                   | RM one-way ANOVA of Tra   |           |       |         |          |       |       |       |       |       |       |       |       |       |
| 17                                                                                                                                                                                                                   | Transpose of IL10         |           |       |         |          |       |       |       |       |       |       |       |       |       |
| Family >>                                                                                                                                                                                                            |                           |           |       |         |          |       |       |       |       |       |       |       |       |       |
| 18                                                                                                                                                                                                                   | IL6                       |           |       |         |          |       |       |       |       |       |       |       |       |       |
| 19                                                                                                                                                                                                                   | Transpose                 |           |       |         |          |       |       |       |       |       |       |       |       |       |
| 20                                                                                                                                                                                                                   | Transform of IL6          |           |       |         |          |       |       |       |       |       |       |       |       |       |
| 21                                                                                                                                                                                                                   | RM one-way ANC            |           |       |         |          |       |       |       |       |       |       |       |       |       |
| 22                                                                                                                                                                                                                   |                           |           |       |         |          |       |       |       |       |       |       |       |       |       |
| 23                                                                                                                                                                                                                   |                           |           |       |         |          |       |       |       |       |       |       |       |       |       |
| 24                                                                                                                                                                                                                   |                           |           |       |         |          |       |       |       |       |       |       |       |       |       |
| 25                                                                                                                                                                                                                   |                           |           |       |         |          |       |       |       |       |       |       |       |       |       |
| 26                                                                                                                                                                                                                   |                           |           |       |         |          |       |       |       |       |       |       |       |       |       |
| 27                                                                                                                                                                                                                   |                           |           |       |         |          |       |       |       |       |       |       |       |       |       |

File Sheet Undo Clipboard Analysis Interpret Change Draw Write Text Export Print Send LA Help

10 Arial

Export Print Send LA Help

| Transform |         | A       | B      | C     | D      | E     | F     | G     | H     | I     | J     | K     | L     |
|-----------|---------|---------|--------|-------|--------|-------|-------|-------|-------|-------|-------|-------|-------|
|           |         | Control | Feb    | XO    | XO+Feb | Title | Title | Title | Title | Title | Title | Title | Title |
|           |         | Y       | Y      | Y     | Y      | Y     | Y     | Y     | Y     | Y     | Y     | Y     | Y     |
| 1         | Donor 1 | 0.000   | 0.000  | 2.792 | 1.836  |       |       |       |       |       |       |       |       |
| 2         | Donor 2 | 0.000   | -0.061 | 2.118 | 1.734  |       |       |       |       |       |       |       |       |
| 3         | Donor 3 | 0.000   | 0.000  | 2.787 | 3.305  |       |       |       |       |       |       |       |       |
| 4         |         |         |        |       |        |       |       |       |       |       |       |       |       |
| 5         |         |         |        |       |        |       |       |       |       |       |       |       |       |
| 6         |         |         |        |       |        |       |       |       |       |       |       |       |       |
| 7         |         |         |        |       |        |       |       |       |       |       |       |       |       |
| 8         |         |         |        |       |        |       |       |       |       |       |       |       |       |
| 9         |         |         |        |       |        |       |       |       |       |       |       |       |       |
| 10        |         |         |        |       |        |       |       |       |       |       |       |       |       |
| 11        |         |         |        |       |        |       |       |       |       |       |       |       |       |
| 12        |         |         |        |       |        |       |       |       |       |       |       |       |       |
| 13        |         |         |        |       |        |       |       |       |       |       |       |       |       |
| 14        |         |         |        |       |        |       |       |       |       |       |       |       |       |
| 15        |         |         |        |       |        |       |       |       |       |       |       |       |       |
| 16        |         |         |        |       |        |       |       |       |       |       |       |       |       |
| 17        |         |         |        |       |        |       |       |       |       |       |       |       |       |
| 18        |         |         |        |       |        |       |       |       |       |       |       |       |       |
| 19        |         |         |        |       |        |       |       |       |       |       |       |       |       |
| 20        |         |         |        |       |        |       |       |       |       |       |       |       |       |
| 21        |         |         |        |       |        |       |       |       |       |       |       |       |       |
| 22        |         |         |        |       |        |       |       |       |       |       |       |       |       |
| 23        |         |         |        |       |        |       |       |       |       |       |       |       |       |
| 24        |         |         |        |       |        |       |       |       |       |       |       |       |       |
| 25        |         |         |        |       |        |       |       |       |       |       |       |       |       |
| 26        |         |         |        |       |        |       |       |       |       |       |       |       |       |
| 27        |         |         |        |       |        |       |       |       |       |       |       |       |       |

Transform of IL6 Row 1, A: Control

| ANOVA results           |                                           | Multiple comparisons |           |           |                          |                |
|-------------------------|-------------------------------------------|----------------------|-----------|-----------|--------------------------|----------------|
| <b>RM one-way ANOVA</b> |                                           |                      |           |           |                          |                |
| ANOVA results           |                                           |                      |           |           |                          |                |
| 1                       | Table Analyzed                            | Transform of IL6     |           |           |                          |                |
| 2                       |                                           |                      |           |           |                          |                |
| 3                       | <b>Repeated measures ANOVA summary</b>    |                      |           |           |                          |                |
| 4                       | Assume sphericity?                        | No                   |           |           |                          |                |
| 5                       | F                                         | 30.68                |           |           |                          |                |
| 6                       | P value                                   | 0.0170               |           |           |                          |                |
| 7                       | P value summary                           | *                    |           |           |                          |                |
| 8                       | Statistically significant (P < 0.05)?     | Yes                  |           |           |                          |                |
| 9                       | Geisser-Greenhouse's epsilon              | 0.4266               |           |           |                          |                |
| 10                      | R square                                  | 0.9388               |           |           |                          |                |
| 11                      |                                           |                      |           |           |                          |                |
| 12                      | <b>Was the matching effective?</b>        |                      |           |           |                          |                |
| 13                      | F                                         | 1.739                |           |           |                          |                |
| 14                      | P value                                   | 0.2537               |           |           |                          |                |
| 15                      | P value summary                           | ns                   |           |           |                          |                |
| 16                      | Is there significant matching (P < 0.05)? | No                   |           |           |                          |                |
| 17                      | R square                                  | 0.03426              |           |           |                          |                |
| 18                      |                                           |                      |           |           |                          |                |
| 19                      | <b>ANOVA table</b>                        | <b>SS</b>            | <b>DF</b> | <b>MS</b> | <b>F (DFn, DFd)</b>      | <b>P value</b> |
| 20                      | Treatment (between columns)               | 17.96                | 3         | 5.986     | F (1.280, 2.560) = 30.68 | P=0.0170       |
| 21                      | Individual (between rows)                 | 0.6785               | 2         | 0.3393    | F (2, 6) = 1.739         | P=0.2537       |
| 22                      | Residual (random)                         | 1.171                | 6         | 0.1951    |                          |                |
| 23                      | Total                                     | 19.81                | 11        |           |                          |                |
| 24                      |                                           |                      |           |           |                          |                |
| 25                      | <b>Data summary</b>                       |                      |           |           |                          |                |
| 26                      | Number of treatments (columns)            | 4                    |           |           |                          |                |

File Sheet Undo Clipboard Analysis Interpret Change Draw Write Text Export Print Send LA Help

10 Arial

Prism8

Search ANOVA results Multiple comparisons

- Data Tables
  - TNF
  - TNF lines
  - IL6
  - IL6 lines
  - IL10
  - IL10 lines
  - IL1beta
  - IL1beta lines
  - New Data Table...
- Info
  - Project info 1
  - Project info 1
  - New Info...
- Results
  - Transpose of TNF
  - Transform of TNF
  - RM one-way ANOVA of Trans
  - Transpose of IL6
  - Transform of IL6
  - RM one-way ANOVA of Tran
  - Transpose of IL10
- Family
  - IL6
    - Transpose
    - Transform of IL6
    - RM one-way ANOVA

| RM one-way ANOVA     |                        |            |                    |              |             |                  |    |        |     |
|----------------------|------------------------|------------|--------------------|--------------|-------------|------------------|----|--------|-----|
| Multiple comparisons |                        |            |                    |              |             |                  |    |        |     |
| 1                    | Number of families     | 1          |                    |              |             |                  |    |        |     |
| 2                    | Number of comparisons  | 6          |                    |              |             |                  |    |        |     |
| 3                    | Alpha                  | 0.05       |                    |              |             |                  |    |        |     |
| 4                    |                        |            |                    |              |             |                  |    |        |     |
| 5                    | Tukey's multiple compa | Mean Diff. | 95.00% CI of diff. | Significant? | Summary     | Adjusted P Value |    |        |     |
| 6                    | Control vs. Feb        | 0.02041    | -0.1210 to 0.1618  | No           | ns          | 0.7683           |    |        | A-B |
| 7                    | Control vs. XO         | -2.566     | -4.115 to -1.016   | Yes          | *           | 0.0188           |    |        | A-C |
| 8                    | Control vs. XO+Feb     | -2.292     | -5.809 to 1.226    | No           | ns          | 0.1114           |    |        | A-D |
| 9                    | Feb vs. XO             | -2.586     | -3.994 to -1.178   | Yes          | *           | 0.0154           |    |        | B-C |
| 10                   | Feb vs. XO+Feb         | -2.312     | -5.754 to 1.130    | No           | ns          | 0.1053           |    |        | B-D |
| 11                   | XO vs. XO+Feb          | 0.2739     | -2.700 to 3.247    | No           | ns          | 0.9115           |    |        | C-D |
| 12                   |                        |            |                    |              |             |                  |    |        |     |
| 13                   | Test details           | Mean 1     | Mean 2             | Mean Diff.   | SE of diff. | n1               | n2 | q      | DF  |
| 14                   | Control vs. Feb        | 0.000      | -0.02041           | 0.02041      | 0.02041     | 3                | 3  | 1.414  | 2   |
| 15                   | Control vs. XO         | 0.000      | 2.566              | -2.566       | 0.2237      | 3                | 3  | 16.22  | 2   |
| 16                   | Control vs. XO+Feb     | 0.000      | 2.292              | -2.292       | 0.5077      | 3                | 3  | 6.384  | 2   |
| 17                   | Feb vs. XO             | -0.02041   | 2.566              | -2.586       | 0.2033      | 3                | 3  | 17.99  | 2   |
| 18                   | Feb vs. XO+Feb         | -0.02041   | 2.292              | -2.312       | 0.4968      | 3                | 3  | 6.582  | 2   |
| 19                   | XO vs. XO+Feb          | 2.566      | 2.292              | 0.2739       | 0.4291      | 3                | 3  | 0.9027 | 2   |
| 20                   |                        |            |                    |              |             |                  |    |        |     |
| 21                   |                        |            |                    |              |             |                  |    |        |     |
| 22                   |                        |            |                    |              |             |                  |    |        |     |
| 23                   |                        |            |                    |              |             |                  |    |        |     |
| 24                   |                        |            |                    |              |             |                  |    |        |     |
| 25                   |                        |            |                    |              |             |                  |    |        |     |
| 26                   |                        |            |                    |              |             |                  |    |        |     |

File Sheet Undo Clipboard Analysis Interpret Change Draw Write Text Export Print Send LA Help

10 Arial

Prism8

| Search                                                                                                                                                                                                                                                   |         | Transpose | A       | B     | C      | D      | E     | F     | G     | H     | I     | J     | K     | L     |
|----------------------------------------------------------------------------------------------------------------------------------------------------------------------------------------------------------------------------------------------------------|---------|-----------|---------|-------|--------|--------|-------|-------|-------|-------|-------|-------|-------|-------|
| ▼ Data Tables                                                                                                                                                                                                                                            |         |           | Control | Feb   | XO     | XO+Feb | Title | Title | Title | Title | Title | Title | Title | Title |
| <ul style="list-style-type: none"> <li>TNF</li> <li>TNF lines</li> <li>IL6</li> <li>IL6 lines</li> <li><b>IL10</b></li> <li>IL10 lines</li> <li>IL1beta</li> <li>IL1beta lines</li> <li>New Data Table...</li> </ul>                                     |         |           | Y       | Y     | Y      | Y      | Y     | Y     | Y     | Y     | Y     | Y     | Y     | Y     |
| 1                                                                                                                                                                                                                                                        | Donor 1 |           | 1.000   | 1.000 | 9.080  | 1.000  |       |       |       |       |       |       |       |       |
| 2                                                                                                                                                                                                                                                        | Donor 2 |           | 1.000   | 0.645 | 1.710  | 1.032  |       |       |       |       |       |       |       |       |
| 3                                                                                                                                                                                                                                                        | Donor 3 |           | 1.000   | 0.617 | 39.448 | 0.617  |       |       |       |       |       |       |       |       |
| 4                                                                                                                                                                                                                                                        |         |           |         |       |        |        |       |       |       |       |       |       |       |       |
| 5                                                                                                                                                                                                                                                        |         |           |         |       |        |        |       |       |       |       |       |       |       |       |
| 6                                                                                                                                                                                                                                                        |         |           |         |       |        |        |       |       |       |       |       |       |       |       |
| 7                                                                                                                                                                                                                                                        |         |           |         |       |        |        |       |       |       |       |       |       |       |       |
| ▼ Info                                                                                                                                                                                                                                                   |         |           |         |       |        |        |       |       |       |       |       |       |       |       |
| <ul style="list-style-type: none"> <li>Project info 1</li> <li>Project info 1</li> <li>New Info...</li> </ul>                                                                                                                                            |         |           |         |       |        |        |       |       |       |       |       |       |       |       |
| 8                                                                                                                                                                                                                                                        |         |           |         |       |        |        |       |       |       |       |       |       |       |       |
| 9                                                                                                                                                                                                                                                        |         |           |         |       |        |        |       |       |       |       |       |       |       |       |
| 10                                                                                                                                                                                                                                                       |         |           |         |       |        |        |       |       |       |       |       |       |       |       |
| ▼ Results                                                                                                                                                                                                                                                |         |           |         |       |        |        |       |       |       |       |       |       |       |       |
| <ul style="list-style-type: none"> <li>Transpose of TNF</li> <li>Transform of TNF</li> <li>RM one-way ANOVA of Trans</li> <li>Transpose of IL6</li> <li>Transform of IL6</li> <li>RM one-way ANOVA of Trans</li> <li><b>Transpose of IL10</b></li> </ul> |         |           |         |       |        |        |       |       |       |       |       |       |       |       |
| 11                                                                                                                                                                                                                                                       |         |           |         |       |        |        |       |       |       |       |       |       |       |       |
| 12                                                                                                                                                                                                                                                       |         |           |         |       |        |        |       |       |       |       |       |       |       |       |
| 13                                                                                                                                                                                                                                                       |         |           |         |       |        |        |       |       |       |       |       |       |       |       |
| 14                                                                                                                                                                                                                                                       |         |           |         |       |        |        |       |       |       |       |       |       |       |       |
| 15                                                                                                                                                                                                                                                       |         |           |         |       |        |        |       |       |       |       |       |       |       |       |
| 16                                                                                                                                                                                                                                                       |         |           |         |       |        |        |       |       |       |       |       |       |       |       |
| 17                                                                                                                                                                                                                                                       |         |           |         |       |        |        |       |       |       |       |       |       |       |       |
| Family                                                                                                                                                                                                                                                   |         |           |         |       |        |        |       |       |       |       |       |       |       |       |
| <ul style="list-style-type: none"> <li><b>IL10</b></li> <li>Transpose</li> <li>Transform of IL10</li> <li>RM one-way ANOVA of Trans</li> </ul>                                                                                                           |         |           |         |       |        |        |       |       |       |       |       |       |       |       |
| 18                                                                                                                                                                                                                                                       |         |           |         |       |        |        |       |       |       |       |       |       |       |       |
| 19                                                                                                                                                                                                                                                       |         |           |         |       |        |        |       |       |       |       |       |       |       |       |
| 20                                                                                                                                                                                                                                                       |         |           |         |       |        |        |       |       |       |       |       |       |       |       |
| 21                                                                                                                                                                                                                                                       |         |           |         |       |        |        |       |       |       |       |       |       |       |       |
| 22                                                                                                                                                                                                                                                       |         |           |         |       |        |        |       |       |       |       |       |       |       |       |
| 23                                                                                                                                                                                                                                                       |         |           |         |       |        |        |       |       |       |       |       |       |       |       |
| 24                                                                                                                                                                                                                                                       |         |           |         |       |        |        |       |       |       |       |       |       |       |       |
| 25                                                                                                                                                                                                                                                       |         |           |         |       |        |        |       |       |       |       |       |       |       |       |
| 26                                                                                                                                                                                                                                                       |         |           |         |       |        |        |       |       |       |       |       |       |       |       |
| 27                                                                                                                                                                                                                                                       |         |           |         |       |        |        |       |       |       |       |       |       |       |       |

File Sheet Undo Clipboard Analysis Interpret Change Draw Write Text Export Print Send LA Help

10 Arial

Prism8

| Transform |         | A       | B      | C     | D      | E     | F     | G     | H     | I     | J     | K     | L     |
|-----------|---------|---------|--------|-------|--------|-------|-------|-------|-------|-------|-------|-------|-------|
|           |         | Control | Feb    | XO    | XO+Feb | Title | Title | Title | Title | Title | Title | Title | Title |
|           |         | Y       | Y      | Y     | Y      | Y     | Y     | Y     | Y     | Y     | Y     | Y     | Y     |
| 1         | Donor 1 | 0.000   | 0.000  | 0.958 | 0.000  |       |       |       |       |       |       |       |       |
| 2         | Donor 2 | 0.000   | -0.190 | 0.233 | 0.014  |       |       |       |       |       |       |       |       |
| 3         | Donor 3 | 0.000   | -0.210 | 1.596 | -0.210 |       |       |       |       |       |       |       |       |
| 4         |         |         |        |       |        |       |       |       |       |       |       |       |       |
| 5         |         |         |        |       |        |       |       |       |       |       |       |       |       |
| 6         |         |         |        |       |        |       |       |       |       |       |       |       |       |
| 7         |         |         |        |       |        |       |       |       |       |       |       |       |       |
| 8         |         |         |        |       |        |       |       |       |       |       |       |       |       |
| 9         |         |         |        |       |        |       |       |       |       |       |       |       |       |
| 10        |         |         |        |       |        |       |       |       |       |       |       |       |       |
| 11        |         |         |        |       |        |       |       |       |       |       |       |       |       |
| 12        |         |         |        |       |        |       |       |       |       |       |       |       |       |
| 13        |         |         |        |       |        |       |       |       |       |       |       |       |       |
| 14        |         |         |        |       |        |       |       |       |       |       |       |       |       |
| 15        |         |         |        |       |        |       |       |       |       |       |       |       |       |
| 16        |         |         |        |       |        |       |       |       |       |       |       |       |       |
| 17        |         |         |        |       |        |       |       |       |       |       |       |       |       |
| 18        |         |         |        |       |        |       |       |       |       |       |       |       |       |
| 19        |         |         |        |       |        |       |       |       |       |       |       |       |       |
| 20        |         |         |        |       |        |       |       |       |       |       |       |       |       |
| 21        |         |         |        |       |        |       |       |       |       |       |       |       |       |
| 22        |         |         |        |       |        |       |       |       |       |       |       |       |       |
| 23        |         |         |        |       |        |       |       |       |       |       |       |       |       |
| 24        |         |         |        |       |        |       |       |       |       |       |       |       |       |
| 25        |         |         |        |       |        |       |       |       |       |       |       |       |       |
| 26        |         |         |        |       |        |       |       |       |       |       |       |       |       |
| 27        |         |         |        |       |        |       |       |       |       |       |       |       |       |

File Sheet Undo Clipboard Analysis Interpret Change Draw Write Text Export Print Send LA Help

10 Arial

Prism8

Search ANOVA results Multiple comparisons

| RM one-way ANOVA |                                           |                   |           |           |                          |                |
|------------------|-------------------------------------------|-------------------|-----------|-----------|--------------------------|----------------|
| ANOVA results    |                                           |                   |           |           |                          |                |
| 1                | Table Analyzed                            | Transform of IL10 |           |           |                          |                |
| 2                |                                           |                   |           |           |                          |                |
| 3                | <b>Repeated measures ANOVA summary</b>    |                   |           |           |                          |                |
| 4                | Assume sphericity?                        | No                |           |           |                          |                |
| 5                | F                                         | 5.554             |           |           |                          |                |
| 6                | P value                                   | 0.1390            |           |           |                          |                |
| 7                | P value summary                           | ns                |           |           |                          |                |
| 8                | Statistically significant (P < 0.05)?     | No                |           |           |                          |                |
| 9                | Geisser-Greenhouse's epsilon              | 0.3444            |           |           |                          |                |
| 10               | R square                                  | 0.7352            |           |           |                          |                |
| 11               |                                           |                   |           |           |                          |                |
| 12               | <b>Was the matching effective?</b>        |                   |           |           |                          |                |
| 13               | F                                         | 0.6517            |           |           |                          |                |
| 14               | P value                                   | 0.5545            |           |           |                          |                |
| 15               | P value summary                           | ns                |           |           |                          |                |
| 16               | Is there significant matching (P < 0.05)? | No                |           |           |                          |                |
| 17               | R square                                  | 0.05439           |           |           |                          |                |
| 18               |                                           |                   |           |           |                          |                |
| 19               | <b>ANOVA table</b>                        | <b>SS</b>         | <b>DF</b> | <b>MS</b> | <b>F (DFn, DFd)</b>      | <b>P value</b> |
| 20               | Treatment (between columns)               | 2.255             | 3         | 0.7517    | F (1.033, 2.066) = 5.554 | P=0.1390       |
| 21               | Individual (between rows)                 | 0.1764            | 2         | 0.08820   | F (2, 6) = 0.6517        | P=0.5545       |
| 22               | Residual (random)                         | 0.8120            | 6         | 0.1353    |                          |                |
| 23               | Total                                     | 3.243             | 11        |           |                          |                |
| 24               |                                           |                   |           |           |                          |                |
| 25               | <b>Data summary</b>                       |                   |           |           |                          |                |
| 26               | Number of treatments (columns)            | 4                 |           |           |                          |                |

File Sheet Undo Clipboard Analysis Interpret Change Draw Write Text Export Print Send LA Help

10 Arial

Prism8

Search ANOVA results Multiple comparisons

- ▼ Info
  - Project info 1
  - Project info 1
  - New Info...
- ▼ Results
  - Transpose of TNF
  - Transform of TNF
  - RM one-way ANOVA of Trans
  - Transpose of IL6
  - Transform of IL6
  - RM one-way ANOVA of Trans
  - Transpose of IL10
  - Transform of IL10
  - RM one-way ANOVA of Tra**
  - Transpose of IL1beta
  - Transform of IL1beta
  - RM one-way ANOVA of Trans
  - New Analysis...
- ▼ Graphs
  - Linear IL1beta
  - Linear IL6
  - Linear IL10
- Family
  - IL10
    - Transpose
    - Transform of IL10
    - RM one-way ANOVA**

| RM one-way ANOVA     |                               |                   |                           |                     |                    |                         |           |          |           |
|----------------------|-------------------------------|-------------------|---------------------------|---------------------|--------------------|-------------------------|-----------|----------|-----------|
| Multiple comparisons |                               |                   |                           |                     |                    |                         |           |          |           |
| 1                    | Number of families            | 1                 |                           |                     |                    |                         |           |          |           |
| 2                    | Number of comparisons p       | 6                 |                           |                     |                    |                         |           |          |           |
| 3                    | Alpha                         | 0.05              |                           |                     |                    |                         |           |          |           |
| 5                    | <b>Tukey's multiple compa</b> | <b>Mean Diff.</b> | <b>95.00% CI of diff.</b> | <b>Significant?</b> | <b>Summary</b>     | <b>Adjusted P Value</b> |           |          |           |
| 6                    | Control vs. Feb               | 0.1333            | -0.3301 to 0.5966         | No                  | ns                 | 0.4079                  | A-B       |          |           |
| 7                    | Control vs. XO                | -0.9290           | -3.657 to 1.799           | No                  | ns                 | 0.3245                  | A-C       |          |           |
| 8                    | Control vs. XO+Feb            | 0.06524           | -0.4353 to 0.5658         | No                  | ns                 | 0.8096                  | A-D       |          |           |
| 9                    | Feb vs. XO                    | -1.062            | -3.851 to 1.726           | No                  | ns                 | 0.2748                  | B-C       |          |           |
| 10                   | Feb vs. XO+Feb                | -0.06804          | -0.5395 to 0.4034         | No                  | ns                 | 0.7683                  | B-D       |          |           |
| 11                   | XO vs. XO+Feb                 | 0.9942            | -2.181 to 4.170           | No                  | ns                 | 0.3648                  | C-D       |          |           |
| 13                   | <b>Test details</b>           | <b>Mean 1</b>     | <b>Mean 2</b>             | <b>Mean Diff.</b>   | <b>SE of diff.</b> | <b>n1</b>               | <b>n2</b> | <b>q</b> | <b>DF</b> |
| 14                   | Control vs. Feb               | 0.000             | -0.1333                   | 0.1333              | 0.06687            | 3                       | 3         | 2.819    | 2         |
| 15                   | Control vs. XO                | 0.000             | 0.9290                    | -0.9290             | 0.3938             | 3                       | 3         | 3.337    | 2         |
| 16                   | Control vs. XO+Feb            | 0.000             | -0.06524                  | 0.06524             | 0.07225            | 3                       | 3         | 1.277    | 2         |
| 17                   | Feb vs. XO                    | -0.1333           | 0.9290                    | -1.062              | 0.4024             | 3                       | 3         | 3.733    | 2         |
| 18                   | Feb vs. XO+Feb                | -0.1333           | -0.06524                  | -0.06804            | 0.06804            | 3                       | 3         | 1.414    | 2         |
| 19                   | XO vs. XO+Feb                 | 0.9290            | -0.06524                  | 0.9942              | 0.4583             | 3                       | 3         | 3.068    | 2         |
| 20                   |                               |                   |                           |                     |                    |                         |           |          |           |
| 21                   |                               |                   |                           |                     |                    |                         |           |          |           |
| 22                   |                               |                   |                           |                     |                    |                         |           |          |           |
| 23                   |                               |                   |                           |                     |                    |                         |           |          |           |
| 24                   |                               |                   |                           |                     |                    |                         |           |          |           |
| 25                   |                               |                   |                           |                     |                    |                         |           |          |           |
| 26                   |                               |                   |                           |                     |                    |                         |           |          |           |



File Sheet Undo Clipboard Analysis Interpret Change Draw Write Text Export Print Send LA Help

10 Arial

Prism8

| Search |         | Transpose | A     | B     | C      | D     | E     | F     | G     | H     | I     | J     | K     | L     |
|--------|---------|-----------|-------|-------|--------|-------|-------|-------|-------|-------|-------|-------|-------|-------|
|        |         | Control   | Feb   | XO    | XO+Feb | Title | Title | Title | Title | Title | Title | Title | Title | Title |
|        |         | Y         | Y     | Y     | Y      | Y     | Y     | Y     | Y     | Y     | Y     | Y     | Y     | Y     |
| 1      | Donor 1 | 1.000     | 1.000 | 7.180 | 1.000  |       |       |       |       |       |       |       |       |       |
| 2      | Donor 2 | 1.000     | 1.000 | 1.000 | 1.000  |       |       |       |       |       |       |       |       |       |
| 3      | Donor 3 | 1.000     | 1.000 | 9.940 | 3.885  |       |       |       |       |       |       |       |       |       |
| 4      |         |           |       |       |        |       |       |       |       |       |       |       |       |       |
| 5      |         |           |       |       |        |       |       |       |       |       |       |       |       |       |
| 6      |         |           |       |       |        |       |       |       |       |       |       |       |       |       |
| 7      |         |           |       |       |        |       |       |       |       |       |       |       |       |       |
| 8      |         |           |       |       |        |       |       |       |       |       |       |       |       |       |
| 9      |         |           |       |       |        |       |       |       |       |       |       |       |       |       |
| 10     |         |           |       |       |        |       |       |       |       |       |       |       |       |       |
| 11     |         |           |       |       |        |       |       |       |       |       |       |       |       |       |
| 12     |         |           |       |       |        |       |       |       |       |       |       |       |       |       |
| 13     |         |           |       |       |        |       |       |       |       |       |       |       |       |       |
| 14     |         |           |       |       |        |       |       |       |       |       |       |       |       |       |
| 15     |         |           |       |       |        |       |       |       |       |       |       |       |       |       |
| 16     |         |           |       |       |        |       |       |       |       |       |       |       |       |       |
| 17     |         |           |       |       |        |       |       |       |       |       |       |       |       |       |
| 18     |         |           |       |       |        |       |       |       |       |       |       |       |       |       |
| 19     |         |           |       |       |        |       |       |       |       |       |       |       |       |       |
| 20     |         |           |       |       |        |       |       |       |       |       |       |       |       |       |
| 21     |         |           |       |       |        |       |       |       |       |       |       |       |       |       |
| 22     |         |           |       |       |        |       |       |       |       |       |       |       |       |       |
| 23     |         |           |       |       |        |       |       |       |       |       |       |       |       |       |
| 24     |         |           |       |       |        |       |       |       |       |       |       |       |       |       |
| 25     |         |           |       |       |        |       |       |       |       |       |       |       |       |       |
| 26     |         |           |       |       |        |       |       |       |       |       |       |       |       |       |
| 27     |         |           |       |       |        |       |       |       |       |       |       |       |       |       |

File Sheet Undo Clipboard Analysis Interpret Change Draw Write Text Export Print Send LA Help

10 Arial

Prism8

| Transform |         | A       | B     | C     | D      | E     | F     | G     | H     | I     | J     | K     | L     |
|-----------|---------|---------|-------|-------|--------|-------|-------|-------|-------|-------|-------|-------|-------|
|           |         | Control | Feb   | XO    | XO+Feb | Title | Title | Title | Title | Title | Title | Title | Title |
|           |         | Y       | Y     | Y     | Y      | Y     | Y     | Y     | Y     | Y     | Y     | Y     | Y     |
| 1         | Donor 1 | 0.000   | 0.000 | 0.856 | 0.000  |       |       |       |       |       |       |       |       |
| 2         | Donor 2 | 0.000   | 0.000 | 0.000 | 0.000  |       |       |       |       |       |       |       |       |
| 3         | Donor 3 | 0.000   | 0.000 | 0.997 | 0.589  |       |       |       |       |       |       |       |       |
| 4         |         |         |       |       |        |       |       |       |       |       |       |       |       |
| 5         |         |         |       |       |        |       |       |       |       |       |       |       |       |
| 6         |         |         |       |       |        |       |       |       |       |       |       |       |       |
| 7         |         |         |       |       |        |       |       |       |       |       |       |       |       |
| 8         |         |         |       |       |        |       |       |       |       |       |       |       |       |
| 9         |         |         |       |       |        |       |       |       |       |       |       |       |       |
| 10        |         |         |       |       |        |       |       |       |       |       |       |       |       |
| 11        |         |         |       |       |        |       |       |       |       |       |       |       |       |
| 12        |         |         |       |       |        |       |       |       |       |       |       |       |       |
| 13        |         |         |       |       |        |       |       |       |       |       |       |       |       |
| 14        |         |         |       |       |        |       |       |       |       |       |       |       |       |
| 15        |         |         |       |       |        |       |       |       |       |       |       |       |       |
| 16        |         |         |       |       |        |       |       |       |       |       |       |       |       |
| 17        |         |         |       |       |        |       |       |       |       |       |       |       |       |
| 18        |         |         |       |       |        |       |       |       |       |       |       |       |       |
| 19        |         |         |       |       |        |       |       |       |       |       |       |       |       |
| 20        |         |         |       |       |        |       |       |       |       |       |       |       |       |
| 21        |         |         |       |       |        |       |       |       |       |       |       |       |       |
| 22        |         |         |       |       |        |       |       |       |       |       |       |       |       |
| 23        |         |         |       |       |        |       |       |       |       |       |       |       |       |
| 24        |         |         |       |       |        |       |       |       |       |       |       |       |       |
| 25        |         |         |       |       |        |       |       |       |       |       |       |       |       |
| 26        |         |         |       |       |        |       |       |       |       |       |       |       |       |
| 27        |         |         |       |       |        |       |       |       |       |       |       |       |       |

Transform of IL1beta Row 1, A: Control

File Sheet Undo Clipboard Analysis Interpret Change Draw Write Text Export Print Send LA Help

10 Arial

Prism8

Search ANOVA results Multiple comparisons

| RM one-way ANOVA |                                           |                      |           |           |                          |                |
|------------------|-------------------------------------------|----------------------|-----------|-----------|--------------------------|----------------|
| ANOVA results    |                                           |                      |           |           |                          |                |
| 1                | Table Analyzed                            | Transform of IL1beta |           |           |                          |                |
| 2                |                                           |                      |           |           |                          |                |
| 3                | <b>Repeated measures ANOVA summary</b>    |                      |           |           |                          |                |
| 4                | Assume sphericity?                        | No                   |           |           |                          |                |
| 5                | F                                         | 3.062                |           |           |                          |                |
| 6                | P value                                   | 0.1842               |           |           |                          |                |
| 7                | P value summary                           | ns                   |           |           |                          |                |
| 8                | Statistically significant (P < 0.05)?     | No                   |           |           |                          |                |
| 9                | Geisser-Greenhouse's epsilon              | 0.5060               |           |           |                          |                |
| 10               | R square                                  | 0.6049               |           |           |                          |                |
| 11               |                                           |                      |           |           |                          |                |
| 12               | <b>Was the matching effective?</b>        |                      |           |           |                          |                |
| 13               | F                                         | 1.897                |           |           |                          |                |
| 14               | P value                                   | 0.2299               |           |           |                          |                |
| 15               | P value summary                           | ns                   |           |           |                          |                |
| 16               | Is there significant matching (P < 0.05)? | No                   |           |           |                          |                |
| 17               | R square                                  | 0.1999               |           |           |                          |                |
| 18               |                                           |                      |           |           |                          |                |
| 19               | <b>ANOVA table</b>                        | <b>SS</b>            | <b>DF</b> | <b>MS</b> | <b>F (DFn, DFd)</b>      | <b>P value</b> |
| 20               | Treatment (between columns)               | 0.7636               | 3         | 0.2545    | F (1.518, 3.036) = 3.062 | P=0.1842       |
| 21               | Individual (between rows)                 | 0.3154               | 2         | 0.1577    | F (2, 6) = 1.897         | P=0.2299       |
| 22               | Residual (random)                         | 0.4988               | 6         | 0.08313   |                          |                |
| 23               | Total                                     | 1.578                | 11        |           |                          |                |
| 24               |                                           |                      |           |           |                          |                |
| 25               | <b>Data summary</b>                       |                      |           |           |                          |                |
| 26               | Number of treatments (columns)            | 4                    |           |           |                          |                |

File Sheet Undo Clipboard Analysis Interpret Change Draw Write Text Export Print Send LA Help

10 Arial

Prism8

Search ANOVA results Multiple comparisons

- ▼ Info
  - Project info 1
  - Project info 1
  - New Info...
- ▼ Results
  - Transpose of TNF
  - Transform of TNF
  - RM one-way ANOVA of Trans
  - Transpose of IL6
  - Transform of IL6
  - RM one-way ANOVA of Trans
  - Transpose of IL10
  - Transform of IL10
  - RM one-way ANOVA of Trans
  - Transpose of IL1beta
  - Transform of IL1beta
  - RM one-way ANOVA of Tra
  - New Analysis...
- ▼ Graphs
  - Linear IL1beta
  - Linear IL6
  - Linear IL10
- Family
  - IL1beta
    - Transpose
    - Transform of IL1beta
    - RM one-way ANOVA

| RM one-way ANOVA     |                                          |                   |                           |                     |                    |                         |           |          |           |
|----------------------|------------------------------------------|-------------------|---------------------------|---------------------|--------------------|-------------------------|-----------|----------|-----------|
| Multiple comparisons |                                          |                   |                           |                     |                    |                         |           |          |           |
| 1                    | Number of families                       | 1                 |                           |                     |                    |                         |           |          |           |
| 2                    | Number of comparisons per family         | 5                 |                           |                     |                    |                         |           |          |           |
| 3                    | Alpha                                    | 0.05              |                           |                     |                    |                         |           |          |           |
| 4                    |                                          |                   |                           |                     |                    |                         |           |          |           |
| 5                    | <b>Tukey's multiple comparisons test</b> | <b>Mean Diff.</b> | <b>95.00% CI of diff.</b> | <b>Significant?</b> | <b>Summary</b>     | <b>Adjusted P Value</b> |           |          |           |
| 6                    | Control vs. XO                           | -0.6178           | -1.959 to 0.7229          | No                  |                    |                         | A-C       |          |           |
| 7                    | Control vs. XO+Feb                       | -0.1965           | -1.042 to 0.6489          | No                  |                    |                         | A-D       |          |           |
| 8                    | Feb vs. XO                               | -0.6178           | -1.959 to 0.7229          | No                  |                    |                         | B-C       |          |           |
| 9                    | Feb vs. XO+Feb                           | -0.1965           | -1.042 to 0.6489          | No                  |                    |                         | B-D       |          |           |
| 10                   | XO vs. XO+Feb                            | 0.4214            | -0.6424 to 1.485          | No                  |                    |                         | C-D       |          |           |
| 11                   |                                          |                   |                           |                     |                    |                         |           |          |           |
| 12                   | <b>Test details</b>                      | <b>Mean 1</b>     | <b>Mean 2</b>             | <b>Mean Diff.</b>   | <b>SE of diff.</b> | <b>n1</b>               | <b>n2</b> | <b>q</b> | <b>DF</b> |
| 13                   | Control vs. Feb                          | 0.000             | 0.000                     | 0.000               | 0.000              | 3                       | 3         |          |           |
| 14                   | Control vs. XO                           | 0.000             | 0.6178                    | -0.6178             | 0.3116             | 3                       | 3         | 1.983    | 2         |
| 15                   | Control vs. XO+Feb                       | 0.000             | 0.1965                    | -0.1965             | 0.1965             | 3                       | 3         | 1.000    | 2         |
| 16                   | Feb vs. XO                               | 0.000             | 0.6178                    | -0.6178             | 0.3116             | 3                       | 3         | 1.983    | 2         |
| 17                   | Feb vs. XO+Feb                           | 0.000             | 0.1965                    | -0.1965             | 0.1965             | 3                       | 3         | 1.000    | 2         |
| 18                   | XO vs. XO+Feb                            | 0.6178            | 0.1965                    | 0.4214              | 0.2472             | 3                       | 3         | 1.704    | 2         |
| 19                   |                                          |                   |                           |                     |                    |                         |           |          |           |
| 20                   |                                          |                   |                           |                     |                    |                         |           |          |           |
| 21                   |                                          |                   |                           |                     |                    |                         |           |          |           |
| 22                   |                                          |                   |                           |                     |                    |                         |           |          |           |
| 23                   |                                          |                   |                           |                     |                    |                         |           |          |           |
| 24                   |                                          |                   |                           |                     |                    |                         |           |          |           |
| 25                   |                                          |                   |                           |                     |                    |                         |           |          |           |
| 26                   |                                          |                   |                           |                     |                    |                         |           |          |           |

SourceDataforFigure2D — Edited

File Sheet Undo Clipboard Analysis Change Import Draw Write Text Export Print Send LA Help

Prism 8

Search

▼ Data Tables >>

- IL6
- TNF
- + New Data Table...

▼ Info >>

- Project info 1
- Project info 1
- + New Info...

▼ Results >>

- Transpose of IL6
- Ordinary one-way ANOVA of Transpose of IL6
- Transpose of TNF
- Ordinary one-way ANOVA of Transpose of TNF
- + New Analysis...

▼ Graphs >>

- IL6
- TNF
- + New Graph...

Family >>

- IL6
  - Transpose
    - Ordinary one-way ANOVA
  - IL6

|    | Table format: | Group A       | Group B      | Group C | Group D | Group E | Group F | Group G | Group H | Group I | Group J | Group K | Group L | Group M | Gr    |
|----|---------------|---------------|--------------|---------|---------|---------|---------|---------|---------|---------|---------|---------|---------|---------|-------|
|    | Grouped       | Donor 1       | Donor 2      | Donor 3 | Title   | Title   | Title   | Title   | Title   | Title   | Title   | Title   | Title   | Title   | Title |
|    |               | Y             | Y            | Y       | Y       | Y       | Y       | Y       | Y       | Y       | Y       | Y       | Y       | Y       | Y     |
| 1  | Control       | 1.000000000   | 1.000000000  | 1.00    |         |         |         |         |         |         |         |         |         |         |       |
| 2  | I-TG          | 1.000000000   | 0.635294118  | 1.00    |         |         |         |         |         |         |         |         |         |         |       |
| 3  | NAC           | 1.000000000   | 1.000000000  | 1.06    |         |         |         |         |         |         |         |         |         |         |       |
| 4  | XO            | 124.266331700 | 49.111764710 | 217.01  |         |         |         |         |         |         |         |         |         |         |       |
| 5  | XO+I-TG       | 12.547738690  | 3.523529412  | 24.38   |         |         |         |         |         |         |         |         |         |         |       |
| 6  | XO NAC        | 1.090452261   | 1.170588235  | 69.59   |         |         |         |         |         |         |         |         |         |         |       |
| 7  | HI XO         | 10.944723620  | 20.264705880 | 36.90   |         |         |         |         |         |         |         |         |         |         |       |
| 8  | Title         |               |              |         |         |         |         |         |         |         |         |         |         |         |       |
| 9  | Title         |               |              |         |         |         |         |         |         |         |         |         |         |         |       |
| 10 | Title         |               |              |         |         |         |         |         |         |         |         |         |         |         |       |
| 11 | Title         |               |              |         |         |         |         |         |         |         |         |         |         |         |       |
| 12 | Title         |               |              |         |         |         |         |         |         |         |         |         |         |         |       |
| 13 | Title         |               |              |         |         |         |         |         |         |         |         |         |         |         |       |
| 14 | Title         |               |              |         |         |         |         |         |         |         |         |         |         |         |       |
| 15 | Title         |               |              |         |         |         |         |         |         |         |         |         |         |         |       |
| 16 | Title         |               |              |         |         |         |         |         |         |         |         |         |         |         |       |
| 17 | Title         |               |              |         |         |         |         |         |         |         |         |         |         |         |       |
| 18 | Title         |               |              |         |         |         |         |         |         |         |         |         |         |         |       |
| 19 | Title         |               |              |         |         |         |         |         |         |         |         |         |         |         |       |
| 20 | Title         |               |              |         |         |         |         |         |         |         |         |         |         |         |       |
| 21 | Title         |               |              |         |         |         |         |         |         |         |         |         |         |         |       |
| 22 | Title         |               |              |         |         |         |         |         |         |         |         |         |         |         |       |
| 23 | Title         |               |              |         |         |         |         |         |         |         |         |         |         |         |       |
| 24 | Title         |               |              |         |         |         |         |         |         |         |         |         |         |         |       |
| 25 | Title         |               |              |         |         |         |         |         |         |         |         |         |         |         |       |
| 26 | Title         |               |              |         |         |         |         |         |         |         |         |         |         |         |       |
| 27 | Title         |               |              |         |         |         |         |         |         |         |         |         |         |         |       |
| 28 | Title         |               |              |         |         |         |         |         |         |         |         |         |         |         |       |
| 29 | Title         |               |              |         |         |         |         |         |         |         |         |         |         |         |       |
| 30 | Title         |               |              |         |         |         |         |         |         |         |         |         |         |         |       |
| 31 | Title         |               |              |         |         |         |         |         |         |         |         |         |         |         |       |
| 32 | Title         |               |              |         |         |         |         |         |         |         |         |         |         |         |       |
| 33 | Title         |               |              |         |         |         |         |         |         |         |         |         |         |         |       |
| 34 | Title         |               |              |         |         |         |         |         |         |         |         |         |         |         |       |

IL6

Row 8, A: Donor 1

SourceDataforFigure2D — Edited

File Sheet Undo Clipboard Analysis Change Import Draw Write Text Export Print Send LA Help

Prism 8

Search

Table format: Grouped

|    |         | Group A      | Group B      | Group C      | Group D | Group E | Group F | Group G | Group H | Group I | Group J | Group K | Group L | G |
|----|---------|--------------|--------------|--------------|---------|---------|---------|---------|---------|---------|---------|---------|---------|---|
|    |         | Donor 1      | Donor 2      | Donor 3      | Title   | Title   | Title   | Title   | Title   | Title   | Title   | Title   | Title   |   |
|    |         | Y            | Y            | Y            | Y       | Y       | Y       | Y       | Y       | Y       | Y       | Y       | Y       |   |
| 1  | Control | 1.000000000  | 1.000000000  | 1.000000000  |         |         |         |         |         |         |         |         |         |   |
| 2  | I-TG    | 1.000000000  | 1.000000000  | 0.767857143  |         |         |         |         |         |         |         |         |         |   |
| 3  | NAC     | 1.000000000  | 0.581300813  | 1.000000000  |         |         |         |         |         |         |         |         |         |   |
| 4  | XO      | 66.420634920 | 26.963414630 | 47.785714290 |         |         |         |         |         |         |         |         |         |   |
| 5  | XO+I-TG | 6.843915344  | 1.995934959  | 7.827380952  |         |         |         |         |         |         |         |         |         |   |
| 6  | XO NAC  | 1.058201058  | 1.552845528  | 3.702380952  |         |         |         |         |         |         |         |         |         |   |
| 7  | HI XO   | 2.529100529  | 4.418699187  | 11.125000000 |         |         |         |         |         |         |         |         |         |   |
| 8  | Title   |              |              |              |         |         |         |         |         |         |         |         |         |   |
| 9  | Title   |              |              |              |         |         |         |         |         |         |         |         |         |   |
| 10 | Title   |              |              |              |         |         |         |         |         |         |         |         |         |   |
| 11 | Title   |              |              |              |         |         |         |         |         |         |         |         |         |   |
| 12 | Title   |              |              |              |         |         |         |         |         |         |         |         |         |   |
| 13 | Title   |              |              |              |         |         |         |         |         |         |         |         |         |   |
| 14 | Title   |              |              |              |         |         |         |         |         |         |         |         |         |   |
| 15 | Title   |              |              |              |         |         |         |         |         |         |         |         |         |   |
| 16 | Title   |              |              |              |         |         |         |         |         |         |         |         |         |   |
| 17 | Title   |              |              |              |         |         |         |         |         |         |         |         |         |   |
| 18 | Title   |              |              |              |         |         |         |         |         |         |         |         |         |   |
| 19 | Title   |              |              |              |         |         |         |         |         |         |         |         |         |   |
| 20 | Title   |              |              |              |         |         |         |         |         |         |         |         |         |   |
| 21 | Title   |              |              |              |         |         |         |         |         |         |         |         |         |   |
| 22 | Title   |              |              |              |         |         |         |         |         |         |         |         |         |   |
| 23 | Title   |              |              |              |         |         |         |         |         |         |         |         |         |   |
| 24 | Title   |              |              |              |         |         |         |         |         |         |         |         |         |   |
| 25 | Title   |              |              |              |         |         |         |         |         |         |         |         |         |   |
| 26 | Title   |              |              |              |         |         |         |         |         |         |         |         |         |   |
| 27 | Title   |              |              |              |         |         |         |         |         |         |         |         |         |   |
| 28 | Title   |              |              |              |         |         |         |         |         |         |         |         |         |   |
| 29 | Title   |              |              |              |         |         |         |         |         |         |         |         |         |   |
| 30 | Title   |              |              |              |         |         |         |         |         |         |         |         |         |   |
| 31 | Title   |              |              |              |         |         |         |         |         |         |         |         |         |   |
| 32 | Title   |              |              |              |         |         |         |         |         |         |         |         |         |   |
| 33 | Title   |              |              |              |         |         |         |         |         |         |         |         |         |   |
| 34 | Title   |              |              |              |         |         |         |         |         |         |         |         |         |   |

▼ Data Tables

- IL6
- TNF**
- New Data Table...

▼ Info

- Project info 1
- Project info 1
- New Info...

▼ Results

- Transpose of IL6
- Ordinary one-way ANOVA of Transpose of IL6
- Transpose of TNF**
- Ordinary one-way ANOVA of Transpose of TNF
- New Analysis...

▼ Graphs

- IL6
- TNF**
- New Graph...

Family

- TNF**
  - Transpose
    - Ordinary one-way ANOVA
  - TNF

Row 8, A: Donor 1

SourceDataforFigure2D — Edited

File Sheet Undo Clipboard Analysis Interpret Change Draw Write Text Export Print Send LA Help

Prism 8

Search

▼ Data Tables >>

- IL6
- TNF
- + New Data Table...

▼ Info >>

- Project info 1
- Project info 1
- + New Info...

▼ Results >>

- Transpose of IL6
- Ordinary one-way ANOVA of Transpose of IL6
- Transpose of TNF
- Ordinary one-way ANOVA of Transpose of TNF
- + New Analysis...

▼ Graphs >>

- IL6
- TNF
- + New Graph...

Family >>

- IL6
- Transpose
- Ordinary one-way ANOVA

|    |           | A       | B     | C     | D       | E       | F      | G      | H     | I     | J     | K     | L     | M     |
|----|-----------|---------|-------|-------|---------|---------|--------|--------|-------|-------|-------|-------|-------|-------|
|    | Transpose | Control | I-TG  | NAC   | XO      | XO+I-TG | XO NAC | HI XO  | Title | Title | Title | Title | Title | Title |
|    | Y         | Y       | Y     | Y     | Y       | Y       | Y      | Y      | Y     | Y     | Y     | Y     | Y     | Y     |
| 1  | Donor 1   | 1.000   | 1.000 | 1.000 | 124.266 | 12.548  | 1.090  | 10.945 |       |       |       |       |       |       |
| 2  | Donor 2   | 1.000   | 0.635 | 1.000 | 49.112  | 3.524   | 1.171  | 20.265 |       |       |       |       |       |       |
| 3  | Donor 3   | 1.000   | 1.000 | 1.060 | 217.010 | 24.380  | 69.590 | 36.900 |       |       |       |       |       |       |
| 4  |           |         |       |       |         |         |        |        |       |       |       |       |       |       |
| 5  |           |         |       |       |         |         |        |        |       |       |       |       |       |       |
| 6  |           |         |       |       |         |         |        |        |       |       |       |       |       |       |
| 7  |           |         |       |       |         |         |        |        |       |       |       |       |       |       |
| 8  |           |         |       |       |         |         |        |        |       |       |       |       |       |       |
| 9  |           |         |       |       |         |         |        |        |       |       |       |       |       |       |
| 10 |           |         |       |       |         |         |        |        |       |       |       |       |       |       |
| 11 |           |         |       |       |         |         |        |        |       |       |       |       |       |       |
| 12 |           |         |       |       |         |         |        |        |       |       |       |       |       |       |
| 13 |           |         |       |       |         |         |        |        |       |       |       |       |       |       |
| 14 |           |         |       |       |         |         |        |        |       |       |       |       |       |       |
| 15 |           |         |       |       |         |         |        |        |       |       |       |       |       |       |
| 16 |           |         |       |       |         |         |        |        |       |       |       |       |       |       |
| 17 |           |         |       |       |         |         |        |        |       |       |       |       |       |       |
| 18 |           |         |       |       |         |         |        |        |       |       |       |       |       |       |
| 19 |           |         |       |       |         |         |        |        |       |       |       |       |       |       |
| 20 |           |         |       |       |         |         |        |        |       |       |       |       |       |       |
| 21 |           |         |       |       |         |         |        |        |       |       |       |       |       |       |
| 22 |           |         |       |       |         |         |        |        |       |       |       |       |       |       |
| 23 |           |         |       |       |         |         |        |        |       |       |       |       |       |       |
| 24 |           |         |       |       |         |         |        |        |       |       |       |       |       |       |
| 25 |           |         |       |       |         |         |        |        |       |       |       |       |       |       |
| 26 |           |         |       |       |         |         |        |        |       |       |       |       |       |       |
| 27 |           |         |       |       |         |         |        |        |       |       |       |       |       |       |
| 28 |           |         |       |       |         |         |        |        |       |       |       |       |       |       |
| 29 |           |         |       |       |         |         |        |        |       |       |       |       |       |       |
| 30 |           |         |       |       |         |         |        |        |       |       |       |       |       |       |
| 31 |           |         |       |       |         |         |        |        |       |       |       |       |       |       |
| 32 |           |         |       |       |         |         |        |        |       |       |       |       |       |       |
| 33 |           |         |       |       |         |         |        |        |       |       |       |       |       |       |
| 34 |           |         |       |       |         |         |        |        |       |       |       |       |       |       |

Transpose of IL6

Row 1, A: Control

SourceDataforFigure2D — Edited

File Sheet Undo Clipboard Analysis Interpret Change Draw Write Text Export Print Send LA Help

Prism 8

Search ANOVA results Multiple comparisons

▼ Data Tables >>  
 IL6  
 TNF  
 + New Data Table...

▼ Info >>  
 Project info 1  
 Project info 1  
 + New Info...

▼ Results >>  
 Transpose of IL6  
**Ordinary one-way ANOVA of Transpose of IL6**  
 Transpose of TNF  
 Ordinary one-way ANOVA of Transpose of TNF  
 + New Analysis...

▼ Graphs >>  
 IL6  
 TNF  
 + New Graph...

Family >>  
 IL6  
 Transpose  
**Ordinary one-way ANOVA**

| ANOVA results |                                             |                  |    |      |                   |          |
|---------------|---------------------------------------------|------------------|----|------|-------------------|----------|
| 1             | Table Analyzed                              | Transpose of IL6 |    |      |                   |          |
| 2             | Data sets analyzed                          | A-G              |    |      |                   |          |
| 3             |                                             |                  |    |      |                   |          |
| 4             | <b>ANOVA summary</b>                        |                  |    |      |                   |          |
| 5             | F                                           | 4.862            |    |      |                   |          |
| 6             | P value                                     | 0.0116           |    |      |                   |          |
| 7             | P value summary                             | *                |    |      |                   |          |
| 8             | Significant diff. among means (P < 0.05)?   | Yes              |    |      |                   |          |
| 9             | R square                                    | 0.6695           |    |      |                   |          |
| 10            |                                             |                  |    |      |                   |          |
| 11            | <b>Brown-Forsythe test</b>                  |                  |    |      |                   |          |
| 12            | F (DFn, DFd)                                | 2.015 (5, 12)    |    |      |                   |          |
| 13            | P value                                     | 0.1485           |    |      |                   |          |
| 14            | P value summary                             | ns               |    |      |                   |          |
| 15            | Are SDs significantly different (P < 0.05)? | No               |    |      |                   |          |
| 16            |                                             |                  |    |      |                   |          |
| 17            | <b>Bartlett's test</b>                      |                  |    |      |                   |          |
| 18            | Bartlett's statistic (corrected)            |                  |    |      |                   |          |
| 19            | P value                                     |                  |    |      |                   |          |
| 20            | P value summary                             |                  |    |      |                   |          |
| 21            | Are SDs significantly different (P < 0.05)? |                  |    |      |                   |          |
| 22            |                                             |                  |    |      |                   |          |
| 23            | <b>ANOVA table</b>                          |                  |    |      |                   |          |
| 24            | Treatment (between columns)                 | 36133            | 5  | 7227 | F (5, 12) = 4.862 | P=0.0116 |
| 25            | Residual (within columns)                   | 17836            | 12 | 1486 |                   |          |
| 26            | Total                                       | 53968            | 17 |      |                   |          |
| 27            |                                             |                  |    |      |                   |          |
| 28            | <b>Data summary</b>                         |                  |    |      |                   |          |
| 29            | Number of treatments (columns)              | 6                |    |      |                   |          |
| 30            | Number of values (total)                    | 18               |    |      |                   |          |
| 31            |                                             |                  |    |      |                   |          |
| 32            |                                             |                  |    |      |                   |          |
| 33            |                                             |                  |    |      |                   |          |

Ordinary one-way ANOVA of Transpose of IL6 Row 1, Column A



SourceDataforFigure2D — Edited

File Sheet Undo Clipboard Analysis Interpret Change Draw Write Text Export Print Send LA Help

Prism 8

Search ANOVA results Multiple comparisons

▼ Data Tables

- IL6
- TNF
- + New Data Table...

▼ Info

- Project info 1
- Project info 1
- + New Info...

▼ Results

- Transpose of IL6
- Ordinary one-way ANOVA of Transpose of IL6**
- Transpose of TNF
- Ordinary one-way ANOVA of Transpose of TNF
- + New Analysis...

▼ Graphs

- IL6
- TNF
- + New Graph...

Family

- IL6
- Transpose
- Ordinary one-way ANOVA**

|    |                             | Mean Diff. | 95.00% CI of diff. | Significant? | Summary     | Adjusted P Value |     |           |    |
|----|-----------------------------|------------|--------------------|--------------|-------------|------------------|-----|-----------|----|
| 5  | Tukey's multiple comparison |            |                    |              |             |                  |     |           |    |
| 6  | Control vs. NAC             | -0.02000   | -105.8 to 105.7    | No           | ns          | >0.9999          | A-C |           |    |
| 7  | Control vs. XO              | -129.1     | -234.9 to -23.40   | Yes          | *           | 0.0143           | A-D |           |    |
| 8  | Control vs. XO+I-TG         | -12.48     | -118.2 to 93.25    | No           | ns          | 0.9984           | A-E |           |    |
| 9  | Control vs. XO NAC          | -22.95     | -128.7 to 82.78    | No           | ns          | 0.9743           | A-F |           |    |
| 10 | Control vs. HI XO           | -21.70     | -127.4 to 84.03    | No           | ns          | 0.9798           | A-G |           |    |
| 11 | NAC vs. XO                  | -129.1     | -234.8 to -23.38   | Yes          | *           | 0.0143           | C-D |           |    |
| 12 | NAC vs. XO+I-TG             | -12.46     | -118.2 to 93.27    | No           | ns          | 0.9984           | C-E |           |    |
| 13 | NAC vs. XO NAC              | -22.93     | -128.7 to 82.80    | No           | ns          | 0.9744           | C-F |           |    |
| 14 | NAC vs. HI XO               | -21.68     | -127.4 to 84.05    | No           | ns          | 0.9798           | C-G |           |    |
| 15 | XO vs. XO+I-TG              | 116.6      | 10.91 to 222.4     | Yes          | *           | 0.0279           | D-E |           |    |
| 16 | XO vs. XO NAC               | 106.2      | 0.4471 to 211.9    | Yes          | *           | 0.0488           | D-F |           |    |
| 17 | XO vs. HI XO                | 107.4      | 1.694 to 213.2     | Yes          | *           | 0.0457           | D-G |           |    |
| 18 | XO+I-TG vs. XO NAC          | -10.47     | -116.2 to 95.27    | No           | ns          | 0.9993           | E-F |           |    |
| 19 | XO+I-TG vs. HI XO           | -9.219     | -115.0 to 96.51    | No           | ns          | 0.9996           | E-G |           |    |
| 20 | XO NAC vs. HI XO            | 1.247      | -104.5 to 107.0    | No           | ns          | >0.9999          | F-G |           |    |
| 21 |                             |            |                    |              |             |                  |     |           |    |
| 22 | Test details                | Mean 1     | Mean 2             | Mean Diff.   | SE of diff. | n1               | n2  | q         | DF |
| 23 | Control vs. NAC             | 1.000      | 1.020              | -0.02000     | 31.48       | 3                | 3   | 0.0008985 | 12 |
| 24 | Control vs. XO              | 1.000      | 130.1              | -129.1       | 31.48       | 3                | 3   | 5.801     | 12 |
| 25 | Control vs. XO+I-TG         | 1.000      | 13.48              | -12.48       | 31.48       | 3                | 3   | 0.5609    | 12 |
| 26 | Control vs. XO NAC          | 1.000      | 23.95              | -22.95       | 31.48       | 3                | 3   | 1.031     | 12 |
| 27 | Control vs. HI XO           | 1.000      | 22.70              | -21.70       | 31.48       | 3                | 3   | 0.9751    | 12 |
| 28 | NAC vs. XO                  | 1.020      | 130.1              | -129.1       | 31.48       | 3                | 3   | 5.801     | 12 |
| 29 | NAC vs. XO+I-TG             | 1.020      | 13.48              | -12.46       | 31.48       | 3                | 3   | 0.5600    | 12 |
| 30 | NAC vs. XO NAC              | 1.020      | 23.95              | -22.93       | 31.48       | 3                | 3   | 1.030     | 12 |
| 31 | NAC vs. HI XO               | 1.020      | 22.70              | -21.68       | 31.48       | 3                | 3   | 0.9742    | 12 |
| 32 | XO vs. XO+I-TG              | 130.1      | 13.48              | 116.6        | 31.48       | 3                | 3   | 5.241     | 12 |
| 33 | XO vs. XO NAC               | 130.1      | 23.95              | 106.2        | 31.48       | 3                | 3   | 4.770     | 12 |
| 34 | XO vs. HI XO                | 130.1      | 22.70              | 107.4        | 31.48       | 3                | 3   | 4.826     | 12 |
| 35 | XO+I-TG vs. XO NAC          | 13.48      | 23.95              | -10.47       | 31.48       | 3                | 3   | 0.4702    | 12 |
| 36 | XO+I-TG vs. HI XO           | 13.48      | 22.70              | -9.219       | 31.48       | 3                | 3   | 0.4142    | 12 |
| 37 | XO NAC vs. HI XO            | 23.95      | 22.70              | 1.247        | 31.48       | 3                | 3   | 0.05603   | 12 |

Ordinary one-way ANOVA of Transpose of IL6 Row 1, Column A

SourceDataforFigure2D — Edited

File Sheet Undo Clipboard Analysis Interpret Change Draw Write Text Export Print Send LA Help

Prism 8

Search

▼ Data Tables

- IL6
- TNF**
- + New Data Table...

▼ Info

- Project info 1
- Project info 1
- + New Info...

▼ Results

- Transpose of IL6
- Ordinary one-way ANOVA of Transpose of IL6
- Transpose of TNF**
- Ordinary one-way ANOVA of Transpose of TNF
- + New Analysis...

▼ Graphs

- IL6
- TNF
- + New Graph...

Family

- TNF
- Transpose**
- Ordinary one-way ANOVA

|    |         | A       | B     | C     | D      | E       | F      | G      | H     | I     | J     | K     | L     | M     |
|----|---------|---------|-------|-------|--------|---------|--------|--------|-------|-------|-------|-------|-------|-------|
|    |         | Control | I-TG  | NAC   | XO     | XO+I-TG | XO NAC | HI XO  | Title | Title | Title | Title | Title | Title |
|    |         | Y       | Y     | Y     | Y      | Y       | Y      | Y      | Y     | Y     | Y     | Y     | Y     | Y     |
| 1  | Donor 1 | 1.000   | 1.000 | 1.000 | 66.421 | 6.844   | 1.058  | 2.529  |       |       |       |       |       |       |
| 2  | Donor 2 | 1.000   | 1.000 | 0.581 | 26.963 | 1.996   | 1.553  | 4.419  |       |       |       |       |       |       |
| 3  | Donor 3 | 1.000   | 0.768 | 1.000 | 47.786 | 7.827   | 3.702  | 11.125 |       |       |       |       |       |       |
| 4  |         |         |       |       |        |         |        |        |       |       |       |       |       |       |
| 5  |         |         |       |       |        |         |        |        |       |       |       |       |       |       |
| 6  |         |         |       |       |        |         |        |        |       |       |       |       |       |       |
| 7  |         |         |       |       |        |         |        |        |       |       |       |       |       |       |
| 8  |         |         |       |       |        |         |        |        |       |       |       |       |       |       |
| 9  |         |         |       |       |        |         |        |        |       |       |       |       |       |       |
| 10 |         |         |       |       |        |         |        |        |       |       |       |       |       |       |
| 11 |         |         |       |       |        |         |        |        |       |       |       |       |       |       |
| 12 |         |         |       |       |        |         |        |        |       |       |       |       |       |       |
| 13 |         |         |       |       |        |         |        |        |       |       |       |       |       |       |
| 14 |         |         |       |       |        |         |        |        |       |       |       |       |       |       |
| 15 |         |         |       |       |        |         |        |        |       |       |       |       |       |       |
| 16 |         |         |       |       |        |         |        |        |       |       |       |       |       |       |
| 17 |         |         |       |       |        |         |        |        |       |       |       |       |       |       |
| 18 |         |         |       |       |        |         |        |        |       |       |       |       |       |       |
| 19 |         |         |       |       |        |         |        |        |       |       |       |       |       |       |
| 20 |         |         |       |       |        |         |        |        |       |       |       |       |       |       |
| 21 |         |         |       |       |        |         |        |        |       |       |       |       |       |       |
| 22 |         |         |       |       |        |         |        |        |       |       |       |       |       |       |
| 23 |         |         |       |       |        |         |        |        |       |       |       |       |       |       |
| 24 |         |         |       |       |        |         |        |        |       |       |       |       |       |       |
| 25 |         |         |       |       |        |         |        |        |       |       |       |       |       |       |
| 26 |         |         |       |       |        |         |        |        |       |       |       |       |       |       |
| 27 |         |         |       |       |        |         |        |        |       |       |       |       |       |       |
| 28 |         |         |       |       |        |         |        |        |       |       |       |       |       |       |
| 29 |         |         |       |       |        |         |        |        |       |       |       |       |       |       |
| 30 |         |         |       |       |        |         |        |        |       |       |       |       |       |       |
| 31 |         |         |       |       |        |         |        |        |       |       |       |       |       |       |
| 32 |         |         |       |       |        |         |        |        |       |       |       |       |       |       |
| 33 |         |         |       |       |        |         |        |        |       |       |       |       |       |       |
| 34 |         |         |       |       |        |         |        |        |       |       |       |       |       |       |

Transpose of TNF

Row 1, A: Control

SourceDataforFigure2D — Edited

File Sheet Undo Clipboard Analysis Interpret Change Draw Write Text Export Print Send LA Help

Prism 8

Search ANOVA results Multiple comparisons

▼ Data Tables

- IL6
- TNF
- + New Data Table...

▼ Info

- Project info 1
- Project info 1
- + New Info...

▼ Results

- Transpose of IL6
- Ordinary one-way ANOVA of Transpose of IL6
- Transpose of TNF
- Ordinary one-way ANOVA of Transpose of TNF**
- + New Analysis...

▼ Graphs

- IL6
- TNF
- + New Graph...

Family

- TNF
  - Transpose
  - Ordinary one-way ANOVA**

| ANOVA results                 |                                             |                  |    |       |                   |          |
|-------------------------------|---------------------------------------------|------------------|----|-------|-------------------|----------|
| <b>Ordinary one-way ANOVA</b> |                                             |                  |    |       |                   |          |
| ANOVA results                 |                                             |                  |    |       |                   |          |
| 1                             | Table Analyzed                              | Transpose of TNF |    |       |                   |          |
| 2                             | Data sets analyzed                          | A-G              |    |       |                   |          |
| 3                             |                                             |                  |    |       |                   |          |
| 4                             | <b>ANOVA summary</b>                        |                  |    |       |                   |          |
| 5                             | F                                           | 13.95            |    |       |                   |          |
| 6                             | P value                                     | 0.0001           |    |       |                   |          |
| 7                             | P value summary                             | ***              |    |       |                   |          |
| 8                             | Significant diff. among means (P < 0.05)?   | Yes              |    |       |                   |          |
| 9                             | R square                                    | 0.8532           |    |       |                   |          |
| 10                            |                                             |                  |    |       |                   |          |
| 11                            | <b>Brown-Forsythe test</b>                  |                  |    |       |                   |          |
| 12                            | F (DFn, DFd)                                | 3.001 (5, 12)    |    |       |                   |          |
| 13                            | P value                                     | 0.0551           |    |       |                   |          |
| 14                            | P value summary                             | ns               |    |       |                   |          |
| 15                            | Are SDs significantly different (P < 0.05)? | No               |    |       |                   |          |
| 16                            |                                             |                  |    |       |                   |          |
| 17                            | <b>Bartlett's test</b>                      |                  |    |       |                   |          |
| 18                            | Bartlett's statistic (corrected)            |                  |    |       |                   |          |
| 19                            | P value                                     |                  |    |       |                   |          |
| 20                            | P value summary                             |                  |    |       |                   |          |
| 21                            | Are SDs significantly different (P < 0.05)? |                  |    |       |                   |          |
| 22                            |                                             |                  |    |       |                   |          |
| 23                            | <b>ANOVA table</b>                          |                  |    |       |                   |          |
| 24                            | Treatment (between columns)                 | SS               | DF | MS    | F (DFn, DFd)      | P value  |
| 25                            | Residual (within columns)                   | 4903             | 5  | 980.7 | F (5, 12) = 13.95 | P=0.0001 |
| 26                            | Total                                       | 843.6            | 12 | 70.30 |                   |          |
| 27                            |                                             | 5747             | 17 |       |                   |          |
| 28                            | <b>Data summary</b>                         |                  |    |       |                   |          |
| 29                            | Number of treatments (columns)              | 6                |    |       |                   |          |
| 30                            | Number of values (total)                    | 18               |    |       |                   |          |
| 31                            |                                             |                  |    |       |                   |          |
| 32                            |                                             |                  |    |       |                   |          |
| 33                            |                                             |                  |    |       |                   |          |

Ordinary one-way ANOVA of Transpose of TNF Row 11, Column C

SourceDataforFigure2D — Edited

File Sheet Undo Clipboard Analysis Interpret Change Draw Write Text Export Print Send LA Help

Prism 8

Search ANOVA results Multiple comparisons

▼ Data Tables >>

- IL6
- TNF
- + New Data Table...

▼ Info >>

- Project info 1
- Project info 1
- + New Info...

▼ Results >>

- Transpose of IL6
- Ordinary one-way ANOVA of Transpose of IL6
- Transpose of TNF
- Ordinary one-way ANOVA of Transpose of TNF
- + New Analysis...

▼ Graphs >>

- IL6
- TNF
- + New Graph...

Family >>

- TNF
- Transpose
- Ordinary one-way ANOVA

| ANOVA results          |                                  |                     |                    |                         |           |          |           |
|------------------------|----------------------------------|---------------------|--------------------|-------------------------|-----------|----------|-----------|
| Ordinary one-way ANOVA |                                  |                     |                    |                         |           |          |           |
| Multiple comparisons   |                                  |                     |                    |                         |           |          |           |
|                        |                                  |                     |                    |                         |           |          |           |
| 4                      |                                  |                     |                    |                         |           |          |           |
| 5                      | <b>Tukey's multiple comparis</b> | <b>Significant?</b> | <b>Summary</b>     | <b>Adjusted P Value</b> |           |          |           |
| 6                      | Control vs. NAC                  | No                  | ns                 | >0.9999                 | A-C       |          |           |
| 7                      | Control vs. XO                   | Yes                 | ***                | 0.0002                  | A-D       |          |           |
| 8                      | Control vs. XO+I-TG              | No                  | ns                 | 0.9826                  | A-E       |          |           |
| 9                      | Control vs. XO NAC               | No                  | ns                 | >0.9999                 | A-F       |          |           |
| 10                     | Control vs. HI XO                | No                  | ns                 | 0.9736                  | A-G       |          |           |
| 11                     | NAC vs. XO                       | Yes                 | ***                | 0.0002                  | C-D       |          |           |
| 12                     | NAC vs. XO+I-TG                  | No                  | ns                 | 0.9802                  | C-E       |          |           |
| 13                     | NAC vs. XO NAC                   | No                  | ns                 | >0.9999                 | C-F       |          |           |
| 14                     | NAC vs. HI XO                    | No                  | ns                 | 0.9703                  | C-G       |          |           |
| 15                     | XO vs. XO+I-TG                   | Yes                 | ***                | 0.0006                  | D-E       |          |           |
| 16                     | XO vs. XO NAC                    | Yes                 | ***                | 0.0003                  | D-F       |          |           |
| 17                     | XO vs. HI XO                     | Yes                 | ***                | 0.0007                  | D-G       |          |           |
| 18                     | XO+I-TG vs. XO NAC               | No                  | ns                 | 0.9950                  | E-F       |          |           |
| 19                     | XO+I-TG vs. HI XO                | No                  | ns                 | >0.9999                 | E-G       |          |           |
| 20                     | XO NAC vs. HI XO                 | No                  | ns                 | 0.9911                  | F-G       |          |           |
| 21                     |                                  |                     |                    |                         |           |          |           |
| 22                     | <b>Test details</b>              | <b>Mean Diff.</b>   | <b>SE of diff.</b> | <b>n1</b>               | <b>n2</b> | <b>q</b> | <b>DF</b> |
| 23                     | Control vs. NAC                  | 0.1396              | 6.846              | 3                       | 3         | 0.02883  | 12        |
| 24                     | Control vs. XO                   | -46.06              | 6.846              | 3                       | 3         | 9.514    | 12        |
| 25                     | Control vs. XO+I-TG              | -4.556              | 6.846              | 3                       | 3         | 0.9411   | 12        |
| 26                     | Control vs. XO NAC               | -1.104              | 6.846              | 3                       | 3         | 0.2282   | 12        |
| 27                     | Control vs. HI XO                | -5.024              | 6.846              | 3                       | 3         | 1.038    | 12        |
| 28                     | NAC vs. XO                       | -46.20              | 6.846              | 3                       | 3         | 9.543    | 12        |
| 29                     | NAC vs. XO+I-TG                  | -4.695              | 6.846              | 3                       | 3         | 0.9699   | 12        |
| 30                     | NAC vs. XO NAC                   | -1.244              | 6.846              | 3                       | 3         | 0.2570   | 12        |
| 31                     | NAC vs. HI XO                    | -5.164              | 6.846              | 3                       | 3         | 1.067    | 12        |
| 32                     | XO vs. XO+I-TG                   | 41.50               | 6.846              | 3                       | 3         | 8.573    | 12        |
| 33                     | XO vs. XO NAC                    | 44.95               | 6.846              | 3                       | 3         | 9.286    | 12        |
| 34                     | XO vs. HI XO                     | 41.03               | 6.846              | 3                       | 3         | 8.476    | 12        |
| 35                     | XO+I-TG vs. XO NAC               | 3.451               | 6.846              | 3                       | 3         | 0.7130   | 12        |
| 36                     | XO+I-TG vs. HI XO                | -0.4685             | 6.846              | 3                       | 3         | 0.09679  | 12        |

Ordinary one-way ANOVA of Transpose of TNF Row 11, Column C

SourceDataforFigure2E

File Sheet Undo Clipboard Analysis Change Import Draw Write Text Export

11 Arial

Table format: Column

|    |                 | Group A     | Group B     | Group C     | Group D     | Group E     | Group F       | Group G       | Group H |
|----|-----------------|-------------|-------------|-------------|-------------|-------------|---------------|---------------|---------|
|    |                 | Control     | RBC         | iRBC        | RBCL        | iRBCL       | XO            | LPS           | Title   |
|    |                 | Y           | Y           | Y           | Y           | Y           | Y             | Y             | Y       |
| 1  | AC              | 58.25333333 | 35.52666667 | 276.3733333 | 44.12000000 | 402.7700000 | 4283.54000000 | 7938.19666700 |         |
| 2  | JMV             | 18.41666667 | 20.10666667 | 142.2933333 | 16.89333333 | 78.0366667  | 3445.94000000 | 5735.90000000 |         |
| 3  | Maureen SJT     | 11.29000000 |             |             | 21.32000000 | 346.0800000 | 746.65000000  | 1894.32000000 |         |
| 4  | Maureen 2.10.14 | 3.09000000  | 1.97000000  | 30.6100000  |             |             |               | 3037.01000000 |         |
| 5  | Title           |             |             |             |             |             |               |               |         |
| 6  | Title           |             |             |             |             |             |               |               |         |
| 7  | Title           |             |             |             |             |             |               |               |         |
| 8  |                 |             |             |             |             |             |               |               |         |
| 9  | Title           |             |             |             |             |             |               |               |         |
| 10 | Title           |             |             |             |             |             |               |               |         |
| 11 | Title           |             |             |             |             |             |               |               |         |
| 12 | Title           |             |             |             |             |             |               |               |         |
| 13 | Title           |             |             |             |             |             |               |               |         |
| 14 | Title           |             |             |             |             |             |               |               |         |
| 15 | Title           |             |             |             |             |             |               |               |         |
| 16 | Title           |             |             |             |             |             |               |               |         |
| 17 | Title           |             |             |             |             |             |               |               |         |
| 18 | Title           |             |             |             |             |             |               |               |         |
| 19 | Title           |             |             |             |             |             |               |               |         |
| 20 | Title           |             |             |             |             |             |               |               |         |
| 21 | Title           |             |             |             |             |             |               |               |         |
| 22 | Title           |             |             |             |             |             |               |               |         |
| 23 | Title           |             |             |             |             |             |               |               |         |
| 24 | Title           |             |             |             |             |             |               |               |         |
| 25 | Title           |             |             |             |             |             |               |               |         |
| 26 | Title           |             |             |             |             |             |               |               |         |
| 27 | Title           |             |             |             |             |             |               |               |         |
| 28 | Title           |             |             |             |             |             |               |               |         |

Search

Data Tables

- TNF
- IL-6
- IL-10
- IL-1beta
- New Data Table...

Info

- Project info 1
- Project info 1
- New Info...

Results

- Ordinary one-way ANOVA of TNF
- Ordinary one-way ANOVA of IL-6
- Ordinary one-way ANOVA of IL-10
- Ordinary one-way ANOVA of IL-1beta

Family

- TNF
- Ordinary one-way ANOVA
- TNF

Row 8, Column RT

File Sheet Undo Clipboard Analysis Change Import Draw Write Text Export

11 Arial

T T A A B I U x<sup>2</sup> x<sub>2</sub>

Search

▼ Data Tables

- TNF
- IL-6**
- IL-10
- IL-1beta
- + New Data Table...

▼ Info

- Project info 1
- Project info 1
- + New Info...

▼ Results

- Ordinary one-way ANOVA of TNF
- Ordinary one-way ANOVA of IL-6**
- Ordinary one-way ANOVA of IL-10
- Ordinary one-way ANOVA of IL-1beta

Family

- IL-6**
- Ordinary one-way ANOVA
- IL-6

| Table format: |                 | Group A | Group B       | Group C       | Group D       | Group E       | Group F        | Group G        | Group H |
|---------------|-----------------|---------|---------------|---------------|---------------|---------------|----------------|----------------|---------|
| Column        |                 | Control | RBC           | iRBC          | RBCL          | iRBCL         | XO             | LPS            | Title   |
|               |                 | Y       | Y             | Y             | Y             | Y             | Y              | Y              | Y       |
| 1             | AC              | 1062.88 | 1509.20333300 | 3641.64000000 | 1843.27000000 | 7484.75000000 | 12023.14000000 | 12023.14000000 |         |
| 2             | JMV             | 293.58  | 1173.48666700 | 2082.09000000 | 929.23000000  | 2235.72000000 | 12023.14000000 | 12023.14000000 |         |
| 3             | Maureen SJT     | 417.94  |               |               | 1243.53000000 | 2612.26000000 | 6776.59000000  | 7996.04000000  |         |
| 4             | Maureen 2.10.14 | 12.84   | 9.81000000    | 175.36000000  |               |               |                | 13135.71000000 |         |
| 5             | Title           |         |               |               |               |               |                |                |         |
| 6             | Title           |         |               |               |               |               |                |                |         |
| 7             |                 |         |               |               |               |               |                |                |         |
| 8             | Title           |         |               |               |               |               |                |                |         |
| 9             | Title           |         |               |               |               |               |                |                |         |
| 10            | Title           |         |               |               |               |               |                |                |         |
| 11            | Title           |         |               |               |               |               |                |                |         |
| 12            | Title           |         |               |               |               |               |                |                |         |
| 13            | Title           |         |               |               |               |               |                |                |         |
| 14            | Title           |         |               |               |               |               |                |                |         |
| 15            | Title           |         |               |               |               |               |                |                |         |
| 16            | Title           |         |               |               |               |               |                |                |         |
| 17            | Title           |         |               |               |               |               |                |                |         |
| 18            | Title           |         |               |               |               |               |                |                |         |
| 19            | Title           |         |               |               |               |               |                |                |         |
| 20            | Title           |         |               |               |               |               |                |                |         |
| 21            | Title           |         |               |               |               |               |                |                |         |
| 22            | Title           |         |               |               |               |               |                |                |         |
| 23            | Title           |         |               |               |               |               |                |                |         |
| 24            | Title           |         |               |               |               |               |                |                |         |
| 25            | Title           |         |               |               |               |               |                |                |         |
| 26            | Title           |         |               |               |               |               |                |                |         |
| 27            | Title           |         |               |               |               |               |                |                |         |
| 28            | Title           |         |               |               |               |               |                |                |         |

SourceDataforFigure2E

File Sheet Undo Clipboard Analysis Change Import Draw Write Text Export

11 Arial

Table format: Column

|    |                 | Group A     | Group B     | Group C     | Group D     | Group E     | Group F     | Group G     | Group H | Group I |
|----|-----------------|-------------|-------------|-------------|-------------|-------------|-------------|-------------|---------|---------|
|    |                 | Control     | RBC         | iRBC        | RBCL        | iRBCL       | XO          | LPS         | Title   | Title   |
|    |                 | Y           | Y           | Y           | Y           | Y           | Y           | Y           | Y       | Y       |
| 1  | AC              | 2.320000000 | 4.996666667 | 28.90666667 | 4.626666667 | 30.31666667 | 373.1166667 | 650.5733333 |         |         |
| 2  | JMV             | 1.816666667 | 2.593333333 | 8.07000000  | 2.380000000 | 5.253333333 | 160.3200000 | 234.0533333 |         |         |
| 3  | Maureen SJT     | 0.000000000 |             |             | 0.000000000 | 5.290000000 | 13.31000000 | 45.60000000 |         |         |
| 4  | Maureen 2.10.14 | 2.380000000 | 2.480000000 | 7.09000000  |             |             |             | 178.9000000 |         |         |
| 5  | Title           |             |             |             |             |             |             |             |         |         |
| 6  | Title           |             |             |             |             |             |             |             |         |         |
| 7  | Title           |             |             |             |             |             |             |             |         |         |
| 8  | Title           |             |             |             |             |             |             |             |         |         |
| 9  | Title           |             |             |             |             |             |             |             |         |         |
| 10 | Title           |             |             |             |             |             |             |             |         |         |
| 11 | Title           |             |             |             |             |             |             |             |         |         |
| 12 | Title           |             |             |             |             |             |             |             |         |         |
| 13 | Title           |             |             |             |             |             |             |             |         |         |
| 14 | Title           |             |             |             |             |             |             |             |         |         |
| 15 | Title           |             |             |             |             |             |             |             |         |         |
| 16 | Title           |             |             |             |             |             |             |             |         |         |
| 17 | Title           |             |             |             |             |             |             |             |         |         |
| 18 | Title           |             |             |             |             |             |             |             |         |         |
| 19 | Title           |             |             |             |             |             |             |             |         |         |
| 20 | Title           |             |             |             |             |             |             |             |         |         |
| 21 | Title           |             |             |             |             |             |             |             |         |         |
| 22 | Title           |             |             |             |             |             |             |             |         |         |
| 23 | Title           |             |             |             |             |             |             |             |         |         |
| 24 | Title           |             |             |             |             |             |             |             |         |         |
| 25 | Title           |             |             |             |             |             |             |             |         |         |
| 26 | Title           |             |             |             |             |             |             |             |         |         |
| 27 | Title           |             |             |             |             |             |             |             |         |         |
| 28 | Title           |             |             |             |             |             |             |             |         |         |

Search

Data Tables

- TNF
- IL-6
- IL-10**
- IL-1beta
- New Data Table...

Info

- Project info 1
- Project info 1
- New Info...

Results

- Ordinary one-way ANOVA of TNF
- Ordinary one-way ANOVA of IL-6
- Ordinary one-way ANOVA of IL-10**
- Ordinary one-way ANOVA of IL-1beta

Family

- IL-10**
  - Ordinary one-way ANOVA
- IL-10

IL-10

Row 6, A: Control

File Sheet Undo Clipboard Analysis Change Import Draw Write Text Export

11 Arial

T T A A B I U x<sup>2</sup> x<sub>2</sub>

Search

▼ Data Tables

- TNF
- IL-6
- IL-10
- IL-1beta**
- + New Data Table...

▼ Info

- Project info 1
- Project info 1
- + New Info...

▼ Results

- Ordinary one-way ANOVA of TNF
- Ordinary one-way ANOVA of IL-6
- Ordinary one-way ANOVA of IL-10
- Ordinary one-way ANOVA of IL-1beta**

Family

- IL-1beta**
  - Ordinary one-way ANOVA
  - IL-1beta

| Table format: |         | Group A | Group B     | Group C     | Group D     | Group E     | Group F      | Group G     | Group H | Group I |
|---------------|---------|---------|-------------|-------------|-------------|-------------|--------------|-------------|---------|---------|
| Column        |         | Control | RBC         | iRBC        | RBCL        | iRBCL       | XO           | LPS         | Title   | Title   |
|               |         | Y       | Y           | Y           | Y           | Y           | Y            | Y           | Y       | Y       |
| 1             | Donor 1 | 25.36   | 17.27666667 | 140.0366667 | 28.68333333 | 207.9733333 | 3611.6766670 | 6692.296667 |         |         |
| 2             | Donor 2 | 8.26    | 18.57333333 | 111.9833333 | 11.27000000 | 46.5133333  | 5058.5800000 | 6177.983333 |         |         |
| 3             | Donor 3 | 10.95   |             |             | 25.95000000 | 162.4700000 | 1509.9600000 | 4733.830000 |         |         |
| 4             | Donor 4 | 5.02    | 7.71000000  | 11.4100000  |             |             |              | 7641.100000 |         |         |
| 5             | Title   |         |             |             |             |             |              |             |         |         |
| 6             |         |         |             |             |             |             |              |             |         |         |
| 7             | Title   |         |             |             |             |             |              |             |         |         |
| 8             | Title   |         |             |             |             |             |              |             |         |         |
| 9             | Title   |         |             |             |             |             |              |             |         |         |
| 10            | Title   |         |             |             |             |             |              |             |         |         |
| 11            | Title   |         |             |             |             |             |              |             |         |         |
| 12            | Title   |         |             |             |             |             |              |             |         |         |
| 13            | Title   |         |             |             |             |             |              |             |         |         |
| 14            | Title   |         |             |             |             |             |              |             |         |         |
| 15            | Title   |         |             |             |             |             |              |             |         |         |
| 16            | Title   |         |             |             |             |             |              |             |         |         |
| 17            | Title   |         |             |             |             |             |              |             |         |         |
| 18            | Title   |         |             |             |             |             |              |             |         |         |
| 19            | Title   |         |             |             |             |             |              |             |         |         |
| 20            | Title   |         |             |             |             |             |              |             |         |         |
| 21            | Title   |         |             |             |             |             |              |             |         |         |
| 22            | Title   |         |             |             |             |             |              |             |         |         |
| 23            | Title   |         |             |             |             |             |              |             |         |         |
| 24            | Title   |         |             |             |             |             |              |             |         |         |
| 25            | Title   |         |             |             |             |             |              |             |         |         |
| 26            | Title   |         |             |             |             |             |              |             |         |         |
| 27            | Title   |         |             |             |             |             |              |             |         |         |
| 28            | Title   |         |             |             |             |             |              |             |         |         |



File Sheet Undo Clipboard Analysis Interpret Change Draw Write Text Export Print Send LA Help

11 Arial

Prism8

Search ANOVA results Multiple comparisons

▼ Data Tables

- TNF
- IL-6
- IL-10
- IL-1beta
- New Data Table...

▼ Info

- Project info 1
- Project info 1
- New Info...

▼ Results

- Ordinary one-way ANOVA of TNF
- Ordinary one-way ANOVA of IL-6
- Ordinary one-way ANOVA of IL-10
- Ordinary one-way ANOVA of IL-1beta
- New Analysis...

| Ordinary one-way ANOVA |                                             |               |           |           |                     |
|------------------------|---------------------------------------------|---------------|-----------|-----------|---------------------|
| ANOVA results          |                                             |               |           |           |                     |
| 1                      | Table Analyzed                              | TNF           |           |           |                     |
| 2                      | Data sets analyzed                          | A-G           |           |           |                     |
| 3                      |                                             |               |           |           |                     |
| 4                      | <b>ANOVA summary</b>                        |               |           |           |                     |
| 5                      | F                                           | 6.893         |           |           |                     |
| 6                      | P value                                     | 0.0009        |           |           |                     |
| 7                      | P value summary                             | ***           |           |           |                     |
| 8                      | Significant diff. among means (P < 0.05)?   | Yes           |           |           |                     |
| 9                      | R square                                    | 0.7211        |           |           |                     |
| 10                     |                                             |               |           |           |                     |
| 11                     | <b>Brown-Forsythe test</b>                  |               |           |           |                     |
| 12                     | F (DFn, DFd)                                | 5.909 (6, 16) |           |           |                     |
| 13                     | P value                                     | 0.0021        |           |           |                     |
| 14                     | P value summary                             | **            |           |           |                     |
| 15                     | Are SDs significantly different (P < 0.05)? | Yes           |           |           |                     |
| 16                     |                                             |               |           |           |                     |
| 17                     | <b>Bartlett's test</b>                      |               |           |           |                     |
| 18                     | Bartlett's statistic (corrected)            |               |           |           |                     |
| 19                     | P value                                     |               |           |           |                     |
| 20                     | P value summary                             |               |           |           |                     |
| 21                     | Are SDs significantly different (P < 0.05)? |               |           |           |                     |
| 22                     |                                             |               |           |           |                     |
| 23                     | <b>ANOVA table</b>                          | <b>SS</b>     | <b>DF</b> | <b>MS</b> | <b>F (DFn, DFd)</b> |
| 24                     | Treatment (between columns)                 | 75253973      | 6         | 12542329  | F (6, 16) = 6.893   |
| 25                     | Residual (within columns)                   | 29112604      | 16        | 1819538   | P=0.0009            |

SourceDataforFigure2E — Edited

File Sheet Undo Clipboard Analysis Interpret Change Draw Write Text Export Print Send LA Help Prism8

Search ANOVA results Multiple comparisons

▼ Data Tables

- TNF
- IL-6
- IL-10
- IL-1beta
- New Data Table...

▼ Info

- Project info 1
- Project info 1
- New Info...

▼ Results

- Ordinary one-way ANOVA of TNF
- Ordinary one-way ANOVA of IL-6
- Ordinary one-way ANOVA of IL-10
- Ordinary one-way ANOVA of IL-1beta
- New Analysis...

Family

- TNF
- Ordinary one-way ANOVA
- TNF

| Ordinary one-way ANOVA |                                          |                   |                           |                     |                |                         |     |  |  |
|------------------------|------------------------------------------|-------------------|---------------------------|---------------------|----------------|-------------------------|-----|--|--|
| Multiple comparisons   |                                          |                   |                           |                     |                |                         |     |  |  |
| 1                      | Number of families                       | 1                 |                           |                     |                |                         |     |  |  |
| 2                      | Number of comparisons per family         | 21                |                           |                     |                |                         |     |  |  |
| 3                      | Alpha                                    | 0.05              |                           |                     |                |                         |     |  |  |
| 4                      |                                          |                   |                           |                     |                |                         |     |  |  |
| 5                      | <b>Tukey's multiple comparisons test</b> | <b>Mean Diff.</b> | <b>95.00% CI of diff.</b> | <b>Significant?</b> | <b>Summary</b> | <b>Adjusted P Value</b> |     |  |  |
| 6                      | Control vs. RBC                          | 3.561             | -3450 to 3457             | No                  | ns             | >0.9999                 | A-B |  |  |
| 7                      | Control vs. iRBC                         | -127.0            | -3580 to 3326             | No                  | ns             | >0.9999                 | A-C |  |  |
| 8                      | Control vs. RBCL                         | -4.682            | -3458 to 3449             | No                  | ns             | >0.9999                 | A-D |  |  |
| 9                      | Control vs. iRBCL                        | -252.9            | -3706 to 3201             | No                  | ns             | >0.9999                 | A-E |  |  |
| 10                     | Control vs. XO                           | -2803             | -6256 to 650.9            | No                  | ns             | 0.1555                  | A-F |  |  |
| 11                     | Control vs. LPS                          | -4629             | -7826 to -1431            | Yes                 | **             | 0.0027                  | A-G |  |  |
| 12                     | RBC vs. iRBC                             | -130.6            | -3822 to 3561             | No                  | ns             | >0.9999                 | B-C |  |  |
| 13                     | RBC vs. RBCL                             | -8.243            | -3700 to 3684             | No                  | ns             | >0.9999                 | B-D |  |  |
| 14                     | RBC vs. iRBCL                            | -256.4            | -3948 to 3436             | No                  | ns             | >0.9999                 | B-E |  |  |
| 15                     | RBC vs. XO                               | -2806             | -6498 to 885.8            | No                  | ns             | 0.2064                  | B-F |  |  |
| 16                     | RBC vs. LPS                              | -4632             | -8086 to -1179            | Yes                 | **             | 0.0054                  | B-G |  |  |
| 17                     | iRBC vs. RBCL                            | 122.3             | -3570 to 3814             | No                  | ns             | >0.9999                 | C-D |  |  |
| 18                     | iRBC vs. iRBCL                           | -125.9            | -3818 to 3566             | No                  | ns             | >0.9999                 | C-E |  |  |
| 19                     | iRBC vs. XO                              | -2676             | -6368 to 1016             | No                  | ns             | 0.2485                  | C-F |  |  |
| 20                     | iRBC vs. LPS                             | -4502             | -7955 to -1048            | Yes                 | **             | 0.0069                  | C-G |  |  |
| 21                     | RBCL vs. iRBCL                           | -248.2            | -3940 to 3444             | No                  | ns             | >0.9999                 | D-E |  |  |
| 22                     | RBCL vs. XO                              | -2798             | -6490 to 894.0            | No                  | ns             | 0.2089                  | D-F |  |  |
| 23                     | RBCL vs. LPS                             | -4624             | -8077 to -1170            | Yes                 | **             | 0.0055                  | D-G |  |  |
| 24                     | iRBCL vs. XO                             | -2550             | -6242 to 1142             | No                  | ns             | 0.2949                  | E-F |  |  |
| 25                     | iRBCL vs. LPS                            | -4376             | -7829 to -922.2           | Yes                 | **             | 0.0088                  | E-G |  |  |

Ordinary one-way ANOVA of TNF Row 11, Column D

SourceDataforFigure2E — Edited

File Sheet Undo Clipboard Analysis Interpret Change Draw Write Text Export Print Send LA Help Prism8

Search ANOVA results Multiple comparisons

▼ Data Tables

- TNF
- IL-6
- IL-10
- IL-1beta
- New Data Table...

▼ Info

- Project info 1
- Project info 1
- New Info...

▼ Results

- Ordinary one-way ANOVA of TNF
- Ordinary one-way ANOVA of IL-6
- Ordinary one-way ANOVA of IL-10
- Ordinary one-way ANOVA of IL-1beta
- New Analysis...

Family

- TNF
- Ordinary one-way ANOVA
- TNF

| Ordinary one-way ANOVA |                     | Multiple comparisons |                 |                   |                    |           |           |          |           |
|------------------------|---------------------|----------------------|-----------------|-------------------|--------------------|-----------|-----------|----------|-----------|
|                        |                     |                      |                 |                   |                    |           |           |          |           |
| 25                     | iRBCL vs. LPS       | -4376                | -7829 to -922.2 | Yes               | **                 | 0.0088    | E-G       |          |           |
| 26                     | XO vs. LPS          | -1826                | -5279 to 1628   | No                | ns                 | 0.5825    | F-G       |          |           |
| 27                     |                     |                      |                 |                   |                    |           |           |          |           |
| 28                     | <b>Test details</b> | <b>Mean 1</b>        | <b>Mean 2</b>   | <b>Mean Diff.</b> | <b>SE of diff.</b> | <b>n1</b> | <b>n2</b> | <b>q</b> | <b>DF</b> |
| 29                     | Control vs. RBC     | 22.76                | 19.20           | 3.561             | 1030               | 4         | 3         | 0.004889 | 16        |
| 30                     | Control vs. iRBC    | 22.76                | 149.8           | -127.0            | 1030               | 4         | 3         | 0.1743   | 16        |
| 31                     | Control vs. RBCL    | 22.76                | 27.44           | -4.682            | 1030               | 4         | 3         | 0.006427 | 16        |
| 32                     | Control vs. iRBCL   | 22.76                | 275.6           | -252.9            | 1030               | 4         | 3         | 0.3471   | 16        |
| 33                     | Control vs. XO      | 22.76                | 2825            | -2803             | 1030               | 4         | 3         | 3.847    | 16        |
| 34                     | Control vs. LPS     | 22.76                | 4651            | -4629             | 953.8              | 4         | 4         | 6.863    | 16        |
| 35                     | RBC vs. iRBC        | 19.20                | 149.8           | -130.6            | 1101               | 3         | 3         | 0.1676   | 16        |
| 36                     | RBC vs. RBCL        | 19.20                | 27.44           | -8.243            | 1101               | 3         | 3         | 0.01058  | 16        |
| 37                     | RBC vs. iRBCL       | 19.20                | 275.6           | -256.4            | 1101               | 3         | 3         | 0.3293   | 16        |
| 38                     | RBC vs. XO          | 19.20                | 2825            | -2806             | 1101               | 3         | 3         | 3.603    | 16        |
| 39                     | RBC vs. LPS         | 19.20                | 4651            | -4632             | 1030               | 3         | 4         | 6.359    | 16        |
| 40                     | iRBC vs. RBCL       | 149.8                | 27.44           | 122.3             | 1101               | 3         | 3         | 0.1571   | 16        |
| 41                     | iRBC vs. iRBCL      | 149.8                | 275.6           | -125.9            | 1101               | 3         | 3         | 0.1616   | 16        |
| 42                     | iRBC vs. XO         | 149.8                | 2825            | -2676             | 1101               | 3         | 3         | 3.436    | 16        |
| 43                     | iRBC vs. LPS        | 149.8                | 4651            | -4502             | 1030               | 3         | 4         | 6.179    | 16        |
| 44                     | RBCL vs. iRBCL      | 27.44                | 275.6           | -248.2            | 1101               | 3         | 3         | 0.3187   | 16        |
| 45                     | RBCL vs. XO         | 27.44                | 2825            | -2798             | 1101               | 3         | 3         | 3.593    | 16        |
| 46                     | RBCL vs. LPS        | 27.44                | 4651            | -4624             | 1030               | 3         | 4         | 6.347    | 16        |
| 47                     | iRBCL vs. XO        | 275.6                | 2825            | -2550             | 1101               | 3         | 3         | 3.274    | 16        |
| 48                     | iRBCL vs. LPS       | 275.6                | 4651            | -4376             | 1030               | 3         | 4         | 6.007    | 16        |
| 49                     | XO vs. LPS          | 2825                 | 4651            | -1826             | 1030               | 3         | 4         | 2.507    | 16        |

Ordinary one-way ANOVA of TNF Row 11, Column D

File Sheet Undo Clipboard Analysis Interpret Change Draw Write Text Export Print Send LA Help

11 Arial

Prism 8

Search

ANOVA results

Multiple comparisons

Data Tables

- TNF
- IL-6
- IL-10
- IL-1beta
- New Data Table...

Info

- Project info 1
- Project info 1
- New Info...

Results

- Ordinary one-way ANOVA of TNF
- Ordinary one-way ANOVA of IL-6**
- Ordinary one-way ANOVA of IL-10
- Ordinary one-way ANOVA of IL-1beta
- New Analysis...

| Ordinary one-way ANOVA |                                            |                |           |           |                     |                |
|------------------------|--------------------------------------------|----------------|-----------|-----------|---------------------|----------------|
| ANOVA results          |                                            |                |           |           |                     |                |
| 2                      | Data sets analyzed                         | A-G            |           |           |                     |                |
| 3                      |                                            |                |           |           |                     |                |
| 4                      | <b>ANOVA summary</b>                       |                |           |           |                     |                |
| 5                      | F                                          | 19.80          |           |           |                     |                |
| 6                      | P value                                    | <0.0001        |           |           |                     |                |
| 7                      | P value summary                            | ****           |           |           |                     |                |
| 8                      | Significant diff. among means (P < 0.05)   | Yes            |           |           |                     |                |
| 9                      | R square                                   | 0.8813         |           |           |                     |                |
| 10                     |                                            |                |           |           |                     |                |
| 11                     | <b>Brown-Forsythe test</b>                 |                |           |           |                     |                |
| 12                     | F (DFn, DFd)                               | 0.4502 (6, 16) |           |           |                     |                |
| 13                     | P value                                    | 0.8344         |           |           |                     |                |
| 14                     | P value summary                            | ns             |           |           |                     |                |
| 15                     | Are SDs significantly different (P < 0.05) | No             |           |           |                     |                |
| 16                     |                                            |                |           |           |                     |                |
| 17                     | <b>Bartlett's test</b>                     |                |           |           |                     |                |
| 18                     | Bartlett's statistic (corrected)           |                |           |           |                     |                |
| 19                     | P value                                    |                |           |           |                     |                |
| 20                     | P value summary                            |                |           |           |                     |                |
| 21                     | Are SDs significantly different (P < 0.05) |                |           |           |                     |                |
| 22                     |                                            |                |           |           |                     |                |
| 23                     | <b>ANOVA table</b>                         | <b>SS</b>      | <b>DF</b> | <b>MS</b> | <b>F (DFn, DFd)</b> | <b>P value</b> |
| 24                     | Treatment (between columns)                | 439004153      | 6         | 73167359  | F (6, 16) = 19.80   | P<0.0001       |
| 25                     | Residual (within columns)                  | 59117148       | 16        | 3694822   |                     |                |
| 26                     | Total                                      | 498121301      | 22        |           |                     |                |

SourceDataforFigure2E — Edited

File Sheet Undo Clipboard Analysis Interpret Change Draw Write Text Export Print Send LA Help

Prism8

Search ANOVA results Multiple comparisons

▼ Data Tables

- TNF
- IL-6
- IL-10
- IL-1beta
- New Data Table...

▼ Info

- Project info 1
- Project info 1
- New Info...

▼ Results

- Ordinary one-way ANOVA of TNF
- Ordinary one-way ANOVA of IL-6**
- Ordinary one-way ANOVA of IL-10
- Ordinary one-way ANOVA of IL-1beta
- New Analysis...

Family

- IL-6
- Ordinary one-way ANOVA
- IL-6

| Ordinary one-way ANOVA |                                   | Multiple comparisons |              |         |                  |     |
|------------------------|-----------------------------------|----------------------|--------------|---------|------------------|-----|
| 1                      | Number of families                | 1                    |              |         |                  |     |
| 2                      | Number of comparisons             | 21                   |              |         |                  |     |
| 3                      | Alpha                             | 0.05                 |              |         |                  |     |
| 4                      |                                   |                      |              |         |                  |     |
| 5                      | Holm-Sidak's multiple comparisons | Mean Diff.           | Significant? | Summary | Adjusted P Value |     |
| 6                      | Control vs. RBC                   | -450.7               | No           | ns      | 0.9838           | A-B |
| 7                      | Control vs. iRBC                  | -1520                | No           | ns      | 0.9300           | A-C |
| 8                      | Control vs. RBCL                  | -891.9               | No           | ns      | 0.9838           | A-D |
| 9                      | Control vs. iRBCL                 | -3664                | No           | ns      | 0.2334           | A-E |
| 10                     | Control vs. XO                    | -9827                | Yes          | ****    | <0.0001          | A-F |
| 11                     | Control vs. LPS                   | -10848               | Yes          | ****    | <0.0001          | A-G |
| 12                     | RBC vs. iRBC                      | -1069                | No           | ns      | 0.9838           | B-C |
| 13                     | RBC vs. RBCL                      | -441.2               | No           | ns      | 0.9838           | B-D |
| 14                     | RBC vs. iRBCL                     | -3213                | No           | ns      | 0.4463           | B-E |
| 15                     | RBC vs. XO                        | -9377                | Yes          | ***     | 0.0003           | B-F |
| 16                     | RBC vs. LPS                       | -10397               | Yes          | ****    | <0.0001          | B-G |
| 17                     | iRBC vs. RBCL                     | 627.7                | No           | ns      | 0.9838           | C-D |
| 18                     | iRBC vs. iRBCL                    | -2145                | No           | ns      | 0.8160           | C-E |
| 19                     | iRBC vs. XO                       | -8308                | Yes          | **      | 0.0010           | C-F |
| 20                     | iRBC vs. LPS                      | -9328                | Yes          | ***     | 0.0002           | C-G |
| 21                     | RBCL vs. iRBCL                    | -2772                | No           | ns      | 0.5984           | D-E |
| 22                     | RBCL vs. XO                       | -8936                | Yes          | ***     | 0.0005           | D-F |
| 23                     | RBCL vs. LPS                      | -9956                | Yes          | ****    | <0.0001          | D-G |
| 24                     | iRBCL vs. XO                      | -6163                | Yes          | *       | 0.0143           | E-F |
| 25                     | iRBCL vs. LPS                     | -7184                | Yes          | **      | 0.0021           | E-G |

Ordinary one-way ANOVA of IL-6 Row 11, Column C

SourceDataforFigure2E — Edited

File Sheet Undo Clipboard Analysis Interpret Change Draw Write Text Export Print Send LA Help Prism8

Q Search ANOVA results Multiple comparisons

▼ Data Tables

- TNF
- IL-6
- IL-10
- IL-1beta
- New Data Table...

▼ Info

- Project info 1
- Project info 1
- New Info...

▼ Results

- Ordinary one-way ANOVA of TNF
- Ordinary one-way ANOVA of IL-6**
- Ordinary one-way ANOVA of IL-10
- Ordinary one-way ANOVA of IL-1beta
- New Analysis...

Family

- IL-6
- Ordinary one-way ANOVA
- IL-6

| ANOVA results          |                     | Multiple comparisons |               |                   |                    |           |           |          |           |
|------------------------|---------------------|----------------------|---------------|-------------------|--------------------|-----------|-----------|----------|-----------|
| Ordinary one-way ANOVA |                     | Multiple comparisons |               |                   |                    |           |           |          |           |
|                        |                     |                      |               |                   |                    |           |           |          |           |
| 25                     | iRBCL vs. LPS       | -7184                | Yes           | **                | 0.0021             | E-G       |           |          |           |
| 26                     | XO vs. LPS          | -1020                | No            | ns                | 0.9838             | F-G       |           |          |           |
| 27                     |                     |                      |               |                   |                    |           |           |          |           |
| 28                     | <b>Test details</b> | <b>Mean 1</b>        | <b>Mean 2</b> | <b>Mean Diff.</b> | <b>SE of diff.</b> | <b>n1</b> | <b>n2</b> | <b>t</b> | <b>DF</b> |
| 29                     | Control vs. RBC     | 446.8                | 897.5         | -450.7            | 1468               | 4         | 3         | 0.3070   | 16        |
| 30                     | Control vs. iRBC    | 446.8                | 1966          | -1520             | 1468               | 4         | 3         | 1.035    | 16        |
| 31                     | Control vs. RBCL    | 446.8                | 1339          | -891.9            | 1468               | 4         | 3         | 0.6075   | 16        |
| 32                     | Control vs. iRBCL   | 446.8                | 4111          | -3664             | 1468               | 4         | 3         | 2.496    | 16        |
| 33                     | Control vs. XO      | 446.8                | 10274         | -9827             | 1468               | 4         | 3         | 6.694    | 16        |
| 34                     | Control vs. LPS     | 446.8                | 11295         | -10848            | 1359               | 4         | 4         | 7.981    | 16        |
| 35                     | RBC vs. iRBC        | 897.5                | 1966          | -1069             | 1569               | 3         | 3         | 0.6810   | 16        |
| 36                     | RBC vs. RBCL        | 897.5                | 1339          | -441.2            | 1569               | 3         | 3         | 0.2811   | 16        |
| 37                     | RBC vs. iRBCL       | 897.5                | 4111          | -3213             | 1569               | 3         | 3         | 2.047    | 16        |
| 38                     | RBC vs. XO          | 897.5                | 10274         | -9377             | 1569               | 3         | 3         | 5.975    | 16        |
| 39                     | RBC vs. LPS         | 897.5                | 11295         | -10397            | 1468               | 3         | 4         | 7.082    | 16        |
| 40                     | iRBC vs. RBCL       | 1966                 | 1339          | 627.7             | 1569               | 3         | 3         | 0.3999   | 16        |
| 41                     | iRBC vs. iRBCL      | 1966                 | 4111          | -2145             | 1569               | 3         | 3         | 1.366    | 16        |
| 42                     | iRBC vs. XO         | 1966                 | 10274         | -8308             | 1569               | 3         | 3         | 5.293    | 16        |
| 43                     | iRBC vs. LPS        | 1966                 | 11295         | -9328             | 1468               | 3         | 4         | 6.354    | 16        |
| 44                     | RBCL vs. iRBCL      | 1339                 | 4111          | -2772             | 1569               | 3         | 3         | 1.766    | 16        |
| 45                     | RBCL vs. XO         | 1339                 | 10274         | -8936             | 1569               | 3         | 3         | 5.693    | 16        |
| 46                     | RBCL vs. LPS        | 1339                 | 11295         | -9956             | 1468               | 3         | 4         | 6.781    | 16        |
| 47                     | iRBCL vs. XO        | 4111                 | 10274         | -6163             | 1569               | 3         | 3         | 3.927    | 16        |
| 48                     | iRBCL vs. LPS       | 4111                 | 11295         | -7184             | 1468               | 3         | 4         | 4.893    | 16        |
| 49                     | XO vs. LPS          | 10274                | 11295         | -1020             | 1468               | 3         | 4         | 0.6949   | 16        |

Ordinary one-way ANOVA of IL-6 Row 11, Column C

File Sheet Undo Clipboard Analysis Interpret Change Draw Write Text Export Print Send LA Help

11 Arial

Prism8

Search

ANOVA results

Multiple comparisons

▼ Data Tables

- TNF
- IL-6
- IL-10**
- IL-1beta
- New Data Table...

▼ Info

- Project info 1
- Project info 1
- New Info...

▼ Results

- Ordinary one-way ANOVA of TNF
- Ordinary one-way ANOVA of IL-6
- Ordinary one-way ANOVA of IL-10**
- Ordinary one-way ANOVA of IL-1beta
- New Analysis...

| Ordinary one-way ANOVA |                                             |               |           |           |                     |                |
|------------------------|---------------------------------------------|---------------|-----------|-----------|---------------------|----------------|
| ANOVA results          |                                             |               |           |           |                     |                |
| 1                      | Table Analyzed                              | IL-10         |           |           |                     |                |
| 2                      | Data sets analyzed                          | A-G           |           |           |                     |                |
| 3                      |                                             |               |           |           |                     |                |
| 4                      | <b>ANOVA summary</b>                        |               |           |           |                     |                |
| 5                      | F                                           | 2.690         |           |           |                     |                |
| 6                      | P value                                     | 0.0532        |           |           |                     |                |
| 7                      | P value summary                             | ns            |           |           |                     |                |
| 8                      | Significant diff. among means (P < 0.05)?   | No            |           |           |                     |                |
| 9                      | R square                                    | 0.5021        |           |           |                     |                |
| 10                     |                                             |               |           |           |                     |                |
| 11                     | <b>Brown-Forsythe test</b>                  |               |           |           |                     |                |
| 12                     | F (DFn, DFd)                                | 1.942 (6, 16) |           |           |                     |                |
| 13                     | P value                                     | 0.1352        |           |           |                     |                |
| 14                     | P value summary                             | ns            |           |           |                     |                |
| 15                     | Are SDs significantly different (P < 0.05)? | No            |           |           |                     |                |
| 16                     |                                             |               |           |           |                     |                |
| 17                     | <b>Bartlett's test</b>                      |               |           |           |                     |                |
| 18                     | Bartlett's statistic (corrected)            |               |           |           |                     |                |
| 19                     | P value                                     |               |           |           |                     |                |
| 20                     | P value summary                             |               |           |           |                     |                |
| 21                     | Are SDs significantly different (P < 0.05)? |               |           |           |                     |                |
| 22                     |                                             |               |           |           |                     |                |
| 23                     | <b>ANOVA table</b>                          | <b>SS</b>     | <b>DF</b> | <b>MS</b> | <b>F (DFn, DFd)</b> | <b>P value</b> |
| 24                     | Treatment (between columns)                 | 273098        | 6         | 45516     | F (6, 16) = 2.690   | P=0.0532       |
| 25                     | Residual (within columns)                   | 270763        | 16        | 16923     |                     |                |
| 26                     | Total                                       | 543860        | 22        |           |                     |                |
| 27                     |                                             |               |           |           |                     |                |
| 28                     | <b>Data summary</b>                         |               |           |           |                     |                |
| 29                     | Number of treatments (columns)              | 7             |           |           |                     |                |
| 30                     | Number of values (total)                    | 23            |           |           |                     |                |

File Sheet Undo Clipboard Analysis Interpret Change Draw Write Text Export Print Send LA Help

11 Arial

Prism8

Search ANOVA results Multiple comparisons

▼ Data Tables

- TNF
- IL-6
- IL-10**
- IL-1beta
- New Data Table...

▼ Info

- Project info 1
- Project info 1
- New Info...

▼ Results

- Ordinary one-way ANOVA of TNF
- Ordinary one-way ANOVA of IL-6
- Ordinary one-way ANOVA of IL-10**
- Ordinary one-way ANOVA of IL-1beta
- New Analysis...

| Ordinary one-way ANOVA |                                          |                   |                           |                     |                    |                         |           |          |           |
|------------------------|------------------------------------------|-------------------|---------------------------|---------------------|--------------------|-------------------------|-----------|----------|-----------|
| Multiple comparisons   |                                          |                   |                           |                     |                    |                         |           |          |           |
| 1                      | Number of families                       | 1                 |                           |                     |                    |                         |           |          |           |
| 2                      | Number of comparisons per family         | 21                |                           |                     |                    |                         |           |          |           |
| 3                      | Alpha                                    | 0.05              |                           |                     |                    |                         |           |          |           |
| 4                      |                                          |                   |                           |                     |                    |                         |           |          |           |
| 5                      | <b>Tukey's multiple comparisons test</b> | <b>Mean Diff.</b> | <b>95.00% CI of diff.</b> | <b>Significant?</b> | <b>Summary</b>     | <b>Adjusted P Value</b> |           |          |           |
| 6                      | Control vs. RBC                          | -1.727            | -334.8 to 331.3           | No                  | ns                 | >0.9999                 | A-B       |          |           |
| 7                      | Control vs. iRBC                         | -13.06            | -346.1 to 320.0           | No                  | ns                 | >0.9999                 | A-C       |          |           |
| 8                      | Control vs. RBCL                         | -0.7064           | -333.8 to 332.3           | No                  | ns                 | >0.9999                 | A-D       |          |           |
| 9                      | Control vs. iRBCL                        | -11.99            | -345.0 to 321.1           | No                  | ns                 | >0.9999                 | A-E       |          |           |
| 10                     | Control vs. XO                           | -180.6            | -513.7 to 152.4           | No                  | ns                 | 0.5555                  | A-F       |          |           |
| 11                     | Control vs. LPS                          | -275.7            | -584.0 to 32.69           | No                  | ns                 | 0.0962                  | A-G       |          |           |
| 12                     | RBC vs. iRBC                             | -11.33            | -367.4 to 344.7           | No                  | ns                 | >0.9999                 | B-C       |          |           |
| 13                     | RBC vs. RBCL                             | 1.021             | -355.0 to 357.1           | No                  | ns                 | >0.9999                 | B-D       |          |           |
| 14                     | RBC vs. iRBCL                            | -10.26            | -366.3 to 345.8           | No                  | ns                 | >0.9999                 | B-E       |          |           |
| 15                     | RBC vs. XO                               | -178.9            | -534.9 to 177.2           | No                  | ns                 | 0.6348                  | B-F       |          |           |
| 16                     | RBC vs. LPS                              | -273.9            | -607.0 to 59.13           | No                  | ns                 | 0.1462                  | B-G       |          |           |
| 17                     | iRBC vs. RBCL                            | 12.35             | -343.7 to 368.4           | No                  | ns                 | >0.9999                 | C-D       |          |           |
| 18                     | iRBC vs. iRBCL                           | 1.069             | -355.0 to 357.1           | No                  | ns                 | >0.9999                 | C-E       |          |           |
| 19                     | iRBC vs. XO                              | -167.6            | -523.6 to 188.5           | No                  | ns                 | 0.6973                  | C-F       |          |           |
| 20                     | iRBC vs. LPS                             | -262.6            | -595.6 to 70.46           | No                  | ns                 | 0.1769                  | C-G       |          |           |
| 21                     | RBCL vs. iRBCL                           | -11.28            | -367.3 to 344.8           | No                  | ns                 | >0.9999                 | D-E       |          |           |
| 22                     | RBCL vs. XO                              | -179.9            | -536.0 to 176.1           | No                  | ns                 | 0.6291                  | D-F       |          |           |
| 23                     | RBCL vs. LPS                             | -274.9            | -608.0 to 58.11           | No                  | ns                 | 0.1436                  | D-G       |          |           |
| 24                     | iRBCL vs. XO                             | -168.6            | -524.7 to 187.4           | No                  | ns                 | 0.6915                  | E-F       |          |           |
| 25                     | iRBCL vs. LPS                            | -263.7            | -596.7 to 69.39           | No                  | ns                 | 0.1738                  | E-G       |          |           |
| 26                     | XO vs. LPS                               | -95.03            | -428.1 to 238.0           | No                  | ns                 | 0.9565                  | F-G       |          |           |
| 27                     |                                          |                   |                           |                     |                    |                         |           |          |           |
| 28                     | <b>Test details</b>                      | <b>Mean 1</b>     | <b>Mean 2</b>             | <b>Mean Diff.</b>   | <b>SE of diff.</b> | <b>n1</b>               | <b>n2</b> | <b>q</b> | <b>DF</b> |
| 29                     | Control vs. RBC                          | 1.629             | 3.357                     | -1.727              | 99.36              | 4                       | 3         | 0.02459  | 16        |
| 30                     | Control vs. iRBC                         | 1.629             | 14.69                     | -13.06              | 99.36              | 4                       | 3         | 0.1859   | 16        |



SourceDataforFigure2E — Edited

File Sheet Undo Clipboard Analysis Interpret Change Draw Write Text Export Print Send LA Help Prism8

Search ANOVA results Multiple comparisons

▼ Data Tables

- TNF
- IL-6
- IL-10**
- IL-1beta
- New Data Table...

▼ Info

- Project info 1
- Project info 1
- New Info...

▼ Results

- Ordinary one-way ANOVA of TNF
- Ordinary one-way ANOVA of IL-6
- Ordinary one-way ANOVA of IL-10**
- Ordinary one-way ANOVA of IL-1beta
- New Analysis...

Family

- IL-10
- Ordinary one-way ANOVA

| Ordinary one-way ANOVA |                     | Multiple comparisons |                 |            |             |        |     |         |    |
|------------------------|---------------------|----------------------|-----------------|------------|-------------|--------|-----|---------|----|
|                        |                     | Mean 1               | Mean 2          | Mean Diff. | SE of diff. | n1     | n2  | q       | DF |
| 25                     | iRBCL vs. LPS       | -263.7               | -596.7 to 69.39 | No         | ns          | 0.1738 | E-G |         |    |
| 26                     | XO vs. LPS          | -95.03               | -428.1 to 238.0 | No         | ns          | 0.9565 | F-G |         |    |
| 27                     |                     |                      |                 |            |             |        |     |         |    |
| 28                     | <b>Test details</b> |                      |                 |            |             |        |     |         |    |
| 29                     | Control vs. RBC     | 1.629                | 3.357           | -1.727     | 99.36       | 4      | 3   | 0.02459 | 16 |
| 30                     | Control vs. iRBC    | 1.629                | 14.69           | -13.06     | 99.36       | 4      | 3   | 0.1859  | 16 |
| 31                     | Control vs. RBCL    | 1.629                | 2.336           | -0.7064    | 99.36       | 4      | 3   | 0.01005 | 16 |
| 32                     | Control vs. iRBCL   | 1.629                | 13.62           | -11.99     | 99.36       | 4      | 3   | 0.1707  | 16 |
| 33                     | Control vs. XO      | 1.629                | 182.2           | -180.6     | 99.36       | 4      | 3   | 2.571   | 16 |
| 34                     | Control vs. LPS     | 1.629                | 277.3           | -275.7     | 91.99       | 4      | 4   | 4.238   | 16 |
| 35                     | RBC vs. iRBC        | 3.357                | 14.69           | -11.33     | 106.2       | 3      | 3   | 0.1509  | 16 |
| 36                     | RBC vs. RBCL        | 3.357                | 2.336           | 1.021      | 106.2       | 3      | 3   | 0.01360 | 16 |
| 37                     | RBC vs. iRBCL       | 3.357                | 13.62           | -10.26     | 106.2       | 3      | 3   | 0.1367  | 16 |
| 38                     | RBC vs. XO          | 3.357                | 182.2           | -178.9     | 106.2       | 3      | 3   | 2.382   | 16 |
| 39                     | RBC vs. LPS         | 3.357                | 277.3           | -273.9     | 99.36       | 3      | 4   | 3.899   | 16 |
| 40                     | iRBC vs. RBCL       | 14.69                | 2.336           | 12.35      | 106.2       | 3      | 3   | 0.1645  | 16 |
| 41                     | iRBC vs. iRBCL      | 14.69                | 13.62           | 1.069      | 106.2       | 3      | 3   | 0.01423 | 16 |
| 42                     | iRBC vs. XO         | 14.69                | 182.2           | -167.6     | 106.2       | 3      | 3   | 2.231   | 16 |
| 43                     | iRBC vs. LPS        | 14.69                | 277.3           | -262.6     | 99.36       | 3      | 4   | 3.738   | 16 |
| 44                     | RBCL vs. iRBCL      | 2.336                | 13.62           | -11.28     | 106.2       | 3      | 3   | 0.1502  | 16 |
| 45                     | RBCL vs. XO         | 2.336                | 182.2           | -179.9     | 106.2       | 3      | 3   | 2.395   | 16 |
| 46                     | RBCL vs. LPS        | 2.336                | 277.3           | -274.9     | 99.36       | 3      | 4   | 3.914   | 16 |
| 47                     | iRBCL vs. XO        | 13.62                | 182.2           | -168.6     | 106.2       | 3      | 3   | 2.245   | 16 |
| 48                     | iRBCL vs. LPS       | 13.62                | 277.3           | -263.7     | 99.36       | 3      | 4   | 3.753   | 16 |
| 49                     | XO vs. LPS          | 182.2                | 277.3           | -95.03     | 99.36       | 3      | 4   | 1.353   | 16 |
| 50                     |                     |                      |                 |            |             |        |     |         |    |
| 51                     |                     |                      |                 |            |             |        |     |         |    |
| 52                     |                     |                      |                 |            |             |        |     |         |    |
| 53                     |                     |                      |                 |            |             |        |     |         |    |
| 54                     |                     |                      |                 |            |             |        |     |         |    |

Ordinary one-way ANOVA of IL-10 Row 1, Column A

File Sheet Undo Clipboard Analysis Interpret Change Draw Write Text Export Print Send LA Help

11 Arial

Prism8

Search ANOVA results Multiple comparisons

▼ Data Tables

- TNF
- IL-6
- IL-10
- IL-1beta
- + New Data Table...

▼ Info

- Project info 1
- Project info 1
- + New Info...

▼ Results

- Ordinary one-way ANOVA of TNF
- Ordinary one-way ANOVA of IL-6
- Ordinary one-way ANOVA of IL-10
- Ordinary one-way ANOVA of IL-1beta**
- + New Analysis...

| Ordinary one-way ANOVA |                                             |               |           |           |                     |                |
|------------------------|---------------------------------------------|---------------|-----------|-----------|---------------------|----------------|
| ANOVA results          |                                             |               |           |           |                     |                |
| 1                      | Table Analyzed                              | IL-1beta      |           |           |                     |                |
| 2                      | Data sets analyzed                          | A-G           |           |           |                     |                |
| 3                      |                                             |               |           |           |                     |                |
| 4                      | <b>ANOVA summary</b>                        |               |           |           |                     |                |
| 5                      | F                                           | 33.74         |           |           |                     |                |
| 6                      | P value                                     | <0.0001       |           |           |                     |                |
| 7                      | P value summary                             | ****          |           |           |                     |                |
| 8                      | Significant diff. among means (P < 0.05)?   | Yes           |           |           |                     |                |
| 9                      | R square                                    | 0.9267        |           |           |                     |                |
| 10                     |                                             |               |           |           |                     |                |
| 11                     | <b>Brown-Forsythe test</b>                  |               |           |           |                     |                |
| 12                     | F (DFn, DFd)                                | 3.309 (6, 16) |           |           |                     |                |
| 13                     | P value                                     | 0.0259        |           |           |                     |                |
| 14                     | P value summary                             | *             |           |           |                     |                |
| 15                     | Are SDs significantly different (P < 0.05)? | Yes           |           |           |                     |                |
| 16                     |                                             |               |           |           |                     |                |
| 17                     | <b>Bartlett's test</b>                      |               |           |           |                     |                |
| 18                     | Bartlett's statistic (corrected)            |               |           |           |                     |                |
| 19                     | P value                                     |               |           |           |                     |                |
| 20                     | P value summary                             |               |           |           |                     |                |
| 21                     | Are SDs significantly different (P < 0.05)? |               |           |           |                     |                |
| 22                     |                                             |               |           |           |                     |                |
| 23                     | <b>ANOVA table</b>                          | <b>SS</b>     | <b>DF</b> | <b>MS</b> | <b>F (DFn, DFd)</b> | <b>P value</b> |
| 24                     | Treatment (between columns)                 | 136779514     | 6         | 22796586  | F (6, 16) = 33.74   | P<0.0001       |
| 25                     | Residual (within columns)                   | 10811025      | 16        | 675689    |                     |                |
| 26                     | Total                                       | 147590540     | 22        |           |                     |                |
| 27                     |                                             |               |           |           |                     |                |
| 28                     | <b>Data summary</b>                         |               |           |           |                     |                |
| 29                     | Number of treatments (columns)              | 7             |           |           |                     |                |
| 30                     | Number of values (total)                    | 23            |           |           |                     |                |

Ordinary one-way ANOVA of IL-1beta Row 11, Column D

SourceDataforFigure2E — Edited

File Sheet Undo Clipboard Analysis Interpret Change Draw Write Text Export Print Send LA Help Prism 8

Search ANOVA results Multiple comparisons

▼ Data Tables

- TNF
- IL-6
- IL-10
- IL-1beta
- New Data Table...

▼ Info

- Project info 1
- Project info 1
- New Info...

▼ Results

- Ordinary one-way ANOVA of TNF
- Ordinary one-way ANOVA of IL-6
- Ordinary one-way ANOVA of IL-10
- Ordinary one-way ANOVA of IL-1beta
- New Analysis...

Family

- IL-1beta
- Ordinary one-way ANOVA
- IL-1beta

| Ordinary one-way ANOVA |                                     |                   |                           |                     |                    |                         |           |          |           |
|------------------------|-------------------------------------|-------------------|---------------------------|---------------------|--------------------|-------------------------|-----------|----------|-----------|
| Multiple comparisons   |                                     |                   |                           |                     |                    |                         |           |          |           |
| 1                      | Number of families                  | 1                 |                           |                     |                    |                         |           |          |           |
| 2                      | Number of comparisons per family    | 21                |                           |                     |                    |                         |           |          |           |
| 3                      | Alpha                               | 0.05              |                           |                     |                    |                         |           |          |           |
| 4                      |                                     |                   |                           |                     |                    |                         |           |          |           |
| 5                      | <b>Tukey's multiple comparisons</b> | <b>Mean Diff.</b> | <b>95.00% CI of diff.</b> | <b>Significant?</b> | <b>Summary</b>     | <b>Adjusted P Value</b> |           |          |           |
| 6                      | Control vs. RBC                     | -2.123            | -2107 to 2102             | No                  | ns                 | >0.9999                 |           | A-B      |           |
| 7                      | Control vs. iRBC                    | -75.41            | -2180 to 2029             | No                  | ns                 | >0.9999                 |           | A-C      |           |
| 8                      | Control vs. RBCL                    | -9.570            | -2114 to 2095             | No                  | ns                 | >0.9999                 |           | A-D      |           |
| 9                      | Control vs. iRBCL                   | -126.6            | -2231 to 1978             | No                  | ns                 | >0.9999                 |           | A-E      |           |
| 10                     | Control vs. XO                      | -3381             | -5486 to -1276            | Yes                 | ***                | 0.0010                  |           | A-F      |           |
| 11                     | Control vs. LPS                     | -6299             | -8247 to -4351            | Yes                 | ****               | <0.0001                 |           | A-G      |           |
| 12                     | RBC vs. iRBC                        | -73.29            | -2323 to 2177             | No                  | ns                 | >0.9999                 |           | B-C      |           |
| 13                     | RBC vs. RBCL                        | -7.448            | -2257 to 2242             | No                  | ns                 | >0.9999                 |           | B-D      |           |
| 14                     | RBC vs. iRBCL                       | -124.5            | -2374 to 2125             | No                  | ns                 | >0.9999                 |           | B-E      |           |
| 15                     | RBC vs. XO                          | -3379             | -5629 to -1129            | Yes                 | **                 | 0.0019                  |           | B-F      |           |
| 16                     | RBC vs. LPS                         | -6297             | -8401 to -4192            | Yes                 | ****               | <0.0001                 |           | B-G      |           |
| 17                     | iRBC vs. RBCL                       | 65.84             | -2184 to 2316             | No                  | ns                 | >0.9999                 |           | C-D      |           |
| 18                     | iRBC vs. iRBCL                      | -51.18            | -2301 to 2199             | No                  | ns                 | >0.9999                 |           | C-E      |           |
| 19                     | iRBC vs. XO                         | -3306             | -5555 to -1056            | Yes                 | **                 | 0.0023                  |           | C-F      |           |
| 20                     | iRBC vs. LPS                        | -6223             | -8328 to -4119            | Yes                 | ****               | <0.0001                 |           | C-G      |           |
| 21                     | RBCL vs. iRBCL                      | -117.0            | -2367 to 2133             | No                  | ns                 | >0.9999                 |           | D-E      |           |
| 22                     | RBCL vs. XO                         | -3371             | -5621 to -1122            | Yes                 | **                 | 0.0019                  |           | D-F      |           |
| 23                     | RBCL vs. LPS                        | -6289             | -8394 to -4185            | Yes                 | ****               | <0.0001                 |           | D-G      |           |
| 24                     | iRBCL vs. XO                        | -3254             | -5504 to -1005            | Yes                 | **                 | 0.0027                  |           | E-F      |           |
| 25                     | iRBCL vs. LPS                       | -6172             | -8277 to -4068            | Yes                 | ****               | <0.0001                 |           | E-G      |           |
| 26                     | XO vs. LPS                          | -2918             | -5022 to -813.4           | Yes                 | **                 | 0.0040                  |           | F-G      |           |
| 27                     |                                     |                   |                           |                     |                    |                         |           |          |           |
| 28                     | <b>Test details</b>                 | <b>Mean 1</b>     | <b>Mean 2</b>             | <b>Mean Diff.</b>   | <b>SE of diff.</b> | <b>n1</b>               | <b>n2</b> | <b>q</b> | <b>DF</b> |
| 29                     | Control vs. RBC                     | 12.40             | 14.52                     | -2.123              | 627.8              | 4                       | 3         | 0.004781 | 16        |
| 30                     | Control vs. iRBC                    | 12.40             | 87.81                     | -75.41              | 627.8              | 4                       | 3         | 0.1699   | 16        |

Ordinary one-way ANOVA of IL-1beta Row 2, Column B

SourceDataforFigure2E — Edited

File Sheet Undo Clipboard Analysis Interpret Change Draw Write Text Export Print Send LA Help Prism8

Search ANOVA results Multiple comparisons

▼ Data Tables

- TNF
- IL-6
- IL-10
- IL-1beta**
- New Data Table...

▼ Info

- Project info 1
- Project info 1
- New Info...

▼ Results

- Ordinary one-way ANOVA of TNF
- Ordinary one-way ANOVA of IL-6
- Ordinary one-way ANOVA of IL-10
- Ordinary one-way ANOVA of IL-1beta**
- New Analysis...

Family

- IL-1beta
- Ordinary one-way ANOVA
- IL-1beta

| Ordinary one-way ANOVA |                     | Multiple comparisons |                 |                   |                    |           |           |          |           |
|------------------------|---------------------|----------------------|-----------------|-------------------|--------------------|-----------|-----------|----------|-----------|
| Test details           | Mean 1              | Mean 2               | Mean Diff.      | SE of diff.       | n1                 | n2        | q         | DF       |           |
| 22                     | RBCL vs. XO         | -3371                | -5621 to -1122  | Yes               | **                 | 0.0019    | D-F       |          |           |
| 23                     | RBCL vs. LPS        | -6289                | -8394 to -4185  | Yes               | ****               | <0.0001   | D-G       |          |           |
| 24                     | iRBCL vs. XO        | -3254                | -5504 to -1005  | Yes               | **                 | 0.0027    | E-F       |          |           |
| 25                     | iRBCL vs. LPS       | -6172                | -8277 to -4068  | Yes               | ****               | <0.0001   | E-G       |          |           |
| 26                     | XO vs. LPS          | -2918                | -5022 to -813.4 | Yes               | **                 | 0.0040    | F-G       |          |           |
| 27                     |                     |                      |                 |                   |                    |           |           |          |           |
| 28                     | <b>Test details</b> | <b>Mean 1</b>        | <b>Mean 2</b>   | <b>Mean Diff.</b> | <b>SE of diff.</b> | <b>n1</b> | <b>n2</b> | <b>q</b> | <b>DF</b> |
| 29                     | Control vs. RBC     | 12.40                | 14.52           | -2.123            | 627.8              | 4         | 3         | 0.004781 | 16        |
| 30                     | Control vs. iRBC    | 12.40                | 87.81           | -75.41            | 627.8              | 4         | 3         | 0.1699   | 16        |
| 31                     | Control vs. RBCL    | 12.40                | 21.97           | -9.570            | 627.8              | 4         | 3         | 0.02156  | 16        |
| 32                     | Control vs. iRBCL   | 12.40                | 139.0           | -126.6            | 627.8              | 4         | 3         | 0.2852   | 16        |
| 33                     | Control vs. XO      | 12.40                | 3393            | -3381             | 627.8              | 4         | 3         | 7.616    | 16        |
| 34                     | Control vs. LPS     | 12.40                | 6311            | -6299             | 581.2              | 4         | 4         | 15.33    | 16        |
| 35                     | RBC vs. iRBC        | 14.52                | 87.81           | -73.29            | 671.2              | 3         | 3         | 0.1544   | 16        |
| 36                     | RBC vs. RBCL        | 14.52                | 21.97           | -7.448            | 671.2              | 3         | 3         | 0.01569  | 16        |
| 37                     | RBC vs. iRBCL       | 14.52                | 139.0           | -124.5            | 671.2              | 3         | 3         | 0.2623   | 16        |
| 38                     | RBC vs. XO          | 14.52                | 3393            | -3379             | 671.2              | 3         | 3         | 7.120    | 16        |
| 39                     | RBC vs. LPS         | 14.52                | 6311            | -6297             | 627.8              | 3         | 4         | 14.18    | 16        |
| 40                     | iRBC vs. RBCL       | 87.81                | 21.97           | 65.84             | 671.2              | 3         | 3         | 0.1387   | 16        |
| 41                     | iRBC vs. iRBCL      | 87.81                | 139.0           | -51.18            | 671.2              | 3         | 3         | 0.1078   | 16        |
| 42                     | iRBC vs. XO         | 87.81                | 3393            | -3306             | 671.2              | 3         | 3         | 6.965    | 16        |
| 43                     | iRBC vs. LPS        | 87.81                | 6311            | -6223             | 627.8              | 3         | 4         | 14.02    | 16        |
| 44                     | RBCL vs. iRBCL      | 21.97                | 139.0           | -117.0            | 671.2              | 3         | 3         | 0.2466   | 16        |
| 45                     | RBCL vs. XO         | 21.97                | 3393            | -3371             | 671.2              | 3         | 3         | 7.104    | 16        |
| 46                     | RBCL vs. LPS        | 21.97                | 6311            | -6289             | 627.8              | 3         | 4         | 14.17    | 16        |
| 47                     | iRBCL vs. XO        | 139.0                | 3393            | -3254             | 671.2              | 3         | 3         | 6.857    | 16        |
| 48                     | iRBCL vs. LPS       | 139.0                | 6311            | -6172             | 627.8              | 3         | 4         | 13.90    | 16        |
| 49                     | XO vs. LPS          | 3393                 | 6311            | -2918             | 627.8              | 3         | 4         | 6.573    | 16        |
| 50                     |                     |                      |                 |                   |                    |           |           |          |           |
| 51                     |                     |                      |                 |                   |                    |           |           |          |           |

Ordinary one-way ANOVA of IL-1beta Row 2, Column B
