# Supplementary material for: Malaria inflammation by xanthine oxidase‐produced reactive oxygen species
Source: PubMed Central journal article supplement (PMC6685105; doi:10.15252/emmm.201809903), 2019-07-02
Supplement: EMMM-11-e9903-s004.pdf [file EMMM-11-e9903-s004.pdf]

SourceDataforFigure3A — Edited

File Sheet Undo Clipboard Analysis Change Import Draw Write Text Export Print Send LA Help

GraphPad Prism 8

Search

▼ Data Tables >>

- Table format: Grouped
- Fold change controls time XO
- + New Data Table...

▼ Info >>

- Project info 1
- Project info 1
- + New Info...

▼ Results >>

- Transpose of Fold change control
- Transform of Fold change control
- Ordinary one-way ANOVA of Tran
- + New Analysis...

▼ Graphs >>

- Fold change controls time XO NO
- + New Graph...

► Layouts >>

| Table format: Grouped |       | Group B     |            |           | Group C  |          |          | Group D     |            |           | Group E |      |      | Group F |      |      |
|-----------------------|-------|-------------|------------|-----------|----------|----------|----------|-------------|------------|-----------|---------|------|------|---------|------|------|
|                       |       | IL-6        |            |           | IL-10    |          |          | TNF         |            |           | Title   |      |      | Title   |      |      |
|                       |       | B:Y1        | B:Y2       | B:Y3      | C:Y1     | C:Y2     | C:Y3     | D:Y1        | D:Y2       | D:Y3      | E:Y1    | E:Y2 | E:Y3 | F:Y1    | F:Y2 | F:Y3 |
| 2                     | 1     |             | 0.6965318  | 0.2891498 |          | 0.000000 | 1.000000 |             | 0.9116279  | 0.5938449 |         |      |      |         |      |      |
| 3                     | 3     |             | 0.8179191  | 0.5349642 |          | 0.990741 | 1.000000 |             | 1.2046510  | 0.5460643 |         |      |      |         |      |      |
| 4                     | 5     |             | 1.3251450  | 0.6650730 |          | 0.000000 | 1.000000 |             | 1.7054260  | 1.2442400 |         |      |      |         |      |      |
| 5                     | 15    | 179.4418000 | 3.3887280  | 2.7436870 | 5.098425 | 0.000000 | 1.000000 | 177.3067000 | 3.7271320  | 5.6027210 |         |      |      |         |      |      |
| 6                     | 30    | 224.6579000 | 6.6026010  | 2.1013770 | 7.485549 | 1.203704 | 1.000000 | 158.4269000 | 7.6310080  | 5.3370140 |         |      |      |         |      |      |
| 7                     | 60    | 916.8219000 | 10.7933500 | 1.0026620 | 3.990610 | 1.185185 | 1.000000 | 111.1200000 | 14.0573600 | 4.8587770 |         |      |      |         |      |      |
| 8                     | Title |             |            |           |          |          |          |             |            |           |         |      |      |         |      |      |
| 9                     | Title |             |            |           |          |          |          |             |            |           |         |      |      |         |      |      |
| 10                    | Title |             |            |           |          |          |          |             |            |           |         |      |      |         |      |      |
| 11                    | Title |             |            |           |          |          |          |             |            |           |         |      |      |         |      |      |
| 12                    | Title |             |            |           |          |          |          |             |            |           |         |      |      |         |      |      |
| 13                    | Title |             |            |           |          |          |          |             |            |           |         |      |      |         |      |      |
| 14                    | Title |             |            |           |          |          |          |             |            |           |         |      |      |         |      |      |
| 15                    | Title |             |            |           |          |          |          |             |            |           |         |      |      |         |      |      |
| 16                    | Title |             |            |           |          |          |          |             |            |           |         |      |      |         |      |      |
| 17                    | Title |             |            |           |          |          |          |             |            |           |         |      |      |         |      |      |
| 18                    | Title |             |            |           |          |          |          |             |            |           |         |      |      |         |      |      |
| 19                    | Title |             |            |           |          |          |          |             |            |           |         |      |      |         |      |      |
| 20                    | Title |             |            |           |          |          |          |             |            |           |         |      |      |         |      |      |
| 21                    | Title |             |            |           |          |          |          |             |            |           |         |      |      |         |      |      |
| 22                    | Title |             |            |           |          |          |          |             |            |           |         |      |      |         |      |      |
| 23                    | Title |             |            |           |          |          |          |             |            |           |         |      |      |         |      |      |
| 24                    | Title |             |            |           |          |          |          |             |            |           |         |      |      |         |      |      |
| 25                    | Title |             |            |           |          |          |          |             |            |           |         |      |      |         |      |      |
| 26                    | Title |             |            |           |          |          |          |             |            |           |         |      |      |         |      |      |
| 27                    | Title |             |            |           |          |          |          |             |            |           |         |      |      |         |      |      |
| 28                    | Title |             |            |           |          |          |          |             |            |           |         |      |      |         |      |      |
| 29                    | Title |             |            |           |          |          |          |             |            |           |         |      |      |         |      |      |
| 30                    | Title |             |            |           |          |          |          |             |            |           |         |      |      |         |      |      |
| 31                    | Title |             |            |           |          |          |          |             |            |           |         |      |      |         |      |      |
| 32                    | Title |             |            |           |          |          |          |             |            |           |         |      |      |         |      |      |
| 33                    | Title |             |            |           |          |          |          |             |            |           |         |      |      |         |      |      |
| 34                    | Title |             |            |           |          |          |          |             |            |           |         |      |      |         |      |      |
| 35                    | Title |             |            |           |          |          |          |             |            |           |         |      |      |         |      |      |
| 36                    | Title |             |            |           |          |          |          |             |            |           |         |      |      |         |      |      |

Fold change controls time XO

Row 11, C: IL-10

SourceDataforFigure3A — Edited

File Sheet Undo Clipboard Analysis Interpret Change Draw Write Text Export Print Send LA Help

Prism 8

Search

▼ Data Tables

- Fold change controls time XO
- New Data Table...

▼ Info

- Project info 1
- Project info 1
- New Info...

▼ Results

- Transpose of Fold change control
- Transform of Fold change control
- Ordinary one-way ANOVA of Tran
- New Analysis...

▼ Graphs

- Fold change controls time XO NO 2
- New Graph...

► Layouts

|    | Transpose | A     |       |       | B    |       |       | C    |       |       | D    |       |       | E       |       |       | F       |       |       | G       |        |       |
|----|-----------|-------|-------|-------|------|-------|-------|------|-------|-------|------|-------|-------|---------|-------|-------|---------|-------|-------|---------|--------|-------|
|    |           | 0     |       |       | 1    |       |       | 3    |       |       | 5    |       |       | 15      |       |       | 30      |       |       | 60      |        |       |
|    |           | A:Y1  | A:Y2  | A:Y3  | B:Y1 | B:Y2  | B:Y3  | C:Y1 | C:Y2  | C:Y3  | D:Y1 | D:Y2  | D:Y3  | E:Y1    | E:Y2  | E:Y3  | F:Y1    | F:Y2  | F:Y3  | G:Y1    | G:Y2   | G:Y3  |
| 2  | IL-6      | 1.000 | 1.000 | 1.000 |      | 0.697 | 0.289 |      | 0.818 | 0.535 |      | 1.325 | 0.665 | 179.442 | 3.389 | 2.744 | 224.658 | 6.603 | 2.101 | 916.822 | 10.793 | 1.003 |
| 3  | IL-10     | 1.000 | 1.000 | 1.000 |      | 0.000 | 1.000 |      | 0.991 | 1.000 |      | 0.000 | 1.000 | 5.098   | 0.000 | 1.000 | 7.486   | 1.204 | 1.000 | 3.991   | 1.185  | 1.000 |
| 4  | TNF       | 1.000 | 1.000 | 1.000 |      | 0.912 | 0.594 |      | 1.205 | 0.546 |      | 1.705 | 1.244 | 177.307 | 3.727 | 5.603 | 158.427 | 7.631 | 5.337 | 111.120 | 14.057 | 4.859 |
| 5  |           |       |       |       |      |       |       |      |       |       |      |       |       |         |       |       |         |       |       |         |        |       |
| 6  |           |       |       |       |      |       |       |      |       |       |      |       |       |         |       |       |         |       |       |         |        |       |
| 7  |           |       |       |       |      |       |       |      |       |       |      |       |       |         |       |       |         |       |       |         |        |       |
| 8  |           |       |       |       |      |       |       |      |       |       |      |       |       |         |       |       |         |       |       |         |        |       |
| 9  |           |       |       |       |      |       |       |      |       |       |      |       |       |         |       |       |         |       |       |         |        |       |
| 10 |           |       |       |       |      |       |       |      |       |       |      |       |       |         |       |       |         |       |       |         |        |       |
| 11 |           |       |       |       |      |       |       |      |       |       |      |       |       |         |       |       |         |       |       |         |        |       |
| 12 |           |       |       |       |      |       |       |      |       |       |      |       |       |         |       |       |         |       |       |         |        |       |
| 13 |           |       |       |       |      |       |       |      |       |       |      |       |       |         |       |       |         |       |       |         |        |       |
| 14 |           |       |       |       |      |       |       |      |       |       |      |       |       |         |       |       |         |       |       |         |        |       |
| 15 |           |       |       |       |      |       |       |      |       |       |      |       |       |         |       |       |         |       |       |         |        |       |
| 16 |           |       |       |       |      |       |       |      |       |       |      |       |       |         |       |       |         |       |       |         |        |       |
| 17 |           |       |       |       |      |       |       |      |       |       |      |       |       |         |       |       |         |       |       |         |        |       |
| 18 |           |       |       |       |      |       |       |      |       |       |      |       |       |         |       |       |         |       |       |         |        |       |
| 19 |           |       |       |       |      |       |       |      |       |       |      |       |       |         |       |       |         |       |       |         |        |       |
| 20 |           |       |       |       |      |       |       |      |       |       |      |       |       |         |       |       |         |       |       |         |        |       |
| 21 |           |       |       |       |      |       |       |      |       |       |      |       |       |         |       |       |         |       |       |         |        |       |
| 22 |           |       |       |       |      |       |       |      |       |       |      |       |       |         |       |       |         |       |       |         |        |       |
| 23 |           |       |       |       |      |       |       |      |       |       |      |       |       |         |       |       |         |       |       |         |        |       |
| 24 |           |       |       |       |      |       |       |      |       |       |      |       |       |         |       |       |         |       |       |         |        |       |
| 25 |           |       |       |       |      |       |       |      |       |       |      |       |       |         |       |       |         |       |       |         |        |       |
| 26 |           |       |       |       |      |       |       |      |       |       |      |       |       |         |       |       |         |       |       |         |        |       |
| 27 |           |       |       |       |      |       |       |      |       |       |      |       |       |         |       |       |         |       |       |         |        |       |
| 28 |           |       |       |       |      |       |       |      |       |       |      |       |       |         |       |       |         |       |       |         |        |       |
| 29 |           |       |       |       |      |       |       |      |       |       |      |       |       |         |       |       |         |       |       |         |        |       |
| 30 |           |       |       |       |      |       |       |      |       |       |      |       |       |         |       |       |         |       |       |         |        |       |
| 31 |           |       |       |       |      |       |       |      |       |       |      |       |       |         |       |       |         |       |       |         |        |       |
| 32 |           |       |       |       |      |       |       |      |       |       |      |       |       |         |       |       |         |       |       |         |        |       |
| 33 |           |       |       |       |      |       |       |      |       |       |      |       |       |         |       |       |         |       |       |         |        |       |
| 34 |           |       |       |       |      |       |       |      |       |       |      |       |       |         |       |       |         |       |       |         |        |       |
| 35 |           |       |       |       |      |       |       |      |       |       |      |       |       |         |       |       |         |       |       |         |        |       |
| 36 |           |       |       |       |      |       |       |      |       |       |      |       |       |         |       |       |         |       |       |         |        |       |

Transpose of Fold change controls time XO | Row 1, A: 0

File Sheet Undo Clipboard Analysis Interpret Change Draw Write Text Export Print Send LA Help

10 Arial

|    |           | A     |       |       | B    |        |        | C    |        |        | D    |       |        | E     |       |       | F     |       |       | G     |       |       |      |
|----|-----------|-------|-------|-------|------|--------|--------|------|--------|--------|------|-------|--------|-------|-------|-------|-------|-------|-------|-------|-------|-------|------|
|    |           | 0     |       |       | 1    |        |        | 3    |        |        | 5    |       |        | 15    |       |       | 30    |       |       | 60    |       |       |      |
|    | Transform | A:Y1  | A:Y2  | A:Y3  | B:Y1 | B:Y2   | B:Y3   | C:Y1 | C:Y2   | C:Y3   | D:Y1 | D:Y2  | D:Y3   | E:Y1  | E:Y2  | E:Y3  | F:Y1  | F:Y2  | F:Y3  | G:Y1  | G:Y2  | G:Y3  | H:Y1 |
| 1  | IL-1beta  | 0.000 | 0.000 | 0.000 |      | 0.000  | -0.012 |      | 0.000  | 0.014  |      | 0.000 | 0.005  | 0.907 | 0.000 | 0.290 | 0.670 | 0.000 | 0.007 | 0.637 | 0.000 | 0.016 |      |
| 2  | IL-6      | 0.000 | 0.000 | 0.000 |      | -0.157 | -0.539 |      | -0.087 | -0.272 |      | 0.122 | -0.177 | 2.254 | 0.530 | 0.438 | 2.352 | 0.820 | 0.323 | 2.962 | 1.033 | 0.001 |      |
| 3  | IL-10     | 0.000 | 0.000 | 0.000 |      |        | 0.000  |      | -0.004 | 0.000  |      |       | 0.000  | 0.707 | 0.000 | 0.000 | 0.874 | 0.081 | 0.000 | 0.601 | 0.074 | 0.000 |      |
| 4  | TNF       | 0.000 | 0.000 | 0.000 |      | -0.040 | -0.226 |      | 0.081  | -0.263 |      | 0.232 | 0.095  | 2.249 | 0.571 | 0.748 | 2.200 | 0.883 | 0.727 | 2.046 | 1.148 | 0.687 |      |
| 5  |           |       |       |       |      |        |        |      |        |        |      |       |        |       |       |       |       |       |       |       |       |       |      |
| 6  |           |       |       |       |      |        |        |      |        |        |      |       |        |       |       |       |       |       |       |       |       |       |      |
| 7  |           |       |       |       |      |        |        |      |        |        |      |       |        |       |       |       |       |       |       |       |       |       |      |
| 8  |           |       |       |       |      |        |        |      |        |        |      |       |        |       |       |       |       |       |       |       |       |       |      |
| 9  |           |       |       |       |      |        |        |      |        |        |      |       |        |       |       |       |       |       |       |       |       |       |      |
| 10 |           |       |       |       |      |        |        |      |        |        |      |       |        |       |       |       |       |       |       |       |       |       |      |
| 11 |           |       |       |       |      |        |        |      |        |        |      |       |        |       |       |       |       |       |       |       |       |       |      |
| 12 |           |       |       |       |      |        |        |      |        |        |      |       |        |       |       |       |       |       |       |       |       |       |      |
| 13 |           |       |       |       |      |        |        |      |        |        |      |       |        |       |       |       |       |       |       |       |       |       |      |
| 14 |           |       |       |       |      |        |        |      |        |        |      |       |        |       |       |       |       |       |       |       |       |       |      |
| 15 |           |       |       |       |      |        |        |      |        |        |      |       |        |       |       |       |       |       |       |       |       |       |      |
| 16 |           |       |       |       |      |        |        |      |        |        |      |       |        |       |       |       |       |       |       |       |       |       |      |
| 17 |           |       |       |       |      |        |        |      |        |        |      |       |        |       |       |       |       |       |       |       |       |       |      |
| 18 |           |       |       |       |      |        |        |      |        |        |      |       |        |       |       |       |       |       |       |       |       |       |      |
| 19 |           |       |       |       |      |        |        |      |        |        |      |       |        |       |       |       |       |       |       |       |       |       |      |
| 20 |           |       |       |       |      |        |        |      |        |        |      |       |        |       |       |       |       |       |       |       |       |       |      |
| 21 |           |       |       |       |      |        |        |      |        |        |      |       |        |       |       |       |       |       |       |       |       |       |      |
| 22 |           |       |       |       |      |        |        |      |        |        |      |       |        |       |       |       |       |       |       |       |       |       |      |
| 23 |           |       |       |       |      |        |        |      |        |        |      |       |        |       |       |       |       |       |       |       |       |       |      |
| 24 |           |       |       |       |      |        |        |      |        |        |      |       |        |       |       |       |       |       |       |       |       |       |      |
| 25 |           |       |       |       |      |        |        |      |        |        |      |       |        |       |       |       |       |       |       |       |       |       |      |
| 26 |           |       |       |       |      |        |        |      |        |        |      |       |        |       |       |       |       |       |       |       |       |       |      |
| 27 |           |       |       |       |      |        |        |      |        |        |      |       |        |       |       |       |       |       |       |       |       |       |      |
| 28 |           |       |       |       |      |        |        |      |        |        |      |       |        |       |       |       |       |       |       |       |       |       |      |
| 29 |           |       |       |       |      |        |        |      |        |        |      |       |        |       |       |       |       |       |       |       |       |       |      |
| 30 |           |       |       |       |      |        |        |      |        |        |      |       |        |       |       |       |       |       |       |       |       |       |      |
| 31 |           |       |       |       |      |        |        |      |        |        |      |       |        |       |       |       |       |       |       |       |       |       |      |
| 32 |           |       |       |       |      |        |        |      |        |        |      |       |        |       |       |       |       |       |       |       |       |       |      |
| 33 |           |       |       |       |      |        |        |      |        |        |      |       |        |       |       |       |       |       |       |       |       |       |      |
| 34 |           |       |       |       |      |        |        |      |        |        |      |       |        |       |       |       |       |       |       |       |       |       |      |
| 35 |           |       |       |       |      |        |        |      |        |        |      |       |        |       |       |       |       |       |       |       |       |       |      |

SourceDataforFigure3A — Edited

File Sheet Undo Clipboard Analysis Interpret Change Draw Write Text Export Print Send LA Help

Prism 8

Search ANOVA results Multiple comparisons

▼ Data Tables >>

- Fold change controls time XO
- New Data Table...

▼ Info >>

- Project info 1
- Project info 1
- New Info...

▼ Results >>

- Transpose of Fold change control
- Transform of Fold change control
- Ordinary one-way ANOVA of Tran
- New Analysis...

▼ Graphs >>

- Fold change controls time XO NO 2
- New Graph...

► Layouts >>

| Ordinary one-way ANOVA |                                             |                                           |           |           |                     |                |
|------------------------|---------------------------------------------|-------------------------------------------|-----------|-----------|---------------------|----------------|
| ANOVA results          |                                             |                                           |           |           |                     |                |
| 1                      | Table Analyzed                              | Transform of Fold change controls time XO |           |           |                     |                |
| 2                      | Data sets analyzed                          | A-G                                       |           |           |                     |                |
| 3                      |                                             |                                           |           |           |                     |                |
| 4                      | <b>ANOVA summary</b>                        |                                           |           |           |                     |                |
| 5                      | F                                           | 5.475                                     |           |           |                     |                |
| 6                      | P value                                     | 0.0015                                    |           |           |                     |                |
| 7                      | P value summary                             | **                                        |           |           |                     |                |
| 8                      | Significant diff. among means (P < 0.05)?   | Yes                                       |           |           |                     |                |
| 9                      | R square                                    | 0.6100                                    |           |           |                     |                |
| 10                     |                                             |                                           |           |           |                     |                |
| 11                     | <b>Brown-Forsythe test</b>                  |                                           |           |           |                     |                |
| 12                     | F (DFn, DFd)                                | 55.33 (6, 21)                             |           |           |                     |                |
| 13                     | P value                                     | <0.0001                                   |           |           |                     |                |
| 14                     | P value summary                             | ****                                      |           |           |                     |                |
| 15                     | Are SDs significantly different (P < 0.05)? | Yes                                       |           |           |                     |                |
| 16                     |                                             |                                           |           |           |                     |                |
| 17                     | <b>Bartlett's test</b>                      |                                           |           |           |                     |                |
| 18                     | Bartlett's statistic (corrected)            |                                           |           |           |                     |                |
| 19                     | P value                                     |                                           |           |           |                     |                |
| 20                     | P value summary                             |                                           |           |           |                     |                |
| 21                     | Are SDs significantly different (P < 0.05)? |                                           |           |           |                     |                |
| 22                     |                                             |                                           |           |           |                     |                |
| 23                     | <b>ANOVA table</b>                          | <b>SS</b>                                 | <b>DF</b> | <b>MS</b> | <b>F (DFn, DFd)</b> | <b>P value</b> |
| 24                     | Treatment (between columns)                 | 4.378                                     | 6         | 0.7297    | F (6, 21) = 5.475   | P=0.0015       |
| 25                     | Residual (within columns)                   | 2.799                                     | 21        | 0.1333    |                     |                |
| 26                     | Total                                       | 7.177                                     | 27        |           |                     |                |
| 27                     |                                             |                                           |           |           |                     |                |
| 28                     | <b>Data summary</b>                         |                                           |           |           |                     |                |
| 29                     | Number of treatments (columns)              | 7                                         |           |           |                     |                |
| 30                     | Number of values (total)                    | 28                                        |           |           |                     |                |
| 31                     |                                             |                                           |           |           |                     |                |
| 32                     |                                             |                                           |           |           |                     |                |
| 33                     |                                             |                                           |           |           |                     |                |

Ordinary one-way ANOVA of Transform of Fo Row 1, Column A

SourceDataforFigure3A — Edited

File Sheet Undo Clipboard Analysis Interpret Change Draw Write Text Export Print Send LA Help

Prism 8

Search

ANOVA results Multiple comparisons

▼ Data Tables >>  
 ◻ Fold change controls time XO  
 + New Data Table...

▼ Info >>  
 ⓘ Project info 1  
 ⓘ Project info 1  
 + New Info...

▼ Results >>  
 ◻ Transpose of Fold change control  
 ◻ Transform of Fold change control  
 ◻ Ordinary one-way ANOVA of Tran  
 + New Analysis...

▼ Graphs >>  
 ◻ Fold change controls time XO NO 2  
 + New Graph...

► Layouts >>

| Ordinary one-way ANOVA |                                   |            |                    |              |             |                  |     |        |    |
|------------------------|-----------------------------------|------------|--------------------|--------------|-------------|------------------|-----|--------|----|
| Multiple comparisons   |                                   |            |                    |              |             |                  |     |        |    |
| 1                      | Number of families                | 1          |                    |              |             |                  |     |        |    |
| 2                      | Number of comparisons per family  | 21         |                    |              |             |                  |     |        |    |
| 3                      | Alpha                             | 0.05       |                    |              |             |                  |     |        |    |
| 4                      |                                   |            |                    |              |             |                  |     |        |    |
| 5                      | Tukey's multiple comparisons test | Mean Diff. | 95.00% CI of diff. | Significant? | Summary     | Adjusted P Value |     |        |    |
| 6                      | 0 vs. 1                           | 0.1218     | -0.7174 to 0.9610  | No           | ns          | 0.9990           | A-B |        |    |
| 7                      | 0 vs. 3                           | 0.06632    | -0.7729 to 0.9055  | No           | ns          | >0.9999          | A-C |        |    |
| 8                      | 0 vs. 5                           | -0.03464   | -0.8738 to 0.8045  | No           | ns          | >0.9999          | A-D |        |    |
| 9                      | 0 vs. 15                          | -0.7542    | -1.593 to 0.08503  | No           | ns          | 0.0969           | A-E |        |    |
| 10                     | 0 vs. 30                          | -0.7446    | -1.584 to 0.09459  | No           | ns          | 0.1041           | A-F |        |    |
| 11                     | 0 vs. 60                          | -0.7671    | -1.606 to 0.07211  | No           | ns          | 0.0879           | A-G |        |    |
| 12                     | 1 vs. 3                           | -0.05550   | -0.8947 to 0.7837  | No           | ns          | >0.9999          | B-C |        |    |
| 13                     | 1 vs. 5                           | -0.1565    | -0.9956 to 0.6827  | No           | ns          | 0.9959           | B-D |        |    |
| 14                     | 1 vs. 15                          | -0.8760    | -1.715 to -0.03679 | Yes          | *           | 0.0371           | B-E |        |    |
| 15                     | 1 vs. 30                          | -0.8664    | -1.706 to -0.02722 | Yes          | *           | 0.0401           | B-F |        |    |
| 16                     | 1 vs. 60                          | -0.8889    | -1.728 to -0.04970 | Yes          | *           | 0.0333           | B-G |        |    |
| 17                     | 3 vs. 5                           | -0.1010    | -0.9401 to 0.7382  | No           | ns          | 0.9996           | C-D |        |    |
| 18                     | 3 vs. 15                          | -0.8205    | -1.660 to 0.01871  | No           | ns          | 0.0581           | C-E |        |    |
| 19                     | 3 vs. 30                          | -0.8109    | -1.650 to 0.02827  | No           | ns          | 0.0626           | C-F |        |    |
| 20                     | 3 vs. 60                          | -0.8334    | -1.673 to 0.005794 | No           | ns          | 0.0524           | C-G |        |    |
| 21                     | 5 vs. 15                          | -0.7195    | -1.559 to 0.1197   | No           | ns          | 0.1252           | D-E |        |    |
| 22                     | 5 vs. 30                          | -0.7099    | -1.549 to 0.1292   | No           | ns          | 0.1341           | D-F |        |    |
| 23                     | 5 vs. 60                          | -0.7324    | -1.572 to 0.1068   | No           | ns          | 0.1139           | D-G |        |    |
| 24                     | 15 vs. 30                         | 0.009566   | -0.8296 to 0.8487  | No           | ns          | >0.9999          | E-F |        |    |
| 25                     | 15 vs. 60                         | -0.01291   | -0.8521 to 0.8263  | No           | ns          | >0.9999          | E-G |        |    |
| 26                     | 30 vs. 60                         | -0.02248   | -0.8617 to 0.8167  | No           | ns          | >0.9999          | F-G |        |    |
| 27                     |                                   |            |                    |              |             |                  |     |        |    |
| 28                     | Test details                      | Mean 1     | Mean 2             | Mean Diff.   | SE of diff. | n1               | n2  | q      | DF |
| 29                     | 0 vs. 1                           | 0.000      | -0.1218            | 0.1218       | 0.2581      | 4                | 4   | 0.6674 | 21 |
| 30                     | 0 vs. 3                           | 0.000      | -0.06632           | 0.06632      | 0.2581      | 4                | 4   | 0.3633 | 21 |
| 31                     | 0 vs. 5                           | 0.000      | 0.03464            | -0.03464     | 0.2581      | 4                | 4   | 0.1898 | 21 |
| 32                     | 0 vs. 15                          | 0.000      | 0.7542             | -0.7542      | 0.2581      | 4                | 4   | 4.131  | 21 |
| 33                     | 0 vs. 30                          | 0.000      | 0.7446             | -0.7446      | 0.2581      | 4                | 4   | 4.079  | 21 |

Ordinary one-way ANOVA of Transform of Fo Row 1, Column A

SourceDataforFigure3A — Edited

File Sheet Undo Clipboard Analysis Interpret Change Draw Write Text Export Print Send LA Help

Prism 8

Search

ANOVA results Multiple comparisons

▼ Data Tables

- Fold change controls time XO
- New Data Table...

▼ Info

- Project info 1
- Project info 1
- New Info...

▼ Results

- Transpose of Fold change control
- Transform of Fold change control
- Ordinary one-way ANOVA of Tran
- New Analysis...

▼ Graphs

- Fold change controls time XO NO 2
- New Graph...

► Layouts

|    | Ordinary one-way ANOVA |               |                   |                    |           |           |          |           |  |
|----|------------------------|---------------|-------------------|--------------------|-----------|-----------|----------|-----------|--|
|    | Multiple comparisons   |               |                   |                    |           |           |          |           |  |
| 27 |                        |               |                   |                    |           |           |          |           |  |
| 28 | <b>Test details</b>    | <b>Mean 2</b> | <b>Mean Diff.</b> | <b>SE of diff.</b> | <b>n1</b> | <b>n2</b> | <b>q</b> | <b>DF</b> |  |
| 29 | 0 vs. 1                | -0.1218       | 0.1218            | 0.2581             | 4         | 4         | 0.6674   | 21        |  |
| 30 | 0 vs. 3                | -0.06632      | 0.06632           | 0.2581             | 4         | 4         | 0.3633   | 21        |  |
| 31 | 0 vs. 5                | 0.03464       | -0.03464          | 0.2581             | 4         | 4         | 0.1898   | 21        |  |
| 32 | 0 vs. 15               | 0.7542        | -0.7542           | 0.2581             | 4         | 4         | 4.131    | 21        |  |
| 33 | 0 vs. 30               | 0.7446        | -0.7446           | 0.2581             | 4         | 4         | 4.079    | 21        |  |
| 34 | 0 vs. 60               | 0.7671        | -0.7671           | 0.2581             | 4         | 4         | 4.202    | 21        |  |
| 35 | 1 vs. 3                | -0.06632      | -0.05550          | 0.2581             | 4         | 4         | 0.3040   | 21        |  |
| 36 | 1 vs. 5                | 0.03464       | -0.1565           | 0.2581             | 4         | 4         | 0.8571   | 21        |  |
| 37 | 1 vs. 15               | 0.7542        | -0.8760           | 0.2581             | 4         | 4         | 4.799    | 21        |  |
| 38 | 1 vs. 30               | 0.7446        | -0.8664           | 0.2581             | 4         | 4         | 4.746    | 21        |  |
| 39 | 1 vs. 60               | 0.7671        | -0.8889           | 0.2581             | 4         | 4         | 4.870    | 21        |  |
| 40 | 3 vs. 5                | 0.03464       | -0.1010           | 0.2581             | 4         | 4         | 0.5531   | 21        |  |
| 41 | 3 vs. 15               | 0.7542        | -0.8205           | 0.2581             | 4         | 4         | 4.495    | 21        |  |
| 42 | 3 vs. 30               | 0.7446        | -0.8109           | 0.2581             | 4         | 4         | 4.442    | 21        |  |
| 43 | 3 vs. 60               | 0.7671        | -0.8334           | 0.2581             | 4         | 4         | 4.566    | 21        |  |
| 44 | 5 vs. 15               | 0.7542        | -0.7195           | 0.2581             | 4         | 4         | 3.942    | 21        |  |
| 45 | 5 vs. 30               | 0.7446        | -0.7099           | 0.2581             | 4         | 4         | 3.889    | 21        |  |
| 46 | 5 vs. 60               | 0.7671        | -0.7324           | 0.2581             | 4         | 4         | 4.012    | 21        |  |
| 47 | 15 vs. 30              | 0.7446        | 0.009566          | 0.2581             | 4         | 4         | 0.05240  | 21        |  |
| 48 | 15 vs. 60              | 0.7671        | -0.01291          | 0.2581             | 4         | 4         | 0.07074  | 21        |  |
| 49 | 30 vs. 60              | 0.7671        | -0.02248          | 0.2581             | 4         | 4         | 0.1231   | 21        |  |
| 50 |                        |               |                   |                    |           |           |          |           |  |
| 51 |                        |               |                   |                    |           |           |          |           |  |
| 52 |                        |               |                   |                    |           |           |          |           |  |
| 53 |                        |               |                   |                    |           |           |          |           |  |
| 54 |                        |               |                   |                    |           |           |          |           |  |
| 55 |                        |               |                   |                    |           |           |          |           |  |
| 56 |                        |               |                   |                    |           |           |          |           |  |
| 57 |                        |               |                   |                    |           |           |          |           |  |
| 58 |                        |               |                   |                    |           |           |          |           |  |
| 59 |                        |               |                   |                    |           |           |          |           |  |

Ordinary one-way ANOVA of Transform of Fo

Row 1, Column A

SourceDataforFigure3B

File Sheet Undo Clipboard Analysis Change Import Draw Write Text Export Print Send LA Help

Prism8

Search

▼ Data Tables >>

- IL6
- TNF
- XO in well
- XO in DC
- + New Data Table...

▼ Info >>

- Project info 1
- Project info 1
- + New Info...

▼ Results >>

- + New Analysis...

▼ Graphs >>

- IL6
- TNF
- XO in well
- XO in DC
- + New Graph...

► Layouts >>

Family >>

- IL6
- IL6

| Table format: |         | Group A | Group B | Group C | Group D | Group E | Group F | Group |
|---------------|---------|---------|---------|---------|---------|---------|---------|-------|
| Grouped       |         | Well    | DC      | Title   | Title   | Title   | Title   | Title |
|               |         | Y       | Y       | Y       | Y       | Y       | Y       | Y     |
| 1             | Control | 19.13   | 13.40   |         |         |         |         |       |
| 2             | XO      | 983.59  | 1135.34 |         |         |         |         |       |
| 3             | Title   |         |         |         |         |         |         |       |
| 4             | Title   |         |         |         |         |         |         |       |
| 5             | Title   |         |         |         |         |         |         |       |
| 6             | Title   |         |         |         |         |         |         |       |
| 7             | Title   |         |         |         |         |         |         |       |
| 8             | Title   |         |         |         |         |         |         |       |
| 9             | Title   |         |         |         |         |         |         |       |
| 10            | Title   |         |         |         |         |         |         |       |
| 11            | Title   |         |         |         |         |         |         |       |
| 12            | Title   |         |         |         |         |         |         |       |
| 13            | Title   |         |         |         |         |         |         |       |
| 14            | Title   |         |         |         |         |         |         |       |
| 15            | Title   |         |         |         |         |         |         |       |
| 16            | Title   |         |         |         |         |         |         |       |
| 17            | Title   |         |         |         |         |         |         |       |
| 18            | Title   |         |         |         |         |         |         |       |
| 19            | Title   |         |         |         |         |         |         |       |
| 20            | Title   |         |         |         |         |         |         |       |
| 21            | Title   |         |         |         |         |         |         |       |
| 22            | Title   |         |         |         |         |         |         |       |
| 23            | Title   |         |         |         |         |         |         |       |
| 24            | Title   |         |         |         |         |         |         |       |

IL6

Row 1, Column RT

SourceDataforFigure3B

File Sheet Undo Clipboard Analysis Change Import Draw Write Text Export Print Send LA Help

Prism8

Search

▼ Data Tables

- IL6
- TNF**
- XO in well
- XO in DC
- + New Data Table...

▼ Info

- Project info 1
- Project info 1
- + New Info...

▼ Results

- + New Analysis...

▼ Graphs

- IL6
- TNF**
- XO in well
- XO in DC
- + New Graph...

► Layouts

Family

- TNF**
- TNF

Table format: Grouped

|    |         | Group A | Group B | Group C | Group D | Group E | Group F | Group G | Group H |
|----|---------|---------|---------|---------|---------|---------|---------|---------|---------|
|    |         | Well    | DC      | Title   | Title   | Title   | Title   | Title   | Title   |
|    |         | Y       | Y       | Y       | Y       | Y       | Y       | Y       | Y       |
| 1  | Control | 3.72    | 2.62    |         |         |         |         |         |         |
| 2  | XO      | 241.61  | 248.27  |         |         |         |         |         |         |
| 3  | Title   |         |         |         |         |         |         |         |         |
| 4  | Title   |         |         |         |         |         |         |         |         |
| 5  | Title   |         |         |         |         |         |         |         |         |
| 6  | Title   |         |         |         |         |         |         |         |         |
| 7  | Title   |         |         |         |         |         |         |         |         |
| 8  | Title   |         |         |         |         |         |         |         |         |
| 9  | Title   |         |         |         |         |         |         |         |         |
| 10 | Title   |         |         |         |         |         |         |         |         |
| 11 | Title   |         |         |         |         |         |         |         |         |
| 12 | Title   |         |         |         |         |         |         |         |         |
| 13 | Title   |         |         |         |         |         |         |         |         |
| 14 | Title   |         |         |         |         |         |         |         |         |
| 15 | Title   |         |         |         |         |         |         |         |         |
| 16 | Title   |         |         |         |         |         |         |         |         |
| 17 | Title   |         |         |         |         |         |         |         |         |
| 18 | Title   |         |         |         |         |         |         |         |         |
| 19 | Title   |         |         |         |         |         |         |         |         |
| 20 | Title   |         |         |         |         |         |         |         |         |
| 21 | Title   |         |         |         |         |         |         |         |         |
| 22 | Title   |         |         |         |         |         |         |         |         |
| 23 | Title   |         |         |         |         |         |         |         |         |
| 24 | Title   |         |         |         |         |         |         |         |         |

TNF

Row 1, Column RT



SourceDataforFigure3B

File Sheet Undo Clipboard Analysis Change Import Draw Write Text Export Print Send LA Help

Prism8

Q Search

▼ Data Tables >>

- IL6
- TNF
- XO in well**
- XO in DC
- + New Data Table...

▼ Info >>

- Project info 1
- Project info 1
- + New Info...

▼ Results >>

- + New Analysis...

▼ Graphs >>

- IL6
- TNF
- XO in well**
- XO in DC
- + New Graph...

► Layouts >>

Family >>

- XO in well**
- XO in well

|    | Group A | Group B | Group C | Group D | Group E | Group F | Group G | Group H | Group I | Group J | Group K |
|----|---------|---------|---------|---------|---------|---------|---------|---------|---------|---------|---------|
|    | Control | XO      | Control | XO      | Title   | Title   | Title   | Title   | Title   | Title   | Title   |
|    | Y       | Y       | Y       | Y       | Y       | Y       | Y       | Y       | Y       | Y       | Y       |
| 1  | 1900    | 1868    | 1880    | 55205   |         |         |         |         |         |         |         |
| 2  |         |         |         |         |         |         |         |         |         |         |         |
| 3  |         |         |         |         |         |         |         |         |         |         |         |
| 4  |         |         |         |         |         |         |         |         |         |         |         |
| 5  |         |         |         |         |         |         |         |         |         |         |         |
| 6  |         |         |         |         |         |         |         |         |         |         |         |
| 7  |         |         |         |         |         |         |         |         |         |         |         |
| 8  |         |         |         |         |         |         |         |         |         |         |         |
| 9  |         |         |         |         |         |         |         |         |         |         |         |
| 10 |         |         |         |         |         |         |         |         |         |         |         |
| 11 |         |         |         |         |         |         |         |         |         |         |         |
| 12 |         |         |         |         |         |         |         |         |         |         |         |
| 13 |         |         |         |         |         |         |         |         |         |         |         |
| 14 |         |         |         |         |         |         |         |         |         |         |         |
| 15 |         |         |         |         |         |         |         |         |         |         |         |
| 16 |         |         |         |         |         |         |         |         |         |         |         |
| 17 |         |         |         |         |         |         |         |         |         |         |         |
| 18 |         |         |         |         |         |         |         |         |         |         |         |
| 19 |         |         |         |         |         |         |         |         |         |         |         |
| 20 |         |         |         |         |         |         |         |         |         |         |         |
| 21 |         |         |         |         |         |         |         |         |         |         |         |
| 22 |         |         |         |         |         |         |         |         |         |         |         |
| 23 |         |         |         |         |         |         |         |         |         |         |         |
| 24 |         |         |         |         |         |         |         |         |         |         |         |

XO in well

Row CT, A: Control

SourceDataforFigure3B

File Sheet Undo Clipboard Analysis Change Import Draw Write Text Export Print Send LA Help

Prism8

Q Search

▼ Data Tables

- IL6
- TNF
- XO in well
- XO in DC**
- + New Data Table...

▼ Info

- Project info 1
- Project info 1
- + New Info...

▼ Results

- + New Analysis...

▼ Graphs

- IL6
- TNF
- XO in well
- XO in DC**
- + New Graph...

► Layouts

Family

- XO in DC**
- XO in DC

|    | Group A | Group B | Group C | Group D | Group E | Group F | Group G | Group H | Group I | Group J | Group K |
|----|---------|---------|---------|---------|---------|---------|---------|---------|---------|---------|---------|
|    | Control | XO      | Control | XO      | Title   | Title   | Title   | Title   | Title   | Title   | Title   |
|    | Y       | Y       | Y       | Y       | Y       | Y       | Y       | Y       | Y       | Y       | Y       |
| 1  | 2012    | 120220  | 1924    | 2238    |         |         |         |         |         |         |         |
| 2  |         |         |         |         |         |         |         |         |         |         |         |
| 3  |         |         |         |         |         |         |         |         |         |         |         |
| 4  |         |         |         |         |         |         |         |         |         |         |         |
| 5  |         |         |         |         |         |         |         |         |         |         |         |
| 6  |         |         |         |         |         |         |         |         |         |         |         |
| 7  |         |         |         |         |         |         |         |         |         |         |         |
| 8  |         |         |         |         |         |         |         |         |         |         |         |
| 9  |         |         |         |         |         |         |         |         |         |         |         |
| 10 |         |         |         |         |         |         |         |         |         |         |         |
| 11 |         |         |         |         |         |         |         |         |         |         |         |
| 12 |         |         |         |         |         |         |         |         |         |         |         |
| 13 |         |         |         |         |         |         |         |         |         |         |         |
| 14 |         |         |         |         |         |         |         |         |         |         |         |
| 15 |         |         |         |         |         |         |         |         |         |         |         |
| 16 |         |         |         |         |         |         |         |         |         |         |         |
| 17 |         |         |         |         |         |         |         |         |         |         |         |
| 18 |         |         |         |         |         |         |         |         |         |         |         |
| 19 |         |         |         |         |         |         |         |         |         |         |         |
| 20 |         |         |         |         |         |         |         |         |         |         |         |
| 21 |         |         |         |         |         |         |         |         |         |         |         |
| 22 |         |         |         |         |         |         |         |         |         |         |         |
| 23 |         |         |         |         |         |         |         |         |         |         |         |
| 24 |         |         |         |         |         |         |         |         |         |         |         |

XO in DC

Row CT, C: Control
