# Supplementary material for: Malaria inflammation by xanthine oxidase‐produced reactive oxygen species
Source: PubMed Central journal article supplement (PMC6685105; doi:10.15252/emmm.201809903), 2019-07-02
Supplement: EMMM-11-e9903-s005.pdf [file EMMM-11-e9903-s005.pdf]

SourceDataforFigure4A

Prism 8

File Sheet Undo Clipboard Analysis Change Import Draw Write Text Export Print Send LA Help

12 Helvetica

Search

Table format: XY

▼ Data Tables

- 1hr ROS fold change vs IL-8
- 1hr ROS fold change vs TNF
- New Data Table...

▼ Info

- Project info 1
- Project info 1
- New Info...

▼ Results

- 1hr ROS fold change of Linear reg. of ROS vs TNF
- 1hr ROS fold change of Linear reg. of ROS vs IL-8
- New Analysis...

▼ Graphs

- 1hr ROS fold change vs IL-8
- 1hr ROS fold change vs TNF
- New Graph...

▼ Layouts

- New Layout...

Family

- 1hr ROS fold change vs IL-8
- 1hr ROS fold change of Linear reg. of ROS vs IL-8
- 1hr ROS fold change vs IL-8

|    |          | X           | Group A | Group B | Group C | Group D | Group E | Group F | Group G | Group H | Group I | Group J | Group K | Group L | Group M |
|----|----------|-------------|---------|---------|---------|---------|---------|---------|---------|---------|---------|---------|---------|---------|---------|
|    |          | ROS         | IL-8    | Title   | Title   | Title   | Title   | Title   | Title   | Title   | Title   | Title   | Title   | Title   | Title   |
|    |          | X           | Y       | Y       | Y       | Y       | Y       | Y       | Y       | Y       | Y       | Y       | Y       | Y       | Y       |
| 1  | 10551    | 0.439473968 | 61.60   |         |         |         |         |         |         |         |         |         |         |         |         |
| 2  | HRSH     | 0.554920772 | 292.56  |         |         |         |         |         |         |         |         |         |         |         |         |
| 3  | 61439    | 0.452085804 | 300.64  |         |         |         |         |         |         |         |         |         |         |         |         |
| 4  | 61484    | 0.653875175 | 875.76  |         |         |         |         |         |         |         |         |         |         |         |         |
| 5  | 61495    | 0.841920880 | 684.36  |         |         |         |         |         |         |         |         |         |         |         |         |
| 6  | 10868    | 0.699795192 | 34.04   |         |         |         |         |         |         |         |         |         |         |         |         |
| 7  | SR/SM    | 0.545542740 | 161.24  |         |         |         |         |         |         |         |         |         |         |         |         |
| 8  | SH/OR    | 0.453379325 | 112.20  |         |         |         |         |         |         |         |         |         |         |         |         |
| 9  | PN/TN    | 0.675541662 | 968.68  |         |         |         |         |         |         |         |         |         |         |         |         |
| 10 | PI/AB/BF | 0.861647084 | 2127.64 |         |         |         |         |         |         |         |         |         |         |         |         |
| 11 | JY/BD    | 0.523876253 | 208.88  |         |         |         |         |         |         |         |         |         |         |         |         |
| 12 | PI/NS/KF | 0.513851461 | 118.60  |         |         |         |         |         |         |         |         |         |         |         |         |
| 13 | TL/MJ    | 0.600194028 | 524.44  |         |         |         |         |         |         |         |         |         |         |         |         |
| 14 | GLOR     | 0.892368222 | 86.00   |         |         |         |         |         |         |         |         |         |         |         |         |
| 15 | VK/KS    | 2.278053250 | 1766.84 |         |         |         |         |         |         |         |         |         |         |         |         |
| 16 | KM/MS    | 1.582947073 | 771.44  |         |         |         |         |         |         |         |         |         |         |         |         |
| 17 | 61941    | 0.734881966 | 495.24  |         |         |         |         |         |         |         |         |         |         |         |         |
| 18 | CH/KL    | 1.099493371 | 809.48  |         |         |         |         |         |         |         |         |         |         |         |         |
| 19 | SS/SN    | 1.003611081 | 1079.68 |         |         |         |         |         |         |         |         |         |         |         |         |
| 20 | KLDD     | 0.652258273 | 804.64  |         |         |         |         |         |         |         |         |         |         |         |         |
| 21 | AR/SN    | 0.672307858 | 460.44  |         |         |         |         |         |         |         |         |         |         |         |         |
| 22 | SN/KM    | 0.905303439 | 236.32  |         |         |         |         |         |         |         |         |         |         |         |         |
| 23 | JY/PR    | 0.607955158 | 0.00    |         |         |         |         |         |         |         |         |         |         |         |         |
| 24 | Title    |             |         |         |         |         |         |         |         |         |         |         |         |         |         |
| 25 | Title    |             |         |         |         |         |         |         |         |         |         |         |         |         |         |
| 26 | Title    |             |         |         |         |         |         |         |         |         |         |         |         |         |         |
| 27 | Title    |             |         |         |         |         |         |         |         |         |         |         |         |         |         |

1hr ROS fold change vs IL-8

Row 1, A: IL-8, Selected: Rows 23, Columns 1

SourceDataforFigure4A

Prism 8

File Sheet Undo Clipboard Analysis Change Import Draw Write Text Export Print Send LA Help

Q Search

▼ Data Tables

- 1hr ROS fold change vs IL-8
- 1hr ROS fold change vs TNF**
- + New Data Table...

▼ Info

- Project info 1
- Project info 1
- + New Info...

▼ Results

- 1hr ROSfold change ofLinear reg. of ROS vs TNF**
- 1hr ROSfold change ofLinear reg. of ROS vs IL-8
- + New Analysis...

▼ Graphs

- 1hr ROS fold change vs IL-8
- 1hr ROS fold change vs TNF**
- + New Graph...

▼ Layouts

- + New Layout...

Family

- 1hr ROS fold change vs TNF**
- 1hr ROSfold change ofLinear reg. of ROS vs TNF
- 1hr ROS fold change vs TNF

| Table format: | X        | Group A     | Group B      | Group C | Group D | Group E | Group F | Group G | Group H | Group I | Group J | Group K | Group L | Group M |
|---------------|----------|-------------|--------------|---------|---------|---------|---------|---------|---------|---------|---------|---------|---------|---------|
| XY            | ROS      | TNF         | Title        | Title   | Title   | Title   | Title   | Title   | Title   | Title   | Title   | Title   | Title   | Title   |
|               | X        | Y           | Y            | Y       | Y       | Y       | Y       | Y       | Y       | Y       | Y       | Y       | Y       | Y       |
| 1             | 10551    | 0.439473968 | 6.320000000  |         |         |         |         |         |         |         |         |         |         |         |
| 2             | HRSH     | 0.554920772 | 6.080000000  |         |         |         |         |         |         |         |         |         |         |         |
| 3             | 61439    | 0.452085804 | 13.200000000 |         |         |         |         |         |         |         |         |         |         |         |
| 4             | 61484    | 0.653875175 | 19.000000000 |         |         |         |         |         |         |         |         |         |         |         |
| 5             | 61495    | 0.841920880 | 9.360000000  |         |         |         |         |         |         |         |         |         |         |         |
| 6             | 10868    | 0.699795192 | 9.080000000  |         |         |         |         |         |         |         |         |         |         |         |
| 7             | SR/SM    | 0.545542740 | 7.840000000  |         |         |         |         |         |         |         |         |         |         |         |
| 8             | SH/OR    | 0.453379325 | 10.400000000 |         |         |         |         |         |         |         |         |         |         |         |
| 9             | PN/TN    | 0.675541662 | 13.200000000 |         |         |         |         |         |         |         |         |         |         |         |
| 10            | PI/AB/BF | 0.861647084 | 23.280000000 |         |         |         |         |         |         |         |         |         |         |         |
| 11            | JY/BD    | 0.523876253 | 12.920000000 |         |         |         |         |         |         |         |         |         |         |         |
| 12            | PI/NS/KF | 0.513851461 | 9.080000000  |         |         |         |         |         |         |         |         |         |         |         |
| 13            | TL/MJ    | 0.600194028 | 9.360000000  |         |         |         |         |         |         |         |         |         |         |         |
| 14            | GLOR     | 0.892368222 | 7.560000000  |         |         |         |         |         |         |         |         |         |         |         |
| 15            | VK/KS    | 2.278053250 | 24.280000000 |         |         |         |         |         |         |         |         |         |         |         |
| 16            | KM/MS    | 1.582947073 | 12.640000000 |         |         |         |         |         |         |         |         |         |         |         |
| 17            | 61941    | 0.734881966 | 12.920000000 |         |         |         |         |         |         |         |         |         |         |         |
| 18            | CH/KL    | 1.099493371 | 16.320000000 |         |         |         |         |         |         |         |         |         |         |         |
| 19            | SS/SN    | 1.003611081 | 13.200000000 |         |         |         |         |         |         |         |         |         |         |         |
| 20            | KLDD     | 0.652258273 | 23.880000000 |         |         |         |         |         |         |         |         |         |         |         |
| 21            | AR/SN    | 0.672307858 | 12.080000000 |         |         |         |         |         |         |         |         |         |         |         |
| 22            | SN/KM    | 0.905303439 | 13.960000000 |         |         |         |         |         |         |         |         |         |         |         |
| 23            | JY/PR    | 0.607955158 | 6.320000000  |         |         |         |         |         |         |         |         |         |         |         |
| 24            | Title    |             |              |         |         |         |         |         |         |         |         |         |         |         |
| 25            | Title    |             |              |         |         |         |         |         |         |         |         |         |         |         |
| 26            | Title    |             |              |         |         |         |         |         |         |         |         |         |         |         |
| 27            | Title    |             |              |         |         |         |         |         |         |         |         |         |         |         |

Row 12, Column C, Selected: Rows 23, Columns 1

SourceDataforFigure4A

Prism 8

File Sheet Undo Clipboard Analysis Interpret Change Draw Write Text Export Print Send LA Help

12 Helvetica

Search

▼ Data Tables

- 1hr ROS fold change vs IL-8
- 1hr ROS fold change vs TNF
- New Data Table...

▼ Info

- Project info 1
- Project info 1
- New Info...

▼ Results

- 1hr ROS fold change of Linear reg. of ROS vs TNF
- 1hr ROS fold change of Linear reg. of ROS vs IL-8
- New Analysis...

▼ Graphs

- 1hr ROS fold change vs IL-8
- 1hr ROS fold change vs TNF
- New Graph...

▼ Layouts

- New Layout...

Family

- 1hr ROS fold change vs TNF
- 1hr ROS fold change of Linear reg. of ROS vs TNF
- 1hr ROS fold change vs TNF

Tabular results

|    |                                         | A                   | B     | C     | D     | E     | F     | G     | H     | I     | J     | K     |
|----|-----------------------------------------|---------------------|-------|-------|-------|-------|-------|-------|-------|-------|-------|-------|
|    | <b>Linear reg.</b>                      |                     |       |       |       |       |       |       |       |       |       |       |
|    | <b>Tabular results</b>                  | <b>TNF</b>          | Title | Title | Title | Title | Title | Title | Title | Title | Title | Title |
|    |                                         | Y                   | Y     | Y     | Y     | Y     | Y     | Y     | Y     | Y     | Y     | Y     |
| 14 | X-intercept                             | -8.252 to -0.2529   |       |       |       |       |       |       |       |       |       |       |
| 15 |                                         |                     |       |       |       |       |       |       |       |       |       |       |
| 16 | <b>Goodness of Fit</b>                  |                     |       |       |       |       |       |       |       |       |       |       |
| 17 | R square                                | 0.2500              |       |       |       |       |       |       |       |       |       |       |
| 18 | Sy.x                                    | 4.839               |       |       |       |       |       |       |       |       |       |       |
| 19 |                                         |                     |       |       |       |       |       |       |       |       |       |       |
| 20 | <b>Is slope significantly non-zero?</b> |                     |       |       |       |       |       |       |       |       |       |       |
| 21 | F                                       | 6.999               |       |       |       |       |       |       |       |       |       |       |
| 22 | DFn, DFd                                | 1, 21               |       |       |       |       |       |       |       |       |       |       |
| 23 | P value                                 | 0.0151              |       |       |       |       |       |       |       |       |       |       |
| 24 | Deviation from zero?                    | Significant         |       |       |       |       |       |       |       |       |       |       |
| 25 |                                         |                     |       |       |       |       |       |       |       |       |       |       |
| 26 | <b>Equation</b>                         | Y = 6.591*X + 7.479 |       |       |       |       |       |       |       |       |       |       |
| 27 |                                         |                     |       |       |       |       |       |       |       |       |       |       |
| 28 | <b>Data</b>                             |                     |       |       |       |       |       |       |       |       |       |       |
| 29 | Number of X values                      | 23                  |       |       |       |       |       |       |       |       |       |       |
| 30 | Maximum number of Y replicates          | 1                   |       |       |       |       |       |       |       |       |       |       |
| 31 | Total number of values                  | 23                  |       |       |       |       |       |       |       |       |       |       |
| 32 | Number of missing values                | 0                   |       |       |       |       |       |       |       |       |       |       |
| 33 |                                         |                     |       |       |       |       |       |       |       |       |       |       |
| 34 |                                         |                     |       |       |       |       |       |       |       |       |       |       |
| 35 |                                         |                     |       |       |       |       |       |       |       |       |       |       |
| 36 |                                         |                     |       |       |       |       |       |       |       |       |       |       |
| 37 |                                         |                     |       |       |       |       |       |       |       |       |       |       |
| 38 |                                         |                     |       |       |       |       |       |       |       |       |       |       |
| 39 |                                         |                     |       |       |       |       |       |       |       |       |       |       |

1hr ROS fold change of Linear reg. of ROS vs TNF

Row 2, A: TNF

SourceDataforFigure4A

Prism 8

File Sheet Undo Clipboard Analysis Interpret Change Draw Write Text Export Print Send LA Help

Search

Tabular results

| Linear reg. Tabular results |                                         | A                   | B     | C     | D     | E     | F     | G     | H     | I     | J     | K     | L     |
|-----------------------------|-----------------------------------------|---------------------|-------|-------|-------|-------|-------|-------|-------|-------|-------|-------|-------|
|                             |                                         | IL-8                | Title | Title | Title | Title | Title | Title | Title | Title | Title | Title | Title |
|                             |                                         | Y                   | Y     | Y     | Y     | Y     | Y     | Y     | Y     | Y     | Y     | Y     | Y     |
| 1                           | <b>Best-fit values</b>                  |                     |       |       |       |       |       |       |       |       |       |       |       |
| 2                           | Slope                                   | 800.7               |       |       |       |       |       |       |       |       |       |       |       |
| 3                           | Y-intercept                             | -70.78              |       |       |       |       |       |       |       |       |       |       |       |
| 4                           | X-intercept                             | 0.08840             |       |       |       |       |       |       |       |       |       |       |       |
| 5                           | 1/slope                                 | 0.001249            |       |       |       |       |       |       |       |       |       |       |       |
| 6                           |                                         |                     |       |       |       |       |       |       |       |       |       |       |       |
| 7                           | <b>Std. Error</b>                       |                     |       |       |       |       |       |       |       |       |       |       |       |
| 8                           | Slope                                   | 230.6               |       |       |       |       |       |       |       |       |       |       |       |
| 9                           | Y-intercept                             | 205.4               |       |       |       |       |       |       |       |       |       |       |       |
| 10                          |                                         |                     |       |       |       |       |       |       |       |       |       |       |       |
| 11                          | <b>95% Confidence Intervals</b>         |                     |       |       |       |       |       |       |       |       |       |       |       |
| 12                          | Slope                                   | 321.1 to 1280       |       |       |       |       |       |       |       |       |       |       |       |
| 13                          | Y-intercept                             | -497.9 to 356.4     |       |       |       |       |       |       |       |       |       |       |       |
| 14                          | X-intercept                             | -1.031 to 0.4188    |       |       |       |       |       |       |       |       |       |       |       |
| 15                          |                                         |                     |       |       |       |       |       |       |       |       |       |       |       |
| 16                          | <b>Goodness of Fit</b>                  |                     |       |       |       |       |       |       |       |       |       |       |       |
| 17                          | R square                                | 0.3647              |       |       |       |       |       |       |       |       |       |       |       |
| 18                          | Sy.x                                    | 447.9               |       |       |       |       |       |       |       |       |       |       |       |
| 19                          |                                         |                     |       |       |       |       |       |       |       |       |       |       |       |
| 20                          | <b>Is slope significantly non-zero?</b> |                     |       |       |       |       |       |       |       |       |       |       |       |
| 21                          | F                                       | 12.06               |       |       |       |       |       |       |       |       |       |       |       |
| 22                          | DFn, DFd                                | 1, 21               |       |       |       |       |       |       |       |       |       |       |       |
| 23                          | P value                                 | 0.0023              |       |       |       |       |       |       |       |       |       |       |       |
| 24                          | Deviation from zero?                    | Significant         |       |       |       |       |       |       |       |       |       |       |       |
| 25                          |                                         |                     |       |       |       |       |       |       |       |       |       |       |       |
| 26                          | <b>Equation</b>                         | Y = 800.7*X - 70.78 |       |       |       |       |       |       |       |       |       |       |       |
| 27                          |                                         |                     |       |       |       |       |       |       |       |       |       |       |       |

1hr ROSfold change of Linear reg. of ROS vs IL-8

Row 2, A: IL-8

SourceDataforFigure4B

File Sheet Undo Clipboard Analysis Change Import Draw Write Text Export Print Send LA Help

Prism8

Search

▼ Data Tables >>

- ROS CM & UM (fold change)
- + New Data Table...

▼ Info >>

- Project info 1
- Project info 1
- + New Info...

▼ Results >>

- Mann-Whitney test of ROS CM & UM (fold change)
- Normality and Lognormality Tests of ROS CM & UM (fold change)
- + New Analysis...

▼ Graphs >>

- ROS CM & UM (fold change)
- Normal QQ plot: Normality and Lognormality Tests of ROS CM & UM (fold change)
- + New Graph...

▼ Layouts >>

- + New Layout...

Family >>

- ROS CM & UM (fold change)
  - Mann-Whitney test
  - Normality and Lognormality Tests
- ROS CM & UM (fold change)
- Normal QQ plot: Normality and Lognormality Tests of ROS CM & UM (fold change)

|    | Group A     | Group B     | Group C | Group D | Group E | Group F | Group G | Group H | Group I | Group J | Group K |
|----|-------------|-------------|---------|---------|---------|---------|---------|---------|---------|---------|---------|
|    | UM          | CM          | Title   | Title   | Title   | Title   | Title   | Title   | Title   | Title   | Title   |
|    | Y           | Y           | Y       | Y       | Y       | Y       | Y       | Y       | Y       | Y       | Y       |
| 1  | 0.439473968 | 0.653875175 |         |         |         |         |         |         |         |         |         |
| 2  | 0.554920772 | 0.675541662 |         |         |         |         |         |         |         |         |         |
| 3  | 0.452085804 | 0.861647084 |         |         |         |         |         |         |         |         |         |
| 4  | 0.841920880 | 0.600194028 |         |         |         |         |         |         |         |         |         |
| 5  | 0.699795192 | 0.892368222 |         |         |         |         |         |         |         |         |         |
| 6  | 0.545542740 | 2.278053250 |         |         |         |         |         |         |         |         |         |
| 7  | 0.453379325 | 1.099493371 |         |         |         |         |         |         |         |         |         |
| 8  | 0.523876253 | 1.003611081 |         |         |         |         |         |         |         |         |         |
| 9  | 0.513851461 | 0.672307858 |         |         |         |         |         |         |         |         |         |
| 10 | 1.582947073 |             |         |         |         |         |         |         |         |         |         |
| 11 | 0.734881966 |             |         |         |         |         |         |         |         |         |         |
| 12 | 0.652258273 |             |         |         |         |         |         |         |         |         |         |
| 13 | 0.905303439 |             |         |         |         |         |         |         |         |         |         |
| 14 | 0.607955158 |             |         |         |         |         |         |         |         |         |         |
| 15 |             |             |         |         |         |         |         |         |         |         |         |
| 16 |             |             |         |         |         |         |         |         |         |         |         |
| 17 |             |             |         |         |         |         |         |         |         |         |         |
| 18 |             |             |         |         |         |         |         |         |         |         |         |
| 19 |             |             |         |         |         |         |         |         |         |         |         |
| 20 |             |             |         |         |         |         |         |         |         |         |         |
| 21 |             |             |         |         |         |         |         |         |         |         |         |
| 22 |             |             |         |         |         |         |         |         |         |         |         |
| 23 |             |             |         |         |         |         |         |         |         |         |         |
| 24 |             |             |         |         |         |         |         |         |         |         |         |
| 25 |             |             |         |         |         |         |         |         |         |         |         |
| 26 |             |             |         |         |         |         |         |         |         |         |         |

ROS CM & UM (fold change) Row 10, A: UM

SourceDataforFigure4B

File Sheet Undo Clipboard Analysis Interpret Change Draw Write Text Export Print Send LA Help

Prism8

Search

▼ Data Tables >>

- ROS CM & UM (fold change)
  - New Data Table...
- ▼ Info >>
  - Project info 1
  - Project info 1
  - New Info...
- ▼ Results >>
  - Mann-Whitney test of ROS CM & UM (fold change)**
  - Normality and Lognormality Tests of ROS CM & UM (fold change)
  - New Analysis...
- ▼ Graphs >>
  - ROS CM & UM (fold change)
  - Normal QQ plot: Normality and Lognormality Tests of ROS CM & UM (fold change)
  - New Graph...
- ▼ Layouts >>
  - New Layout...

Family >>

- ROS CM & UM (fold change)
- Mann-Whitney test**
- ROS CM & UM (fold change)

| Mann-Whitney test |                                     |                           |  |  |  |  |  |  |  |
|-------------------|-------------------------------------|---------------------------|--|--|--|--|--|--|--|
| 1                 | Table Analyzed                      | ROS CM & UM (fold change) |  |  |  |  |  |  |  |
| 2                 |                                     |                           |  |  |  |  |  |  |  |
| 3                 | Column B                            | CM                        |  |  |  |  |  |  |  |
| 4                 | vs.                                 | vs.                       |  |  |  |  |  |  |  |
| 5                 | Column A                            | UM                        |  |  |  |  |  |  |  |
| 6                 |                                     |                           |  |  |  |  |  |  |  |
| 7                 | <b>Mann Whitney test</b>            |                           |  |  |  |  |  |  |  |
| 8                 | P value                             | 0.0275                    |  |  |  |  |  |  |  |
| 9                 | Exact or approximate P value?       | Exact                     |  |  |  |  |  |  |  |
| 10                | P value summary                     | *                         |  |  |  |  |  |  |  |
| 11                | Significantly different (P < 0.05)? | Yes                       |  |  |  |  |  |  |  |
| 12                | One- or two-tailed P value?         | Two-tailed                |  |  |  |  |  |  |  |
| 13                | Sum of ranks in column A,B          | 133 , 143                 |  |  |  |  |  |  |  |
| 14                | Mann-Whitney U                      | 28                        |  |  |  |  |  |  |  |
| 15                |                                     |                           |  |  |  |  |  |  |  |
| 16                | <b>Difference between medians</b>   |                           |  |  |  |  |  |  |  |
| 17                | Median of column A                  | 0.5814, n=14              |  |  |  |  |  |  |  |
| 18                | Median of column B                  | 0.8616, n=9               |  |  |  |  |  |  |  |
| 19                | Difference: Actual                  | 0.2802                    |  |  |  |  |  |  |  |
| 20                | Difference: Hodges-Lehmann          | 0.2011                    |  |  |  |  |  |  |  |
| 21                |                                     |                           |  |  |  |  |  |  |  |
| 22                |                                     |                           |  |  |  |  |  |  |  |
| 23                |                                     |                           |  |  |  |  |  |  |  |
| 24                |                                     |                           |  |  |  |  |  |  |  |
| 25                |                                     |                           |  |  |  |  |  |  |  |
| 26                |                                     |                           |  |  |  |  |  |  |  |

Mann-Whitney test of ROS CM & UM (fold ch

Row 1, Column RT

SourceDataforFigure4B

File Sheet Undo Clipboard Analysis Interpret Change Draw Write Text Export Print Send LA Help

Prism8

Search

▼ Data Tables >>

- ROS CM & UM (fold change)
- New Data Table...

▼ Info >>

- Project info 1
- Project info 1
- New Info...

▼ Results >>

- Mann-Whitney test of ROS CM & UM (fold change)
- Normality and Lognormality Tests of ROS CM & UM (fold change)**
- New Analysis...

▼ Graphs >>

- ROS CM & UM (fold change)
- Normal QQ plot: Normality and Lognormality Tests of ROS CM & UM (fold change)**
- New Graph...

▼ Layouts >>

- New Layout...

Family >>

- ROS CM & UM (fold change)
- Normality and Lognormality Tests**
- Normal QQ plot: Normality and Lognormality Tests of ROS CM & UM (fold change)

Tabular results

| Normality and Lognormality Tests |                                      | A       | B      | C     | D     | E     | F     | G     | H     |
|----------------------------------|--------------------------------------|---------|--------|-------|-------|-------|-------|-------|-------|
| Tabular results                  |                                      | UM      | CM     | Title | Title | Title | Title | Title | Title |
|                                  |                                      | Y       | Y      | Y     | Y     | Y     | Y     | Y     | Y     |
| 1                                | <b>Test for normal distribution</b>  |         |        |       |       |       |       |       |       |
| 2                                | <b>Anderson-Darling test</b>         |         |        |       |       |       |       |       |       |
| 3                                | A2*                                  | 1.232   | 1.158  |       |       |       |       |       |       |
| 4                                | P value                              | 0.0021  | 0.0024 |       |       |       |       |       |       |
| 5                                | Passed normality test (alpha=0.05)?  | No      | No     |       |       |       |       |       |       |
| 6                                | P value summary                      | **      | **     |       |       |       |       |       |       |
| 7                                |                                      |         |        |       |       |       |       |       |       |
| 8                                | <b>D'Agostino &amp; Pearson test</b> |         |        |       |       |       |       |       |       |
| 9                                | K2                                   | 21.58   | 17.98  |       |       |       |       |       |       |
| 10                               | P value                              | <0.0001 | 0.0001 |       |       |       |       |       |       |
| 11                               | Passed normality test (alpha=0.05)?  | No      | No     |       |       |       |       |       |       |
| 12                               | P value summary                      | ****    | ***    |       |       |       |       |       |       |
| 13                               |                                      |         |        |       |       |       |       |       |       |
| 14                               | <b>Shapiro-Wilk test</b>             |         |        |       |       |       |       |       |       |
| 15                               | W                                    | 0.7321  | 0.6878 |       |       |       |       |       |       |
| 16                               | P value                              | 0.0008  | 0.0010 |       |       |       |       |       |       |
| 17                               | Passed normality test (alpha=0.05)?  | No      | No     |       |       |       |       |       |       |
| 18                               | P value summary                      | ***     | **     |       |       |       |       |       |       |
| 19                               |                                      |         |        |       |       |       |       |       |       |
| 20                               | <b>Kolmogorov-Smirnov test</b>       |         |        |       |       |       |       |       |       |
| 21                               | KS distance                          | 0.2114  | 0.2910 |       |       |       |       |       |       |
| 22                               | P value                              | 0.0903  | 0.0269 |       |       |       |       |       |       |
| 23                               | Passed normality test (alpha=0.05)?  | Yes     | No     |       |       |       |       |       |       |
| 24                               | P value summary                      | ns      | *      |       |       |       |       |       |       |
| 25                               |                                      |         |        |       |       |       |       |       |       |

Normality and Lognormality Tests of ROS CM & UM

Row 1, A: UM

SourceDataforFigure4C — Edited

File Sheet Undo Clipboard Analysis Change Import Draw Write Text Export Print Send LA Help

Prism8

Search

▼ Data Tables

- TNF
- IL-6
- IL-10
- IL-8
- New Data Table...

▼ Info

- Project info 1
- Project info 1
- New Info...

▼ Results

- Unpaired t test of TNF
- Unpaired t test of IL-6
- Unpaired t test of IL-10
- Unpaired t test of IL-8
- Unpaired t test of IL-8

Family

- TNF
- Unpaired t test
- Unpaired t test
- Unpaired t test
- Unpaired t test

|    |     | Group A | Group B | Group C | Group D | Group E | Group F | Group G | Group H | Group I | Group J | Group K | Group L | Group M | Group N | Group O | Group P |
|----|-----|---------|---------|---------|---------|---------|---------|---------|---------|---------|---------|---------|---------|---------|---------|---------|---------|
|    |     | HP      | HP+Feb  | P1      | P1+Feb  | P2      | P2+Feb  | P3      | P3+Feb  | LPS     | LPS+Feb | Title   | Title   | Title   | Title   | Title   | Title   |
|    |     | Y       | Y       | Y       | Y       | Y       | Y       | Y       | Y       | Y       | Y       | Y       | Y       | Y       | Y       | Y       | Y       |
| 1  | Tid | 2.46    | 3.68    | 82.52   | 32.26   | 34.39   | 24.19   | 10.14   | 6.32    | 708.63  | 1059.28 |         |         |         |         |         |         |
| 2  | Tid | 3.16    | 7.36    | 67.73   | 23.91   | 33.31   | 18.15   | 8.19    | 5.46    | 600.55  | 962.87  |         |         |         |         |         |         |
| 3  | Tid | 4.77    | 7.68    | 67.73   | 25.75   | 32.61   | 19.55   | 5.46    | 4.43    | 554.26  | 903.71  |         |         |         |         |         |         |
| 4  | Tid |         |         |         |         |         |         |         |         |         |         |         |         |         |         |         |         |
| 5  | Tid |         |         |         |         |         |         |         |         |         |         |         |         |         |         |         |         |
| 6  | Tid |         |         |         |         |         |         |         |         |         |         |         |         |         |         |         |         |
| 7  | Tid |         |         |         |         |         |         |         |         |         |         |         |         |         |         |         |         |
| 8  | Tid |         |         |         |         |         |         |         |         |         |         |         |         |         |         |         |         |
| 9  | Tid |         |         |         |         |         |         |         |         |         |         |         |         |         |         |         |         |
| 10 | Tid |         |         |         |         |         |         |         |         |         |         |         |         |         |         |         |         |
| 11 | Tid |         |         |         |         |         |         |         |         |         |         |         |         |         |         |         |         |
| 12 | Tid |         |         |         |         |         |         |         |         |         |         |         |         |         |         |         |         |
| 13 | Tid |         |         |         |         |         |         |         |         |         |         |         |         |         |         |         |         |
| 14 | Tid |         |         |         |         |         |         |         |         |         |         |         |         |         |         |         |         |
| 15 | Tid |         |         |         |         |         |         |         |         |         |         |         |         |         |         |         |         |
| 16 | Tid |         |         |         |         |         |         |         |         |         |         |         |         |         |         |         |         |
| 17 | Tid |         |         |         |         |         |         |         |         |         |         |         |         |         |         |         |         |
| 18 | Tid |         |         |         |         |         |         |         |         |         |         |         |         |         |         |         |         |
| 19 | Tid |         |         |         |         |         |         |         |         |         |         |         |         |         |         |         |         |
| 20 | Tid |         |         |         |         |         |         |         |         |         |         |         |         |         |         |         |         |
| 21 | Tid |         |         |         |         |         |         |         |         |         |         |         |         |         |         |         |         |
| 22 | Tid |         |         |         |         |         |         |         |         |         |         |         |         |         |         |         |         |
| 23 | Tid |         |         |         |         |         |         |         |         |         |         |         |         |         |         |         |         |
| 24 | Tid |         |         |         |         |         |         |         |         |         |         |         |         |         |         |         |         |
| 25 | Tid |         |         |         |         |         |         |         |         |         |         |         |         |         |         |         |         |
| 26 | Tid |         |         |         |         |         |         |         |         |         |         |         |         |         |         |         |         |
| 27 | Tid |         |         |         |         |         |         |         |         |         |         |         |         |         |         |         |         |
| 28 | Tid |         |         |         |         |         |         |         |         |         |         |         |         |         |         |         |         |
| 29 | Tid |         |         |         |         |         |         |         |         |         |         |         |         |         |         |         |         |
| 30 | Tid |         |         |         |         |         |         |         |         |         |         |         |         |         |         |         |         |
| 31 | Tid |         |         |         |         |         |         |         |         |         |         |         |         |         |         |         |         |
| 32 | Tid |         |         |         |         |         |         |         |         |         |         |         |         |         |         |         |         |
| 33 | Tid |         |         |         |         |         |         |         |         |         |         |         |         |         |         |         |         |

Row 1, Column RT



SourceDataforFigure4C — Edited

File Sheet Undo Clipboard Analysis Change Import Draw Write Text Export Print Send LA Help

Prism8

Search

▼ Data Tables >>

- TNF
- IL-6**
- IL-10
- IL-8
- + New Data Table...

▼ Info >>

- Project info 1
- Project info 1
- + New Info...

▼ Results >>

- Unpaired t test of TNF
- Unpaired t test of IL-6**
- Unpaired t test of IL-10
- Unpaired t test of IL-8
- Unpaired t test of IL-8

Family >>

- IL-6**
  - Unpaired t test
  - Unpaired t test
  - Unpaired t test
  - Unpaired t test

|    |     | Group A | Group B | Group C | Group D | Group E | Group F | Group G | Group H | Group I | Group J | Group K | Group L | Group M | Group N | Group O | Group P |
|----|-----|---------|---------|---------|---------|---------|---------|---------|---------|---------|---------|---------|---------|---------|---------|---------|---------|
|    |     | HP      | HP+Feb  | P1      | P1+Feb  | P2      | P2+Feb  | P3      | P3+Feb  | LPS     | LPS+Feb | Title   | Title   | Title   | Title   | Title   | Title   |
|    |     | Y       | Y       | Y       | Y       | Y       | Y       | Y       | Y       | Y       | Y       | Y       | Y       | Y       | Y       | Y       | Y       |
| 1  | Tid | 1.56    | 0.00    | 235.35  | 170.57  | 38.21   | 45.51   | 10.34   | 6.27    | 2704.49 | 3736.62 |         |         |         |         |         |         |
| 2  | Tid | 1.39    | 4.36    | 220.52  | 125.46  | 36.73   | 30.19   | 8.73    | 5.15    | 2172.81 | 2964.67 |         |         |         |         |         |         |
| 3  | Tid | 1.43    | 0.00    | 172.07  | 131.12  | 29.58   | 29.73   | 6.01    | 3.32    | 2273.80 | 2897.29 |         |         |         |         |         |         |
| 4  | Tid |         |         |         |         |         |         |         |         |         |         |         |         |         |         |         |         |
| 5  | Tid |         |         |         |         |         |         |         |         |         |         |         |         |         |         |         |         |
| 6  | Tid |         |         |         |         |         |         |         |         |         |         |         |         |         |         |         |         |
| 7  | Tid |         |         |         |         |         |         |         |         |         |         |         |         |         |         |         |         |
| 8  | Tid |         |         |         |         |         |         |         |         |         |         |         |         |         |         |         |         |
| 9  | Tid |         |         |         |         |         |         |         |         |         |         |         |         |         |         |         |         |
| 10 | Tid |         |         |         |         |         |         |         |         |         |         |         |         |         |         |         |         |
| 11 | Tid |         |         |         |         |         |         |         |         |         |         |         |         |         |         |         |         |
| 12 | Tid |         |         |         |         |         |         |         |         |         |         |         |         |         |         |         |         |
| 13 | Tid |         |         |         |         |         |         |         |         |         |         |         |         |         |         |         |         |
| 14 | Tid |         |         |         |         |         |         |         |         |         |         |         |         |         |         |         |         |
| 15 | Tid |         |         |         |         |         |         |         |         |         |         |         |         |         |         |         |         |
| 16 | Tid |         |         |         |         |         |         |         |         |         |         |         |         |         |         |         |         |
| 17 | Tid |         |         |         |         |         |         |         |         |         |         |         |         |         |         |         |         |
| 18 | Tid |         |         |         |         |         |         |         |         |         |         |         |         |         |         |         |         |
| 19 | Tid |         |         |         |         |         |         |         |         |         |         |         |         |         |         |         |         |
| 20 | Tid |         |         |         |         |         |         |         |         |         |         |         |         |         |         |         |         |
| 21 | Tid |         |         |         |         |         |         |         |         |         |         |         |         |         |         |         |         |
| 22 | Tid |         |         |         |         |         |         |         |         |         |         |         |         |         |         |         |         |
| 23 | Tid |         |         |         |         |         |         |         |         |         |         |         |         |         |         |         |         |
| 24 | Tid |         |         |         |         |         |         |         |         |         |         |         |         |         |         |         |         |
| 25 | Tid |         |         |         |         |         |         |         |         |         |         |         |         |         |         |         |         |
| 26 | Tid |         |         |         |         |         |         |         |         |         |         |         |         |         |         |         |         |
| 27 | Tid |         |         |         |         |         |         |         |         |         |         |         |         |         |         |         |         |
| 28 | Tid |         |         |         |         |         |         |         |         |         |         |         |         |         |         |         |         |
| 29 | Tid |         |         |         |         |         |         |         |         |         |         |         |         |         |         |         |         |
| 30 | Tid |         |         |         |         |         |         |         |         |         |         |         |         |         |         |         |         |
| 31 | Tid |         |         |         |         |         |         |         |         |         |         |         |         |         |         |         |         |
| 32 | Tid |         |         |         |         |         |         |         |         |         |         |         |         |         |         |         |         |
| 33 | Tid |         |         |         |         |         |         |         |         |         |         |         |         |         |         |         |         |

IL-6

Row 1, Column RT

File Sheet Undo Clipboard Analysis Change Import Draw Write Text Export Print Send LA Help

Analyze Analyze #.## 123 f29

13 Arial

Prism8

Search

Data Tables

- TNF
- IL-6
- IL-10**
- IL-8
- New Data Table...
- Info
  - Project info 1
  - Project info 1
  - New Info...
- Results
  - Unpaired t test of TNF
  - Unpaired t test of IL-6
  - Unpaired t test of IL-10**
  - Unpaired t test of IL-8
  - Unpaired t test of IL-8

Family

- IL-10**
  - Unpaired t test
  - Unpaired t test
  - Unpaired t test
  - Unpaired t test

|    |     | Group A | Group B | Group C | Group D | Group E | Group F | Group G | Group H | Group I | Group J | Group K | Group L | Group M | Group N | Group O | Group P |
|----|-----|---------|---------|---------|---------|---------|---------|---------|---------|---------|---------|---------|---------|---------|---------|---------|---------|
|    |     | HP      | HP+Feb  | P1      | P1+Feb  | P2      | P2+Feb  | P3      | P3+Feb  | LPS     | LPS+Feb | Title   | Title   | Title   | Title   | Title   | Title   |
|    |     | Y       | Y       | Y       | Y       | Y       | Y       | Y       | Y       | Y       | Y       | Y       | Y       | Y       | Y       | Y       | Y       |
| 1  | Tid | 0.00    | 0.00    | 4.83    | 3.65    | 2.43    | 1.74    | 1.27    | 0.00    | 20.85   | 32.85   |         |         |         |         |         |         |
| 2  | Tid | 0.00    | 0.00    | 4.95    | 2.06    | 1.47    | 1.71    | 0.00    | 1.53    | 16.01   | 25.50   |         |         |         |         |         |         |
| 3  | Tid | 1.27    | 0.00    | 3.34    | 1.65    | 1.77    | 0.00    | 0.00    | 0.00    | 15.31   | 23.14   |         |         |         |         |         |         |
| 4  | Tid |         |         |         |         |         |         |         |         |         |         |         |         |         |         |         |         |
| 5  | Tid |         |         |         |         |         |         |         |         |         |         |         |         |         |         |         |         |
| 6  | Tid |         |         |         |         |         |         |         |         |         |         |         |         |         |         |         |         |
| 7  | Tid |         |         |         |         |         |         |         |         |         |         |         |         |         |         |         |         |
| 8  | Tid |         |         |         |         |         |         |         |         |         |         |         |         |         |         |         |         |
| 9  | Tid |         |         |         |         |         |         |         |         |         |         |         |         |         |         |         |         |
| 10 | Tid |         |         |         |         |         |         |         |         |         |         |         |         |         |         |         |         |
| 11 | Tid |         |         |         |         |         |         |         |         |         |         |         |         |         |         |         |         |
| 12 | Tid |         |         |         |         |         |         |         |         |         |         |         |         |         |         |         |         |
| 13 | Tid |         |         |         |         |         |         |         |         |         |         |         |         |         |         |         |         |
| 14 | Tid |         |         |         |         |         |         |         |         |         |         |         |         |         |         |         |         |
| 15 | Tid |         |         |         |         |         |         |         |         |         |         |         |         |         |         |         |         |
| 16 | Tid |         |         |         |         |         |         |         |         |         |         |         |         |         |         |         |         |
| 17 | Tid |         |         |         |         |         |         |         |         |         |         |         |         |         |         |         |         |
| 18 | Tid |         |         |         |         |         |         |         |         |         |         |         |         |         |         |         |         |
| 19 | Tid |         |         |         |         |         |         |         |         |         |         |         |         |         |         |         |         |
| 20 | Tid |         |         |         |         |         |         |         |         |         |         |         |         |         |         |         |         |
| 21 | Tid |         |         |         |         |         |         |         |         |         |         |         |         |         |         |         |         |
| 22 | Tid |         |         |         |         |         |         |         |         |         |         |         |         |         |         |         |         |
| 23 | Tid |         |         |         |         |         |         |         |         |         |         |         |         |         |         |         |         |
| 24 | Tid |         |         |         |         |         |         |         |         |         |         |         |         |         |         |         |         |
| 25 | Tid |         |         |         |         |         |         |         |         |         |         |         |         |         |         |         |         |
| 26 | Tid |         |         |         |         |         |         |         |         |         |         |         |         |         |         |         |         |
| 27 | Tid |         |         |         |         |         |         |         |         |         |         |         |         |         |         |         |         |
| 28 | Tid |         |         |         |         |         |         |         |         |         |         |         |         |         |         |         |         |
| 29 | Tid |         |         |         |         |         |         |         |         |         |         |         |         |         |         |         |         |
| 30 | Tid |         |         |         |         |         |         |         |         |         |         |         |         |         |         |         |         |
| 31 | Tid |         |         |         |         |         |         |         |         |         |         |         |         |         |         |         |         |
| 32 | Tid |         |         |         |         |         |         |         |         |         |         |         |         |         |         |         |         |
| 33 | Tid |         |         |         |         |         |         |         |         |         |         |         |         |         |         |         |         |

SourceDataforFigure4C — Edited

File Sheet Undo Clipboard Analysis Change Import Draw Write Text Export Print Send LA Help

Prism8

Search

▼ Data Tables

- TNF
- IL-6
- IL-10
- IL-8**
- + New Data Table...

▼ Info

- Project info 1
- Project info 1
- + New Info...

▼ Results

- Unpaired t test of TNF
- Unpaired t test of IL-6
- Unpaired t test of IL-10
- Unpaired t test of IL-8**
- Unpaired t test of IL-8**

Family

- IL-8**
  - Unpaired t test
  - Unpaired t test
  - Unpaired t test
  - Unpaired t test

|    | Group A | Group B | Group C  | Group D  | Group E | Group F | Group G | Group H | Group I  | Group J   | Group K | Group L | Group M | Group N | Group O | Group P |
|----|---------|---------|----------|----------|---------|---------|---------|---------|----------|-----------|---------|---------|---------|---------|---------|---------|
|    | HP      | HP+Feb  | P1       | P1+Feb   | P2      | P2+Feb  | P3      | P3+Feb  | LPS      | LPS+Feb   | Title   | Title   | Title   | Title   | Title   | Title   |
| 1  | Y       | Y       | Y        | Y        | Y       | Y       | Y       | Y       | Y        | Y         | Y       | Y       | Y       | Y       | Y       | Y       |
| 2  | 1293.82 | 1176.32 | 42773.56 | 21099.54 | 8676.81 | 7928.11 | 2957.96 | 2691.07 | 79861.38 | 368284.25 |         |         |         |         |         |         |
| 3  | 1200.67 | 1238.34 | 51904.42 | 13305.40 | 7586.18 | 4919.94 | 2850.24 | 2058.00 | 67961.80 | 232309.76 |         |         |         |         |         |         |
| 4  | 998.05  | 802.34  | 24511.54 | 11202.16 | 5143.30 | 4510.70 | 1962.76 | 1671.08 | 58329.38 | 169431.43 |         |         |         |         |         |         |
| 5  | Tid     |         |          |          |         |         |         |         |          |           |         |         |         |         |         |         |
| 6  | Tid     |         |          |          |         |         |         |         |          |           |         |         |         |         |         |         |
| 7  | Tid     |         |          |          |         |         |         |         |          |           |         |         |         |         |         |         |
| 8  | Tid     |         |          |          |         |         |         |         |          |           |         |         |         |         |         |         |
| 9  | Tid     |         |          |          |         |         |         |         |          |           |         |         |         |         |         |         |
| 10 | Tid     |         |          |          |         |         |         |         |          |           |         |         |         |         |         |         |
| 11 | Tid     |         |          |          |         |         |         |         |          |           |         |         |         |         |         |         |
| 12 | Tid     |         |          |          |         |         |         |         |          |           |         |         |         |         |         |         |
| 13 | Tid     |         |          |          |         |         |         |         |          |           |         |         |         |         |         |         |
| 14 | Tid     |         |          |          |         |         |         |         |          |           |         |         |         |         |         |         |
| 15 | Tid     |         |          |          |         |         |         |         |          |           |         |         |         |         |         |         |
| 16 | Tid     |         |          |          |         |         |         |         |          |           |         |         |         |         |         |         |
| 17 | Tid     |         |          |          |         |         |         |         |          |           |         |         |         |         |         |         |
| 18 | Tid     |         |          |          |         |         |         |         |          |           |         |         |         |         |         |         |
| 19 | Tid     |         |          |          |         |         |         |         |          |           |         |         |         |         |         |         |
| 20 | Tid     |         |          |          |         |         |         |         |          |           |         |         |         |         |         |         |
| 21 | Tid     |         |          |          |         |         |         |         |          |           |         |         |         |         |         |         |
| 22 | Tid     |         |          |          |         |         |         |         |          |           |         |         |         |         |         |         |
| 23 | Tid     |         |          |          |         |         |         |         |          |           |         |         |         |         |         |         |
| 24 | Tid     |         |          |          |         |         |         |         |          |           |         |         |         |         |         |         |
| 25 | Tid     |         |          |          |         |         |         |         |          |           |         |         |         |         |         |         |
| 26 | Tid     |         |          |          |         |         |         |         |          |           |         |         |         |         |         |         |
| 27 | Tid     |         |          |          |         |         |         |         |          |           |         |         |         |         |         |         |
| 28 | Tid     |         |          |          |         |         |         |         |          |           |         |         |         |         |         |         |
| 29 | Tid     |         |          |          |         |         |         |         |          |           |         |         |         |         |         |         |
| 30 | Tid     |         |          |          |         |         |         |         |          |           |         |         |         |         |         |         |
| 31 | Tid     |         |          |          |         |         |         |         |          |           |         |         |         |         |         |         |
| 32 | Tid     |         |          |          |         |         |         |         |          |           |         |         |         |         |         |         |
| 33 | Tid     |         |          |          |         |         |         |         |          |           |         |         |         |         |         |         |

IL-8

Row 1, Column RT

File Sheet Undo Clipboard Analysis Interpret Change Draw Write Text Export Print Send LA Help

13 Arial

Search

▼ Data Tables >>

- TNF
- IL-6
- IL-10
- IL-8
- + New Data Table...

▼ Info >>

- Project info 1
- Project info 1
- + New Info...

▼ Results >>

- Unpaired t test of TNF**
- Unpaired t test of TNF
- Unpaired t test of IL-6
- Unpaired t test of IL-10
- Unpaired t test of IL-8
- Unpaired t test of IL-8

| Unpaired t test |                                     |                |
|-----------------|-------------------------------------|----------------|
| 1               | Table Analyzed                      | TNF            |
| 2               |                                     |                |
| 3               | Column B                            | HP+Feb         |
| 4               | vs.                                 | vs.            |
| 5               | Column A                            | HP             |
| 6               |                                     |                |
| 7               | <b>Unpaired t test</b>              |                |
| 8               | P value                             | 0.1288         |
| 9               | P value summary                     | ns             |
| 10              | Significantly different (P < 0.05)? | No             |
| 11              | One- or two-tailed P value?         | Two-tailed     |
| 12              | t, df                               | t=1.909, df=4  |
| 13              |                                     |                |
| 14              | <b>How big is the difference?</b>   |                |
| 15              | Mean of column A                    | 3.463          |
| 16              | Mean of column B                    | 6.240          |
| 17              | Difference between means (B - A)    | 2.777 ± 1.454  |
| 18              | 95% confidence interval             | -1.261 to 6.81 |
| 19              | R squared (eta squared)             | 0.4769         |
| 20              |                                     |                |
| 21              | <b>F test to compare variances</b>  |                |
| 22              | F, DFn, Dfd                         | 3.522, 2, 2    |
| 23              | P value                             | 0.4423         |
| 24              | P value summary                     | ns             |
| 25              | Significantly different (P < 0.05)? | No             |
| 26              |                                     |                |
| 27              | <b>Data analyzed</b>                |                |
| 28              | Sample size, column A               | 3              |
| 29              | Sample size, column B               | 3              |
| 30              |                                     |                |
| 31              |                                     |                |
| 32              |                                     |                |
| 33              |                                     |                |

Family >>

- TNF
- Unpaired t test**

SourceDataforFigure4C — Edited

File Sheet Undo Clipboard Analysis Interpret Change Draw Write Text Export Print Send LA Help

13 Arial

Prism8

| Unpaired t test |                                     |                  |
|-----------------|-------------------------------------|------------------|
| 1               | Table Analyzed                      | TNF              |
| 2               |                                     |                  |
| 3               | Column D                            | P1+Feb           |
| 4               | vs.                                 | vs.              |
| 5               | Column C                            | P1               |
| 6               |                                     |                  |
| 7               | <b>Unpaired t test</b>              |                  |
| 8               | P value                             | 0.0012           |
| 9               | P value summary                     | **               |
| 10              | Significantly different (P < 0.05)? | Yes              |
| 11              | One- or two-tailed P value?         | Two-tailed       |
| 12              | t, df                               | t=8.183, df=4    |
| 13              |                                     |                  |
| 14              | <b>How big is the difference?</b>   |                  |
| 15              | Mean of column C                    | 72.66            |
| 16              | Mean of column D                    | 27.31            |
| 17              | Difference between means (D - C)    | -45.35 ± 5.543   |
| 18              | 95% confidence interval             | -60.74 to -29.96 |
| 19              | R squared (eta squared)             | 0.9436           |
| 20              |                                     |                  |
| 21              | <b>F test to compare variances</b>  |                  |
| 22              | F, DFn, Dfd                         | 3.788, 2, 2      |
| 23              | P value                             | 0.4177           |
| 24              | P value summary                     | ns               |
| 25              | Significantly different (P < 0.05)? | No               |
| 26              |                                     |                  |
| 27              | <b>Data analyzed</b>                |                  |
| 28              | Sample size, column C               | 3                |
| 29              | Sample size, column D               | 3                |
| 30              |                                     |                  |
| 31              |                                     |                  |
| 32              |                                     |                  |
| 33              |                                     |                  |

Unpaired t test of TNF Row 9, Column A

File Sheet Undo Clipboard Analysis Interpret Change Draw Write Text Export Print Send LA Help

13 Arial

T T A A B I U X<sup>2</sup> X<sub>2</sub>

Search

- ▼ Data Tables >>
  - TNF
  - IL-6
  - IL-10
  - IL-8
  - + New Data Table...
- ▼ Info >>
  - Project info 1
  - Project info 1
  - + New Info...
- ▼ Results >>
  - Unpaired t test of TNF
  - Unpaired t test of TNF
  - Unpaired t test of TNF
  - Unpaired t test of TNF**
  - Unpaired t test of TNF
  - Unpaired t test of IL-6
  - Unpaired t test of IL-10
  - Unpaired t test of IL-8
  - Unpaired t test of IL-8

| Unpaired t test |                                     |                |
|-----------------|-------------------------------------|----------------|
| 1               | Table Analyzed                      | TNF            |
| 2               |                                     |                |
| 3               | Column H                            | P3+Feb         |
| 4               | vs.                                 | vs.            |
| 5               | Column G                            | P3             |
| 6               |                                     |                |
| 7               | <b>Unpaired t test</b>              |                |
| 8               | P value                             | 0.1592         |
| 9               | P value summary                     | ns             |
| 10              | Significantly different (P < 0.05)? | No             |
| 11              | One- or two-tailed P value?         | Two-tailed     |
| 12              | t, df                               | t=1.727, df=4  |
| 13              |                                     |                |
| 14              | <b>How big is the difference?</b>   |                |
| 15              | Mean of column G                    | 7.930          |
| 16              | Mean of column H                    | 5.403          |
| 17              | Difference between means (H - G)    | -2.527 ± 1.463 |
| 18              | 95% confidence interval             | -6.589 to 1.53 |
| 19              | R squared (eta squared)             | 0.4271         |
| 20              |                                     |                |
| 21              | <b>F test to compare variances</b>  |                |
| 22              | F, DFn, Dfd                         | 6.172, 2, 2    |
| 23              | P value                             | 0.2789         |
| 24              | P value summary                     | ns             |
| 25              | Significantly different (P < 0.05)? | No             |
| 26              |                                     |                |
| 27              | <b>Data analyzed</b>                |                |
| 28              | Sample size, column G               | 3              |
| 29              | Sample size, column H               | 3              |
| 30              |                                     |                |
| 31              |                                     |                |
| 32              |                                     |                |
| 33              |                                     |                |

- Family >>
  - TNF
  - Unpaired t test**

File Sheet Undo Clipboard Analysis Interpret Change Draw Write Text Export Print Send LA Help

13 Arial

T T A A B I U X<sup>2</sup> X<sub>2</sub>

Q Search

▼ Data Tables >>

- TNF
- IL-6
- IL-10
- IL-8
- + New Data Table...

▼ Info >>

- Project info 1
- Project info 1
- + New Info...

▼ Results >>

- Unpaired t test of TNF
- Unpaired t test of TNF
- Unpaired t test of TNF**
- Unpaired t test of TNF
- Unpaired t test of TNF
- Unpaired t test of IL-6
- Unpaired t test of IL-10
- Unpaired t test of IL-8
- Unpaired t test of IL-8

Family >>

- TNF
- Unpaired t test**
- TNF

| Unpaired t test |                                     |                 |
|-----------------|-------------------------------------|-----------------|
| 1               | Table Analyzed                      | TNF             |
| 2               |                                     |                 |
| 3               | Column F                            | P2+Feb          |
| 4               | vs.                                 | vs.             |
| 5               | Column E                            | P2              |
| 6               |                                     |                 |
| 7               | <b>Unpaired t test</b>              |                 |
| 8               | P value                             | 0.0025          |
| 9               | P value summary                     | **              |
| 10              | Significantly different (P < 0.05)? | Yes             |
| 11              | One- or two-tailed P value?         | Two-tailed      |
| 12              | t, df                               | t=6.750, df=4   |
| 13              |                                     |                 |
| 14              | <b>How big is the difference?</b>   |                 |
| 15              | Mean of column E                    | 33.44           |
| 16              | Mean of column F                    | 20.63           |
| 17              | Difference between means (F - E)    | -12.81 ± 1.89   |
| 18              | 95% confidence interval             | -18.07 to -7.55 |
| 19              | R squared (eta squared)             | 0.9193          |
| 20              |                                     |                 |
| 21              | <b>F test to compare variances</b>  |                 |
| 22              | F, DFn, Dfd                         | 12.43, 2, 2     |
| 23              | P value                             | 0.1489          |
| 24              | P value summary                     | ns              |
| 25              | Significantly different (P < 0.05)? | No              |
| 26              |                                     |                 |
| 27              | <b>Data analyzed</b>                |                 |
| 28              | Sample size, column E               | 3               |
| 29              | Sample size, column F               | 3               |
| 30              |                                     |                 |
| 31              |                                     |                 |
| 32              |                                     |                 |
| 33              |                                     |                 |

File Sheet Undo Clipboard Analysis Interpret Change Draw Write Text Export Print Send LA Help

13 Arial

T T A A B I U X<sup>2</sup> X<sub>2</sub>

Q Search

▼ Data Tables >>

- TNF
- IL-6
- IL-10
- IL-8
- + New Data Table...

▼ Info >>

- Project info 1
- Project info 1
- + New Info...

▼ Results >>

- Unpaired t test of TNF
- Unpaired t test of TNF**
- Unpaired t test of IL-6
- Unpaired t test of IL-10
- Unpaired t test of IL-8
- Unpaired t test of IL-8

Family >>

- TNF
- Unpaired t test**
- TNF

| Unpaired t test |                                     |                |
|-----------------|-------------------------------------|----------------|
| 1               | Table Analyzed                      | TNF            |
| 2               |                                     |                |
| 3               | Column J                            | LPS+Feb        |
| 4               | vs.                                 | vs.            |
| 5               | Column I                            | LPS            |
| 6               |                                     |                |
| 7               | <b>Unpaired t test</b>              |                |
| 8               | P value                             | 0.0053         |
| 9               | P value summary                     | **             |
| 10              | Significantly different (P < 0.05)? | Yes            |
| 11              | One- or two-tailed P value?         | Two-tailed     |
| 12              | t, df                               | t=5.499, df=4  |
| 13              |                                     |                |
| 14              | <b>How big is the difference?</b>   |                |
| 15              | Mean of column I                    | 621.1          |
| 16              | Mean of column J                    | 975.3          |
| 17              | Difference between means (J - I) ±  | 354.1 ± 64.40  |
| 18              | 95% confidence interval             | 175.3 to 532.5 |
| 19              | R squared (eta squared)             | 0.8832         |
| 20              |                                     |                |
| 21              | <b>F test to compare variances</b>  |                |
| 22              | F, DFn, Dfd                         | 1.018, 2, 2    |
| 23              | P value                             | 0.9912         |
| 24              | P value summary                     | ns             |
| 25              | Significantly different (P < 0.05)? | No             |
| 26              |                                     |                |
| 27              | <b>Data analyzed</b>                |                |
| 28              | Sample size, column I               | 3              |
| 29              | Sample size, column J               | 3              |
| 30              |                                     |                |
| 31              |                                     |                |
| 32              |                                     |                |
| 33              |                                     |                |



File Sheet Undo Clipboard Analysis Interpret Change Draw Write Text Export Print Send LA Help

13 Arial

T T A A B I U X<sup>2</sup> X<sub>2</sub>

Search

▼ Data Tables >>

- TNF
- IL-6
- IL-10
- IL-8
- + New Data Table...

▼ Info >>

- Project info 1
- Project info 1
- + New Info...

▼ Results >>

- Unpaired t test of TNF
- Unpaired t test of IL-6**
- Unpaired t test of IL-6
- Unpaired t test of IL-10
- Unpaired t test of IL-8
- Unpaired t test of IL-8

| Unpaired t test |                                     |                |
|-----------------|-------------------------------------|----------------|
| 1               | Table Analyzed                      | IL-6           |
| 2               |                                     |                |
| 3               | Column B                            | HP+Feb         |
| 4               | vs.                                 | vs.            |
| 5               | Column A                            | HP             |
| 6               |                                     |                |
| 7               | <b>Unpaired t test</b>              |                |
| 8               | P value                             | 0.9966         |
| 9               | P value summary                     | ns             |
| 10              | Significantly different (P < 0.05)? | No             |
| 11              | One- or two-tailed P value?         | Two-tailed     |
| 12              | t, df                               | t=0.004584, d  |
| 13              |                                     |                |
| 14              | <b>How big is the difference?</b>   |                |
| 15              | Mean of column A                    | 1.460          |
| 16              | Mean of column B                    | 1.453          |
| 17              | Difference between means (B - A)    | -0.006667 ± 1  |
| 18              | 95% confidence interval             | -4.044 to 4.03 |
| 19              | R squared (eta squared)             | 5.254e-006     |
| 20              |                                     |                |
| 21              | <b>F test to compare variances</b>  |                |
| 22              | F, DFn, Dfd                         | 802.1, 2, 2    |
| 23              | P value                             | 0.0025         |
| 24              | P value summary                     | **             |
| 25              | Significantly different (P < 0.05)? | Yes            |
| 26              |                                     |                |
| 27              | <b>Data analyzed</b>                |                |
| 28              | Sample size, column A               | 3              |
| 29              | Sample size, column B               | 3              |
| 30              |                                     |                |
| 31              |                                     |                |
| 32              |                                     |                |
| 33              |                                     |                |

Family >>

- IL-6
- Unpaired t test

File Sheet Undo Clipboard Analysis Interpret Change Draw Write Text Export Print Send LA Help

Clipboard icons: Analyze, Paste, Copy, Undo, Redo, New

Text formatting: Bold, Italic, Underline, Text color, Background color, Bulleted list, Numbered list, Indent, Outdent, Paragraph style

Export: Print, Send, LA, Help

Search

▼ Data Tables >>

- TNF
- IL-6
- IL-10
- IL-8
- + New Data Table...

▼ Info >>

- Project info 1
- Project info 1
- + New Info...

▼ Results >>

- Unpaired t test of TNF
- Unpaired t test of IL-6
- Unpaired t test of IL-6**
- Unpaired t test of IL-6
- Unpaired t test of IL-6
- Unpaired t test of IL-6
- Unpaired t test of IL-10
- Unpaired t test of IL-8
- Unpaired t test of IL-8

Family >>

- IL-6
- Unpaired t test
- IL-6

| Unpaired t test |                                     |                |
|-----------------|-------------------------------------|----------------|
| 1               | Table Analyzed                      | IL-6           |
| 2               |                                     |                |
| 3               | Column D                            | P1+Feb         |
| 4               | vs.                                 | vs.            |
| 5               | Column C                            | P1             |
| 6               |                                     |                |
| 7               | <b>Unpaired t test</b>              |                |
| 8               | P value                             | 0.0482         |
| 9               | P value summary                     | *              |
| 10              | Significantly different (P < 0.05)? | Yes            |
| 11              | One- or two-tailed P value?         | Two-tailed     |
| 12              | t, df                               | t=2.812, df=4  |
| 13              |                                     |                |
| 14              | <b>How big is the difference?</b>   |                |
| 15              | Mean of column C                    | 209.3          |
| 16              | Mean of column D                    | 142.4          |
| 17              | Difference between means (D - C)    | -66.93 ± 23.80 |
| 18              | 95% confidence interval             | -133.0 to -0.8 |
| 19              | R squared (eta squared)             | 0.6641         |
| 20              |                                     |                |
| 21              | <b>F test to compare variances</b>  |                |
| 22              | F, DFn, Dfd                         | 1.814, 2, 2    |
| 23              | P value                             | 0.7108         |
| 24              | P value summary                     | ns             |
| 25              | Significantly different (P < 0.05)? | No             |
| 26              |                                     |                |
| 27              | <b>Data analyzed</b>                |                |
| 28              | Sample size, column C               | 3              |
| 29              | Sample size, column D               | 3              |
| 30              |                                     |                |
| 31              |                                     |                |
| 32              |                                     |                |
| 33              |                                     |                |

File Sheet Undo Clipboard Analysis Interpret Change Draw Write Text Export Print Send LA Help

13 Arial

Search

▼ Data Tables >>

- TNF
- IL-6
- IL-10
- IL-8
- + New Data Table...

▼ Info >>

- Project info 1
- Project info 1
- + New Info...

▼ Results >>

- Unpaired t test of TNF
- Unpaired t test of IL-6
- Unpaired t test of IL-6
- Unpaired t test of IL-6**
- Unpaired t test of IL-6
- Unpaired t test of IL-6
- Unpaired t test of IL-10
- Unpaired t test of IL-8
- Unpaired t test of IL-8

Family >>

- IL-6
- Unpaired t test**

| Unpaired t test |                                     |                |
|-----------------|-------------------------------------|----------------|
| 1               | Table Analyzed                      | IL-6           |
| 2               |                                     |                |
| 3               | Column F                            | P2+Feb         |
| 4               | vs.                                 | vs.            |
| 5               | Column E                            | P2             |
| 6               |                                     |                |
| 7               | <b>Unpaired t test</b>              |                |
| 8               | P value                             | 0.9610         |
| 9               | P value summary                     | ns             |
| 10              | Significantly different (P < 0.05)? | No             |
| 11              | One- or two-tailed P value?         | Two-tailed     |
| 12              | t, df                               | t=0.05203, df= |
| 13              |                                     |                |
| 14              | <b>How big is the difference?</b>   |                |
| 15              | Mean of column E                    | 34.84          |
| 16              | Mean of column F                    | 35.14          |
| 17              | Difference between means (F - E)    | 0.3033 ± 5.83  |
| 18              | 95% confidence interval             | -15.88 to 16.4 |
| 19              | R squared (eta squared)             | 0.0006764      |
| 20              |                                     |                |
| 21              | <b>F test to compare variances</b>  |                |
| 22              | F, DFn, Dfd                         | 3.787, 2, 2    |
| 23              | P value                             | 0.4178         |
| 24              | P value summary                     | ns             |
| 25              | Significantly different (P < 0.05)? | No             |
| 26              |                                     |                |
| 27              | <b>Data analyzed</b>                |                |
| 28              | Sample size, column E               | 3              |
| 29              | Sample size, column F               | 3              |
| 30              |                                     |                |
| 31              |                                     |                |
| 32              |                                     |                |
| 33              |                                     |                |

File Sheet Undo Clipboard Analysis Interpret Change Draw Write Text Export Print Send LA Help

Search

- Data Tables
  - TNF
  - IL-6**
  - IL-10
  - IL-8
  - New Data Table...
- Info
  - Project info 1
  - Project info 1
  - New Info...
- Results
  - Unpaired t test of TNF
  - Unpaired t test of IL-6
  - Unpaired t test of IL-6
  - Unpaired t test of IL-6
  - Unpaired t test of IL-6**
  - Unpaired t test of IL-6
  - Unpaired t test of IL-10
  - Unpaired t test of IL-8
  - Unpaired t test of IL-8

| Unpaired t test |                                     |                |
|-----------------|-------------------------------------|----------------|
| 1               | Table Analyzed                      | IL-6           |
| 2               |                                     |                |
| 3               | Column H                            | P3+Feb         |
| 4               | vs.                                 | vs.            |
| 5               | Column G                            | P3             |
| 6               |                                     |                |
| 7               | <b>Unpaired t test</b>              |                |
| 8               | P value                             | 0.0871         |
| 9               | P value summary                     | ns             |
| 10              | Significantly different (P < 0.05)? | No             |
| 11              | One- or two-tailed P value?         | Two-tailed     |
| 12              | t, df                               | t=2.255, df=4  |
| 13              |                                     |                |
| 14              | <b>How big is the difference?</b>   |                |
| 15              | Mean of column G                    | 8.360          |
| 16              | Mean of column H                    | 4.913          |
| 17              | Difference between means (H - G)    | -3.447 ± 1.528 |
| 18              | 95% confidence interval             | -7.690 to 0.79 |
| 19              | R squared (eta squared)             | 0.5597         |
| 20              |                                     |                |
| 21              | <b>F test to compare variances</b>  |                |
| 22              | F, DFn, Dfd                         | 2.160, 2, 2    |
| 23              | P value                             | 0.6329         |
| 24              | P value summary                     | ns             |
| 25              | Significantly different (P < 0.05)? | No             |
| 26              |                                     |                |
| 27              | <b>Data analyzed</b>                |                |
| 28              | Sample size, column G               | 3              |
| 29              | Sample size, column H               | 3              |
| 30              |                                     |                |
| 31              |                                     |                |
| 32              |                                     |                |
| 33              |                                     |                |

Family

- IL-6
  - Unpaired t test**

Q Search

▼ Data Tables >>

- TNF
- IL-6**
- IL-10
- IL-8
- + New Data Table...

▼ Info >>

- Project info 1
- Project info 1
- + New Info...

▼ Results >>

- Unpaired t test of TNF
- Unpaired t test of IL-6
- Unpaired t test of IL-6**
- Unpaired t test of IL-10
- Unpaired t test of IL-8
- Unpaired t test of IL-8

Family >>

- IL-6
- Unpaired t test**

| Unpaired t test |                                     |                |
|-----------------|-------------------------------------|----------------|
| 1               | Table Analyzed                      | IL-6           |
| 2               |                                     |                |
| 3               | Column J                            | LPS+Feb        |
| 4               | vs.                                 | vs.            |
| 5               | Column I                            | LPS            |
| 6               |                                     |                |
| 7               | <b>Unpaired t test</b>              |                |
| 8               | P value                             | 0.0606         |
| 9               | P value summary                     | ns             |
| 10              | Significantly different (P < 0.05)? | No             |
| 11              | One- or two-tailed P value?         | Two-tailed     |
| 12              | t, df                               | t=2.592, df=4  |
| 13              |                                     |                |
| 14              | <b>How big is the difference?</b>   |                |
| 15              | Mean of column I                    | 2384           |
| 16              | Mean of column J                    | 3200           |
| 17              | Difference between means (J - I) ±  | 815.8 ± 314.8  |
| 18              | 95% confidence interval             | -58.08 to 1690 |
| 19              | R squared (eta squared)             | 0.6268         |
| 20              |                                     |                |
| 21              | <b>F test to compare variances</b>  |                |
| 22              | F, DFn, Dfd                         | 2.728, 2, 2    |
| 23              | P value                             | 0.5365         |
| 24              | P value summary                     | ns             |
| 25              | Significantly different (P < 0.05)? | No             |
| 26              |                                     |                |
| 27              | <b>Data analyzed</b>                |                |
| 28              | Sample size, column I               | 3              |
| 29              | Sample size, column J               | 3              |
| 30              |                                     |                |
| 31              |                                     |                |
| 32              |                                     |                |
| 33              |                                     |                |

File Sheet Undo Clipboard Analysis Interpret Change Draw Write Text Export Print Send LA Help

13 Arial

Search

- Data Tables
  - TNF
  - IL-6
  - IL-10**
  - IL-8
  - New Data Table...
- Info
  - Project info 1
  - Project info 1
  - New Info...
- Results
  - Unpaired t test of TNF
  - Unpaired t test of IL-6
  - Unpaired t test of IL-10**
  - Unpaired t test of IL-10
  - Unpaired t test of IL-8
  - Unpaired t test of IL-8

| Unpaired t test |                                     |                |
|-----------------|-------------------------------------|----------------|
| 1               | Table Analyzed                      | IL-10          |
| 2               |                                     |                |
| 3               | Column B                            | HP+Feb         |
| 4               | vs.                                 | vs.            |
| 5               | Column A                            | HP             |
| 6               |                                     |                |
| 7               | <b>Unpaired t test</b>              |                |
| 8               | P value                             | 0.3739         |
| 9               | P value summary                     | ns             |
| 10              | Significantly different (P < 0.05)? | No             |
| 11              | One- or two-tailed P value?         | Two-tailed     |
| 12              | t, df                               | t=1.000, df=4  |
| 13              |                                     |                |
| 14              | <b>How big is the difference?</b>   |                |
| 15              | Mean of column A                    | 0.4233         |
| 16              | Mean of column B                    | 0.000          |
| 17              | Difference between means (B - A)    | -0.4233 ± 0.42 |
| 18              | 95% confidence interval             | -1.599 to 0.75 |
| 19              | R squared (eta squared)             | 0.2000         |
| 20              |                                     |                |
| 21              | <b>F test to compare variances</b>  |                |
| 22              | F, DFn, Dfd                         | Infinity, 2, 2 |
| 23              | P value                             | <0.0001        |
| 24              | P value summary                     | ****           |
| 25              | Significantly different (P < 0.05)? | Yes            |
| 26              |                                     |                |
| 27              | <b>Data analyzed</b>                |                |
| 28              | Sample size, column A               | 3              |
| 29              | Sample size, column B               | 3              |
| 30              |                                     |                |
| 31              |                                     |                |
| 32              |                                     |                |
| 33              |                                     |                |

- Family
  - IL-10
    - Unpaired t test**

File Sheet Undo Clipboard Analysis Interpret Change Draw Write Text Export Print Send LA Help

13 Arial

Search

▼ Data Tables >>

- TNF
- IL-6
- IL-10**
- IL-8
- + New Data Table...

▼ Info >>

- Project info 1
- Project info 1
- + New Info...

▼ Results >>

- Unpaired t test of TNF
- Unpaired t test of IL-6
- Unpaired t test of IL-10
- Unpaired t test of IL-10**
- Unpaired t test of IL-10
- Unpaired t test of IL-10
- Unpaired t test of IL-10
- Unpaired t test of IL-8
- Unpaired t test of IL-8

Family >>

- IL-10
- Unpaired t test**

| Unpaired t test |                                     |                |
|-----------------|-------------------------------------|----------------|
| 1               | Table Analyzed                      | IL-10          |
| 2               |                                     |                |
| 3               | Column D                            | P1+Feb         |
| 4               | vs.                                 | vs.            |
| 5               | Column C                            | P1             |
| 6               |                                     |                |
| 7               | <b>Unpaired t test</b>              |                |
| 8               | P value                             | 0.0744         |
| 9               | P value summary                     | ns             |
| 10              | Significantly different (P < 0.05)? | No             |
| 11              | One- or two-tailed P value?         | Two-tailed     |
| 12              | t, df                               | t=2.400, df=4  |
| 13              |                                     |                |
| 14              | <b>How big is the difference?</b>   |                |
| 15              | Mean of column C                    | 4.373          |
| 16              | Mean of column D                    | 2.453          |
| 17              | Difference between means (D - C)    | -1.920 ± 0.800 |
| 18              | 95% confidence interval             | -4.141 to 0.30 |
| 19              | R squared (eta squared)             | 0.5901         |
| 20              |                                     |                |
| 21              | <b>F test to compare variances</b>  |                |
| 22              | F, DFn, Dfd                         | 1.387, 2, 2    |
| 23              | P value                             | 0.8377         |
| 24              | P value summary                     | ns             |
| 25              | Significantly different (P < 0.05)? | No             |
| 26              |                                     |                |
| 27              | <b>Data analyzed</b>                |                |
| 28              | Sample size, column C               | 3              |
| 29              | Sample size, column D               | 3              |
| 30              |                                     |                |
| 31              |                                     |                |
| 32              |                                     |                |
| 33              |                                     |                |

File Sheet Undo Clipboard Analysis Interpret Change Draw Write Text Export Print Send LA Help

Clipboard icons: Analyze, Paste, Copy, Undo, Redo, New

Text formatting: Bold, Italic, Underline, Text color, Background color, Font size (13), Arial

Export: Print, Send, LA, Help

Search

- ▼ Data Tables >>
  - TNF
  - IL-6
  - IL-10**
  - IL-8
  - + New Data Table...
- ▼ Info >>
  - Project info 1
  - Project info 1
  - + New Info...
- ▼ Results >>
  - Unpaired t test of TNF
  - Unpaired t test of IL-6
  - Unpaired t test of IL-10
  - Unpaired t test of IL-10
  - Unpaired t test of IL-10**
  - Unpaired t test of IL-10
  - Unpaired t test of IL-10
  - Unpaired t test of IL-8
  - Unpaired t test of IL-8

| Unpaired t test |                                     |                |
|-----------------|-------------------------------------|----------------|
| 1               | Table Analyzed                      | IL-10          |
| 2               |                                     |                |
| 3               | Column F                            | P2+Feb         |
| 4               | vs.                                 | vs.            |
| 5               | Column E                            | P2             |
| 6               |                                     |                |
| 7               | <b>Unpaired t test</b>              |                |
| 8               | P value                             | 0.3127         |
| 9               | P value summary                     | ns             |
| 10              | Significantly different (P < 0.05)? | No             |
| 11              | One- or two-tailed P value?         | Two-tailed     |
| 12              | t, df                               | t=1.154, df=4  |
| 13              |                                     |                |
| 14              | <b>How big is the difference?</b>   |                |
| 15              | Mean of column E                    | 1.890          |
| 16              | Mean of column F                    | 1.150          |
| 17              | Difference between means (F - E)    | -0.7400 ± 0.64 |
| 18              | 95% confidence interval             | -2.520 to 1.04 |
| 19              | R squared (eta squared)             | 0.2498         |
| 20              |                                     |                |
| 21              | <b>F test to compare variances</b>  |                |
| 22              | F, DFn, Dfd                         | 4.113, 2, 2    |
| 23              | P value                             | 0.3911         |
| 24              | P value summary                     | ns             |
| 25              | Significantly different (P < 0.05)? | No             |
| 26              |                                     |                |
| 27              | <b>Data analyzed</b>                |                |
| 28              | Sample size, column E               | 3              |
| 29              | Sample size, column F               | 3              |
| 30              |                                     |                |
| 31              |                                     |                |
| 32              |                                     |                |
| 33              |                                     |                |

- Family >>
  - IL-10
    - Unpaired t test



File Sheet Undo Clipboard Analysis Interpret Change Draw Write Text Export Print Send LA Help

13 Arial

Search

- ▼ Data Tables >>
  - TNF
  - IL-6
  - IL-10**
  - IL-8
  - + New Data Table...
- ▼ Info >>
  - Project info 1
  - Project info 1
  - + New Info...
- ▼ Results >>
  - Unpaired t test of TNF
  - Unpaired t test of IL-6
  - Unpaired t test of IL-10
  - Unpaired t test of IL-10
  - Unpaired t test of IL-10
  - Unpaired t test of IL-10**
  - Unpaired t test of IL-10
  - Unpaired t test of IL-8
  - Unpaired t test of IL-8

| Unpaired t test |                                     |                |
|-----------------|-------------------------------------|----------------|
| 1               | Table Analyzed                      | IL-10          |
| 2               |                                     |                |
| 3               | Column H                            | P3+Feb         |
| 4               | vs.                                 | vs.            |
| 5               | Column G                            | P3             |
| 6               |                                     |                |
| 7               | <b>Unpaired t test</b>              |                |
| 8               | P value                             | 0.9023         |
| 9               | P value summary                     | ns             |
| 10              | Significantly different (P < 0.05)? | No             |
| 11              | One- or two-tailed P value?         | Two-tailed     |
| 12              | t, df                               | t=0.1308, df=  |
| 13              |                                     |                |
| 14              | <b>How big is the difference?</b>   |                |
| 15              | Mean of column G                    | 0.4233         |
| 16              | Mean of column H                    | 0.5100         |
| 17              | Difference between means (H - G)    | 0.08667 ± 0.6  |
| 18              | 95% confidence interval             | -1.754 to 1.92 |
| 19              | R squared (eta squared)             | 0.004256       |
| 20              |                                     |                |
| 21              | <b>F test to compare variances</b>  |                |
| 22              | F, DFn, Dfd                         | 1.451, 2, 2    |
| 23              | P value                             | 0.8159         |
| 24              | P value summary                     | ns             |
| 25              | Significantly different (P < 0.05)? | No             |
| 26              |                                     |                |
| 27              | <b>Data analyzed</b>                |                |
| 28              | Sample size, column G               | 3              |
| 29              | Sample size, column H               | 3              |
| 30              |                                     |                |
| 31              |                                     |                |
| 32              |                                     |                |
| 33              |                                     |                |

- Family >>
  - IL-10
    - Unpaired t test**

File Sheet Undo Clipboard Analysis Interpret Change Draw Write Text Export Print Send LA Help

Clipboard icons: Analyze, Paste, Copy, Undo, Redo, New

Text toolbar: Font size (13), Arial, Bold, Italic, Underline, Text color, Background color, Bullets, Numbered list, Indent, Outdent

Export, Print, Send, LA, Help icons

Q Search

▼ Data Tables >>

- TNF
- IL-6
- IL-10**
- IL-8
- + New Data Table...

▼ Info >>

- Project info 1
- Project info 1
- + New Info...

▼ Results >>

- Unpaired t test of TNF
- Unpaired t test of IL-6
- Unpaired t test of IL-10
- Unpaired t test of IL-10**
- Unpaired t test of IL-8
- Unpaired t test of IL-8

Family >>

- IL-10
- Unpaired t test**
- IL-10

| Unpaired t test |                                     |                |
|-----------------|-------------------------------------|----------------|
| 1               | Table Analyzed                      | IL-10          |
| 2               |                                     |                |
| 3               | Column J                            | LPS+Feb        |
| 4               | vs.                                 | vs.            |
| 5               | Column I                            | LPS            |
| 6               |                                     |                |
| 7               | <b>Unpaired t test</b>              |                |
| 8               | P value                             | 0.0454         |
| 9               | P value summary                     | *              |
| 10              | Significantly different (P < 0.05)? | Yes            |
| 11              | One- or two-tailed P value?         | Two-tailed     |
| 12              | t, df                               | t=2.872, df=4  |
| 13              |                                     |                |
| 14              | <b>How big is the difference?</b>   |                |
| 15              | Mean of column I                    | 17.39          |
| 16              | Mean of column J                    | 27.16          |
| 17              | Difference between means (J - I) ±  | 9.773 ± 3.403  |
| 18              | 95% confidence interval             | 0.3243 to 19.2 |
| 19              | R squared (eta squared)             | 0.6734         |
| 20              |                                     |                |
| 21              | <b>F test to compare variances</b>  |                |
| 22              | F, DFn, Dfd                         | 2.818, 2, 2    |
| 23              | P value                             | 0.5239         |
| 24              | P value summary                     | ns             |
| 25              | Significantly different (P < 0.05)? | No             |
| 26              |                                     |                |
| 27              | <b>Data analyzed</b>                |                |
| 28              | Sample size, column I               | 3              |
| 29              | Sample size, column J               | 3              |
| 30              |                                     |                |
| 31              |                                     |                |
| 32              |                                     |                |
| 33              |                                     |                |

File Sheet Undo Clipboard Analysis Interpret Change Draw Write Text Export Print Send LA Help

13 Arial

T T A A B I U X<sup>2</sup> X<sub>2</sub>

Q Search

▼ Data Tables >>

- TNF
- IL-6
- IL-10
- IL-8
- + New Data Table...

▼ Info >>

- Project info 1
- Project info 1
- + New Info...

▼ Results >>

- Unpaired t test of TNF
- Unpaired t test of IL-6
- Unpaired t test of IL-10
- Unpaired t test of IL-8
- Unpaired t test of IL-8

Family >>

- IL-8
- Unpaired t test

| Unpaired t test |                                     |                |
|-----------------|-------------------------------------|----------------|
| 1               | Table Analyzed                      | IL-8           |
| 2               |                                     |                |
| 3               | Column B                            | HP+Feb         |
| 4               | vs.                                 | vs.            |
| 5               | Column A                            | HP             |
| 6               |                                     |                |
| 7               | <b>Unpaired t test</b>              |                |
| 8               | P value                             | 0.6005         |
| 9               | P value summary                     | ns             |
| 10              | Significantly different (P < 0.05)? | No             |
| 11              | One- or two-tailed P value?         | Two-tailed     |
| 12              | t, df                               | t=0.5678, df=4 |
| 13              |                                     |                |
| 14              | <b>How big is the difference?</b>   |                |
| 15              | Mean of column A                    | 1164           |
| 16              | Mean of column B                    | 1072           |
| 17              | Difference between means (B - A)    | -91.85 ± 161.8 |
| 18              | 95% confidence interval             | -541.0 to 357. |
| 19              | R squared (eta squared)             | 0.07458        |
| 20              |                                     |                |
| 21              | <b>F test to compare variances</b>  |                |
| 22              | F, DFn, Dfd                         | 2.433, 2, 2    |
| 23              | P value                             | 0.5826         |
| 24              | P value summary                     | ns             |
| 25              | Significantly different (P < 0.05)? | No             |
| 26              |                                     |                |
| 27              | <b>Data analyzed</b>                |                |
| 28              | Sample size, column A               | 3              |
| 29              | Sample size, column B               | 3              |
| 30              |                                     |                |
| 31              |                                     |                |
| 32              |                                     |                |
| 33              |                                     |                |

File Sheet Undo Clipboard Analysis Interpret Change Draw Write Text Export Print Send LA Help

Clipboard icons: Copy, Paste, Undo, Redo, New, etc.

Text formatting: Bold, Italic, Underline, Text color, Background color, etc.

Search

- ▼ Results
- Unpaired t test of TNF
- Unpaired t test of IL-6
- Unpaired t test of IL-10
- Unpaired t test of IL-8
- Unpaired t test of IL-8**
- Unpaired t test of IL-8
- + New Analysis...
- ▼ Graphs
- TNF
- IL-6
- IL-10
- IL-8**
- + New Graph...
- ▼ Layouts
- Family
- IL-8
- Unpaired t test**
- IL-8

|                        |                                     |                 |
|------------------------|-------------------------------------|-----------------|
| <b>Unpaired t test</b> |                                     |                 |
| 1                      | Table Analyzed                      | IL-8            |
| 2                      |                                     |                 |
| 3                      | Column D                            | P1+Feb          |
| 4                      | vs.                                 | vs.             |
| 5                      | Column C                            | P1              |
| 6                      |                                     |                 |
| 7                      | <b>Unpaired t test</b>              |                 |
| 8                      | P value                             | 0.0463          |
| 9                      | P value summary                     | *               |
| 10                     | Significantly different (P < 0.05)? | Yes             |
| 11                     | One- or two-tailed P value?         | Two-tailed      |
| 12                     | t, df                               | t=2.853, df=4   |
| 13                     |                                     |                 |
| 14                     | <b>How big is the difference?</b>   |                 |
| 15                     | Mean of column C                    | 39730           |
| 16                     | Mean of column D                    | 15202           |
| 17                     | Difference between means (D - C)    | -24527 ± 8597   |
| 18                     | 95% confidence interval             | -48397 to -6507 |
| 19                     | R squared (eta squared)             | 0.6705          |
| 20                     |                                     |                 |
| 21                     | <b>F test to compare variances</b>  |                 |
| 22                     | F, DFn, Dfd                         | 7.155, 2, 2     |
| 23                     | P value                             | 0.2452          |
| 24                     | P value summary                     | ns              |
| 25                     | Significantly different (P < 0.05)? | No              |
| 26                     |                                     |                 |
| 27                     | <b>Data analyzed</b>                |                 |
| 28                     | Sample size, column C               | 3               |
| 29                     | Sample size, column D               | 3               |
| 30                     |                                     |                 |
| 31                     |                                     |                 |
| 32                     |                                     |                 |
| 33                     |                                     |                 |

File Sheet Undo Clipboard Analysis Interpret Change Draw Write Text Export Print Send LA Help

Clipboard icons: Analyze, Paste, Copy, Undo, Redo, New

Text formatting: Bold, Italic, Underline, Text color, Background color, Font size (13), Arial

Export: Print, Send, LA, Help

Search

Results

- Unpaired t test of TNF
- Unpaired t test of IL-6
- Unpaired t test of IL-10
- Unpaired t test of IL-8
- Unpaired t test of IL-8
- Unpaired t test of IL-8**
- Unpaired t test of IL-8
- Unpaired t test of IL-8
- New Analysis...

Graphs

- TNF
- IL-6
- IL-10
- IL-8
- New Graph...

Layouts

Family

- IL-8
- Unpaired t test**

|                        |                                     |                |
|------------------------|-------------------------------------|----------------|
| <b>Unpaired t test</b> |                                     |                |
| 1                      | Table Analyzed                      | IL-8           |
| 2                      |                                     |                |
| 3                      | Column F                            | P2+Feb         |
| 4                      | vs.                                 | vs.            |
| 5                      | Column E                            | P2             |
| 6                      |                                     |                |
| 7                      | <b>Unpaired t test</b>              |                |
| 8                      | P value                             | 0.4195         |
| 9                      | P value summary                     | ns             |
| 10                     | Significantly different (P < 0.05)? | No             |
| 11                     | One- or two-tailed P value?         | Two-tailed     |
| 12                     | t, df                               | t=0.8990, df=4 |
| 13                     |                                     |                |
| 14                     | <b>How big is the difference?</b>   |                |
| 15                     | Mean of column E                    | 7135           |
| 16                     | Mean of column F                    | 5786           |
| 17                     | Difference between means (F - E)    | -1349 ± 1501   |
| 18                     | 95% confidence interval             | -5516 to 2817  |
| 19                     | R squared (eta squared)             | 0.1681         |
| 20                     |                                     |                |
| 21                     | <b>F test to compare variances</b>  |                |
| 22                     | F, DFn, Dfd                         | 1.064, 2, 2    |
| 23                     | P value                             | 0.9691         |
| 24                     | P value summary                     | ns             |
| 25                     | Significantly different (P < 0.05)? | No             |
| 26                     |                                     |                |
| 27                     | <b>Data analyzed</b>                |                |
| 28                     | Sample size, column E               | 3              |
| 29                     | Sample size, column F               | 3              |
| 30                     |                                     |                |
| 31                     |                                     |                |
| 32                     |                                     |                |
| 33                     |                                     |                |

File Sheet Undo Clipboard Analysis Interpret Change Draw Write Text Export Print Send LA Help

Analyze +29

13 Arial

T T A A B I U X<sup>2</sup> X<sub>2</sub>

txt sum

Search

- Results Unpaired t test of TNF
  - Unpaired t test of IL-6
  - Unpaired t test of IL-10
  - Unpaired t test of IL-8
  - Unpaired t test of IL-8
- Unpaired t test of IL-8
- Unpaired t test of IL-8
- New Analysis...
- Graphs
  - TNF
  - IL-6
  - IL-10
  - IL-8
  - New Graph...
- Layouts

|    |                                     |                |
|----|-------------------------------------|----------------|
|    | Unpaired t test                     |                |
| 1  | Table Analyzed                      | IL-8           |
| 2  |                                     |                |
| 3  | Column H                            | P3+Feb         |
| 4  | vs.                                 | vs.            |
| 5  | Column G                            | P3             |
| 6  |                                     |                |
| 7  | <b>Unpaired t test</b>              |                |
| 8  | P value                             | 0.3575         |
| 9  | P value summary                     | ns             |
| 10 | Significantly different (P < 0.05)? | No             |
| 11 | One- or two-tailed P value?         | Two-tailed     |
| 12 | t, df                               | t=1.039, df=4  |
| 13 |                                     |                |
| 14 | <b>How big is the difference?</b>   |                |
| 15 | Mean of column G                    | 2590           |
| 16 | Mean of column H                    | 2140           |
| 17 | Difference between means (H - G)    | -450.3 ± 433.4 |
| 18 | 95% confidence interval             | -1653 to 752.5 |
| 19 | R squared (eta squared)             | 0.2125         |
| 20 |                                     |                |
| 21 | <b>F test to compare variances</b>  |                |
| 22 | F, DFn, Dfd                         | 1.125, 2, 2    |
| 23 | P value                             | 0.9412         |
| 24 | P value summary                     | ns             |
| 25 | Significantly different (P < 0.05)? | No             |
| 26 |                                     |                |
| 27 | <b>Data analyzed</b>                |                |
| 28 | Sample size, column G               | 3              |
| 29 | Sample size, column H               | 3              |
| 30 |                                     |                |
| 31 |                                     |                |
| 32 |                                     |                |
| 33 |                                     |                |

- Family
  - IL-8
  - Unpaired t test

Unpaired t test of IL-8 Row 1, Column A

File Sheet Undo Clipboard Analysis Interpret Change Draw Write Text Export Print Send LA Help

Clipboard icons: Analyze, Paste, Copy, Undo, Redo, New

Text formatting: Arial, Bold, Italic, Underline, Text color, Background color, Bullets, Numbered list, Indent, Decrease indent, Increase indent, Paragraph style

Export: Print, Send, LA, Help

Search

▼ Results

- Unpaired t test of TNF
- Unpaired t test of IL-6
- Unpaired t test of IL-10
- Unpaired t test of IL-8
- Unpaired t test of IL-8**
- New Analysis...

▼ Graphs

- TNF
- IL-6
- IL-10
- IL-8**
- New Graph...

▼ Layouts

Family

- IL-8
- Unpaired t test**
- IL-8

| Unpaired t test |                                     |               |
|-----------------|-------------------------------------|---------------|
| 1               | Table Analyzed                      | IL-8          |
| 2               |                                     |               |
| 3               | Column J                            | LPS+Feb       |
| 4               | vs.                                 | vs.           |
| 5               | Column I                            | LPS           |
| 6               |                                     |               |
| 7               | <b>Unpaired t test</b>              |               |
| 8               | P value                             | 0.0334        |
| 9               | P value summary                     | *             |
| 10              | Significantly different (P < 0.05)? | Yes           |
| 11              | One- or two-tailed P value?         | Two-tailed    |
| 12              | t, df                               | t=3.185, df=4 |
| 13              |                                     |               |
| 14              | <b>How big is the difference?</b>   |               |
| 15              | Mean of column I                    | 68718         |
| 16              | Mean of column J                    | 256675        |
| 17              | Difference between means (J - I) ±  | 187958 ± 590  |
| 18              | 95% confidence interval             | 24114 to 3518 |
| 19              | R squared (eta squared)             | 0.7172        |
| 20              |                                     |               |
| 21              | <b>F test to compare variances</b>  |               |
| 22              | F, DFn, Dfd                         | 88.80, 2, 2   |
| 23              | P value                             | 0.0223        |
| 24              | P value summary                     | *             |
| 25              | Significantly different (P < 0.05)? | Yes           |
| 26              |                                     |               |
| 27              | <b>Data analyzed</b>                |               |
| 28              | Sample size, column I               | 3             |
| 29              | Sample size, column J               | 3             |
| 30              |                                     |               |
| 31              |                                     |               |
| 32              |                                     |               |
| 33              |                                     |               |
