# Supplementary material for: Malaria inflammation by xanthine oxidase‐produced reactive oxygen species
Source: PubMed Central journal article supplement (PMC6685105; doi:10.15252/emmm.201809903), 2019-07-02
Supplement: EMMM-11-e9903-s006.pdf [file EMMM-11-e9903-s006.pdf]

SourceDataforFigure5A

File Sheet Undo Clipboard Analysis Change Import Draw Write Text Export Print Send LA Help

Prism 8

Search

Table format: Grouped

|    |          | Group A    | Group B    | Group C | Group D | Group E | Group F | Group G | Group H | Group I | Group J | Group K | Group L | Group M |
|----|----------|------------|------------|---------|---------|---------|---------|---------|---------|---------|---------|---------|---------|---------|
|    |          | Donor 1    | Donor 2    | Donor 3 | Donor 4 | Title   | Title   | Title   | Title   | Title   | Title   | Title   | Title   | Title   |
|    |          | Y          | Y          | Y       | Y       | Y       | Y       | Y       | Y       | Y       | Y       | Y       | Y       | Y       |
| 1  | RBCL     | 1.829546   | 3.805310   | 1.00    | 2.99    |         |         |         |         |         |         |         |         |         |
| 2  | iRBCL    | 6.301137   | 3.094395   | 10.43   | 10.30   |         |         |         |         |         |         |         |         |         |
| 3  | LPS      | 910.409100 | 888.811200 | 667.56  | 1372.37 |         |         |         |         |         |         |         |         |         |
| 4  | XO+RBCL  | 218.170500 | 352.976400 | 195.20  | 244.60  |         |         |         |         |         |         |         |         |         |
| 5  | XO+iRBCL | 163.073900 | 225.716800 | 204.71  | 251.20  |         |         |         |         |         |         |         |         |         |
| 6  | XO+LPS   | 843.835200 | 684.654900 | 948.83  | 655.88  |         |         |         |         |         |         |         |         |         |
| 7  | Title    |            |            |         |         |         |         |         |         |         |         |         |         |         |
| 8  | Title    |            |            |         |         |         |         |         |         |         |         |         |         |         |
| 9  | Title    |            |            |         |         |         |         |         |         |         |         |         |         |         |
| 10 | Title    |            |            |         |         |         |         |         |         |         |         |         |         |         |
| 11 | Title    |            |            |         |         |         |         |         |         |         |         |         |         |         |
| 12 | Title    |            |            |         |         |         |         |         |         |         |         |         |         |         |
| 13 | Title    |            |            |         |         |         |         |         |         |         |         |         |         |         |
| 14 | Title    |            |            |         |         |         |         |         |         |         |         |         |         |         |
| 15 | Title    |            |            |         |         |         |         |         |         |         |         |         |         |         |
| 16 | Title    |            |            |         |         |         |         |         |         |         |         |         |         |         |
| 17 | Title    |            |            |         |         |         |         |         |         |         |         |         |         |         |
| 18 | Title    |            |            |         |         |         |         |         |         |         |         |         |         |         |
| 19 | Title    |            |            |         |         |         |         |         |         |         |         |         |         |         |
| 20 | Title    |            |            |         |         |         |         |         |         |         |         |         |         |         |
| 21 | Title    |            |            |         |         |         |         |         |         |         |         |         |         |         |
| 22 | Title    |            |            |         |         |         |         |         |         |         |         |         |         |         |
| 23 | Title    |            |            |         |         |         |         |         |         |         |         |         |         |         |
| 24 | Title    |            |            |         |         |         |         |         |         |         |         |         |         |         |
| 25 | Title    |            |            |         |         |         |         |         |         |         |         |         |         |         |
| 26 | Title    |            |            |         |         |         |         |         |         |         |         |         |         |         |
| 27 | Title    |            |            |         |         |         |         |         |         |         |         |         |         |         |
| 28 | Title    |            |            |         |         |         |         |         |         |         |         |         |         |         |
| 29 | Title    |            |            |         |         |         |         |         |         |         |         |         |         |         |
| 30 | Title    |            |            |         |         |         |         |         |         |         |         |         |         |         |
| 31 | Title    |            |            |         |         |         |         |         |         |         |         |         |         |         |
| 32 | Title    |            |            |         |         |         |         |         |         |         |         |         |         |         |
| 33 | Title    |            |            |         |         |         |         |         |         |         |         |         |         |         |
| 34 | Title    |            |            |         |         |         |         |         |         |         |         |         |         |         |

▼ Data Tables

- TNF
- TNF line
- IL6
- IL6 line
- IL-10
- IL-10 line
- IL1beta
- IL1beta line
- New Data Table...

▼ Info

- Project info 1
- Project info 1
- New Info...

▼ Results

- Transpose of TNF
- RM one-way ANOVA of Transpose of TNF
- Transpose of IL6
- RM one-way ANOVA of Transpose of IL6
- Transpose of IL-10
- RM one-way ANOVA of Transpose of IL-10
- Transpose of IL1beta
- RM one-way ANOVA of Transpose of IL1beta

Family

- TNF
- Transpose
- RM one-way ANOVA
- TNF

Row 11, C: Donor 3

SourceDataforFigure5A

File Sheet Undo Clipboard Analysis Change Import Draw Write Text Export Print Send LA Help

Prism 8

Search

Table format: Grouped

|    |          | Group A    | Group B    | Group C | Group D | Group E | Group F | Group G | Group H | Group I | Group J | Group K | Group L | Group M |
|----|----------|------------|------------|---------|---------|---------|---------|---------|---------|---------|---------|---------|---------|---------|
|    |          | Donor 1    | Donor 2    | Donor 3 | Donor 4 | Title   | Title   | Title   | Title   | Title   | Title   | Title   | Title   | Title   |
|    |          | Y          | Y          | Y       | Y       | Y       | Y       | Y       | Y       | Y       | Y       | Y       | Y       | Y       |
| 1  | RBCL     | 1.829546   | 3.805310   | 1.00    | 2.99    |         |         |         |         |         |         |         |         |         |
| 2  | iRBCL    | 6.301137   | 3.094395   | 10.43   | 10.30   |         |         |         |         |         |         |         |         |         |
| 3  | LPS      | 910.409100 | 888.811200 | 667.56  | 1372.37 |         |         |         |         |         |         |         |         |         |
| 4  | XO+RBCL  | 218.170500 | 352.976400 | 195.20  | 244.60  |         |         |         |         |         |         |         |         |         |
| 5  | XO+iRBCL | 163.073900 | 225.716800 | 204.71  | 251.20  |         |         |         |         |         |         |         |         |         |
| 6  | XO+LPS   | 843.835200 | 684.654900 | 948.83  | 655.88  |         |         |         |         |         |         |         |         |         |
| 7  | Title    |            |            |         |         |         |         |         |         |         |         |         |         |         |
| 8  | Title    |            |            |         |         |         |         |         |         |         |         |         |         |         |
| 9  | Title    |            |            |         |         |         |         |         |         |         |         |         |         |         |
| 10 | Title    |            |            |         |         |         |         |         |         |         |         |         |         |         |
| 11 | Title    |            |            |         |         |         |         |         |         |         |         |         |         |         |
| 12 | Title    |            |            |         |         |         |         |         |         |         |         |         |         |         |
| 13 | Title    |            |            |         |         |         |         |         |         |         |         |         |         |         |
| 14 | Title    |            |            |         |         |         |         |         |         |         |         |         |         |         |
| 15 | Title    |            |            |         |         |         |         |         |         |         |         |         |         |         |
| 16 | Title    |            |            |         |         |         |         |         |         |         |         |         |         |         |
| 17 | Title    |            |            |         |         |         |         |         |         |         |         |         |         |         |
| 18 | Title    |            |            |         |         |         |         |         |         |         |         |         |         |         |
| 19 | Title    |            |            |         |         |         |         |         |         |         |         |         |         |         |
| 20 | Title    |            |            |         |         |         |         |         |         |         |         |         |         |         |
| 21 | Title    |            |            |         |         |         |         |         |         |         |         |         |         |         |
| 22 | Title    |            |            |         |         |         |         |         |         |         |         |         |         |         |
| 23 | Title    |            |            |         |         |         |         |         |         |         |         |         |         |         |
| 24 | Title    |            |            |         |         |         |         |         |         |         |         |         |         |         |
| 25 | Title    |            |            |         |         |         |         |         |         |         |         |         |         |         |
| 26 | Title    |            |            |         |         |         |         |         |         |         |         |         |         |         |
| 27 | Title    |            |            |         |         |         |         |         |         |         |         |         |         |         |
| 28 | Title    |            |            |         |         |         |         |         |         |         |         |         |         |         |
| 29 | Title    |            |            |         |         |         |         |         |         |         |         |         |         |         |
| 30 | Title    |            |            |         |         |         |         |         |         |         |         |         |         |         |
| 31 | Title    |            |            |         |         |         |         |         |         |         |         |         |         |         |
| 32 | Title    |            |            |         |         |         |         |         |         |         |         |         |         |         |
| 33 | Title    |            |            |         |         |         |         |         |         |         |         |         |         |         |
| 34 | Title    |            |            |         |         |         |         |         |         |         |         |         |         |         |

▼ Data Tables

- TNF
- TNF line
- IL6
- IL6 line
- IL-10
- IL-10 line
- IL1beta
- IL1beta line
- New Data Table...

▼ Info

- Project info 1
- Project info 1
- New Info...

▼ Results

- Transpose of TNF
- RM one-way ANOVA of Transpose of TNF
- Transpose of IL6
- RM one-way ANOVA of Transpose of IL6
- Transpose of IL-10
- RM one-way ANOVA of Transpose of IL-10
- Transpose of IL1beta
- RM one-way ANOVA of Transpose of IL1beta

Family

- TNF
- Transpose
- RM one-way ANOVA
- TNF

Row 11, C: Donor 3

SourceDataforFigure5A

File Sheet Undo Clipboard Analysis Change Import Draw Write Text Export Print Send LA Help

Prism 8

Search

Table format: Grouped

|    |          | Group A    | Group B    | Group C | Group D | Group E | Group F | Group G | Group H | Group I | Group J | Group K | Group L | Gr |
|----|----------|------------|------------|---------|---------|---------|---------|---------|---------|---------|---------|---------|---------|----|
|    |          | Donor 1    | Donor 2    | Donor 3 | Donor 4 | Title   | Title   | Title   | Title   | Title   | Title   | Title   | Title   |    |
|    |          | Y          | Y          | Y       | Y       | Y       | Y       | Y       | Y       | Y       | Y       | Y       | Y       |    |
| 1  | XO+RBCL  | 218.170500 | 352.976400 | 195.20  | 244.60  |         |         |         |         |         |         |         |         |    |
| 2  | XO+IRBCL | 163.073900 | 225.716800 | 204.71  | 251.20  |         |         |         |         |         |         |         |         |    |
| 3  | Title    |            |            |         |         |         |         |         |         |         |         |         |         |    |
| 4  | Title    |            |            |         |         |         |         |         |         |         |         |         |         |    |
| 5  | Title    |            |            |         |         |         |         |         |         |         |         |         |         |    |
| 6  | Title    |            |            |         |         |         |         |         |         |         |         |         |         |    |
| 7  | Title    |            |            |         |         |         |         |         |         |         |         |         |         |    |
| 8  | Title    |            |            |         |         |         |         |         |         |         |         |         |         |    |
| 9  | Title    |            |            |         |         |         |         |         |         |         |         |         |         |    |
| 10 | Title    |            |            |         |         |         |         |         |         |         |         |         |         |    |
| 11 | Title    |            |            |         |         |         |         |         |         |         |         |         |         |    |
| 12 | Title    |            |            |         |         |         |         |         |         |         |         |         |         |    |
| 13 | Title    |            |            |         |         |         |         |         |         |         |         |         |         |    |
| 14 | Title    |            |            |         |         |         |         |         |         |         |         |         |         |    |
| 15 | Title    |            |            |         |         |         |         |         |         |         |         |         |         |    |
| 16 | Title    |            |            |         |         |         |         |         |         |         |         |         |         |    |
| 17 | Title    |            |            |         |         |         |         |         |         |         |         |         |         |    |
| 18 | Title    |            |            |         |         |         |         |         |         |         |         |         |         |    |
| 19 | Title    |            |            |         |         |         |         |         |         |         |         |         |         |    |
| 20 | Title    |            |            |         |         |         |         |         |         |         |         |         |         |    |
| 21 | Title    |            |            |         |         |         |         |         |         |         |         |         |         |    |
| 22 | Title    |            |            |         |         |         |         |         |         |         |         |         |         |    |
| 23 | Title    |            |            |         |         |         |         |         |         |         |         |         |         |    |
| 24 | Title    |            |            |         |         |         |         |         |         |         |         |         |         |    |
| 25 | Title    |            |            |         |         |         |         |         |         |         |         |         |         |    |
| 26 | Title    |            |            |         |         |         |         |         |         |         |         |         |         |    |
| 27 | Title    |            |            |         |         |         |         |         |         |         |         |         |         |    |
| 28 | Title    |            |            |         |         |         |         |         |         |         |         |         |         |    |
| 29 | Title    |            |            |         |         |         |         |         |         |         |         |         |         |    |
| 30 | Title    |            |            |         |         |         |         |         |         |         |         |         |         |    |
| 31 | Title    |            |            |         |         |         |         |         |         |         |         |         |         |    |
| 32 | Title    |            |            |         |         |         |         |         |         |         |         |         |         |    |
| 33 | Title    |            |            |         |         |         |         |         |         |         |         |         |         |    |
| 34 | Title    |            |            |         |         |         |         |         |         |         |         |         |         |    |

▼ Data Tables

- TNF
- TNF line**
- IL6
- IL6 line
- IL-10
- IL-10 line
- IL1beta
- IL1beta line
- New Data Table...

▼ Info

- Project info 1
- Project info 1
- New Info...

▼ Results

- Transpose of TNF
- RM one-way ANOVA of Transpose of TNF
- Transpose of IL6
- RM one-way ANOVA of Transpose of IL6
- Transpose of IL-10
- RM one-way ANOVA of Transpose of IL-10
- Transpose of IL1beta
- RM one-way ANOVA of Transpose of IL1beta

Family

- TNF line
- TNF line**

TNF line

Row 3, Column RT

SourceDataforFigure5A

File Sheet Undo Clipboard Analysis Change Import Draw Write Text Export Print Send LA Help

Prism 8

Search

▼ Data Tables

- TNF
- TNF line
- IL6**
- IL6 line
- IL-10
- IL-10 line
- IL1beta
- IL1beta line
- New Data Table...

▼ Info

- Project info 1
- Project info 1
- New Info...

▼ Results

- Transpose of TNF
- RM one-way ANOVA of Transpose of TNF
- Transpose of IL6**
- RM one-way ANOVA of Transpose of IL6
- Transpose of IL-10
- RM one-way ANOVA of Transpose of IL-10
- Transpose of IL1beta
- RM one-way ANOVA of Transpose of IL1beta

Family

- IL6
  - Transpose
  - RM one-way ANOVA
- IL6

| Table format: |          | Group A     | Group B      | Group C | Group D | Group E | Group F | Group G | Group H | Group I | Group J | Group K | Group L |
|---------------|----------|-------------|--------------|---------|---------|---------|---------|---------|---------|---------|---------|---------|---------|
| Grouped       |          | Donor 1     | Donor 2      | Donor 3 | Donor 4 | Title   | Title   | Title   | Title   | Title   | Title   | Title   | Title   |
|               | Y        | Y           | Y            | Y       | Y       | Y       | Y       | Y       | Y       | Y       | Y       | Y       | Y       |
| 1             | RBCL     | 2.360000    | 19.450000    | 1.00    | 1.00    |         |         |         |         |         |         |         |         |
| 2             | iRBCL    | 2.960000    | 12.280000    | 6.64    | 9.38    |         |         |         |         |         |         |         |         |
| 3             | LPS      | 5126.320000 | 10896.210000 | 3265.93 | 5290.13 |         |         |         |         |         |         |         |         |
| 4             | XO+RBCL  | 1246.220000 | 3944.220000  | 1005.61 | 867.81  |         |         |         |         |         |         |         |         |
| 5             | XO+iRBCL | 326.040000  | 1834.670000  | 259.96  | 608.87  |         |         |         |         |         |         |         |         |
| 6             | XO+LPS   | 4822.320000 | 8631.170000  | 4510.88 | 3180.83 |         |         |         |         |         |         |         |         |
| 7             | Title    |             |              |         |         |         |         |         |         |         |         |         |         |
| 8             | Title    |             |              |         |         |         |         |         |         |         |         |         |         |
| 9             | Title    |             |              |         |         |         |         |         |         |         |         |         |         |
| 10            | Title    |             |              |         |         |         |         |         |         |         |         |         |         |
| 11            | Title    |             |              |         |         |         |         |         |         |         |         |         |         |
| 12            | Title    |             |              |         |         |         |         |         |         |         |         |         |         |
| 13            | Title    |             |              |         |         |         |         |         |         |         |         |         |         |
| 14            | Title    |             |              |         |         |         |         |         |         |         |         |         |         |
| 15            | Title    |             |              |         |         |         |         |         |         |         |         |         |         |
| 16            | Title    |             |              |         |         |         |         |         |         |         |         |         |         |
| 17            | Title    |             |              |         |         |         |         |         |         |         |         |         |         |
| 18            | Title    |             |              |         |         |         |         |         |         |         |         |         |         |
| 19            | Title    |             |              |         |         |         |         |         |         |         |         |         |         |
| 20            | Title    |             |              |         |         |         |         |         |         |         |         |         |         |
| 21            | Title    |             |              |         |         |         |         |         |         |         |         |         |         |
| 22            | Title    |             |              |         |         |         |         |         |         |         |         |         |         |
| 23            | Title    |             |              |         |         |         |         |         |         |         |         |         |         |
| 24            | Title    |             |              |         |         |         |         |         |         |         |         |         |         |
| 25            | Title    |             |              |         |         |         |         |         |         |         |         |         |         |
| 26            | Title    |             |              |         |         |         |         |         |         |         |         |         |         |
| 27            | Title    |             |              |         |         |         |         |         |         |         |         |         |         |
| 28            | Title    |             |              |         |         |         |         |         |         |         |         |         |         |
| 29            | Title    |             |              |         |         |         |         |         |         |         |         |         |         |
| 30            | Title    |             |              |         |         |         |         |         |         |         |         |         |         |
| 31            | Title    |             |              |         |         |         |         |         |         |         |         |         |         |
| 32            | Title    |             |              |         |         |         |         |         |         |         |         |         |         |
| 33            | Title    |             |              |         |         |         |         |         |         |         |         |         |         |
| 34            | Title    |             |              |         |         |         |         |         |         |         |         |         |         |

IL6

Row 8, A: Donor 1

SourceDataforFigure5A

File Sheet Undo Clipboard Analysis Change Import Draw Write Text Export Print Send LA Help

Prism 8

Search

▼ Data Tables

- TNF
- TNF line
- IL6
- IL6 line**
- IL-10
- IL-10 line
- IL1beta
- IL1beta line
- + New Data Table...

▼ Info

- Project info 1
- Project info 1
- + New Info...

▼ Results

- Transpose of TNF
- RM one-way ANOVA of Transpose of TNF
- Transpose of IL6
- RM one-way ANOVA of Transpose of IL6
- Transpose of IL-10
- RM one-way ANOVA of Transpose of IL-10
- Transpose of IL1beta
- RM one-way ANOVA of Transpose of IL1beta

Family

- IL6 line
- IL6 line**

| Table format: |          | Group A     | Group B     | Group C | Group D | Group E | Group F | Group G | Group H | Group I | Group J | Group K | Group L | Group M |
|---------------|----------|-------------|-------------|---------|---------|---------|---------|---------|---------|---------|---------|---------|---------|---------|
| Grouped       |          | Donor 1     | Donor 2     | Donor 3 | Donor 4 | Title   | Title   | Title   | Title   | Title   | Title   | Title   | Title   | Title   |
|               |          | Y           | Y           | Y       | Y       | Y       | Y       | Y       | Y       | Y       | Y       | Y       | Y       | Y       |
| 1             | XO+RBCL  | 1246.220000 | 3944.220000 | 1005.61 | 867.81  |         |         |         |         |         |         |         |         |         |
| 2             | XO+IRBCL | 326.040000  | 1834.670000 | 259.96  | 608.87  |         |         |         |         |         |         |         |         |         |
| 3             | Title    |             |             |         |         |         |         |         |         |         |         |         |         |         |
| 4             | Title    |             |             |         |         |         |         |         |         |         |         |         |         |         |
| 5             | Title    |             |             |         |         |         |         |         |         |         |         |         |         |         |
| 6             | Title    |             |             |         |         |         |         |         |         |         |         |         |         |         |
| 7             | Title    |             |             |         |         |         |         |         |         |         |         |         |         |         |
| 8             | Title    |             |             |         |         |         |         |         |         |         |         |         |         |         |
| 9             | Title    |             |             |         |         |         |         |         |         |         |         |         |         |         |
| 10            | Title    |             |             |         |         |         |         |         |         |         |         |         |         |         |
| 11            | Title    |             |             |         |         |         |         |         |         |         |         |         |         |         |
| 12            | Title    |             |             |         |         |         |         |         |         |         |         |         |         |         |
| 13            | Title    |             |             |         |         |         |         |         |         |         |         |         |         |         |
| 14            | Title    |             |             |         |         |         |         |         |         |         |         |         |         |         |
| 15            | Title    |             |             |         |         |         |         |         |         |         |         |         |         |         |
| 16            | Title    |             |             |         |         |         |         |         |         |         |         |         |         |         |
| 17            | Title    |             |             |         |         |         |         |         |         |         |         |         |         |         |
| 18            | Title    |             |             |         |         |         |         |         |         |         |         |         |         |         |
| 19            | Title    |             |             |         |         |         |         |         |         |         |         |         |         |         |
| 20            | Title    |             |             |         |         |         |         |         |         |         |         |         |         |         |
| 21            | Title    |             |             |         |         |         |         |         |         |         |         |         |         |         |
| 22            | Title    |             |             |         |         |         |         |         |         |         |         |         |         |         |
| 23            | Title    |             |             |         |         |         |         |         |         |         |         |         |         |         |
| 24            | Title    |             |             |         |         |         |         |         |         |         |         |         |         |         |
| 25            | Title    |             |             |         |         |         |         |         |         |         |         |         |         |         |
| 26            | Title    |             |             |         |         |         |         |         |         |         |         |         |         |         |
| 27            | Title    |             |             |         |         |         |         |         |         |         |         |         |         |         |
| 28            | Title    |             |             |         |         |         |         |         |         |         |         |         |         |         |
| 29            | Title    |             |             |         |         |         |         |         |         |         |         |         |         |         |
| 30            | Title    |             |             |         |         |         |         |         |         |         |         |         |         |         |
| 31            | Title    |             |             |         |         |         |         |         |         |         |         |         |         |         |
| 32            | Title    |             |             |         |         |         |         |         |         |         |         |         |         |         |
| 33            | Title    |             |             |         |         |         |         |         |         |         |         |         |         |         |
| 34            | Title    |             |             |         |         |         |         |         |         |         |         |         |         |         |

IL6 line

Row 4, A: Donor 1

SourceDataforFigure5A

File Sheet Undo Clipboard Analysis Change Import Draw Write Text Export Print Send LA Help

Prism8

Search

Table format: Grouped

|    |          | Group A   | Group B   | Group C | Group D | Group E | Group F | Group G | Group H | Group I | Group J | Group K | Group L | Gr |
|----|----------|-----------|-----------|---------|---------|---------|---------|---------|---------|---------|---------|---------|---------|----|
|    |          | Donor 1   | Donor 2   | Donor 3 | Donor 4 | Title   | Title   | Title   | Title   | Title   | Title   | Title   | Title   |    |
|    |          | Y         | Y         | Y       | Y       | Y       | Y       | Y       | Y       | Y       | Y       | Y       | Y       |    |
| 1  | RBCL     | 1.000000  | 2.510000  | 1.00    | 1.00    |         |         |         |         |         |         |         |         |    |
| 2  | iRBCL    | 1.000000  | 2.410000  | 1.00    | 2.08    |         |         |         |         |         |         |         |         |    |
| 3  | LPS      | 33.740000 | 35.260000 | 4.92    | 13.71   |         |         |         |         |         |         |         |         |    |
| 4  | XO+RBCL  | 7.700000  | 41.390000 | 5.59    | 6.03    |         |         |         |         |         |         |         |         |    |
| 5  | XO+iRBCL | 21.350000 | 52.700000 | 10.34   | 18.25   |         |         |         |         |         |         |         |         |    |
| 6  | XO+LPS   | 31.250000 | 48.500000 | 7.17    | 16.27   |         |         |         |         |         |         |         |         |    |
| 7  | Title    |           |           |         |         |         |         |         |         |         |         |         |         |    |
| 8  | Title    |           |           |         |         |         |         |         |         |         |         |         |         |    |
| 9  | Title    |           |           |         |         |         |         |         |         |         |         |         |         |    |
| 10 | Title    |           |           |         |         |         |         |         |         |         |         |         |         |    |
| 11 | Title    |           |           |         |         |         |         |         |         |         |         |         |         |    |
| 12 | Title    |           |           |         |         |         |         |         |         |         |         |         |         |    |
| 13 | Title    |           |           |         |         |         |         |         |         |         |         |         |         |    |
| 14 | Title    |           |           |         |         |         |         |         |         |         |         |         |         |    |
| 15 | Title    |           |           |         |         |         |         |         |         |         |         |         |         |    |
| 16 | Title    |           |           |         |         |         |         |         |         |         |         |         |         |    |
| 17 | Title    |           |           |         |         |         |         |         |         |         |         |         |         |    |
| 18 | Title    |           |           |         |         |         |         |         |         |         |         |         |         |    |
| 19 | Title    |           |           |         |         |         |         |         |         |         |         |         |         |    |
| 20 | Title    |           |           |         |         |         |         |         |         |         |         |         |         |    |
| 21 | Title    |           |           |         |         |         |         |         |         |         |         |         |         |    |
| 22 | Title    |           |           |         |         |         |         |         |         |         |         |         |         |    |
| 23 | Title    |           |           |         |         |         |         |         |         |         |         |         |         |    |
| 24 | Title    |           |           |         |         |         |         |         |         |         |         |         |         |    |
| 25 | Title    |           |           |         |         |         |         |         |         |         |         |         |         |    |
| 26 | Title    |           |           |         |         |         |         |         |         |         |         |         |         |    |
| 27 | Title    |           |           |         |         |         |         |         |         |         |         |         |         |    |
| 28 | Title    |           |           |         |         |         |         |         |         |         |         |         |         |    |
| 29 | Title    |           |           |         |         |         |         |         |         |         |         |         |         |    |
| 30 | Title    |           |           |         |         |         |         |         |         |         |         |         |         |    |
| 31 | Title    |           |           |         |         |         |         |         |         |         |         |         |         |    |
| 32 | Title    |           |           |         |         |         |         |         |         |         |         |         |         |    |
| 33 | Title    |           |           |         |         |         |         |         |         |         |         |         |         |    |
| 34 | Title    |           |           |         |         |         |         |         |         |         |         |         |         |    |

▼ Data Tables

- TNF
- TNF line
- IL6
- IL6 line
- IL-10**
- IL-10 line
- IL1beta
- IL1beta line
- New Data Table...

▼ Info

- Project info 1
- Project info 1
- New Info...

▼ Results

- Transpose of TNF
- RM one-way ANOVA of Transpose of TNF
- Transpose of IL6
- RM one-way ANOVA of Transpose of IL6
- Transpose of IL-10**
- RM one-way ANOVA of Transpose of IL-10**
- Transpose of IL1beta
- RM one-way ANOVA of Transpose of IL1beta

Family

- IL-10
  - Transpose
  - RM one-way ANOVA
- IL-10

IL-10

Row 8, A: Donor 1

SourceDataforFigure5A

File Sheet Undo Clipboard Analysis Change Import Draw Write Text Export Print Send LA Help

Prism 8

Search

▼ Data Tables

- TNF
- TNF line
- IL6
- IL6 line
- IL-10
- IL-10 line**
- IL1beta
- IL1beta line
- + New Data Table...

▼ Info

- Project info 1
- Project info 1
- + New Info...

▼ Results

- Transpose of TNF
- RM one-way ANOVA of Transpose of TNF
- Transpose of IL6
- RM one-way ANOVA of Transpose of IL6
- Transpose of IL-10
- RM one-way ANOVA of Transpose of IL-10
- Transpose of IL1beta
- RM one-way ANOVA of Transpose of IL1beta

Family

- IL-10 line
- IL-10 line**

| Table format: |          | Group A   | Group B   | Group C | Group D | Group E | Group F | Group G | Group H | Group I | Group J | Group K | Group L | Group M |
|---------------|----------|-----------|-----------|---------|---------|---------|---------|---------|---------|---------|---------|---------|---------|---------|
| Grouped       |          | Donor 1   | Donor 2   | Donor 3 | Donor 4 | Title   | Title   | Title   | Title   | Title   | Title   | Title   | Title   | Title   |
|               |          | Y         | Y         | Y       | Y       | Y       | Y       | Y       | Y       | Y       | Y       | Y       | Y       | Y       |
| 1             | XO+RBCL  | 7.700000  | 41.390000 | 5.59    | 6.03    |         |         |         |         |         |         |         |         |         |
| 2             | XO+IRBCL | 21.350000 | 52.700000 | 10.34   | 18.25   |         |         |         |         |         |         |         |         |         |
| 3             | Title    |           |           |         |         |         |         |         |         |         |         |         |         |         |
| 4             | Title    |           |           |         |         |         |         |         |         |         |         |         |         |         |
| 5             | Title    |           |           |         |         |         |         |         |         |         |         |         |         |         |
| 6             | Title    |           |           |         |         |         |         |         |         |         |         |         |         |         |
| 7             | Title    |           |           |         |         |         |         |         |         |         |         |         |         |         |
| 8             | Title    |           |           |         |         |         |         |         |         |         |         |         |         |         |
| 9             | Title    |           |           |         |         |         |         |         |         |         |         |         |         |         |
| 10            | Title    |           |           |         |         |         |         |         |         |         |         |         |         |         |
| 11            | Title    |           |           |         |         |         |         |         |         |         |         |         |         |         |
| 12            | Title    |           |           |         |         |         |         |         |         |         |         |         |         |         |
| 13            | Title    |           |           |         |         |         |         |         |         |         |         |         |         |         |
| 14            | Title    |           |           |         |         |         |         |         |         |         |         |         |         |         |
| 15            | Title    |           |           |         |         |         |         |         |         |         |         |         |         |         |
| 16            | Title    |           |           |         |         |         |         |         |         |         |         |         |         |         |
| 17            | Title    |           |           |         |         |         |         |         |         |         |         |         |         |         |
| 18            | Title    |           |           |         |         |         |         |         |         |         |         |         |         |         |
| 19            | Title    |           |           |         |         |         |         |         |         |         |         |         |         |         |
| 20            | Title    |           |           |         |         |         |         |         |         |         |         |         |         |         |
| 21            | Title    |           |           |         |         |         |         |         |         |         |         |         |         |         |
| 22            | Title    |           |           |         |         |         |         |         |         |         |         |         |         |         |
| 23            | Title    |           |           |         |         |         |         |         |         |         |         |         |         |         |
| 24            | Title    |           |           |         |         |         |         |         |         |         |         |         |         |         |
| 25            | Title    |           |           |         |         |         |         |         |         |         |         |         |         |         |
| 26            | Title    |           |           |         |         |         |         |         |         |         |         |         |         |         |
| 27            | Title    |           |           |         |         |         |         |         |         |         |         |         |         |         |
| 28            | Title    |           |           |         |         |         |         |         |         |         |         |         |         |         |
| 29            | Title    |           |           |         |         |         |         |         |         |         |         |         |         |         |
| 30            | Title    |           |           |         |         |         |         |         |         |         |         |         |         |         |
| 31            | Title    |           |           |         |         |         |         |         |         |         |         |         |         |         |
| 32            | Title    |           |           |         |         |         |         |         |         |         |         |         |         |         |
| 33            | Title    |           |           |         |         |         |         |         |         |         |         |         |         |         |
| 34            | Title    |           |           |         |         |         |         |         |         |         |         |         |         |         |

IL-10 line

Row 3, A: Donor 1

SourceDataforFigure5A

File Sheet Undo Clipboard Analysis Change Import Draw Write Text Export Print Send LA Help

12 Helvetica

Prism8

Search

Table format: Grouped

|    |          | Group A   | Group B   | Group C | Group D | Group E | Group F | Group G | Group H | Group I | Group J | Group K | Group L | Group M |
|----|----------|-----------|-----------|---------|---------|---------|---------|---------|---------|---------|---------|---------|---------|---------|
|    |          | Donor 1   | Donor 2   | Donor 3 | Donor 4 | Title   | Title   | Title   | Title   | Title   | Title   | Title   | Title   | Title   |
|    |          | Y         | Y         | Y       | Y       | Y       | Y       | Y       | Y       | Y       | Y       | Y       | Y       | Y       |
| 1  | RBCL     | 1.000000  | 1.000000  | 1.00    | 1.00    |         |         |         |         |         |         |         |         |         |
| 2  | iRBCL    | 1.000000  | 1.000000  | 1.00    | 1.00    |         |         |         |         |         |         |         |         |         |
| 3  | LPS      | 29.880000 | 20.480000 | 19.94   | 6.03    |         |         |         |         |         |         |         |         |         |
| 4  | XO+RBCL  | 6.510000  | 24.010000 | 4.05    | 1.00    |         |         |         |         |         |         |         |         |         |
| 5  | XO+iRBCL | 27.280000 | 43.070000 | 24.98   | 15.35   |         |         |         |         |         |         |         |         |         |
| 6  | XO+LPS   | 1.000000  | 34.690000 | 14.65   | 9.69    |         |         |         |         |         |         |         |         |         |
| 7  | Title    |           |           |         |         |         |         |         |         |         |         |         |         |         |
| 8  | Title    |           |           |         |         |         |         |         |         |         |         |         |         |         |
| 9  | Title    |           |           |         |         |         |         |         |         |         |         |         |         |         |
| 10 | Title    |           |           |         |         |         |         |         |         |         |         |         |         |         |
| 11 | Title    |           |           |         |         |         |         |         |         |         |         |         |         |         |
| 12 | Title    |           |           |         |         |         |         |         |         |         |         |         |         |         |
| 13 | Title    |           |           |         |         |         |         |         |         |         |         |         |         |         |
| 14 | Title    |           |           |         |         |         |         |         |         |         |         |         |         |         |
| 15 | Title    |           |           |         |         |         |         |         |         |         |         |         |         |         |
| 16 | Title    |           |           |         |         |         |         |         |         |         |         |         |         |         |
| 17 | Title    |           |           |         |         |         |         |         |         |         |         |         |         |         |
| 18 | Title    |           |           |         |         |         |         |         |         |         |         |         |         |         |
| 19 | Title    |           |           |         |         |         |         |         |         |         |         |         |         |         |
| 20 | Title    |           |           |         |         |         |         |         |         |         |         |         |         |         |
| 21 | Title    |           |           |         |         |         |         |         |         |         |         |         |         |         |
| 22 | Title    |           |           |         |         |         |         |         |         |         |         |         |         |         |
| 23 | Title    |           |           |         |         |         |         |         |         |         |         |         |         |         |
| 24 | Title    |           |           |         |         |         |         |         |         |         |         |         |         |         |
| 25 | Title    |           |           |         |         |         |         |         |         |         |         |         |         |         |
| 26 | Title    |           |           |         |         |         |         |         |         |         |         |         |         |         |
| 27 | Title    |           |           |         |         |         |         |         |         |         |         |         |         |         |
| 28 | Title    |           |           |         |         |         |         |         |         |         |         |         |         |         |
| 29 | Title    |           |           |         |         |         |         |         |         |         |         |         |         |         |
| 30 | Title    |           |           |         |         |         |         |         |         |         |         |         |         |         |
| 31 | Title    |           |           |         |         |         |         |         |         |         |         |         |         |         |
| 32 | Title    |           |           |         |         |         |         |         |         |         |         |         |         |         |
| 33 | Title    |           |           |         |         |         |         |         |         |         |         |         |         |         |
| 34 | Title    |           |           |         |         |         |         |         |         |         |         |         |         |         |

▼ Data Tables

- TNF
- TNF line
- IL6
- IL6 line
- IL-10
- IL-10 line
- IL1beta**
- IL1beta line
- New Data Table...

▼ Info

- Project info 1
- Project info 1
- New Info...

▼ Results

- Transpose of TNF
- RM one-way ANOVA of Transpose of TNF
- Transpose of IL6
- RM one-way ANOVA of Transpose of IL6
- Transpose of IL-10
- RM one-way ANOVA of Transpose of IL-10
- Transpose of IL1beta**
- RM one-way ANOVA of Transpose of IL1beta**

Family

- IL1beta**
  - Transpose
  - RM one-way ANOVA
- IL1beta

IL1beta

Row 7, A: Donor 1



SourceDataforFigure5A

File Sheet Undo Clipboard Analysis Change Import Draw Write Text Export Print Send LA Help

Prism8

Search

Table format: Grouped

|    |          | Group A   | Group B   | Group C | Group D | Group E | Group F | Group G | Group H | Group I | Group J | Group K | Group L | Group M |
|----|----------|-----------|-----------|---------|---------|---------|---------|---------|---------|---------|---------|---------|---------|---------|
|    |          | Donor 1   | Donor 2   | Donor 3 | Donor 4 | Title   | Title   | Title   | Title   | Title   | Title   | Title   | Title   | Title   |
|    |          | Y         | Y         | Y       | Y       | Y       | Y       | Y       | Y       | Y       | Y       | Y       | Y       | Y       |
| 1  | XO+RBCL  | 6.510000  | 24.010000 | 4.05    | 1.00    |         |         |         |         |         |         |         |         |         |
| 2  | XO+IRBCL | 27.280000 | 43.070000 | 24.98   | 15.35   |         |         |         |         |         |         |         |         |         |
| 3  | Title    |           |           |         |         |         |         |         |         |         |         |         |         |         |
| 4  | Title    |           |           |         |         |         |         |         |         |         |         |         |         |         |
| 5  | Title    |           |           |         |         |         |         |         |         |         |         |         |         |         |
| 6  | Title    |           |           |         |         |         |         |         |         |         |         |         |         |         |
| 7  | Title    |           |           |         |         |         |         |         |         |         |         |         |         |         |
| 8  | Title    |           |           |         |         |         |         |         |         |         |         |         |         |         |
| 9  | Title    |           |           |         |         |         |         |         |         |         |         |         |         |         |
| 10 | Title    |           |           |         |         |         |         |         |         |         |         |         |         |         |
| 11 | Title    |           |           |         |         |         |         |         |         |         |         |         |         |         |
| 12 | Title    |           |           |         |         |         |         |         |         |         |         |         |         |         |
| 13 | Title    |           |           |         |         |         |         |         |         |         |         |         |         |         |
| 14 | Title    |           |           |         |         |         |         |         |         |         |         |         |         |         |
| 15 | Title    |           |           |         |         |         |         |         |         |         |         |         |         |         |
| 16 | Title    |           |           |         |         |         |         |         |         |         |         |         |         |         |
| 17 | Title    |           |           |         |         |         |         |         |         |         |         |         |         |         |
| 18 | Title    |           |           |         |         |         |         |         |         |         |         |         |         |         |
| 19 | Title    |           |           |         |         |         |         |         |         |         |         |         |         |         |
| 20 | Title    |           |           |         |         |         |         |         |         |         |         |         |         |         |
| 21 | Title    |           |           |         |         |         |         |         |         |         |         |         |         |         |
| 22 | Title    |           |           |         |         |         |         |         |         |         |         |         |         |         |
| 23 | Title    |           |           |         |         |         |         |         |         |         |         |         |         |         |
| 24 | Title    |           |           |         |         |         |         |         |         |         |         |         |         |         |
| 25 | Title    |           |           |         |         |         |         |         |         |         |         |         |         |         |
| 26 | Title    |           |           |         |         |         |         |         |         |         |         |         |         |         |
| 27 | Title    |           |           |         |         |         |         |         |         |         |         |         |         |         |
| 28 | Title    |           |           |         |         |         |         |         |         |         |         |         |         |         |
| 29 | Title    |           |           |         |         |         |         |         |         |         |         |         |         |         |
| 30 | Title    |           |           |         |         |         |         |         |         |         |         |         |         |         |
| 31 | Title    |           |           |         |         |         |         |         |         |         |         |         |         |         |
| 32 | Title    |           |           |         |         |         |         |         |         |         |         |         |         |         |
| 33 | Title    |           |           |         |         |         |         |         |         |         |         |         |         |         |
| 34 | Title    |           |           |         |         |         |         |         |         |         |         |         |         |         |

▼ Data Tables

- TNF
- TNF line
- IL6
- IL6 line
- IL-10
- IL-10 line
- IL1beta
- IL1beta line**
- New Data Table...

▼ Info

- Project info 1
- Project info 1
- New Info...

▼ Results

- Transpose of TNF
- RM one-way ANOVA of Transpose of TNF
- Transpose of IL6
- RM one-way ANOVA of Transpose of IL6
- Transpose of IL-10
- RM one-way ANOVA of Transpose of IL-10
- Transpose of IL1beta
- RM one-way ANOVA of Transpose of IL1beta

Family

- IL1beta line
- IL1beta line

IL1beta line

Row 3, A: Donor 1

SourceDataforFigure5A

File Sheet Undo Clipboard Analysis Interpret Change Draw Write Text Export Print Send LA Help

Prism 8

Search

▼ Data Tables

- TNF
- TNF line
- IL6
- IL6 line
- IL-10
- IL-10 line
- IL1beta
- IL1beta line
- + New Data Table...

▼ Info

- Project info 1
- Project info 1
- + New Info...

▼ Results

- Transpose of TNF**
- RM one-way ANOVA of Transpose of TNF
- Transpose of IL6
- RM one-way ANOVA of Transpose of IL6
- Transpose of IL-10
- RM one-way ANOVA of Transpose of IL-10
- Transpose of IL1beta
- RM one-way ANOVA of Transpose of IL1beta

Family

- TNF
- Transpose
- RM one-way ANOVA

|    |           | A     | B      | C        | D       | E        | F       | G     | H     | I     | J     | K     | L     | M     |
|----|-----------|-------|--------|----------|---------|----------|---------|-------|-------|-------|-------|-------|-------|-------|
|    | Transpose | RBCL  | iRBCL  | LPS      | XO+RBCL | XO+iRBCL | XO+LPS  | Title | Title | Title | Title | Title | Title | Title |
|    |           | Y     | Y      | Y        | Y       | Y        | Y       | Y     | Y     | Y     | Y     | Y     | Y     | Y     |
| 1  | Donor 1   | 1.830 | 6.301  | 910.409  | 218.171 | 163.074  | 843.835 |       |       |       |       |       |       |       |
| 2  | Donor 2   | 3.805 | 3.094  | 888.811  | 352.976 | 225.717  | 684.655 |       |       |       |       |       |       |       |
| 3  | Donor 3   | 1.000 | 10.430 | 667.560  | 195.200 | 204.710  | 948.830 |       |       |       |       |       |       |       |
| 4  | Donor 4   | 2.990 | 10.300 | 1372.370 | 244.600 | 251.200  | 655.880 |       |       |       |       |       |       |       |
| 5  |           |       |        |          |         |          |         |       |       |       |       |       |       |       |
| 6  |           |       |        |          |         |          |         |       |       |       |       |       |       |       |
| 7  |           |       |        |          |         |          |         |       |       |       |       |       |       |       |
| 8  |           |       |        |          |         |          |         |       |       |       |       |       |       |       |
| 9  |           |       |        |          |         |          |         |       |       |       |       |       |       |       |
| 10 |           |       |        |          |         |          |         |       |       |       |       |       |       |       |
| 11 |           |       |        |          |         |          |         |       |       |       |       |       |       |       |
| 12 |           |       |        |          |         |          |         |       |       |       |       |       |       |       |
| 13 |           |       |        |          |         |          |         |       |       |       |       |       |       |       |
| 14 |           |       |        |          |         |          |         |       |       |       |       |       |       |       |
| 15 |           |       |        |          |         |          |         |       |       |       |       |       |       |       |
| 16 |           |       |        |          |         |          |         |       |       |       |       |       |       |       |
| 17 |           |       |        |          |         |          |         |       |       |       |       |       |       |       |
| 18 |           |       |        |          |         |          |         |       |       |       |       |       |       |       |
| 19 |           |       |        |          |         |          |         |       |       |       |       |       |       |       |
| 20 |           |       |        |          |         |          |         |       |       |       |       |       |       |       |
| 21 |           |       |        |          |         |          |         |       |       |       |       |       |       |       |
| 22 |           |       |        |          |         |          |         |       |       |       |       |       |       |       |
| 23 |           |       |        |          |         |          |         |       |       |       |       |       |       |       |
| 24 |           |       |        |          |         |          |         |       |       |       |       |       |       |       |
| 25 |           |       |        |          |         |          |         |       |       |       |       |       |       |       |
| 26 |           |       |        |          |         |          |         |       |       |       |       |       |       |       |
| 27 |           |       |        |          |         |          |         |       |       |       |       |       |       |       |
| 28 |           |       |        |          |         |          |         |       |       |       |       |       |       |       |
| 29 |           |       |        |          |         |          |         |       |       |       |       |       |       |       |
| 30 |           |       |        |          |         |          |         |       |       |       |       |       |       |       |
| 31 |           |       |        |          |         |          |         |       |       |       |       |       |       |       |
| 32 |           |       |        |          |         |          |         |       |       |       |       |       |       |       |
| 33 |           |       |        |          |         |          |         |       |       |       |       |       |       |       |
| 34 |           |       |        |          |         |          |         |       |       |       |       |       |       |       |

Transpose of TNF Row 1, A: RBCL

SourceDataforFigure5A

File Sheet Undo Clipboard Analysis Interpret Change Draw Write Text Export Print Send LA Help

Prism 8

Search ANOVA results Multiple comparisons

▼ Data Tables

- TNF
- TNF line
- IL6
- IL6 line
- IL-10
- IL-10 line
- IL1beta
- IL1beta line
- New Data Table...

▼ Info

- Project info 1
- Project info 1
- New Info...

▼ Results

- Transpose of TNF
- RM one-way ANOVA of Transpose of TNF**
- Transpose of IL6
- RM one-way ANOVA of Transpose of IL6
- Transpose of IL-10
- RM one-way ANOVA of Transpose of IL-10
- Transpose of IL1beta
- RM one-way ANOVA of Transpose of IL1beta

Family

- TNF
- Transpose
- RM one-way ANOVA**

| RM one-way ANOVA ANOVA results |                                           |                  |           |           |                          |                |
|--------------------------------|-------------------------------------------|------------------|-----------|-----------|--------------------------|----------------|
| 1                              | Table Analyzed                            | Transpose of TNF |           |           |                          |                |
| 2                              |                                           |                  |           |           |                          |                |
| 3                              | <b>Repeated measures ANOVA summary</b>    |                  |           |           |                          |                |
| 4                              | Assume sphericity?                        | No               |           |           |                          |                |
| 5                              | F                                         | 31.45            |           |           |                          |                |
| 6                              | P value                                   | 0.0056           |           |           |                          |                |
| 7                              | P value summary                           | **               |           |           |                          |                |
| 8                              | Statistically significant (P < 0.05)?     | Yes              |           |           |                          |                |
| 9                              | Geisser-Greenhouse's epsilon              | 0.2484           |           |           |                          |                |
| 10                             | R square                                  | 0.9129           |           |           |                          |                |
| 11                             |                                           |                  |           |           |                          |                |
| 12                             | <b>Was the matching effective?</b>        |                  |           |           |                          |                |
| 13                             | F                                         | 0.3901           |           |           |                          |                |
| 14                             | P value                                   | 0.7619           |           |           |                          |                |
| 15                             | P value summary                           | ns               |           |           |                          |                |
| 16                             | Is there significant matching (P < 0.05)? | No               |           |           |                          |                |
| 17                             | R square                                  | 0.006747         |           |           |                          |                |
| 18                             |                                           |                  |           |           |                          |                |
| 19                             | <b>ANOVA table</b>                        | <b>SS</b>        | <b>DF</b> | <b>MS</b> | <b>F (DFn, DFd)</b>      | <b>P value</b> |
| 20                             | Treatment (between columns)               | 3296598          | 5         | 659320    | F (1.242, 3.726) = 31.45 | P=0.0056       |
| 21                             | Individual (between rows)                 | 24530            | 3         | 8177      | F (3, 15) = 0.3901       | P=0.7619       |
| 22                             | Residual (random)                         | 314428           | 15        | 20962     |                          |                |
| 23                             | Total                                     | 3635557          | 23        |           |                          |                |
| 24                             |                                           |                  |           |           |                          |                |
| 25                             | <b>Data summary</b>                       |                  |           |           |                          |                |
| 26                             | Number of treatments (columns)            | 6                |           |           |                          |                |
| 27                             | Number of subjects (rows)                 | 4                |           |           |                          |                |
| 28                             | Number of missing values                  | 0                |           |           |                          |                |
| 29                             |                                           |                  |           |           |                          |                |
| 30                             |                                           |                  |           |           |                          |                |
| 31                             |                                           |                  |           |           |                          |                |
| 32                             |                                           |                  |           |           |                          |                |

RM one-way ANOVA of Transpose of TNF Row 1, Column A

SourceDataforFigure5A

File Sheet Undo Clipboard Analysis Interpret Change Draw Write Text Export Print Send LA Help

Prism 8

Search ANOVA results Multiple comparisons

Data Tables

- TNF
- TNF line
- IL6
- IL6 line
- IL-10
- IL-10 line
- IL1beta
- IL1beta line
- New Data Table...

Info

- Project info 1
- Project info 1
- New Info...

Results

- Transpose of TNF
- RM one-way ANOVA of Transpose of TNF**
- Transpose of IL6
- RM one-way ANOVA of Transpose of IL6
- Transpose of IL-10
- RM one-way ANOVA of Transpose of IL-10
- Transpose of IL1beta
- RM one-way ANOVA of Transpose of IL1beta

Family

- TNF
- Transpose
- RM one-way ANOVA**

| RM one-way ANOVA |                                          | Multiple comparisons      |                     |                    |                         |           |          |           |
|------------------|------------------------------------------|---------------------------|---------------------|--------------------|-------------------------|-----------|----------|-----------|
| 1                | Number of families                       |                           |                     |                    |                         |           |          |           |
| 2                | Number of comparisons per family         |                           |                     |                    |                         |           |          |           |
| 3                | Alpha                                    |                           |                     |                    |                         |           |          |           |
| 4                |                                          |                           |                     |                    |                         |           |          |           |
| 5                | <b>Tukey's multiple comparisons test</b> | <b>95.00% CI of diff.</b> | <b>Significant?</b> | <b>Summary</b>     | <b>Adjusted P Value</b> |           |          |           |
| 6                | RBCL vs. iRBCL                           | -17.60 to 7.347           | No                  | ns                 | 0.3835                  | A-B       |          |           |
| 7                | RBCL vs. LPS                             | -1797 to -117.7           | Yes                 | *                  | 0.0349                  | A-C       |          |           |
| 8                | RBCL vs. XO+RBCL                         | -445.5 to -55.17          | Yes                 | *                  | 0.0252                  | A-D       |          |           |
| 9                | RBCL vs. XO+iRBCL                        | -312.7 to -104.8          | Yes                 | **                 | 0.0069                  | A-E       |          |           |
| 10               | RBCL vs. XO+LPS                          | -1176 to -385.8           | Yes                 | **                 | 0.0073                  | A-F       |          |           |
| 11               | iRBCL vs. LPS                            | -1792 to -112.9           | Yes                 | *                  | 0.0354                  | B-C       |          |           |
| 12               | iRBCL vs. XO+RBCL                        | -451.7 to -38.73          | Yes                 | *                  | 0.0312                  | B-D       |          |           |
| 13               | iRBCL vs. XO+iRBCL                       | -307.8 to -99.46          | Yes                 | **                 | 0.0075                  | B-E       |          |           |
| 14               | iRBCL vs. XO+LPS                         | -1164 to -387.2           | Yes                 | **                 | 0.0070                  | B-F       |          |           |
| 15               | LPS vs. XO+RBCL                          | -132.1 to 1546            | No                  | ns                 | 0.0786                  | C-D       |          |           |
| 16               | LPS vs. XO+iRBCL                         | -34.36 to 1532            | No                  | ns                 | 0.0564                  | C-E       |          |           |
| 17               | LPS vs. XO+LPS                           | -999.7 to 1353            | No                  | ns                 | 0.9367                  | C-F       |          |           |
| 18               | XO+RBCL vs. XO+iRBCL                     | -141.5 to 224.7           | No                  | ns                 | 0.7805                  | D-E       |          |           |
| 19               | XO+RBCL vs. XO+LPS                       | -1081 to 19.91            | No                  | ns                 | 0.0552                  | D-F       |          |           |
| 20               | XO+iRBCL vs. XO+LPS                      | -1043 to -101.7           | Yes                 | *                  | 0.0292                  | E-F       |          |           |
| 21               |                                          |                           |                     |                    |                         |           |          |           |
| 22               | <b>Test details</b>                      | <b>Mean 2</b>             | <b>Mean Diff.</b>   | <b>SE of diff.</b> | <b>n1</b>               | <b>n2</b> | <b>q</b> | <b>DF</b> |
| 23               | RBCL vs. iRBCL                           | 7.531                     | -5.125              | 2.195              | 4                       | 4         | 3.303    | 3         |
| 24               | RBCL vs. LPS                             | 959.8                     | -957.4              | 147.7              | 4                       | 4         | 9.164    | 3         |
| 25               | RBCL vs. XO+RBCL                         | 252.7                     | -250.3              | 34.34              | 4                       | 4         | 10.31    | 3         |
| 26               | RBCL vs. XO+iRBCL                        | 211.2                     | -208.8              | 18.29              | 4                       | 4         | 16.15    | 3         |
| 27               | RBCL vs. XO+LPS                          | 783.3                     | -780.9              | 69.52              | 4                       | 4         | 15.89    | 3         |
| 28               | iRBCL vs. LPS                            | 959.8                     | -952.3              | 147.7              | 4                       | 4         | 9.118    | 3         |
| 29               | iRBCL vs. XO+RBCL                        | 252.7                     | -245.2              | 36.33              | 4                       | 4         | 9.545    | 3         |
| 30               | iRBCL vs. XO+iRBCL                       | 211.2                     | -203.6              | 18.33              | 4                       | 4         | 15.71    | 3         |
| 31               | iRBCL vs. XO+LPS                         | 783.3                     | -775.8              | 68.37              | 4                       | 4         | 16.05    | 3         |
| 32               | LPS vs. XO+RBCL                          | 252.7                     | 707.1               | 147.7              | 4                       | 4         | 6.772    | 3         |
| 33               | LPS vs. XO+iRBCL                         | 211.2                     | 710.6               | 147.7              | 4                       | 4         | 7.004    | 3         |

RM one-way ANOVA of Transpose of TNF Row 1, Column A

SourceDataforFigure5A

File Sheet Undo Clipboard Analysis Interpret Change Draw Write Text Export Print Send LA Help

12 Helvetica

Prism8

Search

ANOVA results Multiple comparisons

Data Tables

- TNF
- TNF line
- IL6
- IL6 line
- IL-10
- IL-10 line
- IL1beta
- IL1beta line
- New Data Table...

Info

- Project info 1
- Project info 1
- New Info...

Results

- Transpose of TNF
- RM one-way ANOVA of Transpose of TNF**
- Transpose of IL6
- RM one-way ANOVA of Transpose of IL6
- Transpose of IL-10
- RM one-way ANOVA of Transpose of IL-10
- Transpose of IL1beta
- RM one-way ANOVA of Transpose of IL1beta

Family

- TNF
- Transpose
- RM one-way ANOVA**

|    |                      | Mean 2          | Mean Diff.        | SE of diff.        | n1        | n2        | q        | DF        |
|----|----------------------|-----------------|-------------------|--------------------|-----------|-----------|----------|-----------|
| 16 | LPS vs. XO+IRBCL     | -34.36 to 1532  | No                | ns                 | 0.0564    |           | C-E      |           |
| 17 | LPS vs. XO+LPS       | -999.7 to 1353  | No                | ns                 | 0.9367    |           | C-F      |           |
| 18 | XO+RBCL vs. XO+IRBCL | -141.5 to 224.7 | No                | ns                 | 0.7805    |           | D-E      |           |
| 19 | XO+RBCL vs. XO+LPS   | -1081 to 19.91  | No                | ns                 | 0.0552    |           | D-F      |           |
| 20 | XO+IRBCL vs. XO+LPS  | -1043 to -101.7 | Yes               | *                  | 0.0292    |           | E-F      |           |
| 21 |                      |                 |                   |                    |           |           |          |           |
| 22 | <b>Test details</b>  | <b>Mean 2</b>   | <b>Mean Diff.</b> | <b>SE of diff.</b> | <b>n1</b> | <b>n2</b> | <b>q</b> | <b>DF</b> |
| 23 | RBCL vs. iRBCL       | 7.531           | -5.125            | 2.195              | 4         | 4         | 3.303    | 3         |
| 24 | RBCL vs. LPS         | 959.8           | -957.4            | 147.7              | 4         | 4         | 9.164    | 3         |
| 25 | RBCL vs. XO+RBCL     | 252.7           | -250.3            | 34.34              | 4         | 4         | 10.31    | 3         |
| 26 | RBCL vs. XO+IRBCL    | 211.2           | -208.8            | 18.29              | 4         | 4         | 16.15    | 3         |
| 27 | RBCL vs. XO+LPS      | 783.3           | -780.9            | 69.52              | 4         | 4         | 15.89    | 3         |
| 28 | iRBCL vs. LPS        | 959.8           | -952.3            | 147.7              | 4         | 4         | 9.118    | 3         |
| 29 | iRBCL vs. XO+RBCL    | 252.7           | -245.2            | 36.33              | 4         | 4         | 9.545    | 3         |
| 30 | iRBCL vs. XO+IRBCL   | 211.2           | -203.6            | 18.33              | 4         | 4         | 15.71    | 3         |
| 31 | iRBCL vs. XO+LPS     | 783.3           | -775.8            | 68.37              | 4         | 4         | 16.05    | 3         |
| 32 | LPS vs. XO+RBCL      | 252.7           | 707.1             | 147.7              | 4         | 4         | 6.772    | 3         |
| 33 | LPS vs. XO+IRBCL     | 211.2           | 748.6             | 137.8              | 4         | 4         | 7.684    | 3         |
| 34 | LPS vs. XO+LPS       | 783.3           | 176.5             | 207.0              | 4         | 4         | 1.206    | 3         |
| 35 | XO+RBCL vs. XO+IRBCL | 211.2           | 41.56             | 32.22              | 4         | 4         | 1.824    | 3         |
| 36 | XO+RBCL vs. XO+LPS   | 783.3           | -530.6            | 96.86              | 4         | 4         | 7.746    | 3         |
| 37 | XO+IRBCL vs. XO+LPS  | 783.3           | -572.1            | 82.78              | 4         | 4         | 9.774    | 3         |
| 38 |                      |                 |                   |                    |           |           |          |           |
| 39 |                      |                 |                   |                    |           |           |          |           |
| 40 |                      |                 |                   |                    |           |           |          |           |
| 41 |                      |                 |                   |                    |           |           |          |           |
| 42 |                      |                 |                   |                    |           |           |          |           |
| 43 |                      |                 |                   |                    |           |           |          |           |
| 44 |                      |                 |                   |                    |           |           |          |           |
| 45 |                      |                 |                   |                    |           |           |          |           |
| 46 |                      |                 |                   |                    |           |           |          |           |
| 47 |                      |                 |                   |                    |           |           |          |           |

RM one-way ANOVA of Transpose of TNF Row 1, Column A

SourceDataforFigure5A

File Sheet Undo Clipboard Analysis Interpret Change Draw Write Text Export Print Send LA Help

Prism 8

Search

▼ Data Tables

- TNF
- TNF line
- IL6
- IL6 line
- IL-10
- IL-10 line
- IL1beta
- IL1beta line
- New Data Table...

▼ Info

- Project info 1
- Project info 1
- New Info...

▼ Results

- Transpose of TNF
- RM one-way ANOVA of Transpose of TNF
- Transpose of IL6**
- RM one-way ANOVA of Transpose of IL6
- Transpose of IL-10
- RM one-way ANOVA of Transpose of IL-10
- Transpose of IL1beta
- RM one-way ANOVA of Transpose of IL1beta

Family

- IL6
  - Transpose
  - RM one-way ANOVA

| Transpose |         | A      | B      | C         | D        | E        | F        | G     | H     | I     | J     | K     | L     |
|-----------|---------|--------|--------|-----------|----------|----------|----------|-------|-------|-------|-------|-------|-------|
|           |         | RBCL   | iRBCL  | LPS       | XO+RBCL  | XO+iRBCL | XO+LPS   | Title | Title | Title | Title | Title | Title |
|           |         | Y      | Y      | Y         | Y        | Y        | Y        | Y     | Y     | Y     | Y     | Y     | Y     |
| 1         | Donor 1 | 2.360  | 2.960  | 5126.320  | 1246.220 | 326.040  | 4822.320 |       |       |       |       |       |       |
| 2         | Donor 2 | 19.450 | 12.280 | 10896.210 | 3944.220 | 1834.670 | 8631.170 |       |       |       |       |       |       |
| 3         | Donor 3 | 1.000  | 6.640  | 3265.930  | 1005.610 | 259.960  | 4510.880 |       |       |       |       |       |       |
| 4         | Donor 4 | 1.000  | 9.380  | 5290.130  | 867.810  | 608.870  | 3180.830 |       |       |       |       |       |       |
| 5         |         |        |        |           |          |          |          |       |       |       |       |       |       |
| 6         |         |        |        |           |          |          |          |       |       |       |       |       |       |
| 7         |         |        |        |           |          |          |          |       |       |       |       |       |       |
| 8         |         |        |        |           |          |          |          |       |       |       |       |       |       |
| 9         |         |        |        |           |          |          |          |       |       |       |       |       |       |
| 10        |         |        |        |           |          |          |          |       |       |       |       |       |       |
| 11        |         |        |        |           |          |          |          |       |       |       |       |       |       |
| 12        |         |        |        |           |          |          |          |       |       |       |       |       |       |
| 13        |         |        |        |           |          |          |          |       |       |       |       |       |       |
| 14        |         |        |        |           |          |          |          |       |       |       |       |       |       |
| 15        |         |        |        |           |          |          |          |       |       |       |       |       |       |
| 16        |         |        |        |           |          |          |          |       |       |       |       |       |       |
| 17        |         |        |        |           |          |          |          |       |       |       |       |       |       |
| 18        |         |        |        |           |          |          |          |       |       |       |       |       |       |
| 19        |         |        |        |           |          |          |          |       |       |       |       |       |       |
| 20        |         |        |        |           |          |          |          |       |       |       |       |       |       |
| 21        |         |        |        |           |          |          |          |       |       |       |       |       |       |
| 22        |         |        |        |           |          |          |          |       |       |       |       |       |       |
| 23        |         |        |        |           |          |          |          |       |       |       |       |       |       |
| 24        |         |        |        |           |          |          |          |       |       |       |       |       |       |
| 25        |         |        |        |           |          |          |          |       |       |       |       |       |       |
| 26        |         |        |        |           |          |          |          |       |       |       |       |       |       |
| 27        |         |        |        |           |          |          |          |       |       |       |       |       |       |
| 28        |         |        |        |           |          |          |          |       |       |       |       |       |       |
| 29        |         |        |        |           |          |          |          |       |       |       |       |       |       |
| 30        |         |        |        |           |          |          |          |       |       |       |       |       |       |
| 31        |         |        |        |           |          |          |          |       |       |       |       |       |       |
| 32        |         |        |        |           |          |          |          |       |       |       |       |       |       |
| 33        |         |        |        |           |          |          |          |       |       |       |       |       |       |
| 34        |         |        |        |           |          |          |          |       |       |       |       |       |       |

Transpose of IL6

Row 1, A: RBCL

SourceDataforFigure5A

File Sheet Undo Clipboard Analysis Interpret Change Draw Write Text Export Print Send LA Help

12 Helvetica

Prism8

Search ANOVA results Multiple comparisons

▼ Data Tables

- TNF
- TNF line
- IL6
- IL6 line
- IL-10
- IL-10 line
- IL1beta
- IL1beta line
- New Data Table...

▼ Info

- Project info 1
- Project info 1
- New Info...

▼ Results

- Transpose of TNF
- RM one-way ANOVA of Transpose of TNF
- Transpose of IL6
- RM one-way ANOVA of Transpose of IL6**
- Transpose of IL-10
- RM one-way ANOVA of Transpose of IL-10
- Transpose of IL1beta
- RM one-way ANOVA of Transpose of IL1beta

Family

- IL6
- Transpose
- RM one-way ANOVA**

| RM one-way ANOVA ANOVA results |                                           |                  |           |           |                          |                |
|--------------------------------|-------------------------------------------|------------------|-----------|-----------|--------------------------|----------------|
| 1                              | Table Analyzed                            | Transpose of IL6 |           |           |                          |                |
| 2                              |                                           |                  |           |           |                          |                |
| 3                              | <b>Repeated measures ANOVA summary</b>    |                  |           |           |                          |                |
| 4                              | Assume sphericity?                        | No               |           |           |                          |                |
| 5                              | F                                         | 15.90            |           |           |                          |                |
| 6                              | P value                                   | 0.0184           |           |           |                          |                |
| 7                              | P value summary                           | *                |           |           |                          |                |
| 8                              | Statistically significant (P < 0.05)?     | Yes              |           |           |                          |                |
| 9                              | Geisser-Greenhouse's epsilon              | 0.2427           |           |           |                          |                |
| 10                             | R square                                  | 0.8413           |           |           |                          |                |
| 11                             |                                           |                  |           |           |                          |                |
| 12                             | <b>Was the matching effective?</b>        |                  |           |           |                          |                |
| 13                             | F                                         | 5.254            |           |           |                          |                |
| 14                             | P value                                   | 0.0112           |           |           |                          |                |
| 15                             | P value summary                           | *                |           |           |                          |                |
| 16                             | Is there significant matching (P < 0.05)? | Yes              |           |           |                          |                |
| 17                             | R square                                  | 0.1430           |           |           |                          |                |
| 18                             |                                           |                  |           |           |                          |                |
| 19                             | <b>ANOVA table</b>                        | <b>SS</b>        | <b>DF</b> | <b>MS</b> | <b>F (DFn, DFd)</b>      | <b>P value</b> |
| 20                             | Treatment (between columns)               | 147504859        | 5         | 29500972  | F (1.213, 3.640) = 15.90 | P=0.0184       |
| 21                             | Individual (between rows)                 | 29250943         | 3         | 9750314   | F (3, 15) = 5.254        | P=0.0112       |
| 22                             | Residual (random)                         | 27834455         | 15        | 1855630   |                          |                |
| 23                             | Total                                     | 204590257        | 23        |           |                          |                |
| 24                             |                                           |                  |           |           |                          |                |
| 25                             | <b>Data summary</b>                       |                  |           |           |                          |                |
| 26                             | Number of treatments (columns)            | 6                |           |           |                          |                |
| 27                             | Number of subjects (rows)                 | 4                |           |           |                          |                |
| 28                             | Number of missing values                  | 0                |           |           |                          |                |
| 29                             |                                           |                  |           |           |                          |                |
| 30                             |                                           |                  |           |           |                          |                |
| 31                             |                                           |                  |           |           |                          |                |
| 32                             |                                           |                  |           |           |                          |                |

RM one-way ANOVA of Transpose of IL6 Row 1, Column A

SourceDataforFigure5A

File Sheet Undo Clipboard Analysis Interpret Change Draw Write Text Export Print Send LA Help

Prism 8

Search ANOVA results Multiple comparisons

Data Tables

- TNF
- TNF line
- IL6
- IL6 line
- IL-10
- IL-10 line
- IL1beta
- IL1beta line
- New Data Table...

Info

- Project info 1
- Project info 1
- New Info...

Results

- Transpose of TNF
- RM one-way ANOVA of Transpose of TNF
- Transpose of IL6
- RM one-way ANOVA of Transpose of IL6**
- Transpose of IL-10
- RM one-way ANOVA of Transpose of IL-10
- Transpose of IL1beta
- RM one-way ANOVA of Transpose of IL1beta

Family

- IL6
- Transpose
- RM one-way ANOVA**

| RM one-way ANOVA     |                                   |            |                    |              |             |                  |    |        |    |
|----------------------|-----------------------------------|------------|--------------------|--------------|-------------|------------------|----|--------|----|
| Multiple comparisons |                                   |            |                    |              |             |                  |    |        |    |
| 1                    | Number of families                | 1          |                    |              |             |                  |    |        |    |
| 2                    | Number of comparisons per family  | 15         |                    |              |             |                  |    |        |    |
| 3                    | Alpha                             | 0.05       |                    |              |             |                  |    |        |    |
| 4                    |                                   |            |                    |              |             |                  |    |        |    |
| 5                    | Tukey's multiple comparisons test | Mean Diff. | 95.00% CI of diff. | Significant? | Summary     | Adjusted P Value |    |        |    |
| 6                    | RBCL vs. iRBCL                    | -1.863     | -21.27 to 17.54    | No           | ns          | 0.9889           |    | A-B    |    |
| 7                    | RBCL vs. LPS                      | -6139      | -15485 to 3208     | No           | ns          | 0.1458           |    | A-C    |    |
| 8                    | RBCL vs. XO+RBCL                  | -1760      | -5885 to 2365      | No           | ns          | 0.3591           |    | A-D    |    |
| 9                    | RBCL vs. XO+iRBCL                 | -751.4     | -2812 to 1309      | No           | ns          | 0.4650           |    | A-E    |    |
| 10                   | RBCL vs. XO+LPS                   | -5280      | -11907 to 1346     | No           | ns          | 0.0907           |    | A-F    |    |
| 11                   | iRBCL vs. LPS                     | -6137      | -15500 to 3227     | No           | ns          | 0.1466           |    | B-C    |    |
| 12                   | iRBCL vs. XO+RBCL                 | -1758      | -5901 to 2384      | No           | ns          | 0.3626           |    | B-D    |    |
| 13                   | iRBCL vs. XO+iRBCL                | -749.6     | -2826 to 1327      | No           | ns          | 0.4720           |    | B-E    |    |
| 14                   | iRBCL vs. XO+LPS                  | -5278      | -11924 to 1367     | No           | ns          | 0.0915           |    | B-F    |    |
| 15                   | LPS vs. XO+RBCL                   | 4379       | -1151 to 9908      | No           | ns          | 0.0922           |    | C-D    |    |
| 16                   | LPS vs. XO+iRBCL                  | 5387       | -1952 to 12727     | No           | ns          | 0.1115           |    | C-E    |    |
| 17                   | LPS vs. XO+LPS                    | 858.3      | -3861 to 5578      | No           | ns          | 0.8812           |    | C-F    |    |
| 18                   | XO+RBCL vs. XO+iRBCL              | 1009       | -1223 to 3241      | No           | ns          | 0.3235           |    | D-E    |    |
| 19                   | XO+RBCL vs. XO+LPS                | -3520      | -6276 to -764.4    | Yes          | *           | 0.0255           |    | D-F    |    |
| 20                   | XO+iRBCL vs. XO+LPS               | -4529      | -9464 to 406.4     | No           | ns          | 0.0629           |    | E-F    |    |
| 21                   |                                   |            |                    |              |             |                  |    |        |    |
| 22                   | Test details                      | Mean 1     | Mean 2             | Mean Diff.   | SE of diff. | n1               | n2 | q      | DF |
| 23                   | RBCL vs. iRBCL                    | 5.953      | 7.815              | -1.863       | 3.415       | 4                | 4  | 0.7713 | 3  |
| 24                   | RBCL vs. LPS                      | 5.953      | 6145               | -6139        | 1645        | 4                | 4  | 5.279  | 3  |
| 25                   | RBCL vs. XO+RBCL                  | 5.953      | 1766               | -1760        | 725.8       | 4                | 4  | 3.429  | 3  |
| 26                   | RBCL vs. XO+iRBCL                 | 5.953      | 757.4              | -751.4       | 362.6       | 4                | 4  | 2.931  | 3  |
| 27                   | RBCL vs. XO+LPS                   | 5.953      | 5286               | -5280        | 1166        | 4                | 4  | 6.404  | 3  |
| 28                   | iRBCL vs. LPS                     | 7.815      | 6145               | -6137        | 1648        | 4                | 4  | 5.268  | 3  |
| 29                   | iRBCL vs. XO+RBCL                 | 7.815      | 1766               | -1758        | 728.9       | 4                | 4  | 3.411  | 3  |
| 30                   | iRBCL vs. XO+iRBCL                | 7.815      | 757.4              | -749.6       | 365.3       | 4                | 4  | 2.902  | 3  |
| 31                   | iRBCL vs. XO+LPS                  | 7.815      | 5286               | -5278        | 1169        | 4                | 4  | 6.384  | 3  |
| 32                   | LPS vs. XO+RBCL                   | 6145       | 1766               | 4379         | 973.0       | 4                | 4  | 6.364  | 3  |
| 33                   | LPS vs. XO+iRBCL                  | 6145       | 757.4              | 5387         | 1009        | 4                | 4  | 5.000  | 3  |

Row 1, Column A



SourceDataforFigure5A

File Sheet Undo Clipboard Analysis Interpret Change Draw Write Text Export Print Send LA Help

Prism8

Search ANOVA results Multiple comparisons

Data Tables: TNF, TNF line, IL6, IL6 line, IL-10, IL-10 line, IL1beta, IL1beta line, New Data Table...

Info: Project info 1, Project info 1, New Info...

Results: Transpose of TNF, RM one-way ANOVA of Transpose of TNF, Transpose of IL6, **RM one-way ANOVA of Transpose of IL6**, Transpose of IL-10, RM one-way ANOVA of Transpose of IL-10, Transpose of IL1beta, RM one-way ANOVA of Transpose of IL1beta

Family: IL6, Transpose, **RM one-way ANOVA**

| 15 | LPS vs. XO+RBCL      | 4379          | -1151 to 9908   | No                | ns                 | 0.0922    |           | C-D      |           |  |
|----|----------------------|---------------|-----------------|-------------------|--------------------|-----------|-----------|----------|-----------|--|
| 16 | LPS vs. XO+RBCL      | 5387          | -1952 to 12727  | No                | ns                 | 0.1115    |           | C-E      |           |  |
| 17 | LPS vs. XO+LPS       | 858.3         | -3861 to 5578   | No                | ns                 | 0.8812    |           | C-F      |           |  |
| 18 | XO+RBCL vs. XO+RBCL  | 1009          | -1223 to 3241   | No                | ns                 | 0.3235    |           | D-E      |           |  |
| 19 | XO+RBCL vs. XO+LPS   | -3520         | -6276 to -764.4 | Yes               | *                  | 0.0255    |           | D-F      |           |  |
| 20 | XO+RBCL vs. XO+LPS   | -4529         | -9464 to 406.4  | No                | ns                 | 0.0629    |           | E-F      |           |  |
| 21 |                      |               |                 |                   |                    |           |           |          |           |  |
| 22 | <b>Test details</b>  | <b>Mean 1</b> | <b>Mean 2</b>   | <b>Mean Diff.</b> | <b>SE of diff.</b> | <b>n1</b> | <b>n2</b> | <b>q</b> | <b>DF</b> |  |
| 23 | RBCL vs. iRBCL       | 5.953         | 7.815           | -1.863            | 3.415              | 4         | 4         | 0.7713   | 3         |  |
| 24 | RBCL vs. LPS         | 5.953         | 6145            | -6139             | 1645               | 4         | 4         | 5.279    | 3         |  |
| 25 | RBCL vs. XO+RBCL     | 5.953         | 1766            | -1760             | 725.8              | 4         | 4         | 3.429    | 3         |  |
| 26 | RBCL vs. XO+iRBCL    | 5.953         | 757.4           | -751.4            | 362.6              | 4         | 4         | 2.931    | 3         |  |
| 27 | RBCL vs. XO+LPS      | 5.953         | 5286            | -5280             | 1166               | 4         | 4         | 6.404    | 3         |  |
| 28 | iRBCL vs. LPS        | 7.815         | 6145            | -6137             | 1648               | 4         | 4         | 5.268    | 3         |  |
| 29 | iRBCL vs. XO+RBCL    | 7.815         | 1766            | -1758             | 728.9              | 4         | 4         | 3.411    | 3         |  |
| 30 | iRBCL vs. XO+RBCL    | 7.815         | 757.4           | -749.6            | 365.3              | 4         | 4         | 2.902    | 3         |  |
| 31 | iRBCL vs. XO+LPS     | 7.815         | 5286            | -5278             | 1169               | 4         | 4         | 6.384    | 3         |  |
| 32 | LPS vs. XO+RBCL      | 6145          | 1766            | 4379              | 973.0              | 4         | 4         | 6.364    | 3         |  |
| 33 | LPS vs. XO+RBCL      | 6145          | 757.4           | 5387              | 1291               | 4         | 4         | 5.899    | 3         |  |
| 34 | LPS vs. XO+LPS       | 6145          | 5286            | 858.3             | 830.4              | 4         | 4         | 1.462    | 3         |  |
| 35 | XO+RBCL vs. XO+iRBCL | 1766          | 757.4           | 1009              | 392.8              | 4         | 4         | 3.632    | 3         |  |
| 36 | XO+RBCL vs. XO+LPS   | 1766          | 5286            | -3520             | 484.9              | 4         | 4         | 10.27    | 3         |  |
| 37 | XO+RBCL vs. XO+LPS   | 757.4         | 5286            | -4529             | 868.4              | 4         | 4         | 7.375    | 3         |  |
| 38 |                      |               |                 |                   |                    |           |           |          |           |  |
| 39 |                      |               |                 |                   |                    |           |           |          |           |  |
| 40 |                      |               |                 |                   |                    |           |           |          |           |  |
| 41 |                      |               |                 |                   |                    |           |           |          |           |  |
| 42 |                      |               |                 |                   |                    |           |           |          |           |  |
| 43 |                      |               |                 |                   |                    |           |           |          |           |  |
| 44 |                      |               |                 |                   |                    |           |           |          |           |  |
| 45 |                      |               |                 |                   |                    |           |           |          |           |  |
| 46 |                      |               |                 |                   |                    |           |           |          |           |  |
| 47 |                      |               |                 |                   |                    |           |           |          |           |  |

RM one-way ANOVA of Transpose of IL6 Row 1, Column A

SourceDataforFigure5A

File Sheet Undo Clipboard Analysis Interpret Change Draw Write Text Export Print Send LA Help

Prism 8

Search

▼ Data Tables

- TNF
- TNF line
- IL6
- IL6 line
- IL-10**
- IL-10 line
- IL1beta
- IL1beta line
- New Data Table...

▼ Info

- Project info 1
- Project info 1
- New Info...

▼ Results

- Transpose of TNF
- RM one-way ANOVA of Transpose of TNF
- Transpose of IL6
- RM one-way ANOVA of Transpose of IL6
- Transpose of IL-10**
- RM one-way ANOVA of Transpose of IL-10**
- Transpose of IL1beta
- RM one-way ANOVA of Transpose of IL1beta

Family

- IL-10
  - Transpose
  - RM one-way ANOVA

| Transpose |         | A     | B     | C      | D       | E        | F      | G     | H     | I     | J     | K     | L     |
|-----------|---------|-------|-------|--------|---------|----------|--------|-------|-------|-------|-------|-------|-------|
|           |         | RBCL  | iRBCL | LPS    | XO+RBCL | XO+iRBCL | XO+LPS | Title | Title | Title | Title | Title | Title |
|           |         | Y     | Y     | Y      | Y       | Y        | Y      | Y     | Y     | Y     | Y     | Y     | Y     |
| 1         | Donor 1 | 1.000 | 1.000 | 33.740 | 7.700   | 21.350   | 31.250 |       |       |       |       |       |       |
| 2         | Donor 2 | 2.510 | 2.410 | 35.260 | 41.390  | 52.700   | 48.500 |       |       |       |       |       |       |
| 3         | Donor 3 | 1.000 | 1.000 | 4.920  | 5.590   | 10.340   | 7.170  |       |       |       |       |       |       |
| 4         | Donor 4 | 1.000 | 2.080 | 13.710 | 6.030   | 18.250   | 16.270 |       |       |       |       |       |       |
| 5         |         |       |       |        |         |          |        |       |       |       |       |       |       |
| 6         |         |       |       |        |         |          |        |       |       |       |       |       |       |
| 7         |         |       |       |        |         |          |        |       |       |       |       |       |       |
| 8         |         |       |       |        |         |          |        |       |       |       |       |       |       |
| 9         |         |       |       |        |         |          |        |       |       |       |       |       |       |
| 10        |         |       |       |        |         |          |        |       |       |       |       |       |       |
| 11        |         |       |       |        |         |          |        |       |       |       |       |       |       |
| 12        |         |       |       |        |         |          |        |       |       |       |       |       |       |
| 13        |         |       |       |        |         |          |        |       |       |       |       |       |       |
| 14        |         |       |       |        |         |          |        |       |       |       |       |       |       |
| 15        |         |       |       |        |         |          |        |       |       |       |       |       |       |
| 16        |         |       |       |        |         |          |        |       |       |       |       |       |       |
| 17        |         |       |       |        |         |          |        |       |       |       |       |       |       |
| 18        |         |       |       |        |         |          |        |       |       |       |       |       |       |
| 19        |         |       |       |        |         |          |        |       |       |       |       |       |       |
| 20        |         |       |       |        |         |          |        |       |       |       |       |       |       |
| 21        |         |       |       |        |         |          |        |       |       |       |       |       |       |
| 22        |         |       |       |        |         |          |        |       |       |       |       |       |       |
| 23        |         |       |       |        |         |          |        |       |       |       |       |       |       |
| 24        |         |       |       |        |         |          |        |       |       |       |       |       |       |
| 25        |         |       |       |        |         |          |        |       |       |       |       |       |       |
| 26        |         |       |       |        |         |          |        |       |       |       |       |       |       |
| 27        |         |       |       |        |         |          |        |       |       |       |       |       |       |
| 28        |         |       |       |        |         |          |        |       |       |       |       |       |       |
| 29        |         |       |       |        |         |          |        |       |       |       |       |       |       |
| 30        |         |       |       |        |         |          |        |       |       |       |       |       |       |
| 31        |         |       |       |        |         |          |        |       |       |       |       |       |       |
| 32        |         |       |       |        |         |          |        |       |       |       |       |       |       |
| 33        |         |       |       |        |         |          |        |       |       |       |       |       |       |
| 34        |         |       |       |        |         |          |        |       |       |       |       |       |       |

Transpose of IL-10

Row 1, A: RBCL

SourceDataforFigure5A

File Sheet Undo Clipboard Analysis Interpret Change Draw Write Text Export Print Send LA Help

Prism 8

Search ANOVA results Multiple comparisons

▼ Data Tables

- TNF
- TNF line
- IL6
- IL6 line
- IL-10
- IL-10 line
- IL1beta
- IL1beta line
- New Data Table...

▼ Info

- Project info 1
- Project info 1
- New Info...

▼ Results

- Transpose of TNF
- RM one-way ANOVA of Transpose of TNF
- Transpose of IL6
- RM one-way ANOVA of Transpose of IL6
- Transpose of IL-10
- RM one-way ANOVA of Transpose of IL-10
- Transpose of IL1beta
- RM one-way ANOVA of Transpose of IL1beta

Family

- IL-10
- Transpose
- RM one-way ANOVA

| RM one-way ANOVA |                                           |                    |           |           |                          |                |
|------------------|-------------------------------------------|--------------------|-----------|-----------|--------------------------|----------------|
| ANOVA results    |                                           |                    |           |           |                          |                |
| 1                | Table Analyzed                            | Transpose of IL-10 |           |           |                          |                |
| 2                |                                           |                    |           |           |                          |                |
| 3                | <b>Repeated measures ANOVA summary</b>    |                    |           |           |                          |                |
| 4                | Assume sphericity?                        | No                 |           |           |                          |                |
| 5                | F                                         | 5.496              |           |           |                          |                |
| 6                | P value                                   | 0.0605             |           |           |                          |                |
| 7                | P value summary                           | ns                 |           |           |                          |                |
| 8                | Statistically significant (P < 0.05)?     | No                 |           |           |                          |                |
| 9                | Geisser-Greenhouse's epsilon              | 0.3215             |           |           |                          |                |
| 10               | R square                                  | 0.6469             |           |           |                          |                |
| 11               |                                           |                    |           |           |                          |                |
| 12               | <b>Was the matching effective?</b>        |                    |           |           |                          |                |
| 13               | F                                         | 7.904              |           |           |                          |                |
| 14               | P value                                   | 0.0021             |           |           |                          |                |
| 15               | P value summary                           | **                 |           |           |                          |                |
| 16               | Is there significant matching (P < 0.05)? | Yes                |           |           |                          |                |
| 17               | R square                                  | 0.3582             |           |           |                          |                |
| 18               |                                           |                    |           |           |                          |                |
| 19               | <b>ANOVA table</b>                        | <b>SS</b>          | <b>DF</b> | <b>MS</b> | <b>F (DFn, DFd)</b>      | <b>P value</b> |
| 20               | Treatment (between columns)               | 2568               | 5         | 513.7     | F (1.607, 4.822) = 5.496 | P=0.0605       |
| 21               | Individual (between rows)                 | 2216               | 3         | 738.8     | F (3, 15) = 7.904        | P=0.0021       |
| 22               | Residual (random)                         | 1402               | 15        | 93.47     |                          |                |
| 23               | Total                                     | 6187               | 23        |           |                          |                |
| 24               |                                           |                    |           |           |                          |                |
| 25               | <b>Data summary</b>                       |                    |           |           |                          |                |
| 26               | Number of treatments (columns)            | 6                  |           |           |                          |                |
| 27               | Number of subjects (rows)                 | 4                  |           |           |                          |                |
| 28               | Number of missing values                  | 0                  |           |           |                          |                |
| 29               |                                           |                    |           |           |                          |                |
| 30               |                                           |                    |           |           |                          |                |
| 31               |                                           |                    |           |           |                          |                |
| 32               |                                           |                    |           |           |                          |                |

RM one-way ANOVA of Transpose of IL-10 Row 1, Column A

SourceDataforFigure5A

File Sheet Undo Clipboard Analysis Interpret Change Draw Write Text Export Print Send LA Help

Prism 8

Search

ANOVA results Multiple comparisons

Data Tables

- TNF
- TNF line
- IL6
- IL6 line
- IL-10
- IL-10 line
- IL1beta
- IL1beta line
- New Data Table...

Info

- Project info 1
- Project info 1
- New Info...

Results

- Transpose of TNF
- RM one-way ANOVA of Transpose of TNF
- Transpose of IL6
- RM one-way ANOVA of Transpose of IL6
- Transpose of IL-10
- RM one-way ANOVA of Transpose of IL-10
- Transpose of IL1beta
- RM one-way ANOVA of Transpose of IL1beta

Family

- IL-10
- Transpose
- RM one-way ANOVA

| RM one-way ANOVA     |                                          |                   |                           |                     |                    |                         |           |          |           |
|----------------------|------------------------------------------|-------------------|---------------------------|---------------------|--------------------|-------------------------|-----------|----------|-----------|
| Multiple comparisons |                                          |                   |                           |                     |                    |                         |           |          |           |
| 1                    | Number of families                       | 1                 |                           |                     |                    |                         |           |          |           |
| 2                    | Number of comparisons per family         | 15                |                           |                     |                    |                         |           |          |           |
| 3                    | Alpha                                    | 0.05              |                           |                     |                    |                         |           |          |           |
| 4                    |                                          |                   |                           |                     |                    |                         |           |          |           |
| 5                    | <b>Tukey's multiple comparisons test</b> | <b>Mean Diff.</b> | <b>95.00% CI of diff.</b> | <b>Significant?</b> | <b>Summary</b>     | <b>Adjusted P Value</b> |           |          |           |
| 6                    | RBCL vs. iRBCL                           | -0.2450           | -1.832 to 1.342           | No                  | ns                 | 0.9302                  |           | A-B      |           |
| 7                    | RBCL vs. LPS                             | -20.53            | -61.89 to 20.83           | No                  | ns                 | 0.2696                  |           | A-C      |           |
| 8                    | RBCL vs. XO+RBCL                         | -13.80            | -61.38 to 33.78           | No                  | ns                 | 0.6269                  |           | A-D      |           |
| 9                    | RBCL vs. XO+iRBCL                        | -24.28            | -75.10 to 26.53           | No                  | ns                 | 0.2907                  |           | A-E      |           |
| 10                   | RBCL vs. XO+LPS                          | -24.42            | -74.07 to 25.23           | No                  | ns                 | 0.2747                  |           | A-F      |           |
| 11                   | iRBCL vs. LPS                            | -20.29            | -62.30 to 21.73           | No                  | ns                 | 0.2849                  |           | B-C      |           |
| 12                   | iRBCL vs. XO+RBCL                        | -13.56            | -61.83 to 34.72           | No                  | ns                 | 0.6491                  |           | B-D      |           |
| 13                   | iRBCL vs. XO+iRBCL                       | -24.04            | -75.41 to 27.34           | No                  | ns                 | 0.3029                  |           | B-E      |           |
| 14                   | iRBCL vs. XO+LPS                         | -24.18            | -74.50 to 26.15           | No                  | ns                 | 0.2878                  |           | B-F      |           |
| 15                   | LPS vs. XO+RBCL                          | 6.730             | -33.25 to 46.71           | No                  | ns                 | 0.9068                  |           | C-D      |           |
| 16                   | LPS vs. XO+iRBCL                         | -3.753            | -38.61 to 31.10           | No                  | ns                 | 0.9821                  |           | C-E      |           |
| 17                   | LPS vs. XO+LPS                           | -3.890            | -22.78 to 15.00           | No                  | ns                 | 0.8298                  |           | C-F      |           |
| 18                   | XO+RBCL vs. XO+iRBCL                     | -10.48            | -21.68 to 0.7165          | No                  | ns                 | 0.0597                  |           | D-E      |           |
| 19                   | XO+RBCL vs. XO+LPS                       | -10.62            | -37.14 to 15.90           | No                  | ns                 | 0.4007                  |           | D-F      |           |
| 20                   | XO+iRBCL vs. XO+LPS                      | -0.1375           | -18.81 to 18.53           | No                  | ns                 | >0.9999                 |           | E-F      |           |
| 21                   |                                          |                   |                           |                     |                    |                         |           |          |           |
| 22                   | <b>Test details</b>                      | <b>Mean 1</b>     | <b>Mean 2</b>             | <b>Mean Diff.</b>   | <b>SE of diff.</b> | <b>n1</b>               | <b>n2</b> | <b>q</b> | <b>DF</b> |
| 23                   | RBCL vs. iRBCL                           | 1.378             | 1.623                     | -0.2450             | 0.2793             | 4                       | 4         | 1.240    | 3         |
| 24                   | RBCL vs. LPS                             | 1.378             | 21.91                     | -20.53              | 7.277              | 4                       | 4         | 3.990    | 3         |
| 25                   | RBCL vs. XO+RBCL                         | 1.378             | 15.18                     | -13.80              | 8.372              | 4                       | 4         | 2.331    | 3         |
| 26                   | RBCL vs. XO+iRBCL                        | 1.378             | 25.66                     | -24.28              | 8.941              | 4                       | 4         | 3.841    | 3         |
| 27                   | RBCL vs. XO+LPS                          | 1.378             | 25.80                     | -24.42              | 8.737              | 4                       | 4         | 3.953    | 3         |
| 28                   | iRBCL vs. LPS                            | 1.623             | 21.91                     | -20.29              | 7.392              | 4                       | 4         | 3.881    | 3         |
| 29                   | iRBCL vs. XO+RBCL                        | 1.623             | 15.18                     | -13.56              | 8.495              | 4                       | 4         | 2.256    | 3         |
| 30                   | iRBCL vs. XO+iRBCL                       | 1.623             | 25.66                     | -24.04              | 9.040              | 4                       | 4         | 3.760    | 3         |
| 31                   | iRBCL vs. XO+LPS                         | 1.623             | 25.80                     | -24.18              | 8.856              | 4                       | 4         | 3.861    | 3         |
| 32                   | LPS vs. XO+RBCL                          | 21.91             | 15.18                     | 6.730               | 7.035              | 4                       | 4         | 1.353    | 3         |
| 33                   | LPS vs. XO+iRBCL                         | 21.91             | 15.18                     | 6.730               | 6.432              | 4                       | 4         | 0.852    | 3         |

RM one-way ANOVA of Transpose of IL-10 Row 1, Column A

SourceDataforFigure5A

File Sheet Undo Clipboard Analysis Interpret Change Draw Write Text Export Print Send LA Help

12 Helvetica

Prism8

Search

ANOVA results Multiple comparisons

Data Tables

- TNF
- TNF line
- IL6
- IL6 line
- IL-10
- IL-10 line
- IL1beta
- IL1beta line
- New Data Table...

Info

- Project info 1
- Project info 1
- New Info...

Results

- Transpose of TNF
- RM one-way ANOVA of Transpose of TNF
- Transpose of IL6
- RM one-way ANOVA of Transpose of IL6
- Transpose of IL-10
- RM one-way ANOVA of Transpose of IL-10**
- Transpose of IL1beta
- RM one-way ANOVA of Transpose of IL1beta

Family

- IL-10
- Transpose
- RM one-way ANOVA**

|    |                      | Mean 2           | Mean Diff. | SE of diff. | n1      | n2 | q       | DF |
|----|----------------------|------------------|------------|-------------|---------|----|---------|----|
| 16 | LPS vs. XO+IRBCL     | -38.61 to 31.10  | No         | ns          | 0.9821  |    | C-E     |    |
| 17 | LPS vs. XO+LPS       | -22.78 to 15.00  | No         | ns          | 0.8298  |    | C-F     |    |
| 18 | XO+RBCL vs. XO+IRBCL | -21.68 to 0.7165 | No         | ns          | 0.0597  |    | D-E     |    |
| 19 | XO+RBCL vs. XO+LPS   | -37.14 to 15.90  | No         | ns          | 0.4007  |    | D-F     |    |
| 20 | XO+IRBCL vs. XO+LPS  | -18.81 to 18.53  | No         | ns          | >0.9999 |    | E-F     |    |
| 21 |                      |                  |            |             |         |    |         |    |
| 22 | <b>Test details</b>  |                  |            |             |         |    |         |    |
| 23 | RBCL vs. iRBCL       | 1.623            | -0.2450    | 0.2793      | 4       | 4  | 1.240   | 3  |
| 24 | RBCL vs. LPS         | 21.91            | -20.53     | 7.277       | 4       | 4  | 3.990   | 3  |
| 25 | RBCL vs. XO+RBCL     | 15.18            | -13.80     | 8.372       | 4       | 4  | 2.331   | 3  |
| 26 | RBCL vs. XO+IRBCL    | 25.66            | -24.28     | 8.941       | 4       | 4  | 3.841   | 3  |
| 27 | RBCL vs. XO+LPS      | 25.80            | -24.42     | 8.737       | 4       | 4  | 3.953   | 3  |
| 28 | iRBCL vs. LPS        | 21.91            | -20.29     | 7.392       | 4       | 4  | 3.881   | 3  |
| 29 | iRBCL vs. XO+RBCL    | 15.18            | -13.56     | 8.495       | 4       | 4  | 2.256   | 3  |
| 30 | iRBCL vs. XO+IRBCL   | 25.66            | -24.04     | 9.040       | 4       | 4  | 3.760   | 3  |
| 31 | iRBCL vs. XO+LPS     | 25.80            | -24.18     | 8.856       | 4       | 4  | 3.861   | 3  |
| 32 | LPS vs. XO+RBCL      | 15.18            | 6.730      | 7.035       | 4       | 4  | 1.353   | 3  |
| 33 | LPS vs. XO+IRBCL     | 25.66            | -3.753     | 6.133       | 4       | 4  | 0.8653  | 3  |
| 34 | LPS vs. XO+LPS       | 25.80            | -3.890     | 3.324       | 4       | 4  | 1.655   | 3  |
| 35 | XO+RBCL vs. XO+IRBCL | 25.66            | -10.48     | 1.971       | 4       | 4  | 7.523   | 3  |
| 36 | XO+RBCL vs. XO+LPS   | 25.80            | -10.62     | 4.667       | 4       | 4  | 3.218   | 3  |
| 37 | XO+IRBCL vs. XO+LPS  | 25.80            | -0.1375    | 3.286       | 4       | 4  | 0.05918 | 3  |
| 38 |                      |                  |            |             |         |    |         |    |
| 39 |                      |                  |            |             |         |    |         |    |
| 40 |                      |                  |            |             |         |    |         |    |
| 41 |                      |                  |            |             |         |    |         |    |
| 42 |                      |                  |            |             |         |    |         |    |
| 43 |                      |                  |            |             |         |    |         |    |
| 44 |                      |                  |            |             |         |    |         |    |
| 45 |                      |                  |            |             |         |    |         |    |
| 46 |                      |                  |            |             |         |    |         |    |
| 47 |                      |                  |            |             |         |    |         |    |

RM one-way ANOVA of Transpose of IL-10 Row 1, Column A

SourceDataforFigure5A

File Sheet Undo Clipboard Analysis Interpret Change Draw Write Text Export Print Send LA Help

12 Helvetica

Prism8

Search

▼ Data Tables

- TNF
- TNF line
- IL6
- IL6 line
- IL-10
- IL-10 line
- IL1beta**
- IL1beta line
- New Data Table...

▼ Info

- Project info 1
- Project info 1
- New Info...

▼ Results

- Transpose of TNF
- RM one-way ANOVA of Transpose of TNF
- Transpose of IL6
- RM one-way ANOVA of Transpose of IL6
- Transpose of IL-10
- RM one-way ANOVA of Transpose of IL-10
- Transpose of IL1beta**
- RM one-way ANOVA of Transpose of IL1beta**

Family

- IL1beta
- Transpose
- RM one-way ANOVA

| Transpose |         | A     | B     | C      | D       | E        | F      | G     | H     | I     | J     | K     | L     |
|-----------|---------|-------|-------|--------|---------|----------|--------|-------|-------|-------|-------|-------|-------|
|           |         | RBCL  | iRBCL | LPS    | XO+RBCL | XO+iRBCL | XO+LPS | Title | Title | Title | Title | Title | Title |
|           |         | Y     | Y     | Y      | Y       | Y        | Y      | Y     | Y     | Y     | Y     | Y     | Y     |
| 1         | Donor 1 | 1.000 | 1.000 | 29.880 | 6.510   | 27.280   | 1.000  |       |       |       |       |       |       |
| 2         | Donor 2 | 1.000 | 1.000 | 20.480 | 24.010  | 43.070   | 34.690 |       |       |       |       |       |       |
| 3         | Donor 3 | 1.000 | 1.000 | 19.940 | 4.050   | 24.980   | 14.650 |       |       |       |       |       |       |
| 4         | Donor 4 | 1.000 | 1.000 | 6.030  | 1.000   | 15.350   | 9.690  |       |       |       |       |       |       |
| 5         |         |       |       |        |         |          |        |       |       |       |       |       |       |
| 6         |         |       |       |        |         |          |        |       |       |       |       |       |       |
| 7         |         |       |       |        |         |          |        |       |       |       |       |       |       |
| 8         |         |       |       |        |         |          |        |       |       |       |       |       |       |
| 9         |         |       |       |        |         |          |        |       |       |       |       |       |       |
| 10        |         |       |       |        |         |          |        |       |       |       |       |       |       |
| 11        |         |       |       |        |         |          |        |       |       |       |       |       |       |
| 12        |         |       |       |        |         |          |        |       |       |       |       |       |       |
| 13        |         |       |       |        |         |          |        |       |       |       |       |       |       |
| 14        |         |       |       |        |         |          |        |       |       |       |       |       |       |
| 15        |         |       |       |        |         |          |        |       |       |       |       |       |       |
| 16        |         |       |       |        |         |          |        |       |       |       |       |       |       |
| 17        |         |       |       |        |         |          |        |       |       |       |       |       |       |
| 18        |         |       |       |        |         |          |        |       |       |       |       |       |       |
| 19        |         |       |       |        |         |          |        |       |       |       |       |       |       |
| 20        |         |       |       |        |         |          |        |       |       |       |       |       |       |
| 21        |         |       |       |        |         |          |        |       |       |       |       |       |       |
| 22        |         |       |       |        |         |          |        |       |       |       |       |       |       |
| 23        |         |       |       |        |         |          |        |       |       |       |       |       |       |
| 24        |         |       |       |        |         |          |        |       |       |       |       |       |       |
| 25        |         |       |       |        |         |          |        |       |       |       |       |       |       |
| 26        |         |       |       |        |         |          |        |       |       |       |       |       |       |
| 27        |         |       |       |        |         |          |        |       |       |       |       |       |       |
| 28        |         |       |       |        |         |          |        |       |       |       |       |       |       |
| 29        |         |       |       |        |         |          |        |       |       |       |       |       |       |
| 30        |         |       |       |        |         |          |        |       |       |       |       |       |       |
| 31        |         |       |       |        |         |          |        |       |       |       |       |       |       |
| 32        |         |       |       |        |         |          |        |       |       |       |       |       |       |
| 33        |         |       |       |        |         |          |        |       |       |       |       |       |       |
| 34        |         |       |       |        |         |          |        |       |       |       |       |       |       |

Transpose of IL1beta

Row 1, A: RBCL

SourceDataforFigure5A

File Sheet Undo Clipboard Analysis Interpret Change Draw Write Text Export Print Send LA Help

12 Helvetica

Prism 8

Search ANOVA results Multiple comparisons

▼ Data Tables

- IL6 line
- IL-10
- IL-10 line
- IL1beta**
- IL1beta line
- New Data Table...

▼ Info

- Project info 1
- Project info 1
- New Info...

▼ Results

- Transpose of TNF
- RM one-way ANOVA of Transpose of TNF
- Transpose of IL6
- RM one-way ANOVA of Transpose of IL6
- Transpose of IL-10
- RM one-way ANOVA of Transpose of IL-10
- Transpose of IL1beta**
- RM one-way ANOVA of Transpose of IL1beta**
- New Analysis...

▼ Graphs

- TNF
- TNF line

Family

- IL1beta
- Transpose
- RM one-way ANOVA**

| RM one-way ANOVA |                                           |           |           |           |                     |                |
|------------------|-------------------------------------------|-----------|-----------|-----------|---------------------|----------------|
| ANOVA results    |                                           |           |           |           |                     |                |
| 8                | Statistically significant (P < 0.05)?     | Yes       |           |           |                     |                |
| 9                | Geisser-Greenhouse's epsilon              | 0.3595    |           |           |                     |                |
| 10               | R square                                  | 0.7093    |           |           |                     |                |
| 11               |                                           |           |           |           |                     |                |
| 12               | <b>Was the matching effective?</b>        |           |           |           |                     |                |
| 13               | F                                         | 3.871     |           |           |                     |                |
| 14               | P value                                   | 0.0311    |           |           |                     |                |
| 15               | P value summary                           | *         |           |           |                     |                |
| 16               | Is there significant matching (P < 0.05)? | Yes       |           |           |                     |                |
| 17               | R square                                  | 0.1837    |           |           |                     |                |
| 18               |                                           |           |           |           |                     |                |
| 19               | <b>ANOVA table</b>                        | <b>SS</b> | <b>DF</b> | <b>MS</b> | <b>F (DFn, DFd)</b> | <b>P value</b> |
| 20               | Treatment (between columns)               | 2225      | 5         | 445.1     | F (1.798, 5.393)    | P=0.0305       |
| 21               | Individual (between rows)                 | 706.0     | 3         | 235.3     | F (3, 15) = 3.87    | P=0.0311       |
| 22               | Residual (random)                         | 911.9     | 15        | 60.79     |                     |                |
| 23               | Total                                     | 3843      | 23        |           |                     |                |
| 24               |                                           |           |           |           |                     |                |
| 25               | <b>Data summary</b>                       |           |           |           |                     |                |
| 26               | Number of treatments (columns)            | 6         |           |           |                     |                |
| 27               | Number of subjects (rows)                 | 4         |           |           |                     |                |
| 28               | Number of missing values                  | 0         |           |           |                     |                |
| 29               |                                           |           |           |           |                     |                |
| 30               |                                           |           |           |           |                     |                |
| 31               |                                           |           |           |           |                     |                |
| 32               |                                           |           |           |           |                     |                |
| 33               |                                           |           |           |           |                     |                |
| 34               |                                           |           |           |           |                     |                |
| 35               |                                           |           |           |           |                     |                |
| 36               |                                           |           |           |           |                     |                |
| 37               |                                           |           |           |           |                     |                |
| 38               |                                           |           |           |           |                     |                |
| 39               |                                           |           |           |           |                     |                |
| 40               |                                           |           |           |           |                     |                |

RM one-way ANOVA of Transpose of IL1beta Row 1, Column A

SourceDataforFigure5A

File Sheet Undo Clipboard Analysis Interpret Change Draw Write Text Export Print Send LA Help

Prism 8

Search ANOVA results Multiple comparisons

▼ Data Tables

- IL6 line
- IL-10
- IL-10 line
- IL1beta
- IL1beta line
- New Data Table...

▼ Info

- Project info 1
- Project info 1
- New Info...

▼ Results

- Transpose of TNF
- RM one-way ANOVA of Transpose of TNF
- Transpose of IL6
- RM one-way ANOVA of Transpose of IL6
- Transpose of IL-10
- RM one-way ANOVA of Transpose of IL-10
- Transpose of IL1beta
- RM one-way ANOVA of Transpose of IL1beta
- New Analysis...

▼ Graphs

- TNF
- TNF line

Family

- IL1beta
- Transpose
- RM one-way ANOVA

| RM one-way ANOVA     |                                    |                   |                           |                     |                    |                         |           |          |           |  |     |
|----------------------|------------------------------------|-------------------|---------------------------|---------------------|--------------------|-------------------------|-----------|----------|-----------|--|-----|
| Multiple comparisons |                                    |                   |                           |                     |                    |                         |           |          |           |  |     |
| 1                    | Number of families                 | 1                 |                           |                     |                    |                         |           |          |           |  |     |
| 2                    | Number of comparisons per family   | 14                |                           |                     |                    |                         |           |          |           |  |     |
| 3                    | Alpha                              | 0.05              |                           |                     |                    |                         |           |          |           |  |     |
| 4                    |                                    |                   |                           |                     |                    |                         |           |          |           |  |     |
| 5                    | <b>Tukey's multiple comparison</b> | <b>Mean Diff.</b> | <b>95.00% CI of diff.</b> | <b>Significant?</b> | <b>Summary</b>     | <b>Adjusted P Value</b> |           |          |           |  |     |
| 6                    | RBCL vs. LPS                       | -18.08            | -33.72 to -2.447          | Yes                 |                    |                         |           |          |           |  | A-C |
| 7                    | RBCL vs. XO+RBCL                   | -7.893            | -24.33 to 8.540           | No                  |                    |                         |           |          |           |  | A-D |
| 8                    | RBCL vs. XO+iRBCL                  | -26.67            | -44.96 to -8.381          | Yes                 |                    |                         |           |          |           |  | A-E |
| 9                    | RBCL vs. XO+LPS                    | -14.01            | -36.73 to 8.720           | No                  |                    |                         |           |          |           |  | A-F |
| 10                   | iRBCL vs. LPS                      | -18.08            | -33.72 to -2.447          | Yes                 |                    |                         |           |          |           |  | B-C |
| 11                   | iRBCL vs. XO+RBCL                  | -7.893            | -24.33 to 8.540           | No                  |                    |                         |           |          |           |  | B-D |
| 12                   | iRBCL vs. XO+iRBCL                 | -26.67            | -44.96 to -8.381          | Yes                 |                    |                         |           |          |           |  | B-E |
| 13                   | iRBCL vs. XO+LPS                   | -14.01            | -36.73 to 8.720           | No                  |                    |                         |           |          |           |  | B-F |
| 14                   | LPS vs. XO+RBCL                    | 10.19             | -8.661 to 29.04           | No                  |                    |                         |           |          |           |  | C-D |
| 15                   | LPS vs. XO+iRBCL                   | -8.588            | -25.39 to 8.211           | No                  |                    |                         |           |          |           |  | C-E |
| 16                   | LPS vs. XO+LPS                     | 4.075             | -25.14 to 33.29           | No                  |                    |                         |           |          |           |  | C-F |
| 17                   | XO+RBCL vs. XO+iRBCL               | -18.78            | -23.66 to -13.89          | Yes                 |                    |                         |           |          |           |  | D-E |
| 18                   | XO+RBCL vs. XO+LPS                 | -6.115            | -18.53 to 6.304           | No                  |                    |                         |           |          |           |  | D-F |
| 19                   | XO+iRBCL vs. XO+LPS                | 12.66             | -2.101 to 27.43           | No                  |                    |                         |           |          |           |  | E-F |
| 20                   |                                    |                   |                           |                     |                    |                         |           |          |           |  |     |
| 21                   | <b>Test details</b>                | <b>Mean 1</b>     | <b>Mean 2</b>             | <b>Mean Diff.</b>   | <b>SE of diff.</b> | <b>n1</b>               | <b>n2</b> | <b>q</b> | <b>DF</b> |  |     |
| 22                   | RBCL vs. iRBCL                     | 1.000             | 1.000                     | 0.000               | 0.000              | 4                       | 4         |          |           |  |     |
| 23                   | RBCL vs. LPS                       | 1.000             | 19.08                     | -18.08              | 4.913              | 4                       | 4         | 3.681    | 3         |  |     |
| 24                   | RBCL vs. XO+RBCL                   | 1.000             | 8.893                     | -7.893              | 5.164              | 4                       | 4         | 1.528    | 3         |  |     |
| 25                   | RBCL vs. XO+iRBCL                  | 1.000             | 27.67                     | -26.67              | 5.747              | 4                       | 4         | 4.641    | 3         |  |     |
| 26                   | RBCL vs. XO+LPS                    | 1.000             | 15.01                     | -14.01              | 7.142              | 4                       | 4         | 1.961    | 3         |  |     |
| 27                   | iRBCL vs. LPS                      | 1.000             | 19.08                     | -18.08              | 4.913              | 4                       | 4         | 3.681    | 3         |  |     |
| 28                   | iRBCL vs. XO+RBCL                  | 1.000             | 8.893                     | -7.893              | 5.164              | 4                       | 4         | 1.528    | 3         |  |     |
| 29                   | iRBCL vs. XO+iRBCL                 | 1.000             | 27.67                     | -26.67              | 5.747              | 4                       | 4         | 4.641    | 3         |  |     |
| 30                   | iRBCL vs. XO+LPS                   | 1.000             | 15.01                     | -14.01              | 7.142              | 4                       | 4         | 1.961    | 3         |  |     |
| 31                   | LPS vs. XO+RBCL                    | 19.08             | 8.893                     | 10.19               | 5.924              | 4                       | 4         | 1.720    | 3         |  |     |
| 32                   | LPS vs. XO+iRBCL                   | 19.08             | 27.67                     | -8.588              | 5.279              | 4                       | 4         | 1.627    | 3         |  |     |
| 33                   | LPS vs. XO+LPS                     | 19.08             | 15.01                     | 4.075               | 6.478              | 4                       | 4         | 0.1448   | 3         |  |     |

RM one-way ANOVA of Transpose of IL1beta Row 1, Column A



SourceDataforFigure5A

File Sheet Undo Clipboard Analysis Interpret Change Draw Write Text Export Print Send LA Help

Prism8

Search ANOVA results Multiple comparisons

Data Tables: IL6 line, IL-10, IL-10 line, **IL1beta**, IL1beta line, New Data Table...

Info: Project info 1, Project info 1, New Info...

Results: Transpose of TNF, RM one-way ANOVA of Transpose of TNF, Transpose of IL6, RM one-way ANOVA of Transpose of IL6, Transpose of IL-10, RM one-way ANOVA of Transpose of IL-10, **Transpose of IL1beta**, **RM one-way ANOVA of Transpose of IL1beta**, New Analysis...

Graphs: TNF, TNF line

Family: IL1beta, Transpose, **RM one-way ANOVA**

|    |                      | Mean 1        | Mean 2          | Mean Diff.        | SE of diff.        | n1        | n2        | q        | DF        |
|----|----------------------|---------------|-----------------|-------------------|--------------------|-----------|-----------|----------|-----------|
| 18 | XO+RBCL vs. XO+LPS   | -6.115        | -18.53 to 6.304 | No                |                    |           |           |          | D-F       |
| 19 | XO+IRBCL vs. XO+LPS  | 12.66         | -2.101 to 27.43 | No                |                    |           |           |          | E-F       |
| 20 |                      |               |                 |                   |                    |           |           |          |           |
| 21 | <b>Test details</b>  | <b>Mean 1</b> | <b>Mean 2</b>   | <b>Mean Diff.</b> | <b>SE of diff.</b> | <b>n1</b> | <b>n2</b> | <b>q</b> | <b>DF</b> |
| 22 | RBCL vs. iRBCL       | 1.000         | 1.000           | 0.000             | 0.000              | 4         | 4         |          |           |
| 23 | RBCL vs. LPS         | 1.000         | 19.08           | -18.08            | 4.913              | 4         | 4         | 3.681    | 3         |
| 24 | RBCL vs. XO+RBCL     | 1.000         | 8.893           | -7.893            | 5.164              | 4         | 4         | 1.528    | 3         |
| 25 | RBCL vs. XO+IRBCL    | 1.000         | 27.67           | -26.67            | 5.747              | 4         | 4         | 4.641    | 3         |
| 26 | RBCL vs. XO+LPS      | 1.000         | 15.01           | -14.01            | 7.142              | 4         | 4         | 1.961    | 3         |
| 27 | iRBCL vs. LPS        | 1.000         | 19.08           | -18.08            | 4.913              | 4         | 4         | 3.681    | 3         |
| 28 | iRBCL vs. XO+RBCL    | 1.000         | 8.893           | -7.893            | 5.164              | 4         | 4         | 1.528    | 3         |
| 29 | iRBCL vs. XO+IRBCL   | 1.000         | 27.67           | -26.67            | 5.747              | 4         | 4         | 4.641    | 3         |
| 30 | iRBCL vs. XO+LPS     | 1.000         | 15.01           | -14.01            | 7.142              | 4         | 4         | 1.961    | 3         |
| 31 | LPS vs. XO+RBCL      | 19.08         | 8.893           | 10.19             | 5.924              | 4         | 4         | 1.720    | 3         |
| 32 | LPS vs. XO+IRBCL     | 19.08         | 27.67           | -8.588            | 5.279              | 4         | 4         | 1.627    | 3         |
| 33 | LPS vs. XO+LPS       | 19.08         | 15.01           | 4.075             | 9.178              | 4         | 4         | 0.4440   | 3         |
| 34 | XO+RBCL vs. XO+IRBCL | 8.893         | 27.67           | -18.78            | 1.535              | 4         | 4         | 12.23    | 3         |
| 35 | XO+RBCL vs. XO+LPS   | 8.893         | 15.01           | -6.115            | 3.902              | 4         | 4         | 1.567    | 3         |
| 36 | XO+IRBCL vs. XO+LPS  | 27.67         | 15.01           | 12.66             | 4.639              | 4         | 4         | 2.730    | 3         |
| 37 |                      |               |                 |                   |                    |           |           |          |           |
| 38 |                      |               |                 |                   |                    |           |           |          |           |
| 39 |                      |               |                 |                   |                    |           |           |          |           |
| 40 |                      |               |                 |                   |                    |           |           |          |           |
| 41 |                      |               |                 |                   |                    |           |           |          |           |
| 42 |                      |               |                 |                   |                    |           |           |          |           |
| 43 |                      |               |                 |                   |                    |           |           |          |           |
| 44 |                      |               |                 |                   |                    |           |           |          |           |
| 45 |                      |               |                 |                   |                    |           |           |          |           |
| 46 |                      |               |                 |                   |                    |           |           |          |           |
| 47 |                      |               |                 |                   |                    |           |           |          |           |
| 48 |                      |               |                 |                   |                    |           |           |          |           |
| 49 |                      |               |                 |                   |                    |           |           |          |           |
| 50 |                      |               |                 |                   |                    |           |           |          |           |

RM one-way ANOVA of Transpose of IL1beta Row 1, Column A

File Sheet Undo Clipboard Analysis Change Import Draw Write Text Export Print Send LA Help

12 Helvetica

Prism 8

| Table format: |       | Group A | Group B | Group C | Group D | Group E | Group F | Group G | Group H | Group I | Group J | Group K | Group L | Group M | Group N |
|---------------|-------|---------|---------|---------|---------|---------|---------|---------|---------|---------|---------|---------|---------|---------|---------|
| Grouped       |       | Donor1  | Donor 2 | Title   | Title   | Title   | Title   | Title   | Title   | Title   | Title   | Title   | Title   | Title   | Title   |
|               |       | Y       | Y       | Y       | Y       | Y       | Y       | Y       | Y       | Y       | Y       | Y       | Y       | Y       | Y       |
| 1             | RBCL  | 1.00    | 1.00    |         |         |         |         |         |         |         |         |         |         |         |         |
| 2             | IRBCL | 1.00    | 1.00    |         |         |         |         |         |         |         |         |         |         |         |         |
| 3             | Title | 3.47    | 3.11    |         |         |         |         |         |         |         |         |         |         |         |         |
| 4             | Title | 3.90    | 3.75    |         |         |         |         |         |         |         |         |         |         |         |         |
| 5             | Title | 4.30    | 3.61    |         |         |         |         |         |         |         |         |         |         |         |         |
| 6             | Title | 3.12    | 8.74    |         |         |         |         |         |         |         |         |         |         |         |         |
| 7             | Title | 22.37   | 10.30   |         |         |         |         |         |         |         |         |         |         |         |         |
| 8             | Title | 35.89   | 40.89   |         |         |         |         |         |         |         |         |         |         |         |         |
| 9             | Title |         |         |         |         |         |         |         |         |         |         |         |         |         |         |
| 10            | Title |         |         |         |         |         |         |         |         |         |         |         |         |         |         |
| 11            | Title |         |         |         |         |         |         |         |         |         |         |         |         |         |         |
| 12            | Title |         |         |         |         |         |         |         |         |         |         |         |         |         |         |
| 13            | Title |         |         |         |         |         |         |         |         |         |         |         |         |         |         |
| 14            | Title |         |         |         |         |         |         |         |         |         |         |         |         |         |         |
| 15            | Title |         |         |         |         |         |         |         |         |         |         |         |         |         |         |
| 16            | Title |         |         |         |         |         |         |         |         |         |         |         |         |         |         |
| 17            | Title |         |         |         |         |         |         |         |         |         |         |         |         |         |         |
| 18            | Title |         |         |         |         |         |         |         |         |         |         |         |         |         |         |
| 19            | Title |         |         |         |         |         |         |         |         |         |         |         |         |         |         |
| 20            | Title |         |         |         |         |         |         |         |         |         |         |         |         |         |         |
| 21            | Title |         |         |         |         |         |         |         |         |         |         |         |         |         |         |
| 22            | Title |         |         |         |         |         |         |         |         |         |         |         |         |         |         |
| 23            | Title |         |         |         |         |         |         |         |         |         |         |         |         |         |         |
| 24            | Title |         |         |         |         |         |         |         |         |         |         |         |         |         |         |
| 25            | Title |         |         |         |         |         |         |         |         |         |         |         |         |         |         |
| 26            | Title |         |         |         |         |         |         |         |         |         |         |         |         |         |         |
| 27            | Title |         |         |         |         |         |         |         |         |         |         |         |         |         |         |
| 28            | Title |         |         |         |         |         |         |         |         |         |         |         |         |         |         |
| 29            | Title |         |         |         |         |         |         |         |         |         |         |         |         |         |         |

SourceDataforFigure5C — Edited

Prism 8

File Sheet Undo Clipboard Analysis Change Import Draw Write Text Export Print Send LA Help

Search

▼ Data Tables

- IL8
- IL8 line
- CCL5
- CCL5 line
- CXCL9
- CXCL9 line
- CCL2
- CCL2 line
- New Data Table...

▼ Info

- Project info 1
- Project info 1
- New Info...

▼ Results

- Transpose of IL8
- Col Stats of IL8
- Transform of Transpose of IL8

Family

- IL8
  - Col Stats
  - Transpose
    - Transform
      - Mann-Whitney test
      - Ordinary one-way ANOVA
- IL8

| Table format: |          | Group A     | Group B     | Group C    | Group D    | Group E | Group F | Group G | Group H | Group I | Group J | Group K | Group L | Group M |
|---------------|----------|-------------|-------------|------------|------------|---------|---------|---------|---------|---------|---------|---------|---------|---------|
| Grouped       |          | Donor 1     | Donor 2     | Donor 3    | Donor 4    | Title   | Title   | Title   | Title   | Title   | Title   | Title   | Title   | Title   |
|               | Y        | Y           | Y           | Y          | Y          | Y       | Y       | Y       | Y       | Y       | Y       | Y       | Y       | Y       |
| 1             | RBCL     | 1.414554    | 2.893639    | 2.064177   | 3.476128   |         |         |         |         |         |         |         |         |         |
| 2             | iRBCL    | 7.445835    | 3.254456    | 34.672110  | 5.946987   |         |         |         |         |         |         |         |         |         |
| 3             | LPS      | 120.698700  | 50.037240   | 87.836060  | 62.060260  |         |         |         |         |         |         |         |         |         |
| 4             | XO+RBCL  | 55.886070   | 45.980950   | 63.665700  | 35.787290  |         |         |         |         |         |         |         |         |         |
| 5             | XO+iRBCL | 1024.125000 | 3490.260000 | 399.502500 | 568.797500 |         |         |         |         |         |         |         |         |         |
| 6             | XO+LPS   | 101.142200  | 39.635700   | 93.232790  | 58.877840  |         |         |         |         |         |         |         |         |         |
| 7             | Title    |             |             |            |            |         |         |         |         |         |         |         |         |         |
| 8             | Title    |             |             |            |            |         |         |         |         |         |         |         |         |         |
| 9             | Title    |             |             |            |            |         |         |         |         |         |         |         |         |         |
| 10            | Title    |             |             |            |            |         |         |         |         |         |         |         |         |         |
| 11            | Title    |             |             |            |            |         |         |         |         |         |         |         |         |         |
| 12            | Title    |             |             |            |            |         |         |         |         |         |         |         |         |         |
| 13            | Title    |             |             |            |            |         |         |         |         |         |         |         |         |         |
| 14            | Title    |             |             |            |            |         |         |         |         |         |         |         |         |         |
| 15            | Title    |             |             |            |            |         |         |         |         |         |         |         |         |         |
| 16            | Title    |             |             |            |            |         |         |         |         |         |         |         |         |         |
| 17            | Title    |             |             |            |            |         |         |         |         |         |         |         |         |         |
| 18            | Title    |             |             |            |            |         |         |         |         |         |         |         |         |         |
| 19            | Title    |             |             |            |            |         |         |         |         |         |         |         |         |         |
| 20            | Title    |             |             |            |            |         |         |         |         |         |         |         |         |         |
| 21            | Title    |             |             |            |            |         |         |         |         |         |         |         |         |         |
| 22            | Title    |             |             |            |            |         |         |         |         |         |         |         |         |         |
| 23            | Title    |             |             |            |            |         |         |         |         |         |         |         |         |         |
| 24            | Title    |             |             |            |            |         |         |         |         |         |         |         |         |         |
| 25            | Title    |             |             |            |            |         |         |         |         |         |         |         |         |         |
| 26            | Title    |             |             |            |            |         |         |         |         |         |         |         |         |         |
| 27            | Title    |             |             |            |            |         |         |         |         |         |         |         |         |         |
| 28            | Title    |             |             |            |            |         |         |         |         |         |         |         |         |         |
| 29            | Title    |             |             |            |            |         |         |         |         |         |         |         |         |         |
| 30            | Title    |             |             |            |            |         |         |         |         |         |         |         |         |         |
| 31            | Title    |             |             |            |            |         |         |         |         |         |         |         |         |         |
| 32            | Title    |             |             |            |            |         |         |         |         |         |         |         |         |         |
| 33            | Title    |             |             |            |            |         |         |         |         |         |         |         |         |         |
| 34            | Title    |             |             |            |            |         |         |         |         |         |         |         |         |         |

IL8

Row 16, B: Donor 2

SourceDataforFigure5C — Edited

Prism 8

File Sheet Undo Clipboard Analysis Change Import Draw Write Text Export Print Send LA Help

Search

▼ Data Tables

- IL8
- IL8 line**
- CCL5
- CCL5 line
- CXCL9
- CXCL9 line
- CCL2
- CCL2 line
- New Data Table...

▼ Info

- Project info 1
- Project info 1
- New Info...

▼ Results

- Transpose of IL8
- Col Stats of IL8
- Transform of Transpose of IL8

Family

- IL8 line**
- IL8 line

| Table format: |         | Group A     | Group B     | Group C    | Group D    | Group E | Group F | Group G | Group H | Group I | Group J | Group K | Group L | Group M |
|---------------|---------|-------------|-------------|------------|------------|---------|---------|---------|---------|---------|---------|---------|---------|---------|
| Grouped       |         | Donor 1     | Donor 2     | Donor 3    | Donor 4    | Title   | Title   | Title   | Title   | Title   | Title   | Title   | Title   | Title   |
| 1             | XO+RBCL | 55.886070   | 45.980950   | 63.665700  | 35.787290  |         | Y       | Y       | Y       | Y       | Y       | Y       | Y       | Y       |
| 2             | XO+RBCL | 1024.125000 | 3490.260000 | 399.502500 | 568.797500 |         |         |         |         |         |         |         |         |         |
| 3             | Title   |             |             |            |            |         |         |         |         |         |         |         |         |         |
| 4             |         |             |             |            |            |         |         |         |         |         |         |         |         |         |
| 5             | Title   |             |             |            |            |         |         |         |         |         |         |         |         |         |
| 6             | Title   |             |             |            |            |         |         |         |         |         |         |         |         |         |
| 7             | Title   |             |             |            |            |         |         |         |         |         |         |         |         |         |
| 8             | Title   |             |             |            |            |         |         |         |         |         |         |         |         |         |
| 9             | Title   |             |             |            |            |         |         |         |         |         |         |         |         |         |
| 10            | Title   |             |             |            |            |         |         |         |         |         |         |         |         |         |
| 11            | Title   |             |             |            |            |         |         |         |         |         |         |         |         |         |
| 12            | Title   |             |             |            |            |         |         |         |         |         |         |         |         |         |
| 13            | Title   |             |             |            |            |         |         |         |         |         |         |         |         |         |
| 14            | Title   |             |             |            |            |         |         |         |         |         |         |         |         |         |
| 15            | Title   |             |             |            |            |         |         |         |         |         |         |         |         |         |
| 16            | Title   |             |             |            |            |         |         |         |         |         |         |         |         |         |
| 17            | Title   |             |             |            |            |         |         |         |         |         |         |         |         |         |
| 18            | Title   |             |             |            |            |         |         |         |         |         |         |         |         |         |
| 19            | Title   |             |             |            |            |         |         |         |         |         |         |         |         |         |
| 20            | Title   |             |             |            |            |         |         |         |         |         |         |         |         |         |
| 21            | Title   |             |             |            |            |         |         |         |         |         |         |         |         |         |
| 22            | Title   |             |             |            |            |         |         |         |         |         |         |         |         |         |
| 23            | Title   |             |             |            |            |         |         |         |         |         |         |         |         |         |
| 24            | Title   |             |             |            |            |         |         |         |         |         |         |         |         |         |
| 25            | Title   |             |             |            |            |         |         |         |         |         |         |         |         |         |
| 26            | Title   |             |             |            |            |         |         |         |         |         |         |         |         |         |
| 27            | Title   |             |             |            |            |         |         |         |         |         |         |         |         |         |
| 28            | Title   |             |             |            |            |         |         |         |         |         |         |         |         |         |
| 29            | Title   |             |             |            |            |         |         |         |         |         |         |         |         |         |
| 30            | Title   |             |             |            |            |         |         |         |         |         |         |         |         |         |
| 31            | Title   |             |             |            |            |         |         |         |         |         |         |         |         |         |
| 32            | Title   |             |             |            |            |         |         |         |         |         |         |         |         |         |
| 33            | Title   |             |             |            |            |         |         |         |         |         |         |         |         |         |
| 34            | Title   |             |             |            |            |         |         |         |         |         |         |         |         |         |

IL8 line

Row 4, Column RT

SourceDataforFigure5C — Edited

Prism 8

File Sheet Undo Clipboard Analysis Change Import Draw Write Text Export Print Send LA Help

Search

▼ Data Tables

- IL8
- IL8 line
- CCL5**
- CCL5 line
- CXCL9
- CXCL9 line
- CCL2
- CCL2 line
- New Data Table...

▼ Info

- Project info 1
- Project info 1
- New Info...

▼ Results

- Transpose of IL8
- Col Stats of IL8
- Transform of Transpose of IL8

Family

- CCL5**
  - Transpose
    - Col Stats
    - Transform
      - Mann-Whitney test
      - Ordinary one-way ANOVA
- CCL5

| Table format: |          | Group A    | Group B    | Group C    | Group D    | Group E | Group F | Group G | Group H | Group I | Group J | Group K | Group L | Group M |
|---------------|----------|------------|------------|------------|------------|---------|---------|---------|---------|---------|---------|---------|---------|---------|
| Grouped       |          | Donor 1    | Donor 2    | Donor 3    | Donor 4    | Title   | Title   | Title   | Title   | Title   | Title   | Title   | Title   | Title   |
|               |          | Y          | Y          | Y          | Y          | Y       | Y       | Y       | Y       | Y       | Y       | Y       | Y       | Y       |
| 1             | RBCL     | 0.9187548  | 0.7247817  | 0.8148176  | 1.2578040  |         |         |         |         |         |         |         |         |         |
| 2             | iRBCL    | 0.8499114  | 0.5917513  | 1.0984580  | 0.6711362  |         |         |         |         |         |         |         |         |         |
| 3             | LPS      | 2.3394080  | 3.1670330  | 0.7794660  | 0.7956680  |         |         |         |         |         |         |         |         |         |
| 4             | XO+RBCL  | 1.9857000  | 2.7948460  | 0.8148176  | 0.6283590  |         |         |         |         |         |         |         |         |         |
| 5             | XO+iRBCL | 54.3725000 | 93.7550000 | 21.6450000 | 56.1225000 |         |         |         |         |         |         |         |         |         |
| 6             | XO+LPS   | 2.6947610  | 2.9239720  | 0.7969914  | 0.9313827  |         |         |         |         |         |         |         |         |         |
| 7             | Title    |            |            |            |            |         |         |         |         |         |         |         |         |         |
| 8             | Title    |            |            |            |            |         |         |         |         |         |         |         |         |         |
| 9             | Title    |            |            |            |            |         |         |         |         |         |         |         |         |         |
| 10            | Title    |            |            |            |            |         |         |         |         |         |         |         |         |         |
| 11            | Title    |            |            |            |            |         |         |         |         |         |         |         |         |         |
| 12            | Title    |            |            |            |            |         |         |         |         |         |         |         |         |         |
| 13            | Title    |            |            |            |            |         |         |         |         |         |         |         |         |         |
| 14            | Title    |            |            |            |            |         |         |         |         |         |         |         |         |         |
| 15            | Title    |            |            |            |            |         |         |         |         |         |         |         |         |         |
| 16            | Title    |            |            |            |            |         |         |         |         |         |         |         |         |         |
| 17            | Title    |            |            |            |            |         |         |         |         |         |         |         |         |         |
| 18            | Title    |            |            |            |            |         |         |         |         |         |         |         |         |         |
| 19            | Title    |            |            |            |            |         |         |         |         |         |         |         |         |         |
| 20            | Title    |            |            |            |            |         |         |         |         |         |         |         |         |         |
| 21            | Title    |            |            |            |            |         |         |         |         |         |         |         |         |         |
| 22            | Title    |            |            |            |            |         |         |         |         |         |         |         |         |         |
| 23            | Title    |            |            |            |            |         |         |         |         |         |         |         |         |         |
| 24            | Title    |            |            |            |            |         |         |         |         |         |         |         |         |         |
| 25            | Title    |            |            |            |            |         |         |         |         |         |         |         |         |         |
| 26            | Title    |            |            |            |            |         |         |         |         |         |         |         |         |         |
| 27            | Title    |            |            |            |            |         |         |         |         |         |         |         |         |         |
| 28            | Title    |            |            |            |            |         |         |         |         |         |         |         |         |         |
| 29            | Title    |            |            |            |            |         |         |         |         |         |         |         |         |         |
| 30            | Title    |            |            |            |            |         |         |         |         |         |         |         |         |         |
| 31            | Title    |            |            |            |            |         |         |         |         |         |         |         |         |         |
| 32            | Title    |            |            |            |            |         |         |         |         |         |         |         |         |         |
| 33            | Title    |            |            |            |            |         |         |         |         |         |         |         |         |         |
| 34            | Title    |            |            |            |            |         |         |         |         |         |         |         |         |         |

CCL5 Row --, Column --

SourceDataforFigure5C — Edited

Prism 8

File Sheet Undo Clipboard Analysis Change Import Draw Write Text Export Print Send LA Help

11 Arial

Search

▼ Data Tables

- IL8
- IL8 line
- CCL5
- CCL5 line**
- CXCL9
- CXCL9 line
- CCL2
- CCL2 line
- New Data Table...

▼ Info

- Project info 1
- Project info 1
- New Info...

▼ Results

- Transpose of IL8
- Col Stats of IL8
- Transform of Transpose of IL8

Family

- CCL5 line**
- CCL5 line

| Table format: |         | Group A    | Group B    | Group C    | Group D    | Group E | Group F | Group G | Group H | Group I | Group J | Group K | Group L | Group M |
|---------------|---------|------------|------------|------------|------------|---------|---------|---------|---------|---------|---------|---------|---------|---------|
| Grouped       |         | Donor 1    | Donor 2    | Donor 3    | Donor 4    | Title   | Title   | Title   | Title   | Title   | Title   | Title   | Title   | Title   |
|               | Y       | Y          | Y          | Y          | Y          | Y       | Y       | Y       | Y       | Y       | Y       | Y       | Y       | Y       |
| 1             | XO+RBCL | 1.9857000  | 2.7948460  | 0.8148176  | 0.6283590  |         |         |         |         |         |         |         |         |         |
| 2             | XO+RBCL | 54.3725000 | 93.7550000 | 21.6450000 | 56.1225000 |         |         |         |         |         |         |         |         |         |
| 3             | Title   |            |            |            |            |         |         |         |         |         |         |         |         |         |
| 4             | Title   |            |            |            |            |         |         |         |         |         |         |         |         |         |
| 5             | Title   |            |            |            |            |         |         |         |         |         |         |         |         |         |
| 6             | Title   |            |            |            |            |         |         |         |         |         |         |         |         |         |
| 7             | Title   |            |            |            |            |         |         |         |         |         |         |         |         |         |
| 8             | Title   |            |            |            |            |         |         |         |         |         |         |         |         |         |
| 9             | Title   |            |            |            |            |         |         |         |         |         |         |         |         |         |
| 10            | Title   |            |            |            |            |         |         |         |         |         |         |         |         |         |
| 11            | Title   |            |            |            |            |         |         |         |         |         |         |         |         |         |
| 12            | Title   |            |            |            |            |         |         |         |         |         |         |         |         |         |
| 13            | Title   |            |            |            |            |         |         |         |         |         |         |         |         |         |
| 14            | Title   |            |            |            |            |         |         |         |         |         |         |         |         |         |
| 15            | Title   |            |            |            |            |         |         |         |         |         |         |         |         |         |
| 16            | Title   |            |            |            |            |         |         |         |         |         |         |         |         |         |
| 17            | Title   |            |            |            |            |         |         |         |         |         |         |         |         |         |
| 18            | Title   |            |            |            |            |         |         |         |         |         |         |         |         |         |
| 19            | Title   |            |            |            |            |         |         |         |         |         |         |         |         |         |
| 20            | Title   |            |            |            |            |         |         |         |         |         |         |         |         |         |
| 21            | Title   |            |            |            |            |         |         |         |         |         |         |         |         |         |
| 22            | Title   |            |            |            |            |         |         |         |         |         |         |         |         |         |
| 23            | Title   |            |            |            |            |         |         |         |         |         |         |         |         |         |
| 24            | Title   |            |            |            |            |         |         |         |         |         |         |         |         |         |
| 25            | Title   |            |            |            |            |         |         |         |         |         |         |         |         |         |
| 26            | Title   |            |            |            |            |         |         |         |         |         |         |         |         |         |
| 27            | Title   |            |            |            |            |         |         |         |         |         |         |         |         |         |
| 28            | Title   |            |            |            |            |         |         |         |         |         |         |         |         |         |
| 29            | Title   |            |            |            |            |         |         |         |         |         |         |         |         |         |
| 30            | Title   |            |            |            |            |         |         |         |         |         |         |         |         |         |
| 31            | Title   |            |            |            |            |         |         |         |         |         |         |         |         |         |
| 32            | Title   |            |            |            |            |         |         |         |         |         |         |         |         |         |
| 33            | Title   |            |            |            |            |         |         |         |         |         |         |         |         |         |
| 34            | Title   |            |            |            |            |         |         |         |         |         |         |         |         |         |

Row --, Column --, Selected: Rows 0, Columns 1

SourceDataforFigure5C — Edited

File Sheet Undo Clipboard Analysis Change Import Draw Write Text Export Print Send LA Help

Prism 8

Search

▼ Data Tables

- IL8
- IL8 line
- CCL5
- CCL5 line
- CXCL9**
- CXCL9 line
- CCL2
- CCL2 line
- New Data Table...

▼ Info

- Project info 1
- Project info 1
- New Info...

▼ Results

- Transpose of IL8
- Col Stats of IL8
- Transform of Transpose of IL8

Family

- CXCL9**
  - Transpose
    - Col Stats
    - Transform
      - Mann-Whitney test
      - Ordinary one-way ANOVA
  - CXCL9

| Table format: |          | Group A    | Group B     | Group C  | Group D   | Group E | Group F | Group G | Group H | Group I | Group J | Group K | Group L | Group M |
|---------------|----------|------------|-------------|----------|-----------|---------|---------|---------|---------|---------|---------|---------|---------|---------|
| Grouped       |          | Donor 1    | Donor 2     | Donor 3  | Donor 4   | Title   | Title   | Title   | Title   | Title   | Title   | Title   | Title   | Title   |
| Y             |          | Y          | Y           | Y        | Y         | Y       | Y       | Y       | Y       | Y       | Y       | Y       | Y       | Y       |
| 1             | RBCL     | 0.6887328  | 0.6342506   | 1.092105 | 4.389092  |         |         |         |         |         |         |         |         |         |
| 2             | iRBCL    | 0.7949203  | 0.8382853   | 2.275960 | 1.021284  |         |         |         |         |         |         |         |         |         |
| 3             | LPS      | 10.4806800 | 92.4909500  | 8.426387 | 15.415360 |         |         |         |         |         |         |         |         |         |
| 4             | XO+RBCL  | 8.3382870  | 39.8493600  | 0.953414 | 4.437978  |         |         |         |         |         |         |         |         |         |
| 5             | XO+iRBCL | 37.7225000 | 455.1225000 | 1.890000 | 86.227500 |         |         |         |         |         |         |         |         |         |
| 6             | XO+LPS   | 18.3423400 | 46.5446800  | 9.796586 | 12.024280 |         |         |         |         |         |         |         |         |         |
| 7             | Title    |            |             |          |           |         |         |         |         |         |         |         |         |         |
| 8             | Title    |            |             |          |           |         |         |         |         |         |         |         |         |         |
| 9             | Title    |            |             |          |           |         |         |         |         |         |         |         |         |         |
| 10            | Title    |            |             |          |           |         |         |         |         |         |         |         |         |         |
| 11            | Title    |            |             |          |           |         |         |         |         |         |         |         |         |         |
| 12            | Title    |            |             |          |           |         |         |         |         |         |         |         |         |         |
| 13            | Title    |            |             |          |           |         |         |         |         |         |         |         |         |         |
| 14            | Title    |            |             |          |           |         |         |         |         |         |         |         |         |         |
| 15            | Title    |            |             |          |           |         |         |         |         |         |         |         |         |         |
| 16            | Title    |            |             |          |           |         |         |         |         |         |         |         |         |         |
| 17            | Title    |            |             |          |           |         |         |         |         |         |         |         |         |         |
| 18            | Title    |            |             |          |           |         |         |         |         |         |         |         |         |         |
| 19            | Title    |            |             |          |           |         |         |         |         |         |         |         |         |         |
| 20            | Title    |            |             |          |           |         |         |         |         |         |         |         |         |         |
| 21            | Title    |            |             |          |           |         |         |         |         |         |         |         |         |         |
| 22            | Title    |            |             |          |           |         |         |         |         |         |         |         |         |         |
| 23            | Title    |            |             |          |           |         |         |         |         |         |         |         |         |         |
| 24            | Title    |            |             |          |           |         |         |         |         |         |         |         |         |         |
| 25            | Title    |            |             |          |           |         |         |         |         |         |         |         |         |         |
| 26            | Title    |            |             |          |           |         |         |         |         |         |         |         |         |         |
| 27            | Title    |            |             |          |           |         |         |         |         |         |         |         |         |         |
| 28            | Title    |            |             |          |           |         |         |         |         |         |         |         |         |         |
| 29            | Title    |            |             |          |           |         |         |         |         |         |         |         |         |         |
| 30            | Title    |            |             |          |           |         |         |         |         |         |         |         |         |         |
| 31            | Title    |            |             |          |           |         |         |         |         |         |         |         |         |         |
| 32            | Title    |            |             |          |           |         |         |         |         |         |         |         |         |         |
| 33            | Title    |            |             |          |           |         |         |         |         |         |         |         |         |         |
| 34            | Title    |            |             |          |           |         |         |         |         |         |         |         |         |         |

Row --, Column --, Selected: Rows 0, Columns 1

SourceDataforFigure5C — Edited

File Sheet Undo Clipboard Analysis Change Import Draw Write Text Export Print Send LA Help

Prism 8

Search

▼ Data Tables

- IL8
- IL8 line
- CCL5
- CCL5 line
- CXCL9
- CXCL9 line**
- CCL2
- CCL2 line
- + New Data Table...

▼ Info

- Project info 1
- Project info 1
- + New Info...

▼ Results

- Transpose of IL8
- Col Stats of IL8
- Transform of Transpose of IL8

Family

- CXCL9 line**
- CXCL9 line

| Table format: |         | Group A    | Group B     | Group C  | Group D   | Group E | Group F | Group G | Group H | Group I | Group J | Group K | Group L | Group M |
|---------------|---------|------------|-------------|----------|-----------|---------|---------|---------|---------|---------|---------|---------|---------|---------|
| Grouped       |         | Donor 1    | Donor 2     | Donor 3  | Donor 4   | Title   | Title   | Title   | Title   | Title   | Title   | Title   | Title   | Title   |
|               | Y       | Y          | Y           | Y        | Y         | Y       | Y       | Y       | Y       | Y       | Y       | Y       | Y       | Y       |
| 1             | XO+RBCL | 8.3382870  | 39.8493600  | 0.953414 | 4.437978  |         |         |         |         |         |         |         |         |         |
| 2             | XO+RBCL | 37.7225000 | 455.1225000 | 1.890000 | 86.227500 |         |         |         |         |         |         |         |         |         |
| 3             | Title   |            |             |          |           |         |         |         |         |         |         |         |         |         |
| 4             | Title   |            |             |          |           |         |         |         |         |         |         |         |         |         |
| 5             | Title   |            |             |          |           |         |         |         |         |         |         |         |         |         |
| 6             | Title   |            |             |          |           |         |         |         |         |         |         |         |         |         |
| 7             | Title   |            |             |          |           |         |         |         |         |         |         |         |         |         |
| 8             | Title   |            |             |          |           |         |         |         |         |         |         |         |         |         |
| 9             | Title   |            |             |          |           |         |         |         |         |         |         |         |         |         |
| 10            | Title   |            |             |          |           |         |         |         |         |         |         |         |         |         |
| 11            | Title   |            |             |          |           |         |         |         |         |         |         |         |         |         |
| 12            | Title   |            |             |          |           |         |         |         |         |         |         |         |         |         |
| 13            | Title   |            |             |          |           |         |         |         |         |         |         |         |         |         |
| 14            | Title   |            |             |          |           |         |         |         |         |         |         |         |         |         |
| 15            | Title   |            |             |          |           |         |         |         |         |         |         |         |         |         |
| 16            | Title   |            |             |          |           |         |         |         |         |         |         |         |         |         |
| 17            | Title   |            |             |          |           |         |         |         |         |         |         |         |         |         |
| 18            | Title   |            |             |          |           |         |         |         |         |         |         |         |         |         |
| 19            | Title   |            |             |          |           |         |         |         |         |         |         |         |         |         |
| 20            | Title   |            |             |          |           |         |         |         |         |         |         |         |         |         |
| 21            | Title   |            |             |          |           |         |         |         |         |         |         |         |         |         |
| 22            | Title   |            |             |          |           |         |         |         |         |         |         |         |         |         |
| 23            | Title   |            |             |          |           |         |         |         |         |         |         |         |         |         |
| 24            | Title   |            |             |          |           |         |         |         |         |         |         |         |         |         |
| 25            | Title   |            |             |          |           |         |         |         |         |         |         |         |         |         |
| 26            | Title   |            |             |          |           |         |         |         |         |         |         |         |         |         |
| 27            | Title   |            |             |          |           |         |         |         |         |         |         |         |         |         |
| 28            | Title   |            |             |          |           |         |         |         |         |         |         |         |         |         |
| 29            | Title   |            |             |          |           |         |         |         |         |         |         |         |         |         |
| 30            | Title   |            |             |          |           |         |         |         |         |         |         |         |         |         |
| 31            | Title   |            |             |          |           |         |         |         |         |         |         |         |         |         |
| 32            | Title   |            |             |          |           |         |         |         |         |         |         |         |         |         |
| 33            | Title   |            |             |          |           |         |         |         |         |         |         |         |         |         |
| 34            | Title   |            |             |          |           |         |         |         |         |         |         |         |         |         |

CXCL9 line

Row --, Column --, Selected: Rows 0, Columns 1



SourceDataforFigure5C — Edited

File Sheet Undo Clipboard Analysis Change Import Draw Write Text Export Print Send LA Help

Prism 8

Search

▼ Data Tables

- IL8
- IL8 line
- CCL5
- CCL5 line
- CXCL9
- CXCL9 line
- CCL2**
- CCL2 line
- New Data Table...

▼ Info

- Project info 1
- Project info 1
- New Info...

▼ Results

- Transpose of IL8
- Col Stats of IL8
- Transform of Transpose of IL8

Family

- CCL2**
  - Transpose
    - Col Stats
    - Transform
      - Mann-Whitney test
      - Ordinary one-way ANOVA
- CCL2

|    | Table format:<br>Grouped | Group A    | Group B    | Group C    | Group D    | Group E | Group F | Group G | Group H | Group I | Group J | Group K | Group L | Group M |
|----|--------------------------|------------|------------|------------|------------|---------|---------|---------|---------|---------|---------|---------|---------|---------|
|    |                          | Donor 1    | Donor 2    | Donor 3    | Donor 4    | Title   | Title   | Title   | Title   | Title   | Title   | Title   | Title   | Title   |
|    |                          | Y          | Y          | Y          | Y          | Y       | Y       | Y       | Y       | Y       | Y       | Y       | Y       | Y       |
| 1  | RBCL                     | 1.078116   | 3.304261   | 0.9106138  | 2.403658   |         |         |         |         |         |         |         |         |         |
| 2  | iRBCL                    | 3.002600   | 7.001407   | 4.2781820  | 2.323692   |         |         |         |         |         |         |         |         |         |
| 3  | LPS                      | 3.920284   | 7.819363   | 1.5309630  | 3.688431   |         |         |         |         |         |         |         |         |         |
| 4  | XO+RBCL                  | 5.864973   | 14.456020  | 3.4418510  | 4.516589   |         |         |         |         |         |         |         |         |         |
| 5  | XO+iRBCL                 | 230.157500 | 564.680000 | 59.6150000 | 106.227500 |         |         |         |         |         |         |         |         |         |
| 6  | XO+LPS                   | 5.472895   | 7.819363   | 1.9949200  | 3.275627   |         |         |         |         |         |         |         |         |         |
| 7  | Title                    |            |            |            |            |         |         |         |         |         |         |         |         |         |
| 8  | Title                    |            |            |            |            |         |         |         |         |         |         |         |         |         |
| 9  | Title                    |            |            |            |            |         |         |         |         |         |         |         |         |         |
| 10 | Title                    |            |            |            |            |         |         |         |         |         |         |         |         |         |
| 11 | Title                    |            |            |            |            |         |         |         |         |         |         |         |         |         |
| 12 | Title                    |            |            |            |            |         |         |         |         |         |         |         |         |         |
| 13 | Title                    |            |            |            |            |         |         |         |         |         |         |         |         |         |
| 14 | Title                    |            |            |            |            |         |         |         |         |         |         |         |         |         |
| 15 | Title                    |            |            |            |            |         |         |         |         |         |         |         |         |         |
| 16 | Title                    |            |            |            |            |         |         |         |         |         |         |         |         |         |
| 17 | Title                    |            |            |            |            |         |         |         |         |         |         |         |         |         |
| 18 | Title                    |            |            |            |            |         |         |         |         |         |         |         |         |         |
| 19 | Title                    |            |            |            |            |         |         |         |         |         |         |         |         |         |
| 20 | Title                    |            |            |            |            |         |         |         |         |         |         |         |         |         |
| 21 | Title                    |            |            |            |            |         |         |         |         |         |         |         |         |         |
| 22 | Title                    |            |            |            |            |         |         |         |         |         |         |         |         |         |
| 23 | Title                    |            |            |            |            |         |         |         |         |         |         |         |         |         |
| 24 | Title                    |            |            |            |            |         |         |         |         |         |         |         |         |         |
| 25 | Title                    |            |            |            |            |         |         |         |         |         |         |         |         |         |
| 26 | Title                    |            |            |            |            |         |         |         |         |         |         |         |         |         |
| 27 | Title                    |            |            |            |            |         |         |         |         |         |         |         |         |         |
| 28 | Title                    |            |            |            |            |         |         |         |         |         |         |         |         |         |
| 29 | Title                    |            |            |            |            |         |         |         |         |         |         |         |         |         |
| 30 | Title                    |            |            |            |            |         |         |         |         |         |         |         |         |         |
| 31 | Title                    |            |            |            |            |         |         |         |         |         |         |         |         |         |
| 32 | Title                    |            |            |            |            |         |         |         |         |         |         |         |         |         |
| 33 | Title                    |            |            |            |            |         |         |         |         |         |         |         |         |         |
| 34 | Title                    |            |            |            |            |         |         |         |         |         |         |         |         |         |

Row --, Column --, Selected: Rows 0, Columns 1

SourceDataforFigure5C — Edited

File Sheet Undo Clipboard Analysis Change Import Draw Write Text Export Print Send LA Help

Prism 8

Search

▼ Data Tables

- IL8
- IL8 line
- CCL5
- CCL5 line
- CXCL9
- CXCL9 line
- CCL2
- CCL2 line**
- + New Data Table...

▼ Info

- Project info 1
- Project info 1
- + New Info...

▼ Results

- Transpose of IL8
- Col Stats of IL8
- Transform of Transpose of IL8

Family

- CCL2 line**
- CCL2 line

| Table format: |         | Group A    | Group B    | Group C    | Group D    | Group E | Group F | Group G | Group H | Group I | Group J | Group K | Group L | Group M |
|---------------|---------|------------|------------|------------|------------|---------|---------|---------|---------|---------|---------|---------|---------|---------|
| Grouped       |         | Donor 1    | Donor 2    | Donor 3    | Donor 4    | Title   | Title   | Title   | Title   | Title   | Title   | Title   | Title   | Title   |
| 1             | XO+RBCL | 5.864973   | 14.456020  | 3.4418510  | 4.516589   | Y       | Y       | Y       | Y       | Y       | Y       | Y       | Y       | Y       |
| 2             | XO+RBCL | 230.157500 | 564.680000 | 59.6150000 | 106.227500 |         |         |         |         |         |         |         |         |         |
| 3             | Title   |            |            |            |            |         |         |         |         |         |         |         |         |         |
| 4             | Title   |            |            |            |            |         |         |         |         |         |         |         |         |         |
| 5             | Title   |            |            |            |            |         |         |         |         |         |         |         |         |         |
| 6             | Title   |            |            |            |            |         |         |         |         |         |         |         |         |         |
| 7             | Title   |            |            |            |            |         |         |         |         |         |         |         |         |         |
| 8             | Title   |            |            |            |            |         |         |         |         |         |         |         |         |         |
| 9             | Title   |            |            |            |            |         |         |         |         |         |         |         |         |         |
| 10            | Title   |            |            |            |            |         |         |         |         |         |         |         |         |         |
| 11            | Title   |            |            |            |            |         |         |         |         |         |         |         |         |         |
| 12            | Title   |            |            |            |            |         |         |         |         |         |         |         |         |         |
| 13            | Title   |            |            |            |            |         |         |         |         |         |         |         |         |         |
| 14            | Title   |            |            |            |            |         |         |         |         |         |         |         |         |         |
| 15            | Title   |            |            |            |            |         |         |         |         |         |         |         |         |         |
| 16            | Title   |            |            |            |            |         |         |         |         |         |         |         |         |         |
| 17            | Title   |            |            |            |            |         |         |         |         |         |         |         |         |         |
| 18            | Title   |            |            |            |            |         |         |         |         |         |         |         |         |         |
| 19            | Title   |            |            |            |            |         |         |         |         |         |         |         |         |         |
| 20            | Title   |            |            |            |            |         |         |         |         |         |         |         |         |         |
| 21            | Title   |            |            |            |            |         |         |         |         |         |         |         |         |         |
| 22            | Title   |            |            |            |            |         |         |         |         |         |         |         |         |         |
| 23            | Title   |            |            |            |            |         |         |         |         |         |         |         |         |         |
| 24            | Title   |            |            |            |            |         |         |         |         |         |         |         |         |         |
| 25            | Title   |            |            |            |            |         |         |         |         |         |         |         |         |         |
| 26            | Title   |            |            |            |            |         |         |         |         |         |         |         |         |         |
| 27            | Title   |            |            |            |            |         |         |         |         |         |         |         |         |         |
| 28            | Title   |            |            |            |            |         |         |         |         |         |         |         |         |         |
| 29            | Title   |            |            |            |            |         |         |         |         |         |         |         |         |         |
| 30            | Title   |            |            |            |            |         |         |         |         |         |         |         |         |         |
| 31            | Title   |            |            |            |            |         |         |         |         |         |         |         |         |         |
| 32            | Title   |            |            |            |            |         |         |         |         |         |         |         |         |         |
| 33            | Title   |            |            |            |            |         |         |         |         |         |         |         |         |         |
| 34            | Title   |            |            |            |            |         |         |         |         |         |         |         |         |         |

CCL2 line

Row --, Column --, Selected: Rows 0, Columns 1

SourceDataforFigure5C — Edited

Prism 8

File Sheet Undo Clipboard Analysis Interpret Change Draw Write Text Export Print Send LA Help

Search

▼ Info

- Project info 1
- Project info 1
- New Info...

▼ Results

- Transpose of IL8**
- Col Stats of IL8
- Transform of Transpose of IL8
- Mann-Whitney test of Transform of Transpose of IL8
- Ordinary one-way ANOVA of Transpose of IL8
- Transpose of CCL5
- Col Stats of Transpose of CCL5
- Transform of Transpose of CCL5
- Mann-Whitney test of Transform of Transpose of CCL5
- Ordinary one-way ANOVA of Transform of Transpose of CC
- Transpose of CXCL9
- Col Stats of Transpose of CXCL9
- Transform of Transpose of CXCL9

Family

- IL8
  - Transpose**
    - Transform
      - Mann-Whitney test
      - Ordinary one-way ANOVA

|    |         | A     | B      | C       | D       | E        | F       | G     | H     | I     | J     | K     | L     | M     |
|----|---------|-------|--------|---------|---------|----------|---------|-------|-------|-------|-------|-------|-------|-------|
|    |         | RBCL  | iRBCL  | LPS     | XO+RBCL | XO+iRBCL | XO+LPS  | Title | Title | Title | Title | Title | Title | Title |
|    |         | Y     | Y      | Y       | Y       | Y        | Y       | Y     | Y     | Y     | Y     | Y     | Y     | Y     |
| 1  | Donor 1 | 1.415 | 7.446  | 120.699 | 55.886  | 1024.125 | 101.142 |       |       |       |       |       |       |       |
| 2  | Donor 2 | 2.894 | 3.254  | 50.037  | 45.981  | 3490.260 | 39.636  |       |       |       |       |       |       |       |
| 3  | Donor 3 | 2.064 | 34.672 | 87.836  | 63.666  | 399.503  | 93.233  |       |       |       |       |       |       |       |
| 4  | Donor 4 | 3.476 | 5.947  | 62.060  | 35.787  | 568.798  | 58.878  |       |       |       |       |       |       |       |
| 5  |         |       |        |         |         |          |         |       |       |       |       |       |       |       |
| 6  |         |       |        |         |         |          |         |       |       |       |       |       |       |       |
| 7  |         |       |        |         |         |          |         |       |       |       |       |       |       |       |
| 8  |         |       |        |         |         |          |         |       |       |       |       |       |       |       |
| 9  |         |       |        |         |         |          |         |       |       |       |       |       |       |       |
| 10 |         |       |        |         |         |          |         |       |       |       |       |       |       |       |
| 11 |         |       |        |         |         |          |         |       |       |       |       |       |       |       |
| 12 |         |       |        |         |         |          |         |       |       |       |       |       |       |       |
| 13 |         |       |        |         |         |          |         |       |       |       |       |       |       |       |
| 14 |         |       |        |         |         |          |         |       |       |       |       |       |       |       |
| 15 |         |       |        |         |         |          |         |       |       |       |       |       |       |       |
| 16 |         |       |        |         |         |          |         |       |       |       |       |       |       |       |
| 17 |         |       |        |         |         |          |         |       |       |       |       |       |       |       |
| 18 |         |       |        |         |         |          |         |       |       |       |       |       |       |       |
| 19 |         |       |        |         |         |          |         |       |       |       |       |       |       |       |
| 20 |         |       |        |         |         |          |         |       |       |       |       |       |       |       |
| 21 |         |       |        |         |         |          |         |       |       |       |       |       |       |       |
| 22 |         |       |        |         |         |          |         |       |       |       |       |       |       |       |
| 23 |         |       |        |         |         |          |         |       |       |       |       |       |       |       |
| 24 |         |       |        |         |         |          |         |       |       |       |       |       |       |       |
| 25 |         |       |        |         |         |          |         |       |       |       |       |       |       |       |
| 26 |         |       |        |         |         |          |         |       |       |       |       |       |       |       |
| 27 |         |       |        |         |         |          |         |       |       |       |       |       |       |       |
| 28 |         |       |        |         |         |          |         |       |       |       |       |       |       |       |
| 29 |         |       |        |         |         |          |         |       |       |       |       |       |       |       |
| 30 |         |       |        |         |         |          |         |       |       |       |       |       |       |       |
| 31 |         |       |        |         |         |          |         |       |       |       |       |       |       |       |
| 32 |         |       |        |         |         |          |         |       |       |       |       |       |       |       |
| 33 |         |       |        |         |         |          |         |       |       |       |       |       |       |       |
| 34 |         |       |        |         |         |          |         |       |       |       |       |       |       |       |

Transpose of IL8 Row 1, A: RBCL

SourceDataforFigure5C — Edited

Prism 8

File Sheet Undo Clipboard Analysis Interpret Change Draw Write Text Export Print Send LA Help

11 Arial

Search

▼ Info

- Project info 1
- Project info 1
- New Info...

▼ Results

- Transpose of IL8
- Col Stats of IL8**
- Transform of Transpose of IL8
- Mann-Whitney test of Transform of Transpose of IL8
- Ordinary one-way ANOVA of Transpose of IL8
- Transpose of CCL5
- Col Stats of Transpose of CCL5
- Transform of Transpose of CCL5
- Mann-Whitney test of Transform of Transpose of CCL5
- Ordinary one-way ANOVA of Transform of Transpose of CC
- Transpose of CXCL9
- Col Stats of Transpose of CXCL9
- Transform of Transpose of CXCL9

Family

- IL8
- Col Stats**

| Col Stats |                                                | A           | B           | C           | D           | E     | F     | G     | H     | I     | J     | K     |
|-----------|------------------------------------------------|-------------|-------------|-------------|-------------|-------|-------|-------|-------|-------|-------|-------|
|           |                                                | Donor 1     | Donor 2     | Donor 3     | Donor 4     | Title | Title | Title | Title | Title | Title | Title |
| 1         | Number of values                               | 6           | 6           | 6           | 6           | Y     | Y     | Y     | Y     | Y     | Y     | Y     |
| 2         |                                                |             |             |             |             |       |       |       |       |       |       |       |
| 3         | Minimum                                        | 1.415       | 2.894       | 2.064       | 3.476       |       |       |       |       |       |       |       |
| 4         | 25% Percentile                                 | 5.938       | 3.164       | 26.52       | 5.329       |       |       |       |       |       |       |       |
| 5         | Median                                         | 78.51       | 42.81       | 75.75       | 47.33       |       |       |       |       |       |       |       |
| 6         | 75% Percentile                                 | 346.6       | 910.1       | 169.8       | 188.7       |       |       |       |       |       |       |       |
| 7         | Maximum                                        | 1024        | 3490        | 399.5       | 568.8       |       |       |       |       |       |       |       |
| 8         |                                                |             |             |             |             |       |       |       |       |       |       |       |
| 9         | Mean                                           | 218.5       | 605.3       | 113.5       | 122.5       |       |       |       |       |       |       |       |
| 10        | Std. Deviation                                 | 397.6       | 1413        | 144.2       | 220.1       |       |       |       |       |       |       |       |
| 11        | Std. Error of Mean                             | 162.3       | 577.0       | 58.87       | 89.84       |       |       |       |       |       |       |       |
| 12        |                                                |             |             |             |             |       |       |       |       |       |       |       |
| 13        | Lower 95% CI of mean                           | -198.8      | -878.0      | -37.84      | -108.5      |       |       |       |       |       |       |       |
| 14        | Upper 95% CI of mean                           | 635.7       | 2089        | 264.8       | 353.4       |       |       |       |       |       |       |       |
| 15        |                                                |             |             |             |             |       |       |       |       |       |       |       |
| 16        | Sum                                            | 1311        | 3632        | 681.0       | 734.9       |       |       |       |       |       |       |       |
| 17        |                                                |             |             |             |             |       |       |       |       |       |       |       |
| 18        | <b>D'Agostino &amp; Pearson normality test</b> |             |             |             |             |       |       |       |       |       |       |       |
| 19        | K2                                             | N too small | N too small | N too small | N too small |       |       |       |       |       |       |       |
| 20        | P value                                        |             |             |             |             |       |       |       |       |       |       |       |
| 21        | Passed normality test (alpha=0.05)?            |             |             |             |             |       |       |       |       |       |       |       |
| 22        | P value summary                                |             |             |             |             |       |       |       |       |       |       |       |
| 23        |                                                |             |             |             |             |       |       |       |       |       |       |       |
| 24        | <b>Shapiro-Wilk normality test</b>             |             |             |             |             |       |       |       |       |       |       |       |
| 25        | W                                              | 0.6082      | 0.5095      | 0.7226      | 0.6003      |       |       |       |       |       |       |       |
| 26        | P value                                        | 0.0006      | <0.0001     | 0.0106      | 0.0005      |       |       |       |       |       |       |       |
| 27        | Passed normality test (alpha=0.05)?            | No          | No          | No          | No          |       |       |       |       |       |       |       |
| 28        | P value summary                                | ***         | ****        | *           | ***         |       |       |       |       |       |       |       |
| 29        |                                                |             |             |             |             |       |       |       |       |       |       |       |
| 30        | <b>KS normality test</b>                       |             |             |             |             |       |       |       |       |       |       |       |
| 31        | KS distance                                    | 0.4304      | 0.4861      | 0.3892      | 0.4415      |       |       |       |       |       |       |       |
| 32        | P value                                        | 0.0009      | <0.0001     | 0.0049      | 0.0005      |       |       |       |       |       |       |       |
| 33        | Passed normality test (alpha=0.05)?            | No          | No          | No          | No          |       |       |       |       |       |       |       |
| 34        | P value summary                                | ***         | ****        | **          | ***         |       |       |       |       |       |       |       |

Col Stats of IL8

Row 1, A: Donor 1

SourceDataforFigure5C — Edited

File Sheet Undo Clipboard Analysis Interpret Change Draw Write Text Export Print Send LA Help

Prism 8

Search

▼ Info

- Project info 1
- Project info 1
- New Info...

▼ Results

- Transpose of IL8
- Col Stats of IL8
- Transform of Transpose of IL8**
- Mann-Whitney test of Transform of Transpose of IL8
- Ordinary one-way ANOVA of Transpose of IL8
- Transpose of CCL5
- Col Stats of Transpose of CCL5
- Transform of Transpose of CCL5
- Mann-Whitney test of Transform of Transpose of CCL5
- Ordinary one-way ANOVA of Transform of Transpose of CC
- Transpose of CXCL9
- Col Stats of Transpose of CXCL9
- Transform of Transpose of CXCL9

Family

- IL8
  - Transpose
    - Transform**
    - Mann-Whitney test

|    |         | A     | B     | C     | D       | E        | F      | G     | H     | I     | J     | K     | L     | M     |
|----|---------|-------|-------|-------|---------|----------|--------|-------|-------|-------|-------|-------|-------|-------|
|    |         | RBCL  | iRBCL | LPS   | XO+RBCL | XO+iRBCL | XO+LPS | Title | Title | Title | Title | Title | Title | Title |
|    |         | Y     | Y     | Y     | Y       | Y        | Y      | Y     | Y     | Y     | Y     | Y     | Y     | Y     |
| 1  | Donor 1 | 0.151 | 0.872 | 2.082 | 1.747   | 3.010    | 2.005  |       |       |       |       |       |       |       |
| 2  | Donor 2 | 0.461 | 0.512 | 1.699 | 1.663   | 3.543    | 1.598  |       |       |       |       |       |       |       |
| 3  | Donor 3 | 0.315 | 1.540 | 1.944 | 1.804   | 2.602    | 1.970  |       |       |       |       |       |       |       |
| 4  | Donor 4 | 0.541 | 0.774 | 1.793 | 1.554   | 2.755    | 1.770  |       |       |       |       |       |       |       |
| 5  |         |       |       |       |         |          |        |       |       |       |       |       |       |       |
| 6  |         |       |       |       |         |          |        |       |       |       |       |       |       |       |
| 7  |         |       |       |       |         |          |        |       |       |       |       |       |       |       |
| 8  |         |       |       |       |         |          |        |       |       |       |       |       |       |       |
| 9  |         |       |       |       |         |          |        |       |       |       |       |       |       |       |
| 10 |         |       |       |       |         |          |        |       |       |       |       |       |       |       |
| 11 |         |       |       |       |         |          |        |       |       |       |       |       |       |       |
| 12 |         |       |       |       |         |          |        |       |       |       |       |       |       |       |
| 13 |         |       |       |       |         |          |        |       |       |       |       |       |       |       |
| 14 |         |       |       |       |         |          |        |       |       |       |       |       |       |       |
| 15 |         |       |       |       |         |          |        |       |       |       |       |       |       |       |
| 16 |         |       |       |       |         |          |        |       |       |       |       |       |       |       |
| 17 |         |       |       |       |         |          |        |       |       |       |       |       |       |       |
| 18 |         |       |       |       |         |          |        |       |       |       |       |       |       |       |
| 19 |         |       |       |       |         |          |        |       |       |       |       |       |       |       |
| 20 |         |       |       |       |         |          |        |       |       |       |       |       |       |       |
| 21 |         |       |       |       |         |          |        |       |       |       |       |       |       |       |
| 22 |         |       |       |       |         |          |        |       |       |       |       |       |       |       |
| 23 |         |       |       |       |         |          |        |       |       |       |       |       |       |       |
| 24 |         |       |       |       |         |          |        |       |       |       |       |       |       |       |
| 25 |         |       |       |       |         |          |        |       |       |       |       |       |       |       |
| 26 |         |       |       |       |         |          |        |       |       |       |       |       |       |       |
| 27 |         |       |       |       |         |          |        |       |       |       |       |       |       |       |
| 28 |         |       |       |       |         |          |        |       |       |       |       |       |       |       |
| 29 |         |       |       |       |         |          |        |       |       |       |       |       |       |       |
| 30 |         |       |       |       |         |          |        |       |       |       |       |       |       |       |
| 31 |         |       |       |       |         |          |        |       |       |       |       |       |       |       |
| 32 |         |       |       |       |         |          |        |       |       |       |       |       |       |       |
| 33 |         |       |       |       |         |          |        |       |       |       |       |       |       |       |
| 34 |         |       |       |       |         |          |        |       |       |       |       |       |       |       |

Transform of Transpose of IL8 Row 1, A: RBCL

SourceDataforFigure5C — Edited

File Sheet Undo Clipboard Analysis Interpret Change Draw Write Text Export Print Send LA Help

Prism 8

Search

▼ Info

- Project info 1
- Project info 1
- New Info...

▼ Results

- Transpose of IL8
- Col Stats of IL8
- Transform of Transpose of IL8
- Mann-Whitney test of Transform of Transpose of IL8**
- Ordinary one-way ANOVA of Transpose of IL8
- Transpose of CCL5
- Col Stats of Transpose of CCL5
- Transform of Transpose of CCL5
- Mann-Whitney test of Transform of Transpose of CCL5
- Ordinary one-way ANOVA of Transform of Transpose of CC
- Transpose of CXCL9
- Col Stats of Transpose of CXCL9
- Transform of Transpose of CXCL9

Family

- IL8
  - Transpose
    - Transform
      - Mann-Whitney test**

| Mann-Whitney test |                                     |                               |
|-------------------|-------------------------------------|-------------------------------|
| 1                 | Table Analyzed                      | Transform of Transpose of IL8 |
| 2                 |                                     |                               |
| 3                 | Column D                            | XO+RBCL                       |
| 4                 | vs.                                 | vs.                           |
| 5                 | Column B                            | iRBCL                         |
| 6                 |                                     |                               |
| 7                 | <b>Mann Whitney test</b>            |                               |
| 8                 | P value                             | 0.0286                        |
| 9                 | Exact or approximate P value?       | Exact                         |
| 10                | P value summary                     | *                             |
| 11                | Significantly different (P < 0.05)? | Yes                           |
| 12                | One- or two-tailed P value?         | Two-tailed                    |
| 13                | Sum of ranks in column B,D          | 10 , 26                       |
| 14                | Mann-Whitney U                      | 0                             |
| 15                |                                     |                               |
| 16                | <b>Difference between medians</b>   |                               |
| 17                | Median of column B                  | 0.8231, n=4                   |
| 18                | Median of column D                  | 1.705, n=4                    |
| 19                | Difference: Actual                  | 0.8818                        |
| 20                | Difference: Hodges-Lehmann          | 0.8818                        |
| 21                |                                     |                               |
| 22                |                                     |                               |
| 23                |                                     |                               |
| 24                |                                     |                               |
| 25                |                                     |                               |
| 26                |                                     |                               |
| 27                |                                     |                               |
| 28                |                                     |                               |
| 29                |                                     |                               |
| 30                |                                     |                               |
| 31                |                                     |                               |
| 32                |                                     |                               |
| 33                |                                     |                               |
| 34                |                                     |                               |

Mann-Whitney test of Transform of Transpos Row 1, Column A

SourceDataforFigure5C — Edited

File Sheet Undo Clipboard Analysis Interpret Change Draw Write Text Export Print Send LA Help

Prism 8

Search

ANOVA results Multiple comparisons

Info

- Project info 1
- Project info 1
- New Info...

Results

- Transpose of IL8
- Col Stats of IL8
- Transform of Transpose of IL8
- Mann-Whitney test of Transform of Transpose of IL8
- Ordinary one-way ANOVA of Transpose of IL8**
- Transpose of CCL5
- Col Stats of Transpose of CCL5
- Transform of Transpose of CCL5
- Mann-Whitney test of Transform of Transpose of CCL5
- Ordinary one-way ANOVA of Transform of Transpose of CC
- Transpose of CXCL9
- Col Stats of Transpose of CXCL9
- Transform of Transpose of CXCL9

Family

- IL8
  - Transpose
    - Ordinary one-way ANOVA**

| Ordinary one-way ANOVA |                                             | ANOVA results    |           |           |                     |                |
|------------------------|---------------------------------------------|------------------|-----------|-----------|---------------------|----------------|
| 1                      | Table Analyzed                              | Transpose of IL8 |           |           |                     |                |
| 2                      | Data sets analyzed                          | A-F              |           |           |                     |                |
| 3                      |                                             |                  |           |           |                     |                |
| 4                      | <b>ANOVA summary</b>                        |                  |           |           |                     |                |
| 5                      | F                                           | 3.416            |           |           |                     |                |
| 6                      | P value                                     | 0.0241           |           |           |                     |                |
| 7                      | P value summary                             | *                |           |           |                     |                |
| 8                      | Significant diff. among means (P < 0.05)?   | Yes              |           |           |                     |                |
| 9                      | R square                                    | 0.4869           |           |           |                     |                |
| 10                     |                                             |                  |           |           |                     |                |
| 11                     | <b>Brown-Forsythe test</b>                  |                  |           |           |                     |                |
| 12                     | F (DFn, DFd)                                | 2.093 (5, 18)    |           |           |                     |                |
| 13                     | P value                                     | 0.1136           |           |           |                     |                |
| 14                     | P value summary                             | ns               |           |           |                     |                |
| 15                     | Are SDs significantly different (P < 0.05)? | No               |           |           |                     |                |
| 16                     |                                             |                  |           |           |                     |                |
| 17                     | <b>Bartlett's test</b>                      |                  |           |           |                     |                |
| 18                     | Bartlett's statistic (corrected)            | 101.4            |           |           |                     |                |
| 19                     | P value                                     | <0.0001          |           |           |                     |                |
| 20                     | P value summary                             | ****             |           |           |                     |                |
| 21                     | Are SDs significantly different (P < 0.05)? | Yes              |           |           |                     |                |
| 22                     |                                             |                  |           |           |                     |                |
| 23                     | <b>ANOVA table</b>                          | <b>SS</b>        | <b>DF</b> | <b>MS</b> | <b>F (DFn, DFd)</b> | <b>P value</b> |
| 24                     | Treatment (between columns)                 | 5888213          | 5         | 1177643   | F (5, 18) = 3.416   | P=0.0241       |
| 25                     | Residual (within columns)                   | 6205459          | 18        | 344748    |                     |                |
| 26                     | Total                                       | 12093672         | 23        |           |                     |                |
| 27                     |                                             |                  |           |           |                     |                |
| 28                     | <b>Data summary</b>                         |                  |           |           |                     |                |
| 29                     | Number of treatments (columns)              | 6                |           |           |                     |                |
| 30                     | Number of values (total)                    | 24               |           |           |                     |                |
| 31                     |                                             |                  |           |           |                     |                |
| 32                     |                                             |                  |           |           |                     |                |
| 33                     |                                             |                  |           |           |                     |                |

Ordinary one-way ANOVA of Transpose of IL8 Row 1, Column A

SourceDataforFigure5C — Edited

Prism 8

File Sheet Undo Clipboard Analysis Interpret Change Draw Write Text Export Print Send LA Help

11 Arial

Search

▼ Info

- Project info 1
- Project info 1
- New Info...

▼ Results

- Transpose of IL8
- Col Stats of IL8
- Transform of Transpose of IL8
- Mann-Whitney test of Transform of Transpose of IL8
- Ordinary one-way ANOVA of Transpose of IL8
- Transpose of CCL5**
- Col Stats of Transpose of CCL5
- Transform of Transpose of CCL5
- Mann-Whitney test of Transform of Transpose of CCL5
- Ordinary one-way ANOVA of Transform of Transpose of CCL5
- Transpose of CXCL9
- Col Stats of Transpose of CXCL9
- Transform of Transpose of CXCL9

Family

- CCL5**
  - Transpose**
    - Col Stats
    - Transform
      - Mann-Whitney test
      - Ordinary one-way ANOVA

| Transpose |         | A     | B     | C     | D       | E        | F      | G     | H     | I     | J     | K     | L     | M     |
|-----------|---------|-------|-------|-------|---------|----------|--------|-------|-------|-------|-------|-------|-------|-------|
|           |         | RBCL  | iRBCL | LPS   | XO+RBCL | XO+iRBCL | XO+LPS | Title | Title | Title | Title | Title | Title | Title |
|           | Y       | Y     | Y     | Y     | Y       | Y        | Y      | Y     | Y     | Y     | Y     | Y     | Y     | Y     |
| 1         | Donor 1 | 0.919 | 0.850 | 2.339 | 1.986   | 54.373   | 2.695  |       |       |       |       |       |       |       |
| 2         | Donor 2 | 0.725 | 0.592 | 3.167 | 2.795   | 93.755   | 2.924  |       |       |       |       |       |       |       |
| 3         | Donor 3 | 0.815 | 1.098 | 0.779 | 0.815   | 21.645   | 0.797  |       |       |       |       |       |       |       |
| 4         | Donor 4 | 1.258 | 0.671 | 0.796 | 0.628   | 56.123   | 0.931  |       |       |       |       |       |       |       |
| 5         |         |       |       |       |         |          |        |       |       |       |       |       |       |       |
| 6         |         |       |       |       |         |          |        |       |       |       |       |       |       |       |
| 7         |         |       |       |       |         |          |        |       |       |       |       |       |       |       |
| 8         |         |       |       |       |         |          |        |       |       |       |       |       |       |       |
| 9         |         |       |       |       |         |          |        |       |       |       |       |       |       |       |
| 10        |         |       |       |       |         |          |        |       |       |       |       |       |       |       |
| 11        |         |       |       |       |         |          |        |       |       |       |       |       |       |       |
| 12        |         |       |       |       |         |          |        |       |       |       |       |       |       |       |
| 13        |         |       |       |       |         |          |        |       |       |       |       |       |       |       |
| 14        |         |       |       |       |         |          |        |       |       |       |       |       |       |       |
| 15        |         |       |       |       |         |          |        |       |       |       |       |       |       |       |
| 16        |         |       |       |       |         |          |        |       |       |       |       |       |       |       |
| 17        |         |       |       |       |         |          |        |       |       |       |       |       |       |       |
| 18        |         |       |       |       |         |          |        |       |       |       |       |       |       |       |
| 19        |         |       |       |       |         |          |        |       |       |       |       |       |       |       |
| 20        |         |       |       |       |         |          |        |       |       |       |       |       |       |       |
| 21        |         |       |       |       |         |          |        |       |       |       |       |       |       |       |
| 22        |         |       |       |       |         |          |        |       |       |       |       |       |       |       |
| 23        |         |       |       |       |         |          |        |       |       |       |       |       |       |       |
| 24        |         |       |       |       |         |          |        |       |       |       |       |       |       |       |
| 25        |         |       |       |       |         |          |        |       |       |       |       |       |       |       |
| 26        |         |       |       |       |         |          |        |       |       |       |       |       |       |       |
| 27        |         |       |       |       |         |          |        |       |       |       |       |       |       |       |
| 28        |         |       |       |       |         |          |        |       |       |       |       |       |       |       |
| 29        |         |       |       |       |         |          |        |       |       |       |       |       |       |       |
| 30        |         |       |       |       |         |          |        |       |       |       |       |       |       |       |
| 31        |         |       |       |       |         |          |        |       |       |       |       |       |       |       |
| 32        |         |       |       |       |         |          |        |       |       |       |       |       |       |       |
| 33        |         |       |       |       |         |          |        |       |       |       |       |       |       |       |
| 34        |         |       |       |       |         |          |        |       |       |       |       |       |       |       |



File Sheet Undo Clipboard Analysis Interpret Change Draw Write Text Export Print Send LA Help

12 Helvetica

GraphPad Prism 8

Search

- ▼ Info
  - Project info 1
  - Project info 1
  - New info...
- ▼ Results
  - Transpose of IL8
  - Col Stats of IL8
  - Transform of Transpose of IL8
  - Mann-Whitney test of Transform of Transpose of IL8
  - Ordinary one-way ANOVA of Transpose of IL8
  - Transpose of CCL5**
  - Col Stats of Transpose of CCL5**
  - Transform of Transpose of CCL5
  - Mann-Whitney test of Transform of Transpose of CCL5
  - Ordinary one-way ANOVA of Transform of Transpose of CCL5
  - Transpose of CXCL9
  - Col Stats of Transpose of CXCL9
  - Transform of Transpose of CXCL9
  - Mann-Whitney test of Transform of Transpose of CXCL9

- Family
  - CCL5**
    - Transpose
    - Col Stats**

|    |                                                | A           | B           | C           | D           | E           | F           | G     | H     | I     | J     |
|----|------------------------------------------------|-------------|-------------|-------------|-------------|-------------|-------------|-------|-------|-------|-------|
|    |                                                | RBCL        | iRBCL       | LPS         | XO+RBCL     | XO+iRBCL    | XO+LPS      | Title | Title | Title | Title |
|    |                                                | Y           | Y           | Y           | Y           | Y           | Y           | Y     | Y     | Y     | Y     |
| 1  | Number of values                               | 4           | 4           | 4           | 4           | 4           | 4           |       |       |       |       |
| 2  |                                                |             |             |             |             |             |             |       |       |       |       |
| 3  | Minimum                                        | 0.7248      | 0.5918      | 0.7795      | 0.6284      | 21.65       | 0.7970      |       |       |       |       |
| 4  | 25% Percentile                                 | 0.7473      | 0.6116      | 0.7835      | 0.6750      | 29.83       | 0.8306      |       |       |       |       |
| 5  | Median                                         | 0.8668      | 0.7605      | 1.568       | 1.400       | 55.25       | 1.813       |       |       |       |       |
| 6  | 75% Percentile                                 | 1.173       | 1.036       | 2.960       | 2.593       | 84.35       | 2.867       |       |       |       |       |
| 7  | Maximum                                        | 1.258       | 1.098       | 3.167       | 2.795       | 93.76       | 2.924       |       |       |       |       |
| 8  |                                                |             |             |             |             |             |             |       |       |       |       |
| 9  | Mean                                           | 0.9290      | 0.8028      | 1.770       | 1.556       | 56.47       | 1.837       |       |       |       |       |
| 10 | Std. Deviation                                 | 0.2331      | 0.2247      | 1.184       | 1.021       | 29.48       | 1.128       |       |       |       |       |
| 11 | Std. Error of Mean                             | 0.1165      | 0.1124      | 0.5921      | 0.5107      | 14.74       | 0.5641      |       |       |       |       |
| 12 |                                                |             |             |             |             |             |             |       |       |       |       |
| 13 | Lower 95% CI of mean                           | 0.5582      | 0.4452      | -0.1138     | -0.06921    | 9.562       | 0.04144     |       |       |       |       |
| 14 | Upper 95% CI of mean                           | 1.300       | 1.160       | 3.655       | 3.181       | 103.4       | 3.632       |       |       |       |       |
| 15 |                                                |             |             |             |             |             |             |       |       |       |       |
| 16 | Sum                                            | 3.716       | 3.211       | 7.082       | 6.224       | 225.9       | 7.347       |       |       |       |       |
| 17 |                                                |             |             |             |             |             |             |       |       |       |       |
| 18 | <b>D'Agostino &amp; Pearson normality test</b> |             |             |             |             |             |             |       |       |       |       |
| 19 | K2                                             | N too small | N too small | N too small | N too small | N too small | N too small |       |       |       |       |
| 20 | P value                                        |             |             |             |             |             |             |       |       |       |       |
| 21 | Passed normality test (alpha=0.05)?            |             |             |             |             |             |             |       |       |       |       |
| 22 | P value summary                                |             |             |             |             |             |             |       |       |       |       |
| 23 |                                                |             |             |             |             |             |             |       |       |       |       |
| 24 | <b>Shapiro-Wilk normality test</b>             |             |             |             |             |             |             |       |       |       |       |
| 25 | W                                              | 0.9031      | 0.9430      | 0.8561      | 0.9059      | 0.9530      | 0.8066      |       |       |       |       |
| 26 | P value                                        | 0.4464      | 0.6724      | 0.2466      | 0.4611      | 0.7351      | 0.1146      |       |       |       |       |
| 27 | Passed normality test (alpha=0.05)?            | Yes         | Yes         | Yes         | Yes         | Yes         | Yes         |       |       |       |       |
| 28 | P value summary                                | ns          | ns          | ns          | ns          | ns          | ns          |       |       |       |       |
| 29 |                                                |             |             |             |             |             |             |       |       |       |       |
| 30 | <b>KS normality test</b>                       |             |             |             |             |             |             |       |       |       |       |
| 31 | KS distance                                    | N too small | N too small | N too small | N too small | N too small | N too small |       |       |       |       |
| 32 | P value                                        |             |             |             |             |             |             |       |       |       |       |
| 33 | Passed normality test (alpha=0.05)?            |             |             |             |             |             |             |       |       |       |       |
| 34 | P value summary                                |             |             |             |             |             |             |       |       |       |       |

SourceDataforFigure5C — Edited

Prism 8

File Sheet Undo Clipboard Analysis Interpret Change Draw Write Text Export Print Send LA Help

Search

▼ Info Project info 1

- Project info 1
- New Info...

▼ Results

- Transpose of IL8
- Col Stats of IL8
- Transform of Transpose of IL8
- Mann-Whitney test of Transform of Transpose of IL8
- Ordinary one-way ANOVA of Transpose of IL8
- Transpose of CCL5**
- Col Stats of Transpose of CCL5
- Transform of Transpose of CCL5**
- Mann-Whitney test of Transform of Transpose of CCL5
- Ordinary one-way ANOVA of Transform of Transpose of CCL5
- Transpose of CXCL9
- Col Stats of Transpose of CXCL9
- Transform of Transpose of CXCL9
- Mann-Whitney test of Transform of Transpose of CXCL9

Family

- CCL5**
  - Transpose**
    - Transform**
    - Mann-Whitney test
    - Ordinary one-way ANOVA

|    |           | A      | B      | C      | D       | E        | F      | G     | H     | I     | J     | K     | L     |
|----|-----------|--------|--------|--------|---------|----------|--------|-------|-------|-------|-------|-------|-------|
|    | Transform | RBCL   | iRBCL  | LPS    | XO+RBCL | XO+iRBCL | XO+LPS | Title | Title | Title | Title | Title | Title |
|    |           | Y      | Y      | Y      | Y       | Y        | Y      | Y     | Y     | Y     | Y     | Y     | Y     |
| 1  | Donor 1   | -0.037 | -0.071 | 0.369  | 0.298   | 1.735    | 0.431  |       |       |       |       |       |       |
| 2  | Donor 2   | -0.140 | -0.228 | 0.501  | 0.446   | 1.972    | 0.466  |       |       |       |       |       |       |
| 3  | Donor 3   | -0.089 | 0.041  | -0.108 | -0.089  | 1.335    | -0.099 |       |       |       |       |       |       |
| 4  | Donor 4   | 0.100  | -0.173 | -0.099 | -0.202  | 1.749    | -0.031 |       |       |       |       |       |       |
| 5  |           |        |        |        |         |          |        |       |       |       |       |       |       |
| 6  |           |        |        |        |         |          |        |       |       |       |       |       |       |
| 7  |           |        |        |        |         |          |        |       |       |       |       |       |       |
| 8  |           |        |        |        |         |          |        |       |       |       |       |       |       |
| 9  |           |        |        |        |         |          |        |       |       |       |       |       |       |
| 10 |           |        |        |        |         |          |        |       |       |       |       |       |       |
| 11 |           |        |        |        |         |          |        |       |       |       |       |       |       |
| 12 |           |        |        |        |         |          |        |       |       |       |       |       |       |
| 13 |           |        |        |        |         |          |        |       |       |       |       |       |       |
| 14 |           |        |        |        |         |          |        |       |       |       |       |       |       |
| 15 |           |        |        |        |         |          |        |       |       |       |       |       |       |
| 16 |           |        |        |        |         |          |        |       |       |       |       |       |       |
| 17 |           |        |        |        |         |          |        |       |       |       |       |       |       |
| 18 |           |        |        |        |         |          |        |       |       |       |       |       |       |
| 19 |           |        |        |        |         |          |        |       |       |       |       |       |       |
| 20 |           |        |        |        |         |          |        |       |       |       |       |       |       |
| 21 |           |        |        |        |         |          |        |       |       |       |       |       |       |
| 22 |           |        |        |        |         |          |        |       |       |       |       |       |       |
| 23 |           |        |        |        |         |          |        |       |       |       |       |       |       |
| 24 |           |        |        |        |         |          |        |       |       |       |       |       |       |
| 25 |           |        |        |        |         |          |        |       |       |       |       |       |       |
| 26 |           |        |        |        |         |          |        |       |       |       |       |       |       |
| 27 |           |        |        |        |         |          |        |       |       |       |       |       |       |
| 28 |           |        |        |        |         |          |        |       |       |       |       |       |       |
| 29 |           |        |        |        |         |          |        |       |       |       |       |       |       |
| 30 |           |        |        |        |         |          |        |       |       |       |       |       |       |
| 31 |           |        |        |        |         |          |        |       |       |       |       |       |       |
| 32 |           |        |        |        |         |          |        |       |       |       |       |       |       |
| 33 |           |        |        |        |         |          |        |       |       |       |       |       |       |
| 34 |           |        |        |        |         |          |        |       |       |       |       |       |       |

Transform of Transpose of CCL5 Row 1, A: RBCL

SourceDataforFigure5C — Edited

Prism 8

File Sheet Undo Clipboard Analysis Interpret Change Draw Write Text Export Print Send LA Help

12 Helvetica

Search

▼ Info

Project info 1

Project info 1

New Info...

▼ Results

- Transpose of IL8
- Col Stats of IL8
- Transform of Transpose of IL8
- Mann-Whitney test of Transform of Transpose of IL8
- Ordinary one-way ANOVA of Transpose of IL8
- Transpose of CCL5**
- Col Stats of Transpose of CCL5
- Transform of Transpose of CCL5**
- Mann-Whitney test of Transform of Transpose of CCL5**
- Ordinary one-way ANOVA of Transform of Transpose of CC
- Transpose of CXCL9
- Col Stats of Transpose of CXCL9
- Transform of Transpose of CXCL9
- Mann-Whitney test of Transform of Transpose of CXCL9

Family

- CCL5**
  - Transpose
    - Transform
      - Mann-Whitney test**

Mann-Whitney test

|    |                                     |                                |
|----|-------------------------------------|--------------------------------|
| 1  | Table Analyzed                      | Transform of Transpose of CCL5 |
| 2  |                                     |                                |
| 3  | Column D                            | XO+RBCL                        |
| 4  | vs.                                 | vs.                            |
| 5  | Column B                            | iRBCL                          |
| 6  |                                     |                                |
| 7  | <b>Mann Whitney test</b>            |                                |
| 8  | P value                             | 0.4857                         |
| 9  | Exact or approximate P value?       | Exact                          |
| 10 | P value summary                     | ns                             |
| 11 | Significantly different (P < 0.05)? | No                             |
| 12 | One- or two-tailed P value?         | Two-tailed                     |
| 13 | Sum of ranks in column B,D          | 15 , 21                        |
| 14 | Mann-Whitney U                      | 5                              |
| 15 |                                     |                                |
| 16 | <b>Difference between medians</b>   |                                |
| 17 | Median of column B                  | -0.1219, n=4                   |
| 18 | Median of column D                  | 0.1045, n=4                    |
| 19 | Difference: Actual                  | 0.2264                         |
| 20 | Difference: Hodges-Lehmann          | 0.1980                         |
| 21 |                                     |                                |
| 22 |                                     |                                |
| 23 |                                     |                                |
| 24 |                                     |                                |
| 25 |                                     |                                |
| 26 |                                     |                                |
| 27 |                                     |                                |
| 28 |                                     |                                |
| 29 |                                     |                                |
| 30 |                                     |                                |
| 31 |                                     |                                |
| 32 |                                     |                                |
| 33 |                                     |                                |
| 34 |                                     |                                |

Mann-Whitney test of Transform of Transpos Row 1, Column A

SourceDataforFigure5C — Edited

File Sheet Undo Clipboard Analysis Interpret Change Draw Write Text Export Print Send LA Help

Prism 8

Search

ANOVA results Multiple comparisons

Info Project info 1

- Project info 1
- New Info...

Results

- Transpose of IL8
- Col Stats of IL8
- Transform of Transpose of IL8
- Mann-Whitney test of Transform of Transpose of IL8
- Ordinary one-way ANOVA of Transpose of IL8
- Transpose of CCL5**
- Col Stats of Transpose of CCL5
- Transform of Transpose of CCL5**
- Mann-Whitney test of Transform of Transpose of CCL5
- Ordinary one-way ANOVA of Transform of Transpose of CCL5**
- Transpose of CXCL9
- Col Stats of Transpose of CXCL9
- Transform of Transpose of CXCL9
- Mann-Whitney test of Transform of Transpose of CXCL9

Family

- CCL5**
  - Transpose
    - Transform**
      - Ordinary one-way ANOVA**

| Ordinary one-way ANOVA |                                             |                                |           |           |                     |                |
|------------------------|---------------------------------------------|--------------------------------|-----------|-----------|---------------------|----------------|
| ANOVA results          |                                             |                                |           |           |                     |                |
| 1                      | Table Analyzed                              | Transform of Transpose of CCL5 |           |           |                     |                |
| 2                      | Data sets analyzed                          | A-F                            |           |           |                     |                |
| 3                      |                                             |                                |           |           |                     |                |
| 4                      | <b>ANOVA summary</b>                        |                                |           |           |                     |                |
| 5                      | F                                           | 29.11                          |           |           |                     |                |
| 6                      | P value                                     | <0.0001                        |           |           |                     |                |
| 7                      | P value summary                             | ****                           |           |           |                     |                |
| 8                      | Significant diff. among means (P < 0.05)?   | Yes                            |           |           |                     |                |
| 9                      | R square                                    | 0.8899                         |           |           |                     |                |
| 10                     |                                             |                                |           |           |                     |                |
| 11                     | <b>Brown-Forsythe test</b>                  |                                |           |           |                     |                |
| 12                     | F (DFn, DFd)                                | 3.383 (5, 18)                  |           |           |                     |                |
| 13                     | P value                                     | 0.0250                         |           |           |                     |                |
| 14                     | P value summary                             | *                              |           |           |                     |                |
| 15                     | Are SDs significantly different (P < 0.05)? | Yes                            |           |           |                     |                |
| 16                     |                                             |                                |           |           |                     |                |
| 17                     | <b>Bartlett's test</b>                      |                                |           |           |                     |                |
| 18                     | Bartlett's statistic (corrected)            | 5.219                          |           |           |                     |                |
| 19                     | P value                                     | 0.3898                         |           |           |                     |                |
| 20                     | P value summary                             | ns                             |           |           |                     |                |
| 21                     | Are SDs significantly different (P < 0.05)? | No                             |           |           |                     |                |
| 22                     |                                             |                                |           |           |                     |                |
| 23                     | <b>ANOVA table</b>                          | <b>SS</b>                      | <b>DF</b> | <b>MS</b> | <b>F (DFn, DFd)</b> | <b>P value</b> |
| 24                     | Treatment (between columns)                 | 9.175                          | 5         | 1.835     | F (5, 18) = 29.11   | P<0.0001       |
| 25                     | Residual (within columns)                   | 1.135                          | 18        | 0.06303   |                     |                |
| 26                     | Total                                       | 10.31                          | 23        |           |                     |                |
| 27                     |                                             |                                |           |           |                     |                |
| 28                     | <b>Data summary</b>                         |                                |           |           |                     |                |
| 29                     | Number of treatments (columns)              | 6                              |           |           |                     |                |
| 30                     | Number of values (total)                    | 24                             |           |           |                     |                |
| 31                     |                                             |                                |           |           |                     |                |
| 32                     |                                             |                                |           |           |                     |                |
| 33                     |                                             |                                |           |           |                     |                |

Ordinary one-way ANOVA of Transform of Tr... Row 1, Column A

SourceDataforFigure5C — Edited

File Sheet Undo Clipboard Analysis Interpret Change Draw Write Text Export Print Send LA Help

Prism 8

Search

ANOVA results Multiple comparisons

Info Project info 1

- Project info 1
- New Info...

Results

- Transpose of IL8
- Col Stats of IL8
- Transform of Transpose of IL8
- Mann-Whitney test of Transform of Transpose of IL8
- Ordinary one-way ANOVA of Transpose of IL8
- Transpose of CCL5
- Col Stats of Transpose of CCL5
- Transform of Transpose of CCL5
- Mann-Whitney test of Transform of Transpose of CCL5
- Ordinary one-way ANOVA of Transform of Transpose of CCL5**
- Transpose of CXCL9
- Col Stats of Transpose of CXCL9
- Transform of Transpose of CXCL9
- Mann-Whitney test of Transform of Transpose of CXCL9

Family

- CCL5
  - Transpose
    - Transform
      - Ordinary one-way ANOVA**

| Ordinary one-way ANOVA |                                   |                   |                           |                     |                    |                         |           |          |           |
|------------------------|-----------------------------------|-------------------|---------------------------|---------------------|--------------------|-------------------------|-----------|----------|-----------|
| Multiple comparisons   |                                   |                   |                           |                     |                    |                         |           |          |           |
| 1                      | Number of families                | 1                 |                           |                     |                    |                         |           |          |           |
| 2                      | Number of comparisons per f       | 15                |                           |                     |                    |                         |           |          |           |
| 3                      | Alpha                             | 0.05              |                           |                     |                    |                         |           |          |           |
| 4                      |                                   |                   |                           |                     |                    |                         |           |          |           |
| 5                      | <b>Tukey's multiple compariso</b> | <b>Mean Diff.</b> | <b>95.00% CI of diff.</b> | <b>Significant?</b> | <b>Summary</b>     | <b>Adjusted P Value</b> |           |          |           |
| 6                      | RBCL vs. iRBCL                    | 0.06624           | -0.4980 to 0.6304         | No                  | ns                 | 0.9989                  |           | A-B      |           |
| 7                      | RBCL vs. LPS                      | -0.2071           | -0.7713 to 0.3571         | No                  | ns                 | 0.8467                  |           | A-C      |           |
| 8                      | RBCL vs. XO+RBCL                  | -0.1549           | -0.7191 to 0.4093         | No                  | ns                 | 0.9484                  |           | A-D      |           |
| 9                      | RBCL vs. XO+iRBCL                 | -1.739            | -2.304 to -1.175          | Yes                 | ****               | <0.0001                 |           | A-E      |           |
| 10                     | RBCL vs. XO+LPS                   | -0.2332           | -0.7974 to 0.3310         | No                  | ns                 | 0.7740                  |           | A-F      |           |
| 11                     | iRBCL vs. LPS                     | -0.2733           | -0.8375 to 0.2909         | No                  | ns                 | 0.6451                  |           | B-C      |           |
| 12                     | iRBCL vs. XO+RBCL                 | -0.2211           | -0.7853 to 0.3431         | No                  | ns                 | 0.8092                  |           | B-D      |           |
| 13                     | iRBCL vs. XO+iRBCL                | -1.806            | -2.370 to -1.241          | Yes                 | ****               | <0.0001                 |           | B-E      |           |
| 14                     | iRBCL vs. XO+LPS                  | -0.2995           | -0.8637 to 0.2647         | No                  | ns                 | 0.5565                  |           | B-F      |           |
| 15                     | LPS vs. XO+RBCL                   | 0.05219           | -0.5120 to 0.6164         | No                  | ns                 | 0.9996                  |           | C-D      |           |
| 16                     | LPS vs. XO+iRBCL                  | -1.532            | -2.097 to -0.9682         | Yes                 | ****               | <0.0001                 |           | C-E      |           |
| 17                     | LPS vs. XO+LPS                    | -0.02620          | -0.5904 to 0.5380         | No                  | ns                 | >0.9999                 |           | C-F      |           |
| 18                     | XO+RBCL vs. XO+iRBCL              | -1.585            | -2.149 to -1.020          | Yes                 | ****               | <0.0001                 |           | D-E      |           |
| 19                     | XO+RBCL vs. XO+LPS                | -0.07838          | -0.6426 to 0.4858         | No                  | ns                 | 0.9975                  |           | D-F      |           |
| 20                     | XO+iRBCL vs. XO+LPS               | 1.506             | 0.9420 to 2.070           | Yes                 | ****               | <0.0001                 |           | E-F      |           |
| 21                     |                                   |                   |                           |                     |                    |                         |           |          |           |
| 22                     | <b>Test details</b>               | <b>Mean 1</b>     | <b>Mean 2</b>             | <b>Mean Diff.</b>   | <b>SE of diff.</b> | <b>n1</b>               | <b>n2</b> | <b>q</b> | <b>DF</b> |
| 23                     | RBCL vs. iRBCL                    | -0.04148          | -0.1077                   | 0.06624             | 0.1775             | 4                       | 4         | 0.5277   | 18        |
| 24                     | RBCL vs. LPS                      | -0.04148          | 0.1656                    | -0.2071             | 0.1775             | 4                       | 4         | 1.649    | 18        |
| 25                     | RBCL vs. XO+RBCL                  | -0.04148          | 0.1134                    | -0.1549             | 0.1775             | 4                       | 4         | 1.234    | 18        |
| 26                     | RBCL vs. XO+iRBCL                 | -0.04148          | 1.698                     | -1.739              | 0.1775             | 4                       | 4         | 13.86    | 18        |
| 27                     | RBCL vs. XO+LPS                   | -0.04148          | 0.1918                    | -0.2332             | 0.1775             | 4                       | 4         | 1.858    | 18        |
| 28                     | iRBCL vs. LPS                     | -0.1077           | 0.1656                    | -0.2733             | 0.1775             | 4                       | 4         | 2.177    | 18        |
| 29                     | iRBCL vs. XO+RBCL                 | -0.1077           | 0.1134                    | -0.2211             | 0.1775             | 4                       | 4         | 1.761    | 18        |
| 30                     | iRBCL vs. XO+iRBCL                | -0.1077           | 1.698                     | -1.806              | 0.1775             | 4                       | 4         | 14.38    | 18        |
| 31                     | iRBCL vs. XO+LPS                  | -0.1077           | 0.1918                    | -0.2995             | 0.1775             | 4                       | 4         | 2.386    | 18        |
| 32                     | LPS vs. XO+RBCL                   | 0.1656            | 0.1134                    | 0.05219             | 0.1775             | 4                       | 4         | 0.4157   | 18        |
| 33                     | LPS vs. XO+iRBCL                  | 0.1656            | 1.698                     | -1.532              | 0.1775             | 4                       | 4         | 12.21    | 18        |

Ordinary one-way ANOVA of Transform of Tr... Row 1, Column A

SourceDataforFigure5C — Edited

File Sheet Undo Clipboard Analysis Interpret Change Draw Write Text Export Print Send LA Help

Prism 8

Search

ANOVA results

Multiple comparisons

Info Project info 1

Project info 1

New Info...

Results

- Transpose of IL8
- Col Stats of IL8
- Transform of Transpose of IL8
- Mann-Whitney test of Transform of Transpose of IL8
- Ordinary one-way ANOVA of Transpose of IL8
- Transpose of CCL5
- Col Stats of Transpose of CCL5
- Transform of Transpose of CCL5
- Mann-Whitney test of Transform of Transpose of CCL5
- Ordinary one-way ANOVA of Transform of Transpose of CCL5
- Transpose of CXCL9
- Col Stats of Transpose of CXCL9
- Transform of Transpose of CXCL9
- Mann-Whitney test of Transform of Transpose of CXCL9

Family

- CCL5
  - Transpose
    - Transform
      - Ordinary one-way ANOVA

| 11 | iRBCL vs. LPS        | -0.2733       | -0.8375 to 0.2909 | No                | ns                 | 0.6451    | B-C       |          |           |
|----|----------------------|---------------|-------------------|-------------------|--------------------|-----------|-----------|----------|-----------|
| 12 | iRBCL vs. XO+RBCL    | -0.2211       | -0.7853 to 0.3431 | No                | ns                 | 0.8092    | B-D       |          |           |
| 13 | iRBCL vs. XO+iRBCL   | -1.806        | -2.370 to -1.241  | Yes               | ****               | <0.0001   | B-E       |          |           |
| 14 | iRBCL vs. XO+LPS     | -0.2995       | -0.8637 to 0.2647 | No                | ns                 | 0.5565    | B-F       |          |           |
| 15 | LPS vs. XO+RBCL      | 0.05219       | -0.5120 to 0.6164 | No                | ns                 | 0.9996    | C-D       |          |           |
| 16 | LPS vs. XO+iRBCL     | -1.532        | -2.097 to -0.9682 | Yes               | ****               | <0.0001   | C-E       |          |           |
| 17 | LPS vs. XO+LPS       | -0.02620      | -0.5904 to 0.5380 | No                | ns                 | >0.9999   | C-F       |          |           |
| 18 | XO+RBCL vs. XO+iRBCL | -1.585        | -2.149 to -1.020  | Yes               | ****               | <0.0001   | D-E       |          |           |
| 19 | XO+RBCL vs. XO+LPS   | -0.07838      | -0.6426 to 0.4858 | No                | ns                 | 0.9975    | D-F       |          |           |
| 20 | XO+iRBCL vs. XO+LPS  | 1.506         | 0.9420 to 2.070   | Yes               | ****               | <0.0001   | E-F       |          |           |
| 21 |                      |               |                   |                   |                    |           |           |          |           |
| 22 | <b>Test details</b>  | <b>Mean 1</b> | <b>Mean 2</b>     | <b>Mean Diff.</b> | <b>SE of diff.</b> | <b>n1</b> | <b>n2</b> | <b>q</b> | <b>DF</b> |
| 23 | RBCL vs. iRBCL       | -0.04148      | -0.1077           | 0.06624           | 0.1775             | 4         | 4         | 0.5277   | 18        |
| 24 | RBCL vs. LPS         | -0.04148      | 0.1656            | -0.2071           | 0.1775             | 4         | 4         | 1.649    | 18        |
| 25 | RBCL vs. XO+RBCL     | -0.04148      | 0.1134            | -0.1549           | 0.1775             | 4         | 4         | 1.234    | 18        |
| 26 | RBCL vs. XO+iRBCL    | -0.04148      | 1.698             | -1.739            | 0.1775             | 4         | 4         | 13.86    | 18        |
| 27 | RBCL vs. XO+LPS      | -0.04148      | 0.1918            | -0.2332           | 0.1775             | 4         | 4         | 1.858    | 18        |
| 28 | iRBCL vs. LPS        | -0.1077       | 0.1656            | -0.2733           | 0.1775             | 4         | 4         | 2.177    | 18        |
| 29 | iRBCL vs. XO+RBCL    | -0.1077       | 0.1134            | -0.2211           | 0.1775             | 4         | 4         | 1.761    | 18        |
| 30 | iRBCL vs. XO+iRBCL   | -0.1077       | 1.698             | -1.806            | 0.1775             | 4         | 4         | 14.38    | 18        |
| 31 | iRBCL vs. XO+LPS     | -0.1077       | 0.1918            | -0.2995           | 0.1775             | 4         | 4         | 2.386    | 18        |
| 32 | LPS vs. XO+RBCL      | 0.1656        | 0.1134            | 0.05219           | 0.1775             | 4         | 4         | 0.4157   | 18        |
| 33 | LPS vs. XO+iRBCL     | 0.1656        | 1.698             | -1.532            | 0.1775             | 4         | 4         | 12.21    | 18        |
| 34 | LPS vs. XO+LPS       | 0.1656        | 0.1918            | -0.02620          | 0.1775             | 4         | 4         | 0.2087   | 18        |
| 35 | XO+RBCL vs. XO+iRBCL | 0.1134        | 1.698             | -1.585            | 0.1775             | 4         | 4         | 12.62    | 18        |
| 36 | XO+RBCL vs. XO+LPS   | 0.1134        | 0.1918            | -0.07838          | 0.1775             | 4         | 4         | 0.6244   | 18        |
| 37 | XO+iRBCL vs. XO+LPS  | 1.698         | 0.1918            | 1.506             | 0.1775             | 4         | 4         | 12.00    | 18        |
| 38 |                      |               |                   |                   |                    |           |           |          |           |
| 39 |                      |               |                   |                   |                    |           |           |          |           |
| 40 |                      |               |                   |                   |                    |           |           |          |           |
| 41 |                      |               |                   |                   |                    |           |           |          |           |
| 42 |                      |               |                   |                   |                    |           |           |          |           |
| 43 |                      |               |                   |                   |                    |           |           |          |           |

Ordinary one-way ANOVA of Transform of Tr

Row 1, Column A

SourceDataforFigure5C — Edited

File Sheet Undo Clipboard Analysis Interpret Change Draw Write Text Export Print Send LA Help

Prism 8

Search

▼ Info Project info 1

- Project info 1
- New Info...

▼ Results

- Transpose of IL8
- Col Stats of IL8
- Transform of Transpose of IL8
- Mann-Whitney test of Transform of Transpose of IL8
- Ordinary one-way ANOVA of Transpose of IL8
- Transpose of CCL5
- Col Stats of Transpose of CCL5
- Transform of Transpose of CCL5
- Mann-Whitney test of Transform of Transpose of CCL5
- Ordinary one-way ANOVA of Transform of Transpose of CCL5
- Transpose of CXCL9**
- Col Stats of Transpose of CXCL9
- Transform of Transpose of CXCL9
- Mann-Whitney test of Transform of Transpose of CXCL9

Family

- CXCL9**
  - Transpose**
  - Col Stats
  - Transform
  - Mann-Whitney test
  - Ordinary one-way ANOVA

|    |           | A     | B     | C      | D       | E        | F      | G     | H     | I     | J     | K     | L     |
|----|-----------|-------|-------|--------|---------|----------|--------|-------|-------|-------|-------|-------|-------|
|    | Transpose | RBCL  | iRBCL | LPS    | XO+RBCL | XO+iRBCL | XO+LPS | Title | Title | Title | Title | Title | Title |
|    |           | Y     | Y     | Y      | Y       | Y        | Y      | Y     | Y     | Y     | Y     | Y     | Y     |
| 1  | Donor 1   | 0.689 | 0.795 | 10.481 | 8.338   | 37.723   | 18.342 |       |       |       |       |       |       |
| 2  | Donor 2   | 0.634 | 0.838 | 92.491 | 39.849  | 455.123  | 46.545 |       |       |       |       |       |       |
| 3  | Donor 3   | 1.092 | 2.276 | 8.426  | 0.953   | 1.890    | 9.797  |       |       |       |       |       |       |
| 4  | Donor 4   | 4.389 | 1.021 | 15.415 | 4.438   | 86.228   | 12.024 |       |       |       |       |       |       |
| 5  |           |       |       |        |         |          |        |       |       |       |       |       |       |
| 6  |           |       |       |        |         |          |        |       |       |       |       |       |       |
| 7  |           |       |       |        |         |          |        |       |       |       |       |       |       |
| 8  |           |       |       |        |         |          |        |       |       |       |       |       |       |
| 9  |           |       |       |        |         |          |        |       |       |       |       |       |       |
| 10 |           |       |       |        |         |          |        |       |       |       |       |       |       |
| 11 |           |       |       |        |         |          |        |       |       |       |       |       |       |
| 12 |           |       |       |        |         |          |        |       |       |       |       |       |       |
| 13 |           |       |       |        |         |          |        |       |       |       |       |       |       |
| 14 |           |       |       |        |         |          |        |       |       |       |       |       |       |
| 15 |           |       |       |        |         |          |        |       |       |       |       |       |       |
| 16 |           |       |       |        |         |          |        |       |       |       |       |       |       |
| 17 |           |       |       |        |         |          |        |       |       |       |       |       |       |
| 18 |           |       |       |        |         |          |        |       |       |       |       |       |       |
| 19 |           |       |       |        |         |          |        |       |       |       |       |       |       |
| 20 |           |       |       |        |         |          |        |       |       |       |       |       |       |
| 21 |           |       |       |        |         |          |        |       |       |       |       |       |       |
| 22 |           |       |       |        |         |          |        |       |       |       |       |       |       |
| 23 |           |       |       |        |         |          |        |       |       |       |       |       |       |
| 24 |           |       |       |        |         |          |        |       |       |       |       |       |       |
| 25 |           |       |       |        |         |          |        |       |       |       |       |       |       |
| 26 |           |       |       |        |         |          |        |       |       |       |       |       |       |
| 27 |           |       |       |        |         |          |        |       |       |       |       |       |       |
| 28 |           |       |       |        |         |          |        |       |       |       |       |       |       |
| 29 |           |       |       |        |         |          |        |       |       |       |       |       |       |
| 30 |           |       |       |        |         |          |        |       |       |       |       |       |       |
| 31 |           |       |       |        |         |          |        |       |       |       |       |       |       |
| 32 |           |       |       |        |         |          |        |       |       |       |       |       |       |
| 33 |           |       |       |        |         |          |        |       |       |       |       |       |       |
| 34 |           |       |       |        |         |          |        |       |       |       |       |       |       |

Transpose of CXCL9 Row 1, A: RBCL

SourceDataforFigure5C — Edited

Prism 8

File Sheet Undo Clipboard Analysis Interpret Change Draw Write Text Export Print Send LA Help

12 Helvetica

Search

▼ Info Project info 1

- Project info 1
- New Info...

▼ Results

- Transpose of IL8
- Col Stats of IL8
- Transform of Transpose of IL8
- Mann-Whitney test of Transform of Transpose of IL8
- Ordinary one-way ANOVA of Transpose of IL8
- Transpose of CCL5
- Col Stats of Transpose of CCL5
- Transform of Transpose of CCL5
- Mann-Whitney test of Transform of Transpose of CCL5
- Ordinary one-way ANOVA of Transform of Transpose of CCL5
- Transpose of CXCL9
- Col Stats of Transpose of CXCL9**
- Transform of Transpose of CXCL9
- Mann-Whitney test of Transform of Transpose of CXCL9

Family

- CXCL9**
  - Transpose
    - Col Stats**

|    |                                     | A           | B           | C           | D           | E           | F           | G     | H     | I     | J     |
|----|-------------------------------------|-------------|-------------|-------------|-------------|-------------|-------------|-------|-------|-------|-------|
|    | <b>Col Stats</b>                    | RBCL        | iRBCL       | LPS         | XO+RBCL     | XO+iRBCL    | XO+LPS      | Title | Title | Title | Title |
|    |                                     | Y           | Y           | Y           | Y           | Y           | Y           | Y     | Y     | Y     | Y     |
| 19 | K2                                  | N too small | N too small | N too small | N too small | N too small | N too small |       |       |       |       |
| 20 | P value                             |             |             |             |             |             |             |       |       |       |       |
| 21 | Passed normality test (alpha=0.05)? |             |             |             |             |             |             |       |       |       |       |
| 22 | P value summary                     |             |             |             |             |             |             |       |       |       |       |
| 23 |                                     |             |             |             |             |             |             |       |       |       |       |
| 24 | <b>Shapiro-Wilk normality test</b>  |             |             |             |             |             |             |       |       |       |       |
| 25 | W                                   | 0.7183      | 0.7424      | 0.6932      | 0.7806      | 0.7759      | 0.8011      |       |       |       |       |
| 26 | P value                             | 0.0186      | 0.0327      | 0.0097      | 0.0717      | 0.0655      | 0.1042      |       |       |       |       |
| 27 | Passed normality test (alpha=0.05)? | No          | No          | No          | Yes         | Yes         | Yes         |       |       |       |       |
| 28 | P value summary                     | *           | *           | **          | ns          | ns          | ns          |       |       |       |       |
| 29 |                                     |             |             |             |             |             |             |       |       |       |       |
| 30 | <b>KS normality test</b>            |             |             |             |             |             |             |       |       |       |       |
| 31 | KS distance                         | N too small | N too small | N too small | N too small | N too small | N too small |       |       |       |       |
| 32 | P value                             |             |             |             |             |             |             |       |       |       |       |
| 33 | Passed normality test (alpha=0.05)? |             |             |             |             |             |             |       |       |       |       |
| 34 | P value summary                     |             |             |             |             |             |             |       |       |       |       |
| 35 |                                     |             |             |             |             |             |             |       |       |       |       |
| 36 |                                     |             |             |             |             |             |             |       |       |       |       |
| 37 |                                     |             |             |             |             |             |             |       |       |       |       |
| 38 |                                     |             |             |             |             |             |             |       |       |       |       |
| 39 |                                     |             |             |             |             |             |             |       |       |       |       |
| 40 |                                     |             |             |             |             |             |             |       |       |       |       |
| 41 |                                     |             |             |             |             |             |             |       |       |       |       |
| 42 |                                     |             |             |             |             |             |             |       |       |       |       |
| 43 |                                     |             |             |             |             |             |             |       |       |       |       |
| 44 |                                     |             |             |             |             |             |             |       |       |       |       |
| 45 |                                     |             |             |             |             |             |             |       |       |       |       |
| 46 |                                     |             |             |             |             |             |             |       |       |       |       |
| 47 |                                     |             |             |             |             |             |             |       |       |       |       |
| 48 |                                     |             |             |             |             |             |             |       |       |       |       |
| 49 |                                     |             |             |             |             |             |             |       |       |       |       |
| 50 |                                     |             |             |             |             |             |             |       |       |       |       |
| 51 |                                     |             |             |             |             |             |             |       |       |       |       |
| 52 |                                     |             |             |             |             |             |             |       |       |       |       |

Col Stats of Transpose of CXCL9

Row 1, A: RBCL



SourceDataforFigure5C — Edited

Prism 8

File Sheet Undo Clipboard Analysis Interpret Change Draw Write Text Export Print Send LA Help

Search

▼ Info Project info 1

- Project info 1
- New Info...

▼ Results

- Transpose of IL8
- Col Stats of IL8
- Transform of Transpose of IL8
- Mann-Whitney test of Transform of Transpose of IL8
- Ordinary one-way ANOVA of Transpose of IL8
- Transpose of CCL5
- Col Stats of Transpose of CCL5
- Transform of Transpose of CCL5
- Mann-Whitney test of Transform of Transpose of CCL5
- Ordinary one-way ANOVA of Transform of Transpose of CC
- Transpose of CXCL9**
- Col Stats of Transpose of CXCL9
- Transform of Transpose of CXCL9**
- Mann-Whitney test of Transform of Transpose of CXCL9

Family

- CXCL9**
  - Transpose
    - Transform**
      - Mann-Whitney test

|    |           | A      | B      | C     | D       | E        | F      | G     | H     | I     | J     | K     | L     |
|----|-----------|--------|--------|-------|---------|----------|--------|-------|-------|-------|-------|-------|-------|
|    | Transform | RBCL   | iRBCL  | LPS   | XO+RBCL | XO+iRBCL | XO+LPS | Title | Title | Title | Title | Title | Title |
|    |           | Y      | Y      | Y     | Y       | Y        | Y      | Y     | Y     | Y     | Y     | Y     | Y     |
| 1  | Donor 1   | -0.162 | -0.100 | 1.020 | 0.921   | 1.577    | 1.263  |       |       |       |       |       |       |
| 2  | Donor 2   | -0.198 | -0.077 | 1.966 | 1.600   | 2.658    | 1.668  |       |       |       |       |       |       |
| 3  | Donor 3   | 0.038  | 0.357  | 0.926 | -0.021  | 0.276    | 0.991  |       |       |       |       |       |       |
| 4  | Donor 4   | 0.642  | 0.009  | 1.188 | 0.647   | 1.936    | 1.080  |       |       |       |       |       |       |
| 5  |           |        |        |       |         |          |        |       |       |       |       |       |       |
| 6  |           |        |        |       |         |          |        |       |       |       |       |       |       |
| 7  |           |        |        |       |         |          |        |       |       |       |       |       |       |
| 8  |           |        |        |       |         |          |        |       |       |       |       |       |       |
| 9  |           |        |        |       |         |          |        |       |       |       |       |       |       |
| 10 |           |        |        |       |         |          |        |       |       |       |       |       |       |
| 11 |           |        |        |       |         |          |        |       |       |       |       |       |       |
| 12 |           |        |        |       |         |          |        |       |       |       |       |       |       |
| 13 |           |        |        |       |         |          |        |       |       |       |       |       |       |
| 14 |           |        |        |       |         |          |        |       |       |       |       |       |       |
| 15 |           |        |        |       |         |          |        |       |       |       |       |       |       |
| 16 |           |        |        |       |         |          |        |       |       |       |       |       |       |
| 17 |           |        |        |       |         |          |        |       |       |       |       |       |       |
| 18 |           |        |        |       |         |          |        |       |       |       |       |       |       |
| 19 |           |        |        |       |         |          |        |       |       |       |       |       |       |
| 20 |           |        |        |       |         |          |        |       |       |       |       |       |       |
| 21 |           |        |        |       |         |          |        |       |       |       |       |       |       |
| 22 |           |        |        |       |         |          |        |       |       |       |       |       |       |
| 23 |           |        |        |       |         |          |        |       |       |       |       |       |       |
| 24 |           |        |        |       |         |          |        |       |       |       |       |       |       |
| 25 |           |        |        |       |         |          |        |       |       |       |       |       |       |
| 26 |           |        |        |       |         |          |        |       |       |       |       |       |       |
| 27 |           |        |        |       |         |          |        |       |       |       |       |       |       |
| 28 |           |        |        |       |         |          |        |       |       |       |       |       |       |
| 29 |           |        |        |       |         |          |        |       |       |       |       |       |       |
| 30 |           |        |        |       |         |          |        |       |       |       |       |       |       |
| 31 |           |        |        |       |         |          |        |       |       |       |       |       |       |
| 32 |           |        |        |       |         |          |        |       |       |       |       |       |       |
| 33 |           |        |        |       |         |          |        |       |       |       |       |       |       |
| 34 |           |        |        |       |         |          |        |       |       |       |       |       |       |

Transform of Transpose of CXCL9 Row 1, A: RBCL

Transform: Y=Log(Y)

SourceDataforFigure5C — Edited

Prism 8

File Sheet Undo Clipboard Analysis Interpret Change Draw Write Text Export Print Send LA Help

10 Arial

Search

▼ Info Project info 1

Project info 1

New Info...

▼ Results

- Transpose of IL8
- Col Stats of IL8
- Transform of Transpose of IL8
- Mann-Whitney test of Transform of Transpose of IL8
- Ordinary one-way ANOVA of Transform of Transpose of IL8
- Transpose of CCL5
- Col Stats of Transpose of CCL5
- Transform of Transpose of CCL5
- Mann-Whitney test of Transform of Transpose of CCL5
- Ordinary one-way ANOVA of Transform of Transpose of CCL5
- Transpose of CXCL9**
- Col Stats of Transpose of CXCL9
- Transform of Transpose of CXCL9**
- Mann-Whitney test of Transform of Transpose of CXCL9**

Family

- CXCL9**
  - Transpose
    - Transform
      - Mann-Whitney test**

| Mann-Whitney test |                                     |
|-------------------|-------------------------------------|
| 1                 | Table Analyzed                      |
| 2                 |                                     |
| 3                 | Column D                            |
| 4                 | vs.                                 |
| 5                 | Column B                            |
| 6                 |                                     |
| 7                 | <b>Mann-Whitney test</b>            |
| 8                 | P value                             |
| 9                 | Exact or approximate P value?       |
| 10                | P value summary                     |
| 11                | Significantly different (P < 0.05)? |
| 12                | One- or two-tailed P value?         |
| 13                | Sum of ranks in column B,D          |
| 14                | Mann-Whitney U                      |
| 15                |                                     |
| 16                | <b>Difference between medians</b>   |
| 17                | Median of column B                  |
| 18                | Median of column D                  |
| 19                | Difference: Actual                  |
| 20                | Difference: Hodges-Lehmann          |
| 21                |                                     |
| 22                |                                     |
| 23                |                                     |
| 24                |                                     |
| 25                |                                     |
| 26                |                                     |
| 27                |                                     |
| 28                |                                     |
| 29                |                                     |
| 30                |                                     |
| 31                |                                     |
| 32                |                                     |
| 33                |                                     |
| 34                |                                     |

Transform of Transpose of CXCL9

XO+RBCL

vs.

iRBCL

0.1143

Exact

ns

No

Two-tailed

12 , 24

2

-0.03373, n=4

0.7841, n=4

0.8179

0.7353

Mann-Whitney test of Transform of Transpos

Row 1, Column A

SourceDataforFigure5C — Edited

File Sheet Undo Clipboard Analysis Interpret Change Draw Write Text Export Print Send LA Help

Prism 8

Search

ANOVA results Multiple comparisons

Results Stats of Transpose of CCL5

- Transform of Transpose of CCL5
- Mann-Whitney test of Transform of Transpose of CCL5
- Ordinary one-way ANOVA of Transform of Transpose of CCL5
- Transpose of CXCL9**
- Col Stats of Transpose of CXCL9
- Transform of Transpose of CXCL9
- Mann-Whitney test of Transform of Transpose of CXCL9
- Ordinary one-way ANOVA of Transpose of CXCL9
- Transpose of CCL2
- Col Stats of Transpose of CCL2
- Transform of Transpose of CCL2
- Mann-Whitney test of Transform of Transpose of CCL2
- Ordinary one-way ANOVA of Transform of Transpose of CCL2
- New Analysis...

Graphs

- IL8
- IL8 line

Family

- CXCL9**
  - Transpose
    - Ordinary one-way ANOVA**

| Ordinary one-way ANOVA |                                             |                    |           |           |                     |                |
|------------------------|---------------------------------------------|--------------------|-----------|-----------|---------------------|----------------|
| ANOVA results          |                                             |                    |           |           |                     |                |
| 1                      | Table Analyzed                              | Transpose of CXCL9 |           |           |                     |                |
| 2                      | Data sets analyzed                          | A-F                |           |           |                     |                |
| 3                      |                                             |                    |           |           |                     |                |
| 4                      | <b>ANOVA summary</b>                        |                    |           |           |                     |                |
| 5                      | F                                           | 1.566              |           |           |                     |                |
| 6                      | P value                                     | 0.2198             |           |           |                     |                |
| 7                      | P value summary                             | ns                 |           |           |                     |                |
| 8                      | Significant diff. among means (P < 0.05)?   | No                 |           |           |                     |                |
| 9                      | R square                                    | 0.3032             |           |           |                     |                |
| 10                     |                                             |                    |           |           |                     |                |
| 11                     | <b>Brown-Forsythe test</b>                  |                    |           |           |                     |                |
| 12                     | F (DFn, DFd)                                | 1.638 (5, 18)      |           |           |                     |                |
| 13                     | P value                                     | 0.2008             |           |           |                     |                |
| 14                     | P value summary                             | ns                 |           |           |                     |                |
| 15                     | Are SDs significantly different (P < 0.05)? | No                 |           |           |                     |                |
| 16                     |                                             |                    |           |           |                     |                |
| 17                     | <b>Bartlett's test</b>                      |                    |           |           |                     |                |
| 18                     | Bartlett's statistic (corrected)            | 62.89              |           |           |                     |                |
| 19                     | P value                                     | <0.0001            |           |           |                     |                |
| 20                     | P value summary                             | ****               |           |           |                     |                |
| 21                     | Are SDs significantly different (P < 0.05)? | Yes                |           |           |                     |                |
| 22                     |                                             |                    |           |           |                     |                |
| 23                     | <b>ANOVA table</b>                          | <b>SS</b>          | <b>DF</b> | <b>MS</b> | <b>F (DFn, DFd)</b> | <b>P value</b> |
| 24                     | Treatment (between columns)                 | 60213              | 5         | 12043     | F (5, 18) = 1.566   | P=0.2198       |
| 25                     | Residual (within columns)                   | 138407             | 18        | 7689      |                     |                |
| 26                     | Total                                       | 198620             | 23        |           |                     |                |
| 27                     |                                             |                    |           |           |                     |                |
| 28                     | <b>Data summary</b>                         |                    |           |           |                     |                |
| 29                     | Number of treatments (columns)              | 6                  |           |           |                     |                |
| 30                     | Number of values (total)                    | 24                 |           |           |                     |                |
| 31                     |                                             |                    |           |           |                     |                |
| 32                     |                                             |                    |           |           |                     |                |
| 33                     |                                             |                    |           |           |                     |                |

Ordinary one-way ANOVA of Transpose of CXCL9 Row 1, Column A

SourceDataforFigure5C — Edited

File Sheet Undo Clipboard Analysis Interpret Change Draw Write Text Export Print Send LA Help

Prism 8

Search

ANOVA results Multiple comparisons

Results Stats of Transpose of CCL5

- Transform of Transpose of CCL5
- Mann-Whitney test of Transform of Transpose of CCL5
- Ordinary one-way ANOVA of Transform of Transpose of CCL5
- Transpose of CXCL9
- Col Stats of Transpose of CXCL9
- Transform of Transpose of CXCL9
- Mann-Whitney test of Transform of Transpose of CXCL9
- Ordinary one-way ANOVA of Transpose of CXCL9
- Transpose of CCL2
- Col Stats of Transpose of CCL2
- Transform of Transpose of CCL2
- Mann-Whitney test of Transform of Transpose of CCL2
- Ordinary one-way ANOVA of Transform of Transpose of CCL2
- New Analysis...

Graphs

- IL8
- IL8 line

Family

- CXCL9
  - Transpose
    - Ordinary one-way ANOVA

| Ordinary one-way ANOVA            |                                  |            |                    |              |             |                  |     |         |    |
|-----------------------------------|----------------------------------|------------|--------------------|--------------|-------------|------------------|-----|---------|----|
| Multiple comparisons              |                                  |            |                    |              |             |                  |     |         |    |
| 1                                 | Number of families               | 1          |                    |              |             |                  |     |         |    |
| 2                                 | Number of comparisons per family | 15         |                    |              |             |                  |     |         |    |
| 3                                 | Alpha                            | 0.05       |                    |              |             |                  |     |         |    |
| 4                                 |                                  |            |                    |              |             |                  |     |         |    |
| Tukey's multiple comparisons test |                                  | Mean Diff. | 95.00% CI of diff. | Significant? | Summary     | Adjusted P Value |     |         |    |
| 6                                 | RBCL vs. iRBCL                   | 0.4684     | -196.6 to 197.5    | No           | ns          | >0.9999          | A-B |         |    |
| 7                                 | RBCL vs. LPS                     | -30.00     | -227.1 to 167.1    | No           | ns          | 0.9962           | A-C |         |    |
| 8                                 | RBCL vs. XO+RBCL                 | -11.69     | -208.7 to 185.4    | No           | ns          | >0.9999          | A-D |         |    |
| 9                                 | RBCL vs. XO+iRBCL                | -143.5     | -340.6 to 53.51    | No           | ns          | 0.2384           | A-E |         |    |
| 10                                | RBCL vs. XO+LPS                  | -19.98     | -217.0 to 177.1    | No           | ns          | 0.9995           | A-F |         |    |
| 11                                | iRBCL vs. LPS                    | -30.47     | -227.5 to 166.6    | No           | ns          | 0.9959           | B-C |         |    |
| 12                                | iRBCL vs. XO+RBCL                | -12.16     | -209.2 to 184.9    | No           | ns          | >0.9999          | B-D |         |    |
| 13                                | iRBCL vs. XO+iRBCL               | -144.0     | -341.1 to 53.05    | No           | ns          | 0.2356           | B-E |         |    |
| 14                                | iRBCL vs. XO+LPS                 | -20.44     | -217.5 to 176.6    | No           | ns          | 0.9994           | B-F |         |    |
| 15                                | LPS vs. XO+RBCL                  | 18.31      | -178.7 to 215.4    | No           | ns          | 0.9996           | C-D |         |    |
| 16                                | LPS vs. XO+iRBCL                 | -113.5     | -310.6 to 83.52    | No           | ns          | 0.4719           | C-E |         |    |
| 17                                | LPS vs. XO+LPS                   | 10.03      | -187.0 to 207.1    | No           | ns          | >0.9999          | C-F |         |    |
| 18                                | XO+RBCL vs. XO+iRBCL             | -131.8     | -328.9 to 65.21    | No           | ns          | 0.3179           | D-E |         |    |
| 19                                | XO+RBCL vs. XO+LPS               | -8.282     | -205.3 to 188.8    | No           | ns          | >0.9999          | D-F |         |    |
| 20                                | XO+iRBCL vs. XO+LPS              | 123.6      | -73.49 to 320.6    | No           | ns          | 0.3835           | E-F |         |    |
| 21                                |                                  |            |                    |              |             |                  |     |         |    |
| Test details                      |                                  | Mean 1     | Mean 2             | Mean Diff.   | SE of diff. | n1               | n2  | q       | DF |
| 23                                | RBCL vs. iRBCL                   | 1.701      | 1.233              | 0.4684       | 62.01       | 4                | 4   | 0.01068 | 18 |
| 24                                | RBCL vs. LPS                     | 1.701      | 31.70              | -30.00       | 62.01       | 4                | 4   | 0.6843  | 18 |
| 25                                | RBCL vs. XO+RBCL                 | 1.701      | 13.39              | -11.69       | 62.01       | 4                | 4   | 0.2667  | 18 |
| 26                                | RBCL vs. XO+iRBCL                | 1.701      | 145.2              | -143.5       | 62.01       | 4                | 4   | 3.274   | 18 |
| 27                                | RBCL vs. XO+LPS                  | 1.701      | 21.68              | -19.98       | 62.01       | 4                | 4   | 0.4556  | 18 |
| 28                                | iRBCL vs. LPS                    | 1.233      | 31.70              | -30.47       | 62.01       | 4                | 4   | 0.6950  | 18 |
| 29                                | iRBCL vs. XO+RBCL                | 1.233      | 13.39              | -12.16       | 62.01       | 4                | 4   | 0.2774  | 18 |
| 30                                | iRBCL vs. XO+iRBCL               | 1.233      | 145.2              | -144.0       | 62.01       | 4                | 4   | 3.285   | 18 |
| 31                                | iRBCL vs. XO+LPS                 | 1.233      | 21.68              | -20.44       | 62.01       | 4                | 4   | 0.4663  | 18 |
| 32                                | LPS vs. XO+RBCL                  | 31.70      | 13.39              | 18.31        | 62.01       | 4                | 4   | 0.4176  | 18 |
| 33                                | LPS vs. XO+iRBCL                 | 31.70      | 145.2              | -113.5       | 62.01       | 4                | 4   | 2.590   | 18 |

Ordinary one-way ANOVA of Transpose of CXCL9 Row 1, Column A

SourceDataforFigure5C — Edited

File Sheet Undo Clipboard Analysis Interpret Change Draw Write Text Export Print Send LA Help

Prism 8

Search

ANOVA results Multiple comparisons

Results Stats of Transpose of CCL5

- Transform of Transpose of CCL5
- Mann-Whitney test of Transform of Transpose of CCL5
- Ordinary one-way ANOVA of Transform of Transpose of CC
- Transpose of CXCL9**
- Col Stats of Transpose of CXCL9
- Transform of Transpose of CXCL9
- Mann-Whitney test of Transform of Transpose of CXCL9
- Ordinary one-way ANOVA of Transpose of CXCL9**
- Transpose of CCL2
- Col Stats of Transpose of CCL2
- Transform of Transpose of CCL2
- Mann-Whitney test of Transform of Transpose of CCL2
- Ordinary one-way ANOVA of Transform of Transpose of CC
- New Analysis...

Graphs

- IL8
- IL8 line

Family

- CXCL9**
- Transpose
- Ordinary one-way ANOVA**

|    |                      | Mean 1        | Mean 2          | Mean Diff.        | SE of diff.        | n1        | n2        | q        | DF        |
|----|----------------------|---------------|-----------------|-------------------|--------------------|-----------|-----------|----------|-----------|
| 17 | LPS vs. XO+LPS       | 10.03         | -187.0 to 207.1 | No                | ns                 | >0.9999   | C-F       |          |           |
| 18 | XO+RBCL vs. XO+IRBCL | -131.8        | -328.9 to 65.21 | No                | ns                 | 0.3179    | D-E       |          |           |
| 19 | XO+RBCL vs. XO+LPS   | -8.282        | -205.3 to 188.8 | No                | ns                 | >0.9999   | D-F       |          |           |
| 20 | XO+IRBCL vs. XO+LPS  | 123.6         | -73.49 to 320.6 | No                | ns                 | 0.3835    | E-F       |          |           |
| 21 |                      |               |                 |                   |                    |           |           |          |           |
| 22 | <b>Test details</b>  | <b>Mean 1</b> | <b>Mean 2</b>   | <b>Mean Diff.</b> | <b>SE of diff.</b> | <b>n1</b> | <b>n2</b> | <b>q</b> | <b>DF</b> |
| 23 | RBCL vs. iRBCL       | 1.701         | 1.233           | 0.4684            | 62.01              | 4         | 4         | 0.01068  | 18        |
| 24 | RBCL vs. LPS         | 1.701         | 31.70           | -30.00            | 62.01              | 4         | 4         | 0.6843   | 18        |
| 25 | RBCL vs. XO+RBCL     | 1.701         | 13.39           | -11.69            | 62.01              | 4         | 4         | 0.2667   | 18        |
| 26 | RBCL vs. XO+IRBCL    | 1.701         | 145.2           | -143.5            | 62.01              | 4         | 4         | 3.274    | 18        |
| 27 | RBCL vs. XO+LPS      | 1.701         | 21.68           | -19.98            | 62.01              | 4         | 4         | 0.4556   | 18        |
| 28 | iRBCL vs. LPS        | 1.233         | 31.70           | -30.47            | 62.01              | 4         | 4         | 0.6950   | 18        |
| 29 | iRBCL vs. XO+RBCL    | 1.233         | 13.39           | -12.16            | 62.01              | 4         | 4         | 0.2774   | 18        |
| 30 | iRBCL vs. XO+IRBCL   | 1.233         | 145.2           | -144.0            | 62.01              | 4         | 4         | 3.285    | 18        |
| 31 | iRBCL vs. XO+LPS     | 1.233         | 21.68           | -20.44            | 62.01              | 4         | 4         | 0.4663   | 18        |
| 32 | LPS vs. XO+RBCL      | 31.70         | 13.39           | 18.31             | 62.01              | 4         | 4         | 0.4176   | 18        |
| 33 | LPS vs. XO+IRBCL     | 31.70         | 145.2           | -113.5            | 62.01              | 4         | 4         | 2.590    | 18        |
| 34 | LPS vs. XO+LPS       | 31.70         | 21.68           | 10.03             | 62.01              | 4         | 4         | 0.2287   | 18        |
| 35 | XO+RBCL vs. XO+IRBCL | 13.39         | 145.2           | -131.8            | 62.01              | 4         | 4         | 3.007    | 18        |
| 36 | XO+RBCL vs. XO+LPS   | 13.39         | 21.68           | -8.282            | 62.01              | 4         | 4         | 0.1889   | 18        |
| 37 | XO+IRBCL vs. XO+LPS  | 145.2         | 21.68           | 123.6             | 62.01              | 4         | 4         | 2.818    | 18        |
| 38 |                      |               |                 |                   |                    |           |           |          |           |
| 39 |                      |               |                 |                   |                    |           |           |          |           |
| 40 |                      |               |                 |                   |                    |           |           |          |           |
| 41 |                      |               |                 |                   |                    |           |           |          |           |
| 42 |                      |               |                 |                   |                    |           |           |          |           |
| 43 |                      |               |                 |                   |                    |           |           |          |           |
| 44 |                      |               |                 |                   |                    |           |           |          |           |
| 45 |                      |               |                 |                   |                    |           |           |          |           |
| 46 |                      |               |                 |                   |                    |           |           |          |           |
| 47 |                      |               |                 |                   |                    |           |           |          |           |
| 48 |                      |               |                 |                   |                    |           |           |          |           |
| 49 |                      |               |                 |                   |                    |           |           |          |           |

Ordinary one-way ANOVA of Transpose of CX... Row 1, Column A

SourceDataforFigure5C — Edited

Prism 8

File Sheet Undo Clipboard Analysis Interpret Change Draw Write Text Export Print Send LA Help

Search

▼ Results Stats of Transpose of CCL5

- Transform of Transpose of CCL5
- Mann-Whitney test of Transform of Transpose of CCL5
- Ordinary one-way ANOVA of Transform of Transpose of CCL5
- Transpose of CXCL9
- Col Stats of Transpose of CXCL9
- Transform of Transpose of CXCL9
- Mann-Whitney test of Transform of Transpose of CXCL9
- Ordinary one-way ANOVA of Transform of Transpose of CXCL9
- Transpose of CCL2**
- Col Stats of Transpose of CCL2
- Transform of Transpose of CCL2
- Mann-Whitney test of Transform of Transpose of CCL2
- Ordinary one-way ANOVA of Transform of Transpose of CCL2
- New Analysis...

▼ Graphs

- IL8
- IL8 line

Family

- CCL2**
  - Transpose**
    - Col Stats
    - Transform
      - Mann-Whitney test
      - Ordinary one-way ANOVA

|    |           | A     | B     | C     | D       | E        | F      | G     | H     | I     | J     | K     | L     |
|----|-----------|-------|-------|-------|---------|----------|--------|-------|-------|-------|-------|-------|-------|
|    | Transpose | RBCL  | iRBCL | LPS   | XO+RBCL | XO+iRBCL | XO+LPS | Title | Title | Title | Title | Title | Title |
|    |           | Y     | Y     | Y     | Y       | Y        | Y      | Y     | Y     | Y     | Y     | Y     | Y     |
| 1  | Donor 1   | 1.078 | 3.003 | 3.920 | 5.865   | 230.158  | 5.473  |       |       |       |       |       |       |
| 2  | Donor 2   | 3.304 | 7.001 | 7.819 | 14.456  | 564.680  | 7.819  |       |       |       |       |       |       |
| 3  | Donor 3   | 0.911 | 4.278 | 1.531 | 3.442   | 59.615   | 1.995  |       |       |       |       |       |       |
| 4  | Donor 4   | 2.404 | 2.324 | 3.688 | 4.517   | 106.228  | 3.276  |       |       |       |       |       |       |
| 5  |           |       |       |       |         |          |        |       |       |       |       |       |       |
| 6  |           |       |       |       |         |          |        |       |       |       |       |       |       |
| 7  |           |       |       |       |         |          |        |       |       |       |       |       |       |
| 8  |           |       |       |       |         |          |        |       |       |       |       |       |       |
| 9  |           |       |       |       |         |          |        |       |       |       |       |       |       |
| 10 |           |       |       |       |         |          |        |       |       |       |       |       |       |
| 11 |           |       |       |       |         |          |        |       |       |       |       |       |       |
| 12 |           |       |       |       |         |          |        |       |       |       |       |       |       |
| 13 |           |       |       |       |         |          |        |       |       |       |       |       |       |
| 14 |           |       |       |       |         |          |        |       |       |       |       |       |       |
| 15 |           |       |       |       |         |          |        |       |       |       |       |       |       |
| 16 |           |       |       |       |         |          |        |       |       |       |       |       |       |
| 17 |           |       |       |       |         |          |        |       |       |       |       |       |       |
| 18 |           |       |       |       |         |          |        |       |       |       |       |       |       |
| 19 |           |       |       |       |         |          |        |       |       |       |       |       |       |
| 20 |           |       |       |       |         |          |        |       |       |       |       |       |       |
| 21 |           |       |       |       |         |          |        |       |       |       |       |       |       |
| 22 |           |       |       |       |         |          |        |       |       |       |       |       |       |
| 23 |           |       |       |       |         |          |        |       |       |       |       |       |       |
| 24 |           |       |       |       |         |          |        |       |       |       |       |       |       |
| 25 |           |       |       |       |         |          |        |       |       |       |       |       |       |
| 26 |           |       |       |       |         |          |        |       |       |       |       |       |       |
| 27 |           |       |       |       |         |          |        |       |       |       |       |       |       |
| 28 |           |       |       |       |         |          |        |       |       |       |       |       |       |
| 29 |           |       |       |       |         |          |        |       |       |       |       |       |       |
| 30 |           |       |       |       |         |          |        |       |       |       |       |       |       |
| 31 |           |       |       |       |         |          |        |       |       |       |       |       |       |
| 32 |           |       |       |       |         |          |        |       |       |       |       |       |       |
| 33 |           |       |       |       |         |          |        |       |       |       |       |       |       |
| 34 |           |       |       |       |         |          |        |       |       |       |       |       |       |

Transpose of CCL2

Row 1, A: RBCL

SourceDataforFigure5C — Edited

Prism 8

File Sheet Undo Clipboard Analysis Interpret Change Draw Write Text Export Print Send LA Help

Search

Results Stats of Transpose of CCL5

- Transform of Transpose of CCL5
- Mann-Whitney test of Transform of Transpose of CCL5
- Ordinary one-way ANOVA of Transform of Transpose of CCL5
- Transpose of CXCL9
- Col Stats of Transpose of CXCL9
- Transform of Transpose of CXCL9
- Mann-Whitney test of Transform of Transpose of CXCL9
- Ordinary one-way ANOVA of Transform of Transpose of CXCL9
- Transpose of CCL2
- Col Stats of Transpose of CCL2**
- Transform of Transpose of CCL2
- Mann-Whitney test of Transform of Transpose of CCL2
- Ordinary one-way ANOVA of Transform of Transpose of CCL2
- New Analysis...

Graphs

- IL8
- IL8 line

Family

- CCL2
  - Transpose
    - Col Stats**

| Col Stats |                                                | A           | B           | C           | D           | E           | F           | G     | H     | I     |
|-----------|------------------------------------------------|-------------|-------------|-------------|-------------|-------------|-------------|-------|-------|-------|
|           |                                                | RBCL        | iRBCL       | LPS         | XO+RBCL     | XO+iRBCL    | XO+LPS      | Title | Title | Title |
|           |                                                | Y           | Y           | Y           | Y           | Y           | Y           | Y     | Y     | Y     |
| 1         | Number of values                               | 4           | 4           | 4           | 4           | 4           | 4           |       |       |       |
| 2         |                                                |             |             |             |             |             |             |       |       |       |
| 3         | Minimum                                        | 0.9106      | 2.324       | 1.531       | 3.442       | 59.62       | 1.995       |       |       |       |
| 4         | 25% Percentile                                 | 0.9525      | 2.493       | 2.070       | 3.711       | 71.27       | 2.315       |       |       |       |
| 5         | Median                                         | 1.741       | 3.640       | 3.804       | 5.191       | 168.2       | 4.374       |       |       |       |
| 6         | 75% Percentile                                 | 3.079       | 6.321       | 6.845       | 12.31       | 481.0       | 7.233       |       |       |       |
| 7         | Maximum                                        | 3.304       | 7.001       | 7.819       | 14.46       | 564.7       | 7.819       |       |       |       |
| 8         |                                                |             |             |             |             |             |             |       |       |       |
| 9         | Mean                                           | 1.924       | 4.151       | 4.240       | 7.070       | 240.2       | 4.641       |       |       |       |
| 10        | Std. Deviation                                 | 1.137       | 2.066       | 2.618       | 5.023       | 228.0       | 2.560       |       |       |       |
| 11        | Std. Error of Mean                             | 0.5685      | 1.033       | 1.309       | 2.511       | 114.0       | 1.280       |       |       |       |
| 12        |                                                |             |             |             |             |             |             |       |       |       |
| 13        | Lower 95% CI of mean                           | 0.1151      | 0.8648      | 0.07440     | -0.9227     | -122.6      | 0.5673      |       |       |       |
| 14        | Upper 95% CI of mean                           | 3.733       | 7.438       | 8.405       | 15.06       | 603.0       | 8.714       |       |       |       |
| 15        |                                                |             |             |             |             |             |             |       |       |       |
| 16        | Sum                                            | 7.697       | 16.61       | 16.96       | 28.28       | 960.7       | 18.56       |       |       |       |
| 17        |                                                |             |             |             |             |             |             |       |       |       |
| 18        | <b>D'Agostino &amp; Pearson normality test</b> |             |             |             |             |             |             |       |       |       |
| 19        | K2                                             | N too small | N too small | N too small | N too small | N too small | N too small |       |       |       |
| 20        | P value                                        |             |             |             |             |             |             |       |       |       |
| 21        | Passed normality test (alpha=0.05)?            |             |             |             |             |             |             |       |       |       |
| 22        | P value summary                                |             |             |             |             |             |             |       |       |       |
| 23        |                                                |             |             |             |             |             |             |       |       |       |
| 24        | <b>Shapiro-Wilk normality test</b>             |             |             |             |             |             |             |       |       |       |
| 25        | W                                              | 0.8975      | 0.9176      | 0.9249      | 0.8026      | 0.8671      | 0.9707      |       |       |       |
| 26        | P value                                        | 0.4189      | 0.5236      | 0.5646      | 0.1069      | 0.2865      | 0.8455      |       |       |       |
| 27        | Passed normality test (alpha=0.05)?            | Yes         | Yes         | Yes         | Yes         | Yes         | Yes         |       |       |       |
| 28        | P value summary                                | ns          | ns          | ns          | ns          | ns          | ns          |       |       |       |
| 29        |                                                |             |             |             |             |             |             |       |       |       |
| 30        | <b>KS normality test</b>                       |             |             |             |             |             |             |       |       |       |
| 31        | KS distance                                    | N too small | N too small | N too small | N too small | N too small | N too small |       |       |       |
| 32        | P value                                        |             |             |             |             |             |             |       |       |       |
| 33        | Passed normality test (alpha=0.05)?            |             |             |             |             |             |             |       |       |       |
| 34        | P value summary                                |             |             |             |             |             |             |       |       |       |

Col Stats of Transpose of CCL2

Row 1, A: RBCL

SourceDataforFigure5C — Edited

Prism 8

File Sheet Undo Clipboard Analysis Interpret Change Draw Write Text Export Print Send LA Help

Search

▼ Results Stats of Transpose of CCL5

- Transform of Transpose of CCL5
- Mann-Whitney test of Transform of Transpose of CCL5
- Ordinary one-way ANOVA of Transform of Transpose of CCL5
- Transpose of CXCL9
- Col Stats of Transpose of CXCL9
- Transform of Transpose of CXCL9
- Mann-Whitney test of Transform of Transpose of CXCL9
- Ordinary one-way ANOVA of Transform of Transpose of CXCL9
- Transpose of CCL2**
- Col Stats of Transpose of CCL2
- Transform of Transpose of CCL2**
- Mann-Whitney test of Transform of Transpose of CCL2
- Ordinary one-way ANOVA of Transform of Transpose of CCL2
- New Analysis...

▼ Graphs

- IL8
- IL8 line

Family

- CCL2**
  - Transpose**
    - Transform**
    - Mann-Whitney test
    - Ordinary one-way ANOVA

|    |         | A      | B     | C     | D       | E        | F      | G     | H     | I     | J     | K     | L     |
|----|---------|--------|-------|-------|---------|----------|--------|-------|-------|-------|-------|-------|-------|
|    |         | RBCL   | iRBCL | LPS   | XO+RBCL | XO+iRBCL | XO+LPS | Title | Title | Title | Title | Title | Title |
|    |         | Y      | Y     | Y     | Y       | Y        | Y      | Y     | Y     | Y     | Y     | Y     | Y     |
| 1  | Donor 1 | 0.033  | 0.477 | 0.593 | 0.768   | 2.362    | 0.738  |       |       |       |       |       |       |
| 2  | Donor 2 | 0.519  | 0.845 | 0.893 | 1.160   | 2.752    | 0.893  |       |       |       |       |       |       |
| 3  | Donor 3 | -0.041 | 0.631 | 0.185 | 0.537   | 1.775    | 0.300  |       |       |       |       |       |       |
| 4  | Donor 4 | 0.381  | 0.366 | 0.567 | 0.655   | 2.026    | 0.515  |       |       |       |       |       |       |
| 5  |         |        |       |       |         |          |        |       |       |       |       |       |       |
| 6  |         |        |       |       |         |          |        |       |       |       |       |       |       |
| 7  |         |        |       |       |         |          |        |       |       |       |       |       |       |
| 8  |         |        |       |       |         |          |        |       |       |       |       |       |       |
| 9  |         |        |       |       |         |          |        |       |       |       |       |       |       |
| 10 |         |        |       |       |         |          |        |       |       |       |       |       |       |
| 11 |         |        |       |       |         |          |        |       |       |       |       |       |       |
| 12 |         |        |       |       |         |          |        |       |       |       |       |       |       |
| 13 |         |        |       |       |         |          |        |       |       |       |       |       |       |
| 14 |         |        |       |       |         |          |        |       |       |       |       |       |       |
| 15 |         |        |       |       |         |          |        |       |       |       |       |       |       |
| 16 |         |        |       |       |         |          |        |       |       |       |       |       |       |
| 17 |         |        |       |       |         |          |        |       |       |       |       |       |       |
| 18 |         |        |       |       |         |          |        |       |       |       |       |       |       |
| 19 |         |        |       |       |         |          |        |       |       |       |       |       |       |
| 20 |         |        |       |       |         |          |        |       |       |       |       |       |       |
| 21 |         |        |       |       |         |          |        |       |       |       |       |       |       |
| 22 |         |        |       |       |         |          |        |       |       |       |       |       |       |
| 23 |         |        |       |       |         |          |        |       |       |       |       |       |       |
| 24 |         |        |       |       |         |          |        |       |       |       |       |       |       |
| 25 |         |        |       |       |         |          |        |       |       |       |       |       |       |
| 26 |         |        |       |       |         |          |        |       |       |       |       |       |       |
| 27 |         |        |       |       |         |          |        |       |       |       |       |       |       |
| 28 |         |        |       |       |         |          |        |       |       |       |       |       |       |
| 29 |         |        |       |       |         |          |        |       |       |       |       |       |       |
| 30 |         |        |       |       |         |          |        |       |       |       |       |       |       |
| 31 |         |        |       |       |         |          |        |       |       |       |       |       |       |
| 32 |         |        |       |       |         |          |        |       |       |       |       |       |       |
| 33 |         |        |       |       |         |          |        |       |       |       |       |       |       |
| 34 |         |        |       |       |         |          |        |       |       |       |       |       |       |

Transform of Transpose of CCL2 Row 1, A: RBCL



SourceDataforFigure5C — Edited

Prism 8

File Sheet Undo Clipboard Analysis Interpret Change Draw Write Text Export Print Send LA Help

Search

Results Stats of Transpose of CCL5

- Transform of Transpose of CCL5
- Mann-Whitney test of Transform of Transpose of CCL5
- Ordinary one-way ANOVA of Transform of Transpose of CC
- Transpose of CXCL9
- Col Stats of Transpose of CXCL9
- Transform of Transpose of CXCL9
- Mann-Whitney test of Transform of Transpose of CXCL9
- Ordinary one-way ANOVA of Transform of Transpose of CXCL9
- Transpose of CCL2**
- Col Stats of Transpose of CCL2
- Transform of Transpose of CCL2**
- Mann-Whitney test of Transform of Transpose of CCL2**
- Ordinary one-way ANOVA of Transform of Transpose of CC
- New Analysis...

Graphs

- IL8
- IL8 line

Family

- CCL2**
  - Transpose
    - Transform
      - Mann-Whitney test**

| Mann-Whitney test |                                     |
|-------------------|-------------------------------------|
| 1                 | Table Analyzed                      |
| 2                 |                                     |
| 3                 | Column D                            |
| 4                 | vs.                                 |
| 5                 | Column B                            |
| 6                 |                                     |
| 7                 | <b>Mann-Whitney test</b>            |
| 8                 | P value                             |
| 9                 | Exact or approximate P value?       |
| 10                | P value summary                     |
| 11                | Significantly different (P < 0.05)? |
| 12                | One- or two-tailed P value?         |
| 13                | Sum of ranks in column B,D          |
| 14                | Mann-Whitney U                      |
| 15                |                                     |
| 16                | <b>Difference between medians</b>   |
| 17                | Median of column B                  |
| 18                | Median of column D                  |
| 19                | Difference: Actual                  |
| 20                | Difference: Hodges-Lehmann          |
| 21                |                                     |
| 22                |                                     |
| 23                |                                     |
| 24                |                                     |
| 25                |                                     |
| 26                |                                     |
| 27                |                                     |
| 28                |                                     |
| 29                |                                     |
| 30                |                                     |
| 31                |                                     |
| 32                |                                     |
| 33                |                                     |
| 34                |                                     |

Mann-Whitney test of Transform of Transpos

Row 1, Column A

SourceDataforFigure5C — Edited

Prism 8

File Sheet Undo Clipboard Analysis Interpret Change Draw Write Text Export Print Send LA Help

10 Arial

Search

Results Stats of Transpose of CCL5

- Transform of Transpose of CCL5
- Mann-Whitney test of Transform of Transpose of CCL5
- Ordinary one-way ANOVA of Transform of Transpose of CC
- Transpose of CXCL9
- Col Stats of Transpose of CXCL9
- Transform of Transpose of CXCL9
- Mann-Whitney test of Transform of Transpose of CXCL9
- Ordinary one-way ANOVA of Transform of Transpose of CXCL9
- Transpose of CCL2**
- Col Stats of Transpose of CCL2
- Transform of Transpose of CCL2**
- Mann-Whitney test of Transform of Transpose of CCL2**
- Ordinary one-way ANOVA of Transform of Transpose of CC
- New Analysis...

Graphs

- IL8
- IL8 line

Family

- CCL2**
  - Transpose
    - Transform
      - Mann-Whitney test**

| Mann-Whitney test |                                     |                                |
|-------------------|-------------------------------------|--------------------------------|
| 1                 | Table Analyzed                      | Transform of Transpose of CCL2 |
| 2                 |                                     |                                |
| 3                 | Column D                            | XO+RBCL                        |
| 4                 | vs.                                 | vs.                            |
| 5                 | Column B                            | iRBCL                          |
| 6                 |                                     |                                |
| 7                 | <b>Mann-Whitney test</b>            |                                |
| 8                 | P value                             | 0.3429                         |
| 9                 | Exact or approximate P value?       | Exact                          |
| 10                | P value summary                     | ns                             |
| 11                | Significantly different (P < 0.05)? | No                             |
| 12                | One- or two-tailed P value?         | Two-tailed                     |
| 13                | Sum of ranks in column B,D          | 14 , 22                        |
| 14                | Mann-Whitney U                      | 4                              |
| 15                |                                     |                                |
| 16                | <b>Difference between medians</b>   |                                |
| 17                | Median of column B                  | 0.5544, n=4                    |
| 18                | Median of column D                  | 0.7115, n=4                    |
| 19                | Difference: Actual                  | 0.1572                         |
| 20                | Difference: Hodges-Lehmann          | 0.1740                         |
| 21                |                                     |                                |
| 22                |                                     |                                |
| 23                |                                     |                                |
| 24                |                                     |                                |
| 25                |                                     |                                |
| 26                |                                     |                                |
| 27                |                                     |                                |
| 28                |                                     |                                |
| 29                |                                     |                                |
| 30                |                                     |                                |
| 31                |                                     |                                |
| 32                |                                     |                                |
| 33                |                                     |                                |
| 34                |                                     |                                |

Mann-Whitney test of Transform of Transpos Row 1, Column A

SourceDataforFigure5C — Edited

File Sheet Undo Clipboard Analysis Interpret Change Draw Write Text Export Print Send LA Help

Prism 8

Search

ANOVA results Multiple comparisons

Results Stats of Transpose of CCL5

- Transform of Transpose of CCL5
- Mann-Whitney test of Transform of Transpose of CCL5
- Ordinary one-way ANOVA of Transform of Transpose of CCL5
- Transpose of CXCL9
- Col Stats of Transpose of CXCL9
- Transform of Transpose of CXCL9
- Mann-Whitney test of Transform of Transpose of CXCL9
- Ordinary one-way ANOVA of Transform of Transpose of CXCL9
- Transpose of CCL2
- Col Stats of Transpose of CCL2
- Transform of Transpose of CCL2
- Mann-Whitney test of Transform of Transpose of CCL2
- Ordinary one-way ANOVA of Transform of Transpose of CCL2
- New Analysis...

Graphs

- IL8
- IL8 line

Family

- CCL2
  - Transpose
    - Transform
      - Ordinary one-way ANOVA

| Ordinary one-way ANOVA |                                             | ANOVA results                  |           |           |                     |                |
|------------------------|---------------------------------------------|--------------------------------|-----------|-----------|---------------------|----------------|
| 1                      | Table Analyzed                              | Transform of Transpose of CCL2 |           |           |                     |                |
| 2                      | Data sets analyzed                          | A-F                            |           |           |                     |                |
| 3                      |                                             |                                |           |           |                     |                |
| 4                      | <b>ANOVA summary</b>                        |                                |           |           |                     |                |
| 5                      | F                                           | 23.19                          |           |           |                     |                |
| 6                      | P value                                     | <0.0001                        |           |           |                     |                |
| 7                      | P value summary                             | ****                           |           |           |                     |                |
| 8                      | Significant diff. among means (P < 0.05)?   | Yes                            |           |           |                     |                |
| 9                      | R square                                    | 0.8656                         |           |           |                     |                |
| 10                     |                                             |                                |           |           |                     |                |
| 11                     | <b>Brown-Forsythe test</b>                  |                                |           |           |                     |                |
| 12                     | F (DFn, DFd)                                | 0.6310 (5, 18)                 |           |           |                     |                |
| 13                     | P value                                     | 0.6786                         |           |           |                     |                |
| 14                     | P value summary                             | ns                             |           |           |                     |                |
| 15                     | Are SDs significantly different (P < 0.05)? | No                             |           |           |                     |                |
| 16                     |                                             |                                |           |           |                     |                |
| 17                     | <b>Bartlett's test</b>                      |                                |           |           |                     |                |
| 18                     | Bartlett's statistic (corrected)            | 1.584                          |           |           |                     |                |
| 19                     | P value                                     | 0.9032                         |           |           |                     |                |
| 20                     | P value summary                             | ns                             |           |           |                     |                |
| 21                     | Are SDs significantly different (P < 0.05)? | No                             |           |           |                     |                |
| 22                     |                                             |                                |           |           |                     |                |
| 23                     | <b>ANOVA table</b>                          | <b>SS</b>                      | <b>DF</b> | <b>MS</b> | <b>F (DFn, DFd)</b> | <b>P value</b> |
| 24                     | Treatment (between columns)                 | 10.04                          | 5         | 2.009     | F (5, 18) = 23.19   | P<0.0001       |
| 25                     | Residual (within columns)                   | 1.559                          | 18        | 0.08663   |                     |                |
| 26                     | Total                                       | 11.60                          | 23        |           |                     |                |
| 27                     |                                             |                                |           |           |                     |                |
| 28                     | <b>Data summary</b>                         |                                |           |           |                     |                |
| 29                     | Number of treatments (columns)              | 6                              |           |           |                     |                |
| 30                     | Number of values (total)                    | 24                             |           |           |                     |                |
| 31                     |                                             |                                |           |           |                     |                |
| 32                     |                                             |                                |           |           |                     |                |
| 33                     |                                             |                                |           |           |                     |                |

Ordinary one-way ANOVA of Transform of Tr Row 1, Column A

SourceDataforFigure5C — Edited

File Sheet Undo Clipboard Analysis Interpret Change Draw Write Text Export Print Send LA Help

Prism 8

Search

ANOVA results Multiple comparisons

Results Stats of Transpose of CCL5

- Transform of Transpose of CCL5
- Mann-Whitney test of Transpose of Transpose of CCL5
- Ordinary one-way ANOVA of Transform of Transpose of CCL5
- Transpose of CXCL9
- Col Stats of Transpose of CXCL9
- Transform of Transpose of CXCL9
- Mann-Whitney test of Transform of Transpose of CXCL9
- Ordinary one-way ANOVA of Transpose of CXCL9
- Transpose of CCL2
- Col Stats of Transpose of CCL2
- Transform of Transpose of CCL2
- Mann-Whitney test of Transform of Transpose of CCL2
- Ordinary one-way ANOVA of Transform of Transpose of CCL2

Graphs

- IL8
- IL8 line

Family

- CCL2
  - Transpose
    - Transform
      - Ordinary one-way ANOVA

| Ordinary one-way ANOVA       |                               |            |                    |              |             |                  |     |        |    |
|------------------------------|-------------------------------|------------|--------------------|--------------|-------------|------------------|-----|--------|----|
| Multiple comparisons         |                               |            |                    |              |             |                  |     |        |    |
| 1                            | Number of families            | 1          |                    |              |             |                  |     |        |    |
| 2                            | Number of comparisons per fam | 15         |                    |              |             |                  |     |        |    |
| 3                            | Alpha                         | 0.05       |                    |              |             |                  |     |        |    |
| 4                            |                               |            |                    |              |             |                  |     |        |    |
| Tukey's multiple comparisons |                               | Mean Diff. | 95.00% CI of diff. | Significant? | Summary     | Adjusted P Value |     |        |    |
| 6                            | RBCL vs. iRBCL                | -0.3570    | -1.018 to 0.3044   | No           | ns          | 0.5395           | A-B |        |    |
| 7                            | RBCL vs. LPS                  | -0.3366    | -0.9980 to 0.3248  | No           | ns          | 0.5984           | A-C |        |    |
| 8                            | RBCL vs. XO+RBCL              | -0.5570    | -1.218 to 0.1044   | No           | ns          | 0.1292           | A-D |        |    |
| 9                            | RBCL vs. XO+iRBCL             | -2.006     | -2.667 to -1.344   | Yes          | ****        | <0.0001          | A-E |        |    |
| 10                           | RBCL vs. XO+LPS               | -0.3887    | -1.050 to 0.2728   | No           | ns          | 0.4513           | A-F |        |    |
| 11                           | iRBCL vs. LPS                 | 0.02046    | -0.6410 to 0.6819  | No           | ns          | >0.9999          | B-C |        |    |
| 12                           | iRBCL vs. XO+RBCL             | -0.1999    | -0.8614 to 0.4615  | No           | ns          | 0.9245           | B-D |        |    |
| 13                           | iRBCL vs. XO+iRBCL            | -1.649     | -2.310 to -0.9874  | Yes          | ****        | <0.0001          | B-E |        |    |
| 14                           | iRBCL vs. XO+LPS              | -0.03162   | -0.6930 to 0.6298  | No           | ns          | >0.9999          | B-F |        |    |
| 15                           | LPS vs. XO+RBCL               | -0.2204    | -0.8818 to 0.4410  | No           | ns          | 0.8911           | C-D |        |    |
| 16                           | LPS vs. XO+iRBCL              | -1.669     | -2.331 to -1.008   | Yes          | ****        | <0.0001          | C-E |        |    |
| 17                           | LPS vs. XO+LPS                | -0.05208   | -0.7135 to 0.6093  | No           | ns          | 0.9998           | C-F |        |    |
| 18                           | XO+RBCL vs. XO+iRBCL          | -1.449     | -2.110 to -0.7874  | Yes          | ****        | <0.0001          | D-E |        |    |
| 19                           | XO+RBCL vs. XO+LPS            | 0.1683     | -0.4931 to 0.8298  | No           | ns          | 0.9622           | D-F |        |    |
| 20                           | XO+iRBCL vs. XO+LPS           | 1.617      | 0.9558 to 2.279    | Yes          | ****        | <0.0001          | E-F |        |    |
| 21                           |                               |            |                    |              |             |                  |     |        |    |
| Test details                 |                               | Mean 1     | Mean 2             | Mean Diff.   | SE of diff. | n1               | n2  | q      | DF |
| 23                           | RBCL vs. iRBCL                | 0.2230     | 0.5800             | -0.3570      | 0.2081      | 4                | 4   | 2.426  | 18 |
| 24                           | RBCL vs. LPS                  | 0.2230     | 0.5596             | -0.3366      | 0.2081      | 4                | 4   | 2.287  | 18 |
| 25                           | RBCL vs. XO+RBCL              | 0.2230     | 0.7800             | -0.5570      | 0.2081      | 4                | 4   | 3.785  | 18 |
| 26                           | RBCL vs. XO+iRBCL             | 0.2230     | 2.229              | -2.006       | 0.2081      | 4                | 4   | 13.63  | 18 |
| 27                           | RBCL vs. XO+LPS               | 0.2230     | 0.6117             | -0.3887      | 0.2081      | 4                | 4   | 2.641  | 18 |
| 28                           | iRBCL vs. LPS                 | 0.5800     | 0.5596             | 0.02046      | 0.2081      | 4                | 4   | 0.1390 | 18 |
| 29                           | iRBCL vs. XO+RBCL             | 0.5800     | 0.7800             | -0.1999      | 0.2081      | 4                | 4   | 1.359  | 18 |
| 30                           | iRBCL vs. XO+iRBCL            | 0.5800     | 2.229              | -1.649       | 0.2081      | 4                | 4   | 11.20  | 18 |
| 31                           | iRBCL vs. XO+LPS              | 0.5800     | 0.6117             | -0.03162     | 0.2081      | 4                | 4   | 0.2149 | 18 |
| 32                           | LPS vs. XO+RBCL               | 0.5596     | 0.7800             | -0.2204      | 0.2081      | 4                | 4   | 1.498  | 18 |
| 33                           | LPS vs. XO+iRBCL              | 0.5596     | 2.229              | -1.669       | 0.2081      | 4                | 4   | 11.34  | 18 |

Ordinary one-way ANOVA of Transform of Tr Row 1, Column A

SourceDataforFigure5C — Edited

File Sheet Undo Clipboard Analysis Interpret Change Draw Write Text Export Print Send LA Help

Prism 8

Search

ANOVA results Multiple comparisons

Results Stats of Transpose of CCL5

- Transform of Transpose of CCL5
- Mann-Whitney test of Transform of Transpose of CCL5
- Ordinary one-way ANOVA of Transform of Transpose of CCL5
- Transpose of CXCL9
- Col Stats of Transpose of CXCL9
- Transform of Transpose of CXCL9
- Mann-Whitney test of Transform of Transpose of CXCL9
- Ordinary one-way ANOVA of Transform of Transpose of CXCL9
- Transpose of CCL2
- Col Stats of Transpose of CCL2
- Transform of Transpose of CCL2
- Mann-Whitney test of Transform of Transpose of CCL2
- Ordinary one-way ANOVA of Transform of Transpose of CCL2
- New Analysis...

Graphs

- IL8
- IL8 line

Family

- CCL2
  - Transpose
    - Transform
      - Ordinary one-way ANOVA

| Ordinary one-way ANOVA |                      | Multiple comparisons |                   |                   |                    |           |           |          |           |
|------------------------|----------------------|----------------------|-------------------|-------------------|--------------------|-----------|-----------|----------|-----------|
| 14                     | iRBCL vs. XO+LPS     | -0.03162             | -0.6930 to 0.6298 | No                | ns                 | >0.9999   | B-F       |          |           |
| 15                     | LPS vs. XO+RBCL      | -0.2204              | -0.8818 to 0.4410 | No                | ns                 | 0.8911    | C-D       |          |           |
| 16                     | LPS vs. XO+iRBCL     | -1.669               | -2.331 to -1.008  | Yes               | ****               | <0.0001   | C-E       |          |           |
| 17                     | LPS vs. XO+LPS       | -0.05208             | -0.7135 to 0.6093 | No                | ns                 | 0.9998    | C-F       |          |           |
| 18                     | XO+RBCL vs. XO+iRBCL | -1.449               | -2.110 to -0.7874 | Yes               | ****               | <0.0001   | D-E       |          |           |
| 19                     | XO+RBCL vs. XO+LPS   | 0.1683               | -0.4931 to 0.8298 | No                | ns                 | 0.9622    | D-F       |          |           |
| 20                     | XO+iRBCL vs. XO+LPS  | 1.617                | 0.9558 to 2.279   | Yes               | ****               | <0.0001   | E-F       |          |           |
| 21                     |                      |                      |                   |                   |                    |           |           |          |           |
| 22                     | <b>Test details</b>  | <b>Mean 1</b>        | <b>Mean 2</b>     | <b>Mean Diff.</b> | <b>SE of diff.</b> | <b>n1</b> | <b>n2</b> | <b>q</b> | <b>DF</b> |
| 23                     | RBCL vs. iRBCL       | 0.2230               | 0.5800            | -0.3570           | 0.2081             | 4         | 4         | 2.426    | 18        |
| 24                     | RBCL vs. LPS         | 0.2230               | 0.5596            | -0.3366           | 0.2081             | 4         | 4         | 2.287    | 18        |
| 25                     | RBCL vs. XO+RBCL     | 0.2230               | 0.7800            | -0.5570           | 0.2081             | 4         | 4         | 3.785    | 18        |
| 26                     | RBCL vs. XO+iRBCL    | 0.2230               | 2.229             | -2.006            | 0.2081             | 4         | 4         | 13.63    | 18        |
| 27                     | RBCL vs. XO+LPS      | 0.2230               | 0.6117            | -0.3887           | 0.2081             | 4         | 4         | 2.641    | 18        |
| 28                     | iRBCL vs. LPS        | 0.5800               | 0.5596            | 0.02046           | 0.2081             | 4         | 4         | 0.1390   | 18        |
| 29                     | iRBCL vs. XO+RBCL    | 0.5800               | 0.7800            | -0.1999           | 0.2081             | 4         | 4         | 1.359    | 18        |
| 30                     | iRBCL vs. XO+iRBCL   | 0.5800               | 2.229             | -1.649            | 0.2081             | 4         | 4         | 11.20    | 18        |
| 31                     | iRBCL vs. XO+LPS     | 0.5800               | 0.6117            | -0.03162          | 0.2081             | 4         | 4         | 0.2149   | 18        |
| 32                     | LPS vs. XO+RBCL      | 0.5596               | 0.7800            | -0.2204           | 0.2081             | 4         | 4         | 1.498    | 18        |
| 33                     | LPS vs. XO+iRBCL     | 0.5596               | 2.229             | -1.669            | 0.2081             | 4         | 4         | 11.34    | 18        |
| 34                     | LPS vs. XO+LPS       | 0.5596               | 0.6117            | -0.05208          | 0.2081             | 4         | 4         | 0.3539   | 18        |
| 35                     | XO+RBCL vs. XO+iRBCL | 0.7800               | 2.229             | -1.449            | 0.2081             | 4         | 4         | 9.845    | 18        |
| 36                     | XO+RBCL vs. XO+LPS   | 0.7800               | 0.6117            | 0.1683            | 0.2081             | 4         | 4         | 1.144    | 18        |
| 37                     | XO+iRBCL vs. XO+LPS  | 2.229                | 0.6117            | 1.617             | 0.2081             | 4         | 4         | 10.99    | 18        |
| 38                     |                      |                      |                   |                   |                    |           |           |          |           |
| 39                     |                      |                      |                   |                   |                    |           |           |          |           |
| 40                     |                      |                      |                   |                   |                    |           |           |          |           |
| 41                     |                      |                      |                   |                   |                    |           |           |          |           |
| 42                     |                      |                      |                   |                   |                    |           |           |          |           |
| 43                     |                      |                      |                   |                   |                    |           |           |          |           |
| 44                     |                      |                      |                   |                   |                    |           |           |          |           |
| 45                     |                      |                      |                   |                   |                    |           |           |          |           |
| 46                     |                      |                      |                   |                   |                    |           |           |          |           |

Ordinary one-way ANOVA of Transform of Tr... Row 1, Column A
