# Supplementary material for: Malaria inflammation by xanthine oxidase‐produced reactive oxygen species
Source: PubMed Central journal article supplement (PMC6685105; doi:10.15252/emmm.201809903), 2019-07-02
Supplement: EMMM-11-e9903-s007.pdf [file EMMM-11-e9903-s007.pdf]

SourceDataforFigure6A

Prism 8

File Sheet Undo Clipboard Analysis Change Import Draw Write Text Export Print Send LA Help

12 Helvetica

Search

▼ Data Tables

- irbc cytokines
- xo + rbc cytokines
- xo + irbcL cytokines
- New Data Table...

▼ Info

- New Info...

▼ Results

- New Analysis...

▼ Graphs

- irbc cytokines
- xo + rbc cytokines
- xo + irbcL cytokines
- New Graph...

▼ Layouts

- New Layout...

Family

- irbc cytokines
- irbc cytokines

|    | Table format:<br>Grouped | Group A    |         | Group B |      | Group C |      | Group D |      | Group E |      | Group F |      | Group G |      |
|----|--------------------------|------------|---------|---------|------|---------|------|---------|------|---------|------|---------|------|---------|------|
|    |                          | Data Set-A |         | Title   |      | Title   |      | Title   |      | Title   |      | Title   |      | Title   |      |
|    |                          | A:Y1       | A:Y2    | B:Y1    | B:Y2 | C:Y1    | C:Y2 | D:Y1    | D:Y2 | E:Y1    | E:Y2 | F:Y1    | F:Y2 | G:Y1    | G:Y2 |
| 1  | TNF                      | -1.0168    | 1.4593  |         |      |         |      |         |      |         |      |         |      |         |      |
| 2  | CXCL8                    | 1.1584     | -1.3612 |         |      |         |      |         |      |         |      |         |      |         |      |
| 3  | IL18                     | 1.5380     | -1.1173 |         |      |         |      |         |      |         |      |         |      |         |      |
| 4  | IL17A                    | 1.0481     | -1.1173 |         |      |         |      |         |      |         |      |         |      |         |      |
| 5  | IL13                     | 1.0481     | -1.1173 |         |      |         |      |         |      |         |      |         |      |         |      |
| 6  | IL10                     | 1.7894     | -1.1173 |         |      |         |      |         |      |         |      |         |      |         |      |
| 7  | IL6                      | -2.1296    | -1.8562 |         |      |         |      |         |      |         |      |         |      |         |      |
| 8  | IL5                      | 1.0481     | -1.1173 |         |      |         |      |         |      |         |      |         |      |         |      |
| 9  | IL4                      | 1.0481     | -1.1173 |         |      |         |      |         |      |         |      |         |      |         |      |
| 10 | IL2                      | 1.0481     | -1.1173 |         |      |         |      |         |      |         |      |         |      |         |      |
| 11 | IL1R1                    | -2.1809    | 1.4937  |         |      |         |      |         |      |         |      |         |      |         |      |
| 12 | IL1B                     | 2.2392     | -1.7822 |         |      |         |      |         |      |         |      |         |      |         |      |
| 13 | IL1A                     | -1.1755    | -1.0373 |         |      |         |      |         |      |         |      |         |      |         |      |
| 14 | Title                    |            |         |         |      |         |      |         |      |         |      |         |      |         |      |
| 15 | Title                    |            |         |         |      |         |      |         |      |         |      |         |      |         |      |
| 16 | Title                    |            |         |         |      |         |      |         |      |         |      |         |      |         |      |
| 17 | Title                    |            |         |         |      |         |      |         |      |         |      |         |      |         |      |
| 18 | Title                    |            |         |         |      |         |      |         |      |         |      |         |      |         |      |
| 19 | Title                    |            |         |         |      |         |      |         |      |         |      |         |      |         |      |
| 20 | Title                    |            |         |         |      |         |      |         |      |         |      |         |      |         |      |
| 21 | Title                    |            |         |         |      |         |      |         |      |         |      |         |      |         |      |
| 22 | Title                    |            |         |         |      |         |      |         |      |         |      |         |      |         |      |
| 23 | Title                    |            |         |         |      |         |      |         |      |         |      |         |      |         |      |
| 24 | Title                    |            |         |         |      |         |      |         |      |         |      |         |      |         |      |
| 25 | Title                    |            |         |         |      |         |      |         |      |         |      |         |      |         |      |
| 26 | Title                    |            |         |         |      |         |      |         |      |         |      |         |      |         |      |
| 27 | Title                    |            |         |         |      |         |      |         |      |         |      |         |      |         |      |
| 28 | Title                    |            |         |         |      |         |      |         |      |         |      |         |      |         |      |
| 29 | Title                    |            |         |         |      |         |      |         |      |         |      |         |      |         |      |
| 30 | Title                    |            |         |         |      |         |      |         |      |         |      |         |      |         |      |
| 31 | Title                    |            |         |         |      |         |      |         |      |         |      |         |      |         |      |

irbc cytokines

Row 21, Column A

SourceDataforFigure6A

Prism 8

File Sheet Undo Clipboard Analysis Change Import Draw Write Text Export Print Send LA Help

11 Arial

Search

Table format: Grouped

▼ Data Tables

- irbc cytokines
- xo + rbc cytokines**
- xo + irbcL cytokines
- New Data Table...

▼ Info

- New Info...

▼ Results

- New Analysis...

▼ Graphs

- irbc cytokines
- xo + rbc cytokines**
- xo + irbcL cytokines
- New Graph...

▼ Layouts

- New Layout...

Family

- xo + rbc cytokines**
- xo + rbc cytokines

|    |       | Group A          |             | Group B |      | Group C |      | Group D |      | Group E |      | Group F |      | Group G |      |
|----|-------|------------------|-------------|---------|------|---------|------|---------|------|---------|------|---------|------|---------|------|
|    |       | RBC Lysates + XO |             | Title   |      | Title   |      | Title   |      | Title   |      | Title   |      | Title   |      |
|    |       | A:Y1             | A:Y2        | B:Y1    | B:Y2 | C:Y1    | C:Y2 | D:Y1    | D:Y2 | E:Y1    | E:Y2 | F:Y1    | F:Y2 | G:Y1    | G:Y2 |
| 1  | TNF   | 15.459800        | 173.531700  |         |      |         |      |         |      |         |      |         |      |         |      |
| 2  | CXCL8 | 11.617600        | 45.947400   |         |      |         |      |         |      |         |      |         |      |         |      |
| 3  | IL18  | 6.843600         | 30.163600   |         |      |         |      |         |      |         |      |         |      |         |      |
| 4  | IL17A | 1.111700         | 0.512400    |         |      |         |      |         |      |         |      |         |      |         |      |
| 5  | IL13  | 1.111700         | 0.512400    |         |      |         |      |         |      |         |      |         |      |         |      |
| 6  | IL10  | 10.801100        | 6.349400    |         |      |         |      |         |      |         |      |         |      |         |      |
| 7  | IL6   | 464.684700       | 1001.479400 |         |      |         |      |         |      |         |      |         |      |         |      |
| 8  | IL5   | 1.111700         | 0.512400    |         |      |         |      |         |      |         |      |         |      |         |      |
| 9  | IL4   | 1.111700         | 0.512400    |         |      |         |      |         |      |         |      |         |      |         |      |
| 10 | IL2   | 1.111700         | 0.512400    |         |      |         |      |         |      |         |      |         |      |         |      |
| 11 | IL1R1 | 1.887100         | 3.299800    |         |      |         |      |         |      |         |      |         |      |         |      |
| 12 | IL1B  | 167.673800       | 843.592300  |         |      |         |      |         |      |         |      |         |      |         |      |
| 13 | IL1A  | 96.698100        | 188.409200  |         |      |         |      |         |      |         |      |         |      |         |      |
| 14 | Title |                  |             |         |      |         |      |         |      |         |      |         |      |         |      |
| 15 | Title |                  |             |         |      |         |      |         |      |         |      |         |      |         |      |
| 16 | Title |                  |             |         |      |         |      |         |      |         |      |         |      |         |      |
| 17 | Title |                  |             |         |      |         |      |         |      |         |      |         |      |         |      |
| 18 | Title |                  |             |         |      |         |      |         |      |         |      |         |      |         |      |
| 19 | Title |                  |             |         |      |         |      |         |      |         |      |         |      |         |      |
| 20 | Title |                  |             |         |      |         |      |         |      |         |      |         |      |         |      |
| 21 | Title |                  |             |         |      |         |      |         |      |         |      |         |      |         |      |
| 22 | Title |                  |             |         |      |         |      |         |      |         |      |         |      |         |      |
| 23 | Title |                  |             |         |      |         |      |         |      |         |      |         |      |         |      |
| 24 | Title |                  |             |         |      |         |      |         |      |         |      |         |      |         |      |
| 25 | Title |                  |             |         |      |         |      |         |      |         |      |         |      |         |      |
| 26 | Title |                  |             |         |      |         |      |         |      |         |      |         |      |         |      |
| 27 | Title |                  |             |         |      |         |      |         |      |         |      |         |      |         |      |
| 28 | Title |                  |             |         |      |         |      |         |      |         |      |         |      |         |      |
| 29 | Title |                  |             |         |      |         |      |         |      |         |      |         |      |         |      |
| 30 | Title |                  |             |         |      |         |      |         |      |         |      |         |      |         |      |
| 31 | Title |                  |             |         |      |         |      |         |      |         |      |         |      |         |      |

Row 15, A: RBC Lysates + XO

SourceDataforFigure6A

Prism8

File Sheet Undo Clipboard Analysis Change Import Draw Write Text Export Print Send LA Help

11 Arial

Search

▼ Data Tables

- irbc cytokines
- xo + rbc cytokines
- xo + irbcL cytokines**
- New Data Table...

▼ Info

- New Info...

▼ Results

- New Analysis...

▼ Graphs

- irbc cytokines
- xo + rbc cytokines
- xo + irbcL cytokines**
- New Graph...

▼ Layouts

- New Layout...

Family

- xo + irbcL cytokines**
- xo + irbcL cytokines

| Table format: |       | Group A           |            | Group B |      | Group C |      | Group D |      | Group E |      | Group F |      | Group G |      |
|---------------|-------|-------------------|------------|---------|------|---------|------|---------|------|---------|------|---------|------|---------|------|
| Grouped       |       | IRBC Lysates + XO |            | Title   |      | Title   |      | Title   |      | Title   |      | Title   |      | Title   |      |
|               |       | A:Y1              | A:Y2       | B:Y1    | B:Y2 | C:Y1    | C:Y2 | D:Y1    | D:Y2 | E:Y1    | E:Y2 | F:Y1    | F:Y2 | G:Y1    | G:Y2 |
| 1             | TNF   | 20.653400         | 180.838300 |         |      |         |      |         |      |         |      |         |      |         |      |
| 2             | CXCL8 | 12.092900         | 36.170200  |         |      |         |      |         |      |         |      |         |      |         |      |
| 3             | IL18  | 6.705900          | 38.111400  |         |      |         |      |         |      |         |      |         |      |         |      |
| 4             | IL17A | 3.137100          | 0.651000   |         |      |         |      |         |      |         |      |         |      |         |      |
| 5             | IL13  | 1.738300          | 0.651000   |         |      |         |      |         |      |         |      |         |      |         |      |
| 6             | IL10  | 20.604800         | 5.660100   |         |      |         |      |         |      |         |      |         |      |         |      |
| 7             | IL6   | 473.760500        | 795.094200 |         |      |         |      |         |      |         |      |         |      |         |      |
| 8             | IL5   | 5.167900          | 0.651000   |         |      |         |      |         |      |         |      |         |      |         |      |
| 9             | IL4   | 4.193600          | 0.651000   |         |      |         |      |         |      |         |      |         |      |         |      |
| 10            | IL2   | 2.289700          | 0.651000   |         |      |         |      |         |      |         |      |         |      |         |      |
| 11            | IL1R1 | 2.237400          | 2.071300   |         |      |         |      |         |      |         |      |         |      |         |      |
| 12            | IL1B  | 221.929100        | 976.124400 |         |      |         |      |         |      |         |      |         |      |         |      |
| 13            | IL1A  | 138.460500        | 148.704400 |         |      |         |      |         |      |         |      |         |      |         |      |
| 14            | Title |                   |            |         |      |         |      |         |      |         |      |         |      |         |      |
| 15            | Title |                   |            |         |      |         |      |         |      |         |      |         |      |         |      |
| 16            | Title |                   |            |         |      |         |      |         |      |         |      |         |      |         |      |
| 17            | Title |                   |            |         |      |         |      |         |      |         |      |         |      |         |      |
| 18            | Title |                   |            |         |      |         |      |         |      |         |      |         |      |         |      |
| 19            | Title |                   |            |         |      |         |      |         |      |         |      |         |      |         |      |
| 20            | Title |                   |            |         |      |         |      |         |      |         |      |         |      |         |      |
| 21            | Title |                   |            |         |      |         |      |         |      |         |      |         |      |         |      |
| 22            | Title |                   |            |         |      |         |      |         |      |         |      |         |      |         |      |
| 23            | Title |                   |            |         |      |         |      |         |      |         |      |         |      |         |      |
| 24            | Title |                   |            |         |      |         |      |         |      |         |      |         |      |         |      |
| 25            | Title |                   |            |         |      |         |      |         |      |         |      |         |      |         |      |
| 26            | Title |                   |            |         |      |         |      |         |      |         |      |         |      |         |      |
| 27            | Title |                   |            |         |      |         |      |         |      |         |      |         |      |         |      |
| 28            | Title |                   |            |         |      |         |      |         |      |         |      |         |      |         |      |
| 29            | Title |                   |            |         |      |         |      |         |      |         |      |         |      |         |      |
| 30            | Title |                   |            |         |      |         |      |         |      |         |      |         |      |         |      |
| 31            | Title |                   |            |         |      |         |      |         |      |         |      |         |      |         |      |

Row 18, A: IRBC Lysates + XO

SourceDataforFigure6B

Prism 8

File Sheet Undo Clipboard Analysis Change Import Draw Write Text Export Print Send LA Help

Q Search

Table format: Grouped

|    | Table format: | Group A     |             | Group B     |             | Group C     |             | Group D     |             | Group E     |             | Group F     |             | Group G     |             | Group H     |
|----|---------------|-------------|-------------|-------------|-------------|-------------|-------------|-------------|-------------|-------------|-------------|-------------|-------------|-------------|-------------|-------------|
|    |               | Control     | RBCL        | iRBCL       | LPS         | XO          | XO+RBCL     | XO+IRBCL    | XO+         |             |             |             |             |             |             |             |
|    |               | A:Y1        | A:Y2        | B:Y1        | B:Y2        | C:Y1        | C:Y2        | D:Y1        | D:Y2        | E:Y1        | E:Y2        | F:Y1        | F:Y2        | G:Y1        | G:Y2        | H:Y1        |
| 1  | Title         | 1.000000000 | 1.000000000 | 1.279188690 | 1.364228773 | 1.289736531 | 1.773013053 | 21.64030521 | 27.21391262 | 17.15675329 | 24.50901959 | 18.11457135 | 20.16325229 | 18.36657027 | 15.79911713 | 29.33624241 |
| 2  | Title         |             |             |             |             |             |             |             |             |             |             |             |             |             |             |             |
| 3  | Title         |             |             |             |             |             |             |             |             |             |             |             |             |             |             |             |
| 4  | Title         |             |             |             |             |             |             |             |             |             |             |             |             |             |             |             |
| 5  | Title         |             |             |             |             |             |             |             |             |             |             |             |             |             |             |             |
| 6  | Title         |             |             |             |             |             |             |             |             |             |             |             |             |             |             |             |
| 7  | Title         |             |             |             |             |             |             |             |             |             |             |             |             |             |             |             |
| 8  | Title         |             |             |             |             |             |             |             |             |             |             |             |             |             |             |             |
| 9  | Title         |             |             |             |             |             |             |             |             |             |             |             |             |             |             |             |
| 10 | Title         |             |             |             |             |             |             |             |             |             |             |             |             |             |             |             |
| 11 | Title         |             |             |             |             |             |             |             |             |             |             |             |             |             |             |             |
| 12 | Title         |             |             |             |             |             |             |             |             |             |             |             |             |             |             |             |
| 13 | Title         |             |             |             |             |             |             |             |             |             |             |             |             |             |             |             |
| 14 | Title         |             |             |             |             |             |             |             |             |             |             |             |             |             |             |             |
| 15 | Title         |             |             |             |             |             |             |             |             |             |             |             |             |             |             |             |
| 16 | Title         |             |             |             |             |             |             |             |             |             |             |             |             |             |             |             |
| 17 | Title         |             |             |             |             |             |             |             |             |             |             |             |             |             |             |             |
| 18 | Title         |             |             |             |             |             |             |             |             |             |             |             |             |             |             |             |
| 19 | Title         |             |             |             |             |             |             |             |             |             |             |             |             |             |             |             |
| 20 | Title         |             |             |             |             |             |             |             |             |             |             |             |             |             |             |             |
| 21 | Title         |             |             |             |             |             |             |             |             |             |             |             |             |             |             |             |
| 22 | Title         |             |             |             |             |             |             |             |             |             |             |             |             |             |             |             |
| 23 | Title         |             |             |             |             |             |             |             |             |             |             |             |             |             |             |             |
| 24 | Title         |             |             |             |             |             |             |             |             |             |             |             |             |             |             |             |
| 25 | Title         |             |             |             |             |             |             |             |             |             |             |             |             |             |             |             |
| 26 | Title         |             |             |             |             |             |             |             |             |             |             |             |             |             |             |             |
| 27 | Title         |             |             |             |             |             |             |             |             |             |             |             |             |             |             |             |
| 28 | Title         |             |             |             |             |             |             |             |             |             |             |             |             |             |             |             |
| 29 | Title         |             |             |             |             |             |             |             |             |             |             |             |             |             |             |             |
| 30 | Title         |             |             |             |             |             |             |             |             |             |             |             |             |             |             |             |
| 31 | Title         |             |             |             |             |             |             |             |             |             |             |             |             |             |             |             |
| 32 | Title         |             |             |             |             |             |             |             |             |             |             |             |             |             |             |             |
| 33 | Title         |             |             |             |             |             |             |             |             |             |             |             |             |             |             |             |
| 34 | Title         |             |             |             |             |             |             |             |             |             |             |             |             |             |             |             |

Family

- Relative abundance
- Relative abundance

Relative abundance

Row CT, H: XO+LPS

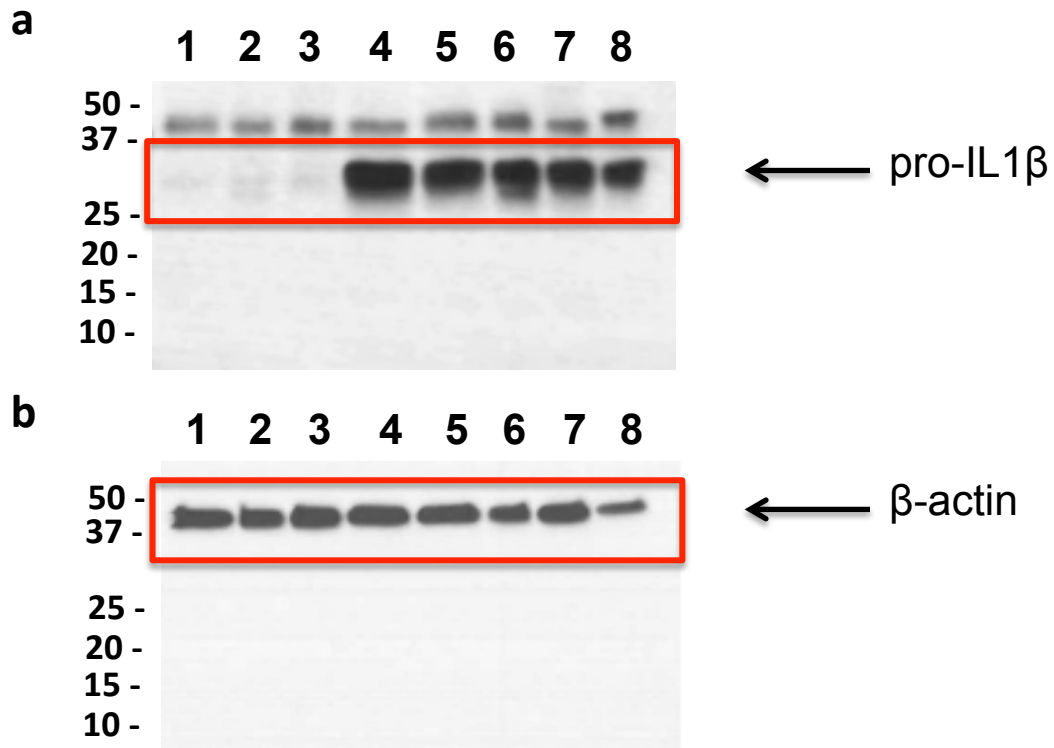

**Source Data for Figure 6B: Addition of XO leads to the expression of pro-IL1 $\beta$ .** Western blot was probed with (A) 1:1000 IL1 $\beta$  (rabbit, Abcam) antibody and (B) 1:1000  $\beta$ -actin (Cell Signaling), followed by 1:2000 HRP-coupled secondary antibody (Cell Signaling). Lanes are labeled as follows: (1) Media (2) RBCL (3) iRBCL (4) LPS (5) XO (6) XO+ rbcL (7) XO + iRBCL (8) XO+LPS. Red boxes indicate the lanes that were chosen for the bar graph (prism file) and the part of the blot chosen for the final figure.

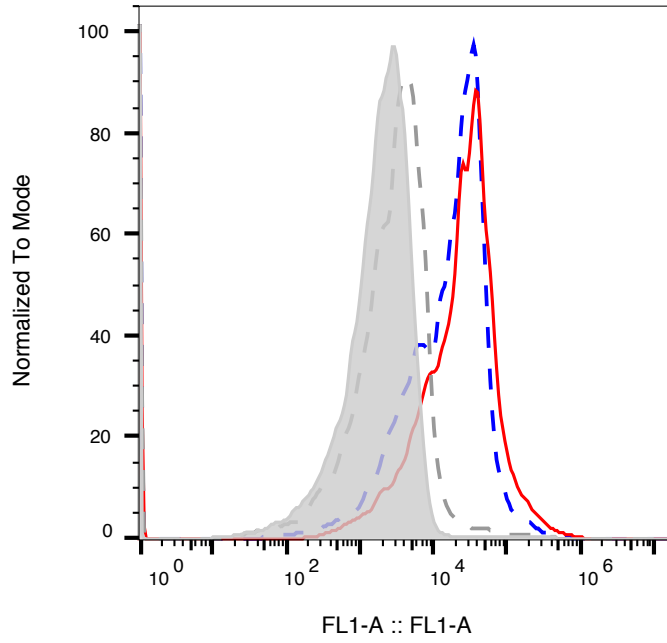

| Sample Name      | Subset Name | Count |
|------------------|-------------|-------|
| C02 rbcL.fcs     | Singlets    | 28828 |
| D02 xo rbcL.fcs  | Singlets    | 7081  |
| C03 irbcL.fcs    | Singlets    | 5498  |
| D03 xo irbcL.fcs | Singlets    | 9770  |

SourceDataforFigure6D

Prism 8

File Sheet Undo Clipboard Analysis Change Import Draw Write Text Export Print Send LA Help

Q Search

Table format: Grouped

|                   |    | Group A        | Group B       | Group C       | Group D | Group E | Group F | Group G | Group H | Group I | Group J | Group K | Group L | Group M | Group N |
|-------------------|----|----------------|---------------|---------------|---------|---------|---------|---------|---------|---------|---------|---------|---------|---------|---------|
|                   |    | negative siRNA | siRNA NLRP3-1 | siRNA NLRP3-2 | Title   | Title   | Title   | Title   | Title   | Title   | Title   | Title   | Title   | Title   | Title   |
| ▼ Data Tables     |    | Y              | Y             | Y             | Y       | Y       | Y       | Y       | Y       | Y       | Y       | Y       | Y       | Y       | Y       |
| ▼ donor 1 - fig6d |    |                |               |               |         |         |         |         |         |         |         |         |         |         |         |
| donor 2           | 1  | RBCL           | 1.00          | 1.00          | 1.00    |         |         |         |         |         |         |         |         |         |         |
| +                 | 2  | XO+RBCL        | 18.17         | 3.10          | 1.91    |         |         |         |         |         |         |         |         |         |         |
| +                 | 3  | iRBCL          | 1.00          | 1.00          | 1.00    |         |         |         |         |         |         |         |         |         |         |
| ▼ Info            | 4  | XO+iRBCL       | 207.26        | 31.56         | 39.53   |         |         |         |         |         |         |         |         |         |         |
| Project info 1    | 5  | Title          |               |               |         |         |         |         |         |         |         |         |         |         |         |
| Project info 1    | 6  | Title          |               |               |         |         |         |         |         |         |         |         |         |         |         |
| +                 | 7  | Title          |               |               |         |         |         |         |         |         |         |         |         |         |         |
| ▼ Results         | 8  | Title          |               |               |         |         |         |         |         |         |         |         |         |         |         |
| +                 | 9  | Title          |               |               |         |         |         |         |         |         |         |         |         |         |         |
| ▼ Graphs          | 10 | Title          |               |               |         |         |         |         |         |         |         |         |         |         |         |
| donor 1 - fig6d   | 11 | Title          |               |               |         |         |         |         |         |         |         |         |         |         |         |
| donor 2           | 12 | Title          |               |               |         |         |         |         |         |         |         |         |         |         |         |
| +                 | 13 | Title          |               |               |         |         |         |         |         |         |         |         |         |         |         |
| ▼ Layouts         | 14 | Title          |               |               |         |         |         |         |         |         |         |         |         |         |         |
| +                 | 15 | Title          |               |               |         |         |         |         |         |         |         |         |         |         |         |
|                   | 16 | Title          |               |               |         |         |         |         |         |         |         |         |         |         |         |
|                   | 17 | Title          |               |               |         |         |         |         |         |         |         |         |         |         |         |
| Family            | 18 | Title          |               |               |         |         |         |         |         |         |         |         |         |         |         |
| donor 1 - fig6d   | 19 | Title          |               |               |         |         |         |         |         |         |         |         |         |         |         |
| donor 1 - fig6d   | 20 | Title          |               |               |         |         |         |         |         |         |         |         |         |         |         |
|                   | 21 | Title          |               |               |         |         |         |         |         |         |         |         |         |         |         |
|                   | 22 | Title          |               |               |         |         |         |         |         |         |         |         |         |         |         |
|                   | 23 | Title          |               |               |         |         |         |         |         |         |         |         |         |         |         |
|                   | 24 | Title          |               |               |         |         |         |         |         |         |         |         |         |         |         |
|                   | 25 | Title          |               |               |         |         |         |         |         |         |         |         |         |         |         |
|                   | 26 | Title          |               |               |         |         |         |         |         |         |         |         |         |         |         |
|                   | 27 | Title          |               |               |         |         |         |         |         |         |         |         |         |         |         |
|                   | 28 | Title          |               |               |         |         |         |         |         |         |         |         |         |         |         |
|                   | 29 | Title          |               |               |         |         |         |         |         |         |         |         |         |         |         |
|                   | 30 | Title          |               |               |         |         |         |         |         |         |         |         |         |         |         |
|                   | 31 | Title          |               |               |         |         |         |         |         |         |         |         |         |         |         |
|                   | 32 | Title          |               |               |         |         |         |         |         |         |         |         |         |         |         |
|                   | 33 | Title          |               |               |         |         |         |         |         |         |         |         |         |         |         |
|                   | 34 | Title          |               |               |         |         |         |         |         |         |         |         |         |         |         |

donor 1 - fig6d

Row 11, B: siRNA NLRP3-1

SourceDataforFigure6D

Prism 8

File Sheet Undo Clipboard Analysis Change Import Draw Write Text Export Print Send LA Help

Q Search

Table format: Grouped

|                     |    | Group A        | Group B       | Group C       | Group D | Group E | Group F | Group G | Group H | Group I | Group J | Group K | Group L | Group M | Group N |
|---------------------|----|----------------|---------------|---------------|---------|---------|---------|---------|---------|---------|---------|---------|---------|---------|---------|
|                     |    | negative siRNA | siRNA NLRP3-1 | SIRNA NLRP3-2 | Title   | Title   | Title   | Title   | Title   | Title   | Title   | Title   | Title   | Title   | Title   |
| ▼ Data Tables       |    | Y              | Y             | Y             | Y       | Y       | Y       | Y       | Y       | Y       | Y       | Y       | Y       | Y       | Y       |
| donor 1 - fig6d     |    |                |               |               |         |         |         |         |         |         |         |         |         |         |         |
| donor 2             | 1  | RBCL           | 1.00          | 1.00          | 1.00    |         |         |         |         |         |         |         |         |         |         |
|                     | 2  | XO+RBCL        | 1.00          | 1.00          | 1.00    |         |         |         |         |         |         |         |         |         |         |
| ⊕ New Data Table... | 3  | iRBCL          | 1.00          | 1.00          | 1.00    |         |         |         |         |         |         |         |         |         |         |
| ▼ Info              | 4  | XO+iRBCL       | 13.90         | 1.70          | 2.69    |         |         |         |         |         |         |         |         |         |         |
| Project info 1      | 5  | Title          |               |               |         |         |         |         |         |         |         |         |         |         |         |
| Project info 1      | 6  | Title          |               |               |         |         |         |         |         |         |         |         |         |         |         |
| ⊕ New Info...       | 7  | Title          |               |               |         |         |         |         |         |         |         |         |         |         |         |
| ▼ Results           | 8  | Title          |               |               |         |         |         |         |         |         |         |         |         |         |         |
| ⊕ New Analysis...   | 9  | Title          |               |               |         |         |         |         |         |         |         |         |         |         |         |
| ▼ Graphs            | 10 | Title          |               |               |         |         |         |         |         |         |         |         |         |         |         |
| donor 1 - fig6d     | 11 | Title          |               |               |         |         |         |         |         |         |         |         |         |         |         |
| donor 2             | 12 | Title          |               |               |         |         |         |         |         |         |         |         |         |         |         |
| ⊕ New Graph...      | 13 | Title          |               |               |         |         |         |         |         |         |         |         |         |         |         |
| ▼ Layouts           | 14 | Title          |               |               |         |         |         |         |         |         |         |         |         |         |         |
| ⊕ New Layout...     | 15 | Title          |               |               |         |         |         |         |         |         |         |         |         |         |         |
|                     | 16 | Title          |               |               |         |         |         |         |         |         |         |         |         |         |         |
|                     | 17 | Title          |               |               |         |         |         |         |         |         |         |         |         |         |         |
| Family              | 18 | Title          |               |               |         |         |         |         |         |         |         |         |         |         |         |
| donor 2             | 19 | Title          |               |               |         |         |         |         |         |         |         |         |         |         |         |
| donor 2             | 20 | Title          |               |               |         |         |         |         |         |         |         |         |         |         |         |
|                     | 21 | Title          |               |               |         |         |         |         |         |         |         |         |         |         |         |
|                     | 22 | Title          |               |               |         |         |         |         |         |         |         |         |         |         |         |
|                     | 23 | Title          |               |               |         |         |         |         |         |         |         |         |         |         |         |
|                     | 24 | Title          |               |               |         |         |         |         |         |         |         |         |         |         |         |
|                     | 25 | Title          |               |               |         |         |         |         |         |         |         |         |         |         |         |
|                     | 26 | Title          |               |               |         |         |         |         |         |         |         |         |         |         |         |
|                     | 27 | Title          |               |               |         |         |         |         |         |         |         |         |         |         |         |
|                     | 28 | Title          |               |               |         |         |         |         |         |         |         |         |         |         |         |
|                     | 29 | Title          |               |               |         |         |         |         |         |         |         |         |         |         |         |
|                     | 30 | Title          |               |               |         |         |         |         |         |         |         |         |         |         |         |
|                     | 31 | Title          |               |               |         |         |         |         |         |         |         |         |         |         |         |
|                     | 32 | Title          |               |               |         |         |         |         |         |         |         |         |         |         |         |
|                     | 33 | Title          |               |               |         |         |         |         |         |         |         |         |         |         |         |
|                     | 34 | Title          |               |               |         |         |         |         |         |         |         |         |         |         |         |

donor 2

Row 6, A: negative siRNA
